# Supplementary material for: Massively Parallel Signature Sequencing and Bioinformatics Analysis Identifies Up-Regulation of TGFBI and SOX4 in Human Glioblastoma
Source: PLoS One. 2010 Apr 19;5(4):e10210. doi: 10.1371/journal.pone.0010210 (PMC2856677; doi:10.1371/journal.pone.0010210)
Supplement: Table S1 — All MPSS tags identified and their expression data in the normal brain tissues and the GBM tissues. (5.78 MB XLS) [file pone.0010210.s001.xls]

## Sheet: out
Table S1: All significant MPSS tags identified in GBM and normal brain tissues
Signature	Significant	Selected_Step	Class	Accession	Description	UI_HuBr_norm_SELECTED_MEAN_N	UI_HuBr_norm_STDV	UI_HuBr_tumr_SELECTED_MEAN_N	UI_HuBr_tumr_STDV	P-Val*: UI_HuBr_norm | UI_HuBr_tumr	FDR
GATCCACCCACCTCGGA	s	T	0	REPEAT	*** WARNING >100 Genome Hits ***	0	0	4	4	0.290216	0.686951
GATCCAGGAAGCTCAGA	s	T	0	REPEAT	*** WARNING >100 Genome Hits ***	0	0	4	4	0.290216	0.686951
GATCCACTTCCACTTAA	s	T	0	REPEAT	*** WARNING >100 Genome Hits ***	0	0	4	4	0.290216	0.686951
GATCCTCCTGCCTCTGC	s	T	0	REPEAT	*** WARNING >100 Genome Hits ***	0	0	4	4	0.290216	0.686951
GATCACAGGTGCCCACC	s	T	0	REPEAT	*** WARNING >100 Genome Hits ***	5	5	0	0	0.181179	0.678357
GATCCTGTCTCAAAAAA	s	T	0	REPEAT	*** WARNING >100 Genome Hits ***	5	5	0	0	0.181179	0.678357
GATCCTTGAGGAATCAC	s	T	0	REPEAT	*** WARNING >100 Genome Hits ***	5	2	0	0	0.181179	0.678357
GATCCACCAACAGCTTG	s	T	0	REPEAT	*** WARNING >100 Genome Hits ***	5	5	0	0	0.181179	0.678357
GATCCTCTCGCCTCAGC	s	T	0	REPEAT	*** WARNING >100 Genome Hits ***	5	5	0	0	0.181179	0.678357
GATCCAGTTTCAGCTTT	s	T	0	REPEAT	*** WARNING >100 Genome Hits ***	5	2	0	0	0.181179	0.678357
GATCCACCTACGACCTC	s	T	0	REPEAT	*** WARNING >100 Genome Hits ***	5	5	0	0	0.181179	0.678357
GATCTACAGATTCAATG	s	T	0	REPEAT	*** WARNING >100 Genome Hits ***	5	5	0	0	0.181179	0.678357
GATCCAAACACCTCCCA	s	T	0	REPEAT	*** WARNING >100 Genome Hits ***	5	5	2	2	0.630424	0.844415
GATCCTCCTACCTCAGT	s	T	0	REPEAT	*** WARNING >100 Genome Hits ***	0	0	6	6	0.134721	0.686951
GATCCCATCACTGCACT	s	T	0	REPEAT	*** WARNING >100 Genome Hits ***	0	0	6	6	0.134721	0.686951
GATCCACCTGCCCCAGC	s	T	0	REPEAT	*** WARNING >100 Genome Hits ***	0	0	6	5	0.134721	0.686951
GATCATGTTCTTTGCAG	s	T	0	REPEAT	*** WARNING >100 Genome Hits ***	5	5	6	6	0.910701	0.883973
GATCCAGCAATTTCACT	s	T	0	REPEAT	*** WARNING >100 Genome Hits ***	7	3	0	0	0.181179	0.618326
GATCTTTCCTGCTTTCT	s	T	0	REPEAT	*** WARNING >100 Genome Hits ***	7	0	0	0	0.181179	0.618326
GATCCGCCCTCCTCGGC	s	T	0	REPEAT	*** WARNING >100 Genome Hits ***	7	7	0	0	0.181179	0.618326
GATCATCAAGGCAGAAA	s	T	0	REPEAT	*** WARNING >100 Genome Hits ***	7	0	0	0	0.181179	0.618326
GATCCTCCCAAGTAGCT	s	T	0	REPEAT	*** WARNING >100 Genome Hits ***	7	0	0	0	0.181179	0.618326
GATCTGCCCACCTTGGT	s	T	0	REPEAT	*** WARNING >100 Genome Hits ***	7	6	0	0	0.181179	0.618326
GATCTTGCTGGGAGCTG	s	T	0	REPEAT	*** WARNING >100 Genome Hits ***	0	0	7	8	0.134721	0.636774
GATCACCTGAGATTGGG	s	T	0	REPEAT	*** WARNING >100 Genome Hits ***	0	0	7	7	0.134721	0.636774
GATCCACTCGCCTCAGC	s	T	0	REPEAT	*** WARNING >100 Genome Hits ***	0	0	7	8	0.134721	0.636774
GATCCTCTGCCTCAGCC	s	T	0	REPEAT	*** WARNING >100 Genome Hits ***	0	0	7	7	0.134721	0.636774
GATCAACAAAATTGACA	s	T	0	REPEAT	*** WARNING >100 Genome Hits ***	7	4	2	2	0.630424	0.779415
GATCCAGGAATCCCACT	s	T	0	REPEAT	*** WARNING >100 Genome Hits ***	8	1	0	0	0.101495	0.618326
GATCATGTCCTCTGCAG	s	T	0	REPEAT	*** WARNING >100 Genome Hits ***	8	2	0	0	0.101495	0.618326
GATCTCTTGACCTTGTG	s	T	0	REPEAT	*** WARNING >100 Genome Hits ***	8	1	0	0	0.101495	0.618326
GATCTTCGACAAACCTG	s	T	0	REPEAT	*** WARNING >100 Genome Hits ***	8	1	0	0	0.101495	0.618326
GATCCTACCACTGCACT	s	T	0	REPEAT	*** WARNING >100 Genome Hits ***	8	9	0	0	0.101495	0.618326
GATCCTCCTGCTTCAGT	s	T	0	REPEAT	*** WARNING >100 Genome Hits ***	8	8	0	0	0.101495	0.618326
GATCATCACCTAGGCAC	s	T	0	REPEAT	*** WARNING >100 Genome Hits ***	8	2	0	0	0.101495	0.618326
GATCGTCTGAAGCCTTC	s	T	0	REPEAT	*** WARNING >100 Genome Hits ***	8	9	0	0	0.101495	0.618326
GATCCCACAGAAATGCA	s	T	0	REPEAT	*** WARNING >100 Genome Hits ***	8	5	6	6	0.747054	0.853335
GATCACCCGAGGTCGGG	s	T	0	REPEAT	*** WARNING >100 Genome Hits ***	0	0	9	10	0.0669655	0.594545
GATCATAGGTGTGAGCC	s	T	0	REPEAT	*** WARNING >100 Genome Hits ***	0	0	9	2	0.0669655	0.594545
GATCCACCCACCCTGGC	s	T	0	REPEAT	*** WARNING >100 Genome Hits ***	0	0	9	9	0.0669655	0.594545
GATCATCTGAAGCCTTC	s	T	0	REPEAT	*** WARNING >100 Genome Hits ***	0	0	9	5	0.0669655	0.594545
GATCATTAGTGGCTACT	s	T	0	REPEAT	*** WARNING >100 Genome Hits ***	0	0	9	10	0.0669655	0.594545
GATCCCATCACCCAGGT	s	T	0	REPEAT	*** WARNING >100 Genome Hits ***	8	8	9	9	0.890746	0.859563
GATCCACCCACCTTGGG	s	T	0	REPEAT	*** WARNING >100 Genome Hits ***	10	3	0	0	0.101495	0.433224
GATCAGCCTAGCCAACA	s	T	0	REPEAT	*** WARNING >100 Genome Hits ***	10	7	0	0	0.101495	0.433224
GATCGTGTCCTTTGCAG	s	T	0	REPEAT	*** WARNING >100 Genome Hits ***	10	10	0	0	0.101495	0.433224
GATCCCATTTGCCAATT	s	T	0	REPEAT	*** WARNING >100 Genome Hits ***	10	0	0	0	0.101495	0.433224
GATCACAACACTGCACT	s	T	0	REPEAT	*** WARNING >100 Genome Hits ***	0	0	11	11	0.0669655	0.594545
GATCTTCTCAGCTTAGC	s	T	0	REPEAT	*** WARNING >100 Genome Hits ***	0	0	11	11	0.0669655	0.594545
GATCCTCCCAAAGTGCT	s	T	0	REPEAT	*** WARNING >100 Genome Hits ***	3	3	11	0	0.265396	0.734393
GATCCACCTGTCTTGGC	s	T	0	REPEAT	*** WARNING >100 Genome Hits ***	12	12	0	0	0.0586249	0.399179
GATCCTCTCGCCTTGGC	s	T	0	REPEAT	*** WARNING >100 Genome Hits ***	12	1	0	0	0.0586249	0.399179
GATCCCGCCATTGCACT	s	T	0	REPEAT	*** WARNING >100 Genome Hits ***	12	11	0	0	0.0586249	0.399179
GATCATGTGAGGTCAGG	s	T	0	REPEAT	*** WARNING >100 Genome Hits ***	12	11	0	0	0.0586249	0.399179
GATCTGATGGTTTTGTA	s	T	0	REPEAT	*** WARNING >100 Genome Hits ***	12	11	0	0	0.0586249	0.399179
GATCCTGGGTGTGTCTG	s	T	0	REPEAT	*** WARNING >100 Genome Hits ***	12	1	0	0	0.0586249	0.399179
GATCCCAAGGCAGAAGA	s	T	0	REPEAT	*** WARNING >100 Genome Hits ***	12	5	2	2	0.223086	0.642973
GATCCACCCACCTCCAC	s	T	0	REPEAT	*** WARNING >100 Genome Hits ***	13	14	0	0	0.0586249	0.399179
GATCCTCCTGCCTCCAC	s	T	0	REPEAT	*** WARNING >100 Genome Hits ***	13	13	0	0	0.0586249	0.399179
GATCCGCTGTTAGTCTG	s	T	0	REPEAT	*** WARNING >100 Genome Hits ***	13	14	0	0	0.0586249	0.399179
GATCTTGCTCTGTTGCC	s	T	0	REPEAT	*** WARNING >100 Genome Hits ***	0	0	13	13	0.034404	0.404659
GATCATGTGAGCCCAGG	s	T	0	REPEAT	*** WARNING >100 Genome Hits ***	0	0	13	13	0.034404	0.404659
GATCACATCATTGCACT	s	T	0	REPEAT	*** WARNING >100 Genome Hits ***	0	0	15	15	0.034404	0.383968
GATCATGGCTCATTGCA	s	T	0	REPEAT	*** WARNING >100 Genome Hits ***	0	0	15	15	0.034404	0.383968
GATCACTGGAGCCTGGG	s	T	0	REPEAT	*** WARNING >100 Genome Hits ***	0	0	15	15	0.034404	0.383968
GATCCTCCTGCCTCGGT	s	T	0	REPEAT	*** WARNING >100 Genome Hits ***	15	14	4	4	0.13408	0.673901
GATCCAAAATTGACACC	s	T	0	REPEAT	*** WARNING >100 Genome Hits ***	17	4	0	0	0.0344982	0.231134
GATCTGCTCGCCTTGGC	s	T	0	REPEAT	*** WARNING >100 Genome Hits ***	17	7	0	0	0.0344982	0.231134
GATCACGAGTTCAGGAG	s	T	0	REPEAT	*** WARNING >100 Genome Hits ***	0	0	17	17	0.0180309	0.238835
GATCCTCCTGCCTTGGG	s	T	0	REPEAT	*** WARNING >100 Genome Hits ***	0	0	17	17	0.0180309	0.238835
GATCCAGCAATCTCACT	s	T	0	REPEAT	*** WARNING >100 Genome Hits ***	0	0	17	1	0.0180309	0.238835
GATCATTGATGAAGGTG	s	T	0	REPEAT	*** WARNING >100 Genome Hits ***	3	3	17	5	0.0762406	0.428561
GATCACCTGAGCTTGGG	s	T	0	REPEAT	*** WARNING >100 Genome Hits ***	10	10	17	17	0.386033	0.806271
GATCAAGCGATTCTCCT	s	T	0	REPEAT	*** WARNING >100 Genome Hits ***	18	9	0	0	0.0205587	0.231134
GATCCTCCCATCTTGGC	s	T	0	REPEAT	*** WARNING >100 Genome Hits ***	18	1	0	0	0.0205587	0.231134
GATCCTCCCATTTCAGC	s	T	0	REPEAT	*** WARNING >100 Genome Hits ***	18	19	0	0	0.0205587	0.231134
GATCATGGTTCACTGCA	s	T	0	REPEAT	*** WARNING >100 Genome Hits ***	18	2	0	0	0.0205587	0.231134
GATCCACCCGCCTCTGC	s	T	0	REPEAT	*** WARNING >100 Genome Hits ***	0	0	19	18	0.0180309	0.22588
GATCCGCCCGCCTCTGC	s	T	0	REPEAT	*** WARNING >100 Genome Hits ***	0	0	19	18	0.0180309	0.22588
GATCATGGCTTACTGCA	s	T	0	REPEAT	*** WARNING >100 Genome Hits ***	0	0	19	19	0.0180309	0.22588
GATCCACCCGCCTCAGG	s	T	0	REPEAT	*** WARNING >100 Genome Hits ***	20	4	0	0	0.0205587	0.216203
GATCCTGCCACTGCATT	s	T	0	REPEAT	*** WARNING >100 Genome Hits ***	0	0	20	21	0.00957784	0.22588
GATCCAAATAAGCACAA	s	T	0	REPEAT	*** WARNING >100 Genome Hits ***	0	0	20	21	0.00957784	0.22588
GATCTGAGGTGGAACAG	s	T	0	REPEAT	*** WARNING >100 Genome Hits ***	7	6	20	1	0.115244	0.673597
GATCCCCTGAGGTCAGG	s	T	0	REPEAT	*** WARNING >100 Genome Hits ***	22	22	0	0	0.0123649	0.173524
GATCGTGCCCCTGCACT	s	T	0	REPEAT	*** WARNING >100 Genome Hits ***	22	21	0	0	0.0123649	0.173524
GATCGCGGCTCACTGCA	s	T	0	REPEAT	*** WARNING >100 Genome Hits ***	22	21	0	0	0.0123649	0.173524
GATCATGTCACTGTACT	s	T	0	REPEAT	*** WARNING >100 Genome Hits ***	22	6	0	0	0.0123649	0.173524
GATCAAGCAATCCTCCT	s	T	0	REPEAT	*** WARNING >100 Genome Hits ***	22	7	0	0	0.0123649	0.173524
GATCGTGCCACTGCACA	s	T	0	REPEAT	*** WARNING >100 Genome Hits ***	22	22	0	0	0.0123649	0.173524
GATCAGACTGTTACTGT	s	T	0	REPEAT	*** WARNING >100 Genome Hits ***	22	11	0	0	0.0123649	0.173524
GATCATGCGACTGCACT	s	T	0	REPEAT	*** WARNING >100 Genome Hits ***	0	0	22	11	0.00957784	0.184749
GATCCACCTGCCTCGAC	s	T	0	REPEAT	*** WARNING >100 Genome Hits ***	0	0	22	22	0.00957784	0.184749
GATCGTGTCATTGCACT	s	T	0	REPEAT	*** WARNING >100 Genome Hits ***	17	16	22	23	0.625567	0.855279
GATCCTCCTGCCTCAAC	s	T	0	REPEAT	*** WARNING >100 Genome Hits ***	23	14	0	0	0.0123649	0.173524
GATCATGCCACTGCAGT	s	T	0	REPEAT	*** WARNING >100 Genome Hits ***	23	1	0	0	0.0123649	0.173524
GATCGTACCATTGCACT	s	T	0	REPEAT	*** WARNING >100 Genome Hits ***	0	0	24	25	0.0051375	0.169253
GATCCGCCTGCCTGGGC	s	T	0	REPEAT	*** WARNING >100 Genome Hits ***	10	0	24	5	0.148671	0.658939
GATCCACCCGTCTCAGC	s	T	0	REPEAT	*** WARNING >100 Genome Hits ***	25	24	0	0	0.00748908	0.161136
GATCAGCCTGAGCAACA	s	T	0	REPEAT	*** WARNING >100 Genome Hits ***	25	1	0	0	0.00748908	0.161136
GATCCACCTGCCTTGAC	s	T	0	REPEAT	*** WARNING >100 Genome Hits ***	0	0	26	27	0.0051375	0.169253
GATCGCATCACTGCACT	s	T	0	REPEAT	*** WARNING >100 Genome Hits ***	27	21	0	0	0.00748908	0.129606
GATCATGCCGCTGCACT	s	T	0	REPEAT	*** WARNING >100 Genome Hits ***	28	27	0	0	0.00456115	0.129606
GATCGCAACACTGCACT	s	T	0	REPEAT	*** WARNING >100 Genome Hits ***	28	1	0	0	0.00456115	0.129606
GATCACGTCACTGCACT	s	T	0	REPEAT	*** WARNING >100 Genome Hits ***	28	27	0	0	0.00456115	0.129606
GATCCCCTGAGCCCAGG	s	T	0	REPEAT	*** WARNING >100 Genome Hits ***	28	4	0	0	0.00456115	0.129606
GATCCACTCACCTCAGC	s	T	0	REPEAT	*** WARNING >100 Genome Hits ***	28	29	0	0	0.00456115	0.129606
GATCCCTCATGAATGGC	s	T	0	REPEAT	*** WARNING >100 Genome Hits ***	0	0	28	5	0.00277623	0.156764
GATCCACACGCCTTGGC	s	T	0	REPEAT	*** WARNING >100 Genome Hits ***	0	0	28	27	0.00277623	0.156764
GATCCATGGGCTGCAGA	s	T	0	REPEAT	*** WARNING >100 Genome Hits ***	0	0	28	12	0.00277623	0.156764
GATCCCAGGTCTTTAGA	s	T	0	REPEAT	*** WARNING >100 Genome Hits ***	30	8	0	0	0.00456115	0.121827
GATCATGTCTTTTGCAG	s	T	0	REPEAT	*** WARNING >100 Genome Hits ***	18	4	30	1	0.456156	0.773915
GATCCTTGAGGAATCGC	s	T	0	REPEAT	*** WARNING >100 Genome Hits ***	32	4	0	0	0.00279045	0.0977861
GATCATCTGAGGTTGGG	s	T	0	REPEAT	*** WARNING >100 Genome Hits ***	32	17	0	0	0.00279045	0.0977861
GATCCCGGGAGGCGGAG	s	T	0	REPEAT	*** WARNING >100 Genome Hits ***	0	0	32	6	0.00150902	0.120621
GATCATGCCTGTGAATA	s	T	0	REPEAT	*** WARNING >100 Genome Hits ***	13	1	32	1	0.111579	0.612265
GATCGTGTCACTGCACT	s	T	0	REPEAT	*** WARNING >100 Genome Hits ***	33	35	0	0	0.00279045	0.0977861
GATCCCAGGAGGTTGAG	s	T	0	REPEAT	*** WARNING >100 Genome Hits ***	0	0	33	1	0.00150902	0.120621
GATCTACCAAGCAAACG	s	T	0	REPEAT	*** WARNING >100 Genome Hits ***	0	0	33	1	0.00150902	0.120621
GATCACCTGATGTCAGG	s	T	0	REPEAT	*** WARNING >100 Genome Hits ***	0	0	33	33	0.00150902	0.120621
GATCTGAGAACGGGCAG	s	T	0	REPEAT	*** WARNING >100 Genome Hits ***	33	2	13	2	0.162629	0.599557
GATCATGCCACTGTACC	s	T	0	REPEAT	*** WARNING >100 Genome Hits ***	33	9	15	15	0.162629	0.642983
GATCGTGCCACTACACT	s	T	0	REPEAT	*** WARNING >100 Genome Hits ***	35	36	0	0	0.00171353	0.0929818
GATCCACCTGCCTTGGG	s	T	0	REPEAT	*** WARNING >100 Genome Hits ***	35	3	0	0	0.00171353	0.0929818
GATCCTCTCACCTTGGC	s	T	0	REPEAT	*** WARNING >100 Genome Hits ***	0	0	35	34	0.000824106	0.096944
GATCACATCACTGCACT	s	T	0	REPEAT	*** WARNING >100 Genome Hits ***	37	35	0	0	0.00171353	0.073078
GATCTCCTGACCTTGTG	s	T	0	REPEAT	*** WARNING >100 Genome Hits ***	37	35	0	0	0.00171353	0.073078
GATCCACCTGTCTCAGC	s	T	0	REPEAT	*** WARNING >100 Genome Hits ***	37	5	0	0	0.00171353	0.073078
GATCCTGTCACCCAGGT	s	T	0	REPEAT	*** WARNING >100 Genome Hits ***	8	1	37	18	0.031816	0.22717
GATCCCAGGAGTTTGAG	s	T	0	REPEAT	*** WARNING >100 Genome Hits ***	38	7	15	3	0.0752627	0.43323
GATCCCCCTGCCTCGGC	s	T	0	REPEAT	*** WARNING >100 Genome Hits ***	0	0	39	38	0.000451822	0.0725022
GATCTCCTGAGGGCTGT	s	T	0	REPEAT	*** WARNING >100 Genome Hits ***	3	3	39	12	0.00203172	0.119474
GATCCTGCCACTGTACT	s	T	0	REPEAT	*** WARNING >100 Genome Hits ***	15	8	39	3	0.0842235	0.429255
GATCACCGGAGGTCAGG	s	T	0	REPEAT	*** WARNING >100 Genome Hits ***	40	38	0	0	0.00105553	0.0699457
GATCCACCCACCTCGGT	s	T	0	REPEAT	*** WARNING >100 Genome Hits ***	41	43	0	0	0.000651958	0.0699457
GATCGTGCCACTGCAGT	s	T	0	REPEAT	*** WARNING >100 Genome Hits ***	41	3	0	0	0.000651958	0.0699457
GATCCCCAGTGTTGGAG	s	T	0	REPEAT	*** WARNING >100 Genome Hits ***	41	7	4	4	0.00267883	0.129652
GATCGCGCCACTGCTCT	s	T	0	REPEAT	*** WARNING >100 Genome Hits ***	43	42	0	0	0.000651958	0.0620318
GATCCACCTGCCTCATC	s	T	0	REPEAT	*** WARNING >100 Genome Hits ***	0	0	43	3	0.000248529	0.0696973
GATCCTAAAAGCAGCAA	s	T	0	REPEAT	*** WARNING >100 Genome Hits ***	43	5	4	0	0.00267883	0.121995
GATCCCATTTGTCAATT	s	T	0	REPEAT	*** WARNING >100 Genome Hits ***	5	5	43	3	0.00389359	0.128427
GATCACCTGTGGTCAGG	s	T	0	REPEAT	*** WARNING >100 Genome Hits ***	45	10	0	0	0.000403622	0.0602665
GATCCACTTGCCTCAGC	s	T	0	REPEAT	*** WARNING >100 Genome Hits ***	27	6	45	25	0.251532	0.746581
GATCCTTGAGCCCAGGA	s	T	0	REPEAT	*** WARNING >100 Genome Hits ***	0	0	46	45	0.000137089	0.0620318
GATCGTGCCGTTGCACT	s	T	0	REPEAT	*** WARNING >100 Genome Hits ***	0	0	46	48	0.000137089	0.0620318
GATCCTCCCTCCTTGGC	s	T	0	REPEAT	*** WARNING >100 Genome Hits ***	46	9	26	4	0.203028	0.654358
GATCCAGTCACCTCCCA	s	T	0	REPEAT	*** WARNING >100 Genome Hits ***	32	6	46	3	0.370531	0.816716
GATCCTGGGAGGCAGAG	s	T	0	REPEAT	*** WARNING >100 Genome Hits ***	46	12	41	8	0.74854	0.85641
GATCGCGCCATTGTACT	s	T	0	REPEAT	*** WARNING >100 Genome Hits ***	48	46	0	0	0.000250387	0.0512997
GATCGTGCCATTGCATT	s	T	0	REPEAT	*** WARNING >100 Genome Hits ***	0	0	48	47	0.000137089	0.0602665
GATCATGCCACTGGACT	s	T	0	REPEAT	*** WARNING >100 Genome Hits ***	0	0	50	51	7.58015e-05	0.0512997
GATCACCTGAAGTTGGG	s	T	0	REPEAT	*** WARNING >100 Genome Hits ***	38	23	50	4	0.497264	0.826972
GATCCCAGGAGTTCAAG	s	T	0	REPEAT	*** WARNING >100 Genome Hits ***	51	3	43	18	0.645231	0.84676
GATCCGCCTGCCTCAGT	s	T	0	REPEAT	*** WARNING >100 Genome Hits ***	53	19	0	0	0.000155606	0.0435195
GATCATCTGAGGTCGGG	s	T	0	REPEAT	*** WARNING >100 Genome Hits ***	0	0	54	12	4.2002e-05	0.043986
GATCCCACCATTGCACT	s	T	0	REPEAT	*** WARNING >100 Genome Hits ***	55	16	45	46	0.530025	0.83112
GATCATGGCACTGCACT	s	T	0	REPEAT	*** WARNING >100 Genome Hits ***	56	8	0	0	9.68567e-05	0.0406889
GATCTGATGGGTTTATC	s	T	0	REPEAT	*** WARNING >100 Genome Hits ***	0	0	56	2	4.2002e-05	0.043986
GATCGCCTGAGCCTGGG	s	T	0	REPEAT	*** WARNING >100 Genome Hits ***	0	0	56	28	4.2002e-05	0.043986
GATCCAGCAATTCCACT	s	T	0	REPEAT	*** WARNING >100 Genome Hits ***	0	0	56	10	4.2002e-05	0.043986
GATCGTGCTACTGCACT	s	T	0	REPEAT	*** WARNING >100 Genome Hits ***	18	18	56	57	0.0261441	0.229656
GATCCTCCCACTTCAAC	s	T	0	REPEAT	*** WARNING >100 Genome Hits ***	32	7	56	20	0.199848	0.675964
GATCCAATCACCTCCCA	s	T	0	REPEAT	*** WARNING >100 Genome Hits ***	56	9	52	3	0.820077	0.860725
GATCATGAGGTCAGGGG	s	T	0	REPEAT	*** WARNING >100 Genome Hits ***	0	0	58	59	2.33168e-05	0.0406889
GATCATGCCACTGCACA	s	T	0	REPEAT	*** WARNING >100 Genome Hits ***	0	0	59	61	2.33168e-05	0.0406889
GATCATGTCACTGCATT	s	T	0	REPEAT	*** WARNING >100 Genome Hits ***	0	0	59	17	2.33168e-05	0.0406889
GATCTTCTTCCCCTTCT	s	T	0	REPEAT	*** WARNING >100 Genome Hits ***	7	4	59	13	0.000395706	0.0919382
GATCGTGCTGCTGCACT	s	T	0	REPEAT	*** WARNING >100 Genome Hits ***	61	26	0	0	3.76817e-05	0.0388462
GATCCAGCCATCCCATT	s	T	0	REPEAT	*** WARNING >100 Genome Hits ***	61	17	9	10	0.00161279	0.0918619
GATCATGCTACTGTACT	s	T	0	REPEAT	*** WARNING >100 Genome Hits ***	63	1	0	0	3.76817e-05	0.0343782
GATCATGAGTTCAGGAG	s	T	0	REPEAT	*** WARNING >100 Genome Hits ***	0	0	63	10	1.29653e-05	0.0388462
GATCCACTGGGTGAAGC	s	T	0	REPEAT	*** WARNING >100 Genome Hits ***	22	12	63	25	0.0203832	0.234318
GATCAGCCTAGGCAACA	s	T	0	REPEAT	*** WARNING >100 Genome Hits ***	63	6	45	12	0.343631	0.754772
GATCCTCCTGCTTCAGC	s	T	0	REPEAT	*** WARNING >100 Genome Hits ***	65	1	0	0	2.35457e-05	0.0343782
GATCACACCACTGCCCT	s	T	0	REPEAT	*** WARNING >100 Genome Hits ***	66	69	0	0	2.35457e-05	0.0343782
GATCCTGGGAGGTGGAG	s	T	0	REPEAT	*** WARNING >100 Genome Hits ***	40	15	67	13	0.160215	0.653352
GATCCTGGGAGGCGGAG	s	T	0	REPEAT	*** WARNING >100 Genome Hits ***	65	2	67	6	0.983461	0.873698
GATCATCTGAGCCTGGG	s	T	0	REPEAT	*** WARNING >100 Genome Hits ***	0	0	71	36	4.02592e-06	0.0343782
GATCATCAGAGAAATGC	s	T	0	REPEAT	*** WARNING >100 Genome Hits ***	41	13	71	10	0.167715	0.625489
GATCAGCTTGGGCAACA	s	T	0	REPEAT	*** WARNING >100 Genome Hits ***	60	4	71	2	0.613014	0.854866
GATCAGCTTGGCCAACA	s	T	0	REPEAT	*** WARNING >100 Genome Hits ***	40	8	72	4	0.0829707	0.607866
GATCGTGGCACTGCACT	s	T	0	REPEAT	*** WARNING >100 Genome Hits ***	78	12	0	0	3.62444e-06	0.0343782
GATCCTCTTGCCTCGGC	s	T	0	REPEAT	*** WARNING >100 Genome Hits ***	0	0	80	15	7.02724e-07	0.0343782
GATCTTGGCTCACCGCA	s	T	0	REPEAT	*** WARNING >100 Genome Hits ***	0	0	80	82	7.02724e-07	0.0343782
GATCAGCCTGGCCAGCA	s	T	0	REPEAT	*** WARNING >100 Genome Hits ***	15	16	80	33	0.000359438	0.0630416
GATCCCGGCTCACTGCA	s	T	0	REPEAT	*** WARNING >100 Genome Hits ***	81	15	0	0	2.27489e-06	0.0343782
GATCCTGACCCTGTGTA	s	T	0	REPEAT	*** WARNING >100 Genome Hits ***	81	15	76	22	0.833378	0.858864
GATCTTGCCACTGCACT	s	T	0	REPEAT	*** WARNING >100 Genome Hits ***	0	0	82	84	7.02724e-07	0.0343782
GATCCTCCCACCTTGGC	s	T	0	REPEAT	*** WARNING >100 Genome Hits ***	83	7	0	0	2.27489e-06	0.0343782
GATCCTCCTGCCTCCGC	s	T	0	REPEAT	*** WARNING >100 Genome Hits ***	0	0	84	82	3.93488e-07	0.0343782
GATCCACCCACTTCGGC	s	T	0	REPEAT	*** WARNING >100 Genome Hits ***	0	0	84	8	3.93488e-07	0.0343782
GATCACTCGCGGTTAGG	s	T	0	REPEAT	*** WARNING >100 Genome Hits ***	86	10	0	0	1.42884e-06	0.0343782
GATCCTTGAGGAATTGC	s	T	0	REPEAT	*** WARNING >100 Genome Hits ***	88	5	0	0	8.98015e-07	0.0343782
GATCCTCCCGCCTTGGT	s	T	0	REPEAT	*** WARNING >100 Genome Hits ***	91	25	9	9	2.85243e-05	0.0343782
GATCATGAGGTCGGGAG	s	T	0	REPEAT	*** WARNING >100 Genome Hits ***	95	35	32	32	0.00368511	0.107055
GATCATGCCATTGTACT	s	T	0	REPEAT	*** WARNING >100 Genome Hits ***	96	7	0	0	3.55346e-07	0.0343782
GATCGTGCCACTGGACT	s	T	0	REPEAT	*** WARNING >100 Genome Hits ***	0	0	97	2	6.94123e-08	0.0343782
GATCATGCCAGTGCACT	s	T	0	REPEAT	*** WARNING >100 Genome Hits ***	0	0	98	14	3.89833e-08	0.0343782
GATCCACCTGCCTCGGG	s	T	0	REPEAT	*** WARNING >100 Genome Hits ***	0	0	106	25	1.23182e-08	0.0343782
GATCCGCCCACCTTGGT	s	T	0	REPEAT	*** WARNING >100 Genome Hits ***	0	0	108	31	1.23182e-08	0.0343782
GATCATGCCACTACACT	s	T	0	REPEAT	*** WARNING >100 Genome Hits ***	108	6	0	0	5.59789e-08	0.0343782
GATCCCAGGAGGTGGAG	s	T	0	REPEAT	*** WARNING >100 Genome Hits ***	0	0	108	21	1.23182e-08	0.0343782
GATCCTGTCACTGCACT	s	T	0	REPEAT	*** WARNING >100 Genome Hits ***	5	5	113	45	7.52866e-08	0.0343782
GATCCCTGAGGAATCGC	s	T	0	REPEAT	*** WARNING >100 Genome Hits ***	81	2	115	3	0.221426	0.673453
GATCATGCCACCACACT	s	T	0	REPEAT	*** WARNING >100 Genome Hits ***	118	10	0	0	1.40596e-08	0.0343782
GATCCCGGGAGGTGGAG	s	T	0	REPEAT	*** WARNING >100 Genome Hits ***	0	0	121	10	1.23759e-09	0.0343782
GATCCTCCTGCCTCAGT	s	T	0	REPEAT	*** WARNING >100 Genome Hits ***	121	53	0	0	8.87714e-09	0.0343782
GATCATGCCATTGCGCT	s	T	0	REPEAT	*** WARNING >100 Genome Hits ***	23	24	124	20	4.59809e-06	0.0343782
GATCCTAGCACTTTGGG	s	T	0	REPEAT	*** WARNING >100 Genome Hits ***	38	13	132	12	0.000114259	0.0505712
GATCCACCTGCCTCACC	s	T	0	REPEAT	*** WARNING >100 Genome Hits ***	133	21	0	0	2.23871e-09	0.0343782
GATCATGCCAATGCACT	s	T	0	REPEAT	*** WARNING >100 Genome Hits ***	0	0	136	20	1.25182e-10	0.0343782
GATCCTCCATATGCTGA	s	T	0	REPEAT	*** WARNING >100 Genome Hits ***	33	1	141	0	9.1511e-06	0.0343782
GATCTGCCCACCTCCGC	s	T	0	REPEAT	*** WARNING >100 Genome Hits ***	0	0	143	2	3.98968e-11	0.0343782
GATCCTCCTGCCTTGGT	s	T	0	REPEAT	*** WARNING >100 Genome Hits ***	23	22	149	0	1.93569e-07	0.0343782
GATCCTGCCATTGCACT	s	T	0	REPEAT	*** WARNING >100 Genome Hits ***	134	4	149	48	0.693999	0.856548
GATCCACCCGCCTTGGT	s	T	0	REPEAT	*** WARNING >100 Genome Hits ***	151	21	78	2	0.00931761	0.163582
GATCCACCCGCTTCAGC	s	T	0	REPEAT	*** WARNING >100 Genome Hits ***	0	0	152	19	1.27309e-11	0.0343782
GATCAGCCTGGGCAGCA	s	T	0	REPEAT	*** WARNING >100 Genome Hits ***	41	7	158	73	9.21183e-06	0.0343782
GATCCGCCTGCCTTGGT	s	T	0	REPEAT	*** WARNING >100 Genome Hits ***	166	63	0	0	2.30695e-11	0.0343782
GATCCACCTGCCTTGGT	s	T	0	REPEAT	*** WARNING >100 Genome Hits ***	166	7	124	8	0.216971	0.622664
GATCCACCCGCGTTGGC	s	T	0	REPEAT	*** WARNING >100 Genome Hits ***	0	0	167	163	1.30052e-12	0.0343782
GATCCACCCACCTCGGG	s	T	0	REPEAT	*** WARNING >100 Genome Hits ***	169	3	0	0	1.46165e-11	0.0343782
GATCCACCTGCCTCGGT	s	T	0	REPEAT	*** WARNING >100 Genome Hits ***	169	13	167	8	0.949049	0.86072
GATCCACCTGCCTTGCC	s	T	0	REPEAT	*** WARNING >100 Genome Hits ***	173	63	89	87	0.00636858	0.123453
GATCCACCCACCTTGCC	s	T	0	REPEAT	*** WARNING >100 Genome Hits ***	176	10	0	0	5.87064e-12	0.0343782
GATCATGAGGTGAGGAG	s	T	0	REPEAT	*** WARNING >100 Genome Hits ***	45	7	176	35	1.87597e-06	0.0343782
GATCATGCCACTGTGCT	s	T	0	REPEAT	*** WARNING >100 Genome Hits ***	159	24	180	16	0.513084	0.843243
GATCGTACCACTGCACT	s	T	0	REPEAT	*** WARNING >100 Genome Hits ***	183	16	0	0	2.35945e-12	0.0343782
GATCGTGCCAGTGCACT	s	T	0	REPEAT	*** WARNING >100 Genome Hits ***	0	0	186	59	7.54952e-14	0.0343782
GATCACCTGAAGTCAGG	s	T	0	REPEAT	*** WARNING >100 Genome Hits ***	191	19	0	0	6.01963e-13	0.0343782
GATCATGTCCTTTGCAG	s	T	0	REPEAT	*** WARNING >100 Genome Hits ***	181	24	193	3	0.772111	0.860731
GATCTGCCTGCCTCGGT	s	T	0	REPEAT	*** WARNING >100 Genome Hits ***	198	47	0	0	2.42251e-13	0.0343782
GATCATGGCTCACTGCA	s	T	0	REPEAT	*** WARNING >100 Genome Hits ***	161	8	201	42	0.287939	0.754436
GATCACCTGAGCCCGGG	s	T	0	REPEAT	*** WARNING >100 Genome Hits ***	183	11	201	21	0.624435	0.857726
GATCATACCACTGCACT	s	T	0	REPEAT	*** WARNING >100 Genome Hits ***	206	32	0	0	9.74776e-14	0.0343782
GATCCACCCGCCTTGCC	s	T	0	REPEAT	*** WARNING >100 Genome Hits ***	0	0	208	77	2.44249e-15	0.0343782
GATCATGCTGCTGCACT	s	T	0	REPEAT	*** WARNING >100 Genome Hits ***	211	13	0	0	3.93019e-14	0.0343782
GATCCTCCTGCCTTGCC	s	T	0	REPEAT	*** WARNING >100 Genome Hits ***	214	27	0	0	2.4869e-14	0.0343782
GATCATCTGAGGTCAGG	s	T	0	REPEAT	*** WARNING >100 Genome Hits ***	0	0	219	16	4.44089e-16	0.0343782
GATCAGCCTGACCAACA	s	T	0	REPEAT	*** WARNING >100 Genome Hits ***	214	4	219	43	0.932426	0.881655
GATCCGCCCGCCTCCGC	s	T	0	REPEAT	*** WARNING >100 Genome Hits ***	33	8	238	58	1.29463e-11	0.0343782
GATCCTGGCTCACTGCA	s	T	0	REPEAT	*** WARNING >100 Genome Hits ***	0	0	241	20	0	0.0343782
GATCGTGCCACTGTGCT	s	T	0	REPEAT	*** WARNING >100 Genome Hits ***	101	2	251	33	1.84675e-05	0.0388462
GATCCACCTGCCTCCGC	s	T	0	REPEAT	*** WARNING >100 Genome Hits ***	0	0	258	63	0	0.0343782
GATCGCGCCACTGCCCT	s	T	0	REPEAT	*** WARNING >100 Genome Hits ***	259	17	0	0	0	0.0343782
GATCCTCCCACCTTAAC	s	T	0	REPEAT	*** WARNING >100 Genome Hits ***	0	0	273	129	0	0.0343782
GATCGTGCCATTGCCCT	s	T	0	REPEAT	*** WARNING >100 Genome Hits ***	18	18	278	60	2.22045e-16	0.0343782
GATCCTCCCGCCTCAGC	s	T	0	REPEAT	*** WARNING >100 Genome Hits ***	292	18	95	19	1.81472e-07	0.0343782
GATCAGGCCACTGCACT	s	T	0	REPEAT	*** WARNING >100 Genome Hits ***	0	0	299	103	0	0.0343782
GATCACCTGAGGTCCGG	s	T	0	REPEAT	*** WARNING >100 Genome Hits ***	0	0	312	319	0	0.0343782
GATCATCCTGGCTAACA	s	T	0	REPEAT	*** WARNING >100 Genome Hits ***	261	22	319	41	0.205403	0.734597
GATCCGCCCGCCTCGCC	s	T	0	REPEAT	*** WARNING >100 Genome Hits ***	324	84	0	0	0	0.0343782
GATCGTGCCACTGCTCT	s	T	0	REPEAT	*** WARNING >100 Genome Hits ***	337	72	0	0	0	0.0343782
GATCCTCCTGCCCCAGC	s	T	0	REPEAT	*** WARNING >100 Genome Hits ***	27	1	345	66	0	0.0343782
GATCTGCCCGCCTTGGC	s	T	0	REPEAT	*** WARNING >100 Genome Hits ***	349	33	351	343	0.932385	0.861012
GATCCACCCACCTCCGC	s	T	0	REPEAT	*** WARNING >100 Genome Hits ***	25	13	353	116	0	0.0343782
GATCCAGCAATCCCACT	s	T	0	REPEAT	*** WARNING >100 Genome Hits ***	181	45	386	20	4.23331e-06	0.0343782
GATCATGCCATTGCTCT	s	T	0	REPEAT	*** WARNING >100 Genome Hits ***	0	0	408	210	0	0.0343782
GATCTGCCTGCCTTGGT	s	T	0	REPEAT	*** WARNING >100 Genome Hits ***	408	149	0	0	0	0.0343782
GATCCCACCACTGCACT	s	T	0	REPEAT	*** WARNING >100 Genome Hits ***	349	13	421	49	0.150078	0.689972
GATCATGCCACTGTACT	s	T	0	REPEAT	*** WARNING >100 Genome Hits ***	435	44	416	10	0.728827	0.835374
GATCCCAGGAGGCGGAG	s	T	0	REPEAT	*** WARNING >100 Genome Hits ***	231	4	485	9	3.30857e-07	0.0343782
GATCACCTGAGATCAGG	s	T	0	REPEAT	*** WARNING >100 Genome Hits ***	0	0	492	39	0	0.0343782
GATCACCTGAGCTCGGG	s	T	0	REPEAT	*** WARNING >100 Genome Hits ***	327	42	501	193	0.00130202	0.12068
GATCCACCCGCCTCCGC	s	T	0	REPEAT	*** WARNING >100 Genome Hits ***	0	0	525	18	0	0.0343782
GATCCGCCTGCCTTGGC	s	T	0	REPEAT	*** WARNING >100 Genome Hits ***	488	6	529	216	0.471598	0.851318
GATCGGGCCACTGCACT	s	T	0	REPEAT	*** WARNING >100 Genome Hits ***	0	0	531	183	0	0.0343782
GATCCACCCACCTTGGC	s	T	0	REPEAT	*** WARNING >100 Genome Hits ***	179	30	570	275	8.88178e-15	0.0343782
GATCACCTGAGTTCAGG	s	T	0	REPEAT	*** WARNING >100 Genome Hits ***	656	104	0	0	0	0.0343782
GATCGTGCCACTGCGCT	s	T	0	REPEAT	*** WARNING >100 Genome Hits ***	373	46	676	96	6.10749e-07	0.0343782
GATCCGCCCGCCTTGGC	s	T	0	REPEAT	*** WARNING >100 Genome Hits ***	214	223	683	159	0	0.0343782
GATCACCTGAGCCTGGG	s	T	0	REPEAT	*** WARNING >100 Genome Hits ***	299	15	717	39	1.47815e-12	0.0343782
GATCATGCCACTGCGCT	s	T	0	REPEAT	*** WARNING >100 Genome Hits ***	206	22	720	106	0	0.0343782
GATCCCAGCACTTTGGG	s	T	0	REPEAT	*** WARNING >100 Genome Hits ***	734	79	594	61	0.0417365	0.227782
GATCCTCCTGCCTCAGC	s	T	0	REPEAT	*** WARNING >100 Genome Hits ***	802	16	806	67	0.973923	0.860007
GATCCACCCGCCTTGGC	s	T	0	REPEAT	*** WARNING >100 Genome Hits ***	398	11	878	271	3.7903e-13	0.0343782
GATCCTGCCACTGCACT	s	T	0	REPEAT	*** WARNING >100 Genome Hits ***	692	23	882	48	0.0104549	0.235096
GATCACCTGAGCTCAGG	s	T	0	REPEAT	*** WARNING >100 Genome Hits ***	993	369	1097	696	0.21301	0.779757
GATCATGCCACTGCCCT	s	T	0	REPEAT	*** WARNING >100 Genome Hits ***	186	36	1140	516	0	0.0343782
GATCGTGCCACTGTACT	s	T	0	REPEAT	*** WARNING >100 Genome Hits ***	455	48	1194	205	0	0.0343782
GATCACTTGAGCCCTGG	s	T	0	REPEAT	*** WARNING >100 Genome Hits ***	0	0	1314	1346	0	0.0343782
GATCCCGCCACTGCACT	s	T	0	REPEAT	*** WARNING >100 Genome Hits ***	818	46	1361	364	4.30219e-10	0.0343782
GATCATGAGGTCAGGAG	s	T	0	REPEAT	*** WARNING >100 Genome Hits ***	1363	6	1027	813	0.000264311	0.0406889
GATCCACCTGCCTTGGC	s	T	0	REPEAT	*** WARNING >100 Genome Hits ***	878	20	1463	349	9.44482e-11	0.0343782
GATCACCTGAGTTCGGG	s	T	0	REPEAT	*** WARNING >100 Genome Hits ***	1558	114	0	0	0	0.0343782
GATCGTGCCACTGCCCT	s	T	0	REPEAT	*** WARNING >100 Genome Hits ***	322	7	2484	1068	0	0.0343782
GATCATGCCATTGCACT	s	T	0	REPEAT	*** WARNING >100 Genome Hits ***	2674	244	2627	601	0.73305	0.777602
GATCTTGGCTCACTGCA	s	T	0	REPEAT	*** WARNING >100 Genome Hits ***	2020	49	2770	75	6.7027e-09	0.0343782
GATCGCGCCATTGCACT	s	T	0	REPEAT	*** WARNING >100 Genome Hits ***	1724	242	3117	628	0	0.0343782
GATCACACCACTGCACT	s	T	0	REPEAT	*** WARNING >100 Genome Hits ***	4415	306	2893	126	0	0.0343782
GATCACGCCACTGCACT	s	T	0	REPEAT	*** WARNING >100 Genome Hits ***	5744	538	7252	2590	1.35136e-12	0.0343782
GATCGTGCCATTGCACT	s	T	0	REPEAT	*** WARNING >100 Genome Hits ***	5776	69	8650	1417	0	0.0343782
GATCACCTGAGGTCGGG	s	T	0	REPEAT	*** WARNING >100 Genome Hits ***	5409	187	10288	3070	0	0.0343782
GATCATGCCACTGCACT	s	T	0	REPEAT	*** WARNING >100 Genome Hits ***	11759	381	19262	2142	0	0.0343782
GATCGCGCCACTGCACT	s	T	0	REPEAT	*** WARNING >100 Genome Hits ***	11157	623	21139	4164	0	0.0343782
GATCGTGCCACTGCACT	s	T	0	REPEAT	*** WARNING >100 Genome Hits ***	27358	1101	45253	4548	0	0.0343782
GATCTCGTGAGACTCAT	s	Th	0	REPEAT	*** WARNING >100 Genome Hits ***	5	2	0	0	0.167517	0.678357
GATCAAATTACTCTGAG	s	Th	0	REPEAT	*** WARNING >100 Genome Hits ***	5	5	0	0	0.167517	0.678357
GATCGTGTCACTGTACT	s	Th	0	REPEAT	*** WARNING >100 Genome Hits ***	5	5	0	0	0.167517	0.678357
GATCAGGGTGAGGAACA	s	Th	0	REPEAT	*** WARNING >100 Genome Hits ***	5	5	0	0	0.167517	0.678357
GATCTCGTGAGAACTCA	s	Th	0	REPEAT	*** WARNING >100 Genome Hits ***	5	5	0	0	0.167517	0.678357
GATCGAATCGGCTACTG	s	Th	0	REPEAT	*** WARNING >100 Genome Hits ***	5	2	0	0	0.167517	0.678357
GATCAGGGTGGTGGTTG	s	Th	0	REPEAT	*** WARNING >100 Genome Hits ***	5	5	0	0	0.167517	0.678357
GATCTCACTCTGTTGTC	s	Th	0	REPEAT	*** WARNING >100 Genome Hits ***	5	5	0	0	0.167517	0.678357
GATCAATCAGAGGAAAG	s	Th	0	REPEAT	*** WARNING >100 Genome Hits ***	5	2	0	0	0.167517	0.678357
GATCACAGGCATGAACC	s	Th	0	REPEAT	*** WARNING >100 Genome Hits ***	0	0	5	5	0.147326	0.686951
GATCCGCCTGTCTCGGC	s	Th	0	REPEAT	*** WARNING >100 Genome Hits ***	0	0	5	5	0.147326	0.686951
GATCACAAGGTCAGGCG	s	Th	0	REPEAT	*** WARNING >100 Genome Hits ***	0	0	5	5	0.147326	0.686951
GATCACCTGAAGTTAGG	s	Th	0	REPEAT	*** WARNING >100 Genome Hits ***	0	0	5	5	0.147326	0.686951
GATCAGATGGATTCACA	s	Th	0	REPEAT	*** WARNING >100 Genome Hits ***	2	2	5	1	0.535479	0.848303
GATCTCGCTCTGTCACC	s	Th	0	REPEAT	*** WARNING >100 Genome Hits ***	5	5	3	3	0.592387	0.844415
GATCAGGAACAAGGCAA	s	Th	0	REPEAT	*** WARNING >100 Genome Hits ***	5	5	5	5	0.961189	0.883973
GATCTCGGCTCATTGCA	s	Th	0	REPEAT	*** WARNING >100 Genome Hits ***	6	6	0	0	0.167517	0.678357
GATCTGCCCACTTTGGC	s	Th	0	REPEAT	*** WARNING >100 Genome Hits ***	6	6	0	0	0.167517	0.678357
GATCATTGGGTCAACAA	s	Th	0	REPEAT	*** WARNING >100 Genome Hits ***	6	6	0	0	0.167517	0.678357
GATCTCAGCTCGCTGCA	s	Th	0	REPEAT	*** WARNING >100 Genome Hits ***	6	6	0	0	0.167517	0.678357
GATCATAGCTCACCACA	s	Th	0	REPEAT	*** WARNING >100 Genome Hits ***	6	6	0	0	0.167517	0.678357
GATCTGCCTGTCTTGGC	s	Th	0	REPEAT	*** WARNING >100 Genome Hits ***	6	6	0	0	0.167517	0.678357
GATCACATGTGGGCTTG	s	Th	0	REPEAT	*** WARNING >100 Genome Hits ***	6	6	0	0	0.167517	0.678357
GATCATTCTTGGGTGTT	s	Th	0	REPEAT	*** WARNING >100 Genome Hits ***	6	6	0	0	0.167517	0.678357
GATCAAGTCAGCTTCAT	s	Th	0	REPEAT	*** WARNING >100 Genome Hits ***	6	0	0	0	0.167517	0.678357
GATCTCACCCTGCCTCC	s	Th	0	REPEAT	*** WARNING >100 Genome Hits ***	6	3	0	0	0.167517	0.678357
GATCTCATTGTTCAATT	s	Th	0	REPEAT	*** WARNING >100 Genome Hits ***	6	6	0	0	0.167517	0.678357
GATCAAGTGATTCTCCT	s	Th	0	REPEAT	*** WARNING >100 Genome Hits ***	6	0	5	1	0.961189	0.883973
GATCACGGGGTCAGGAG	s	Th	0	REPEAT	*** WARNING >100 Genome Hits ***	0	0	7	7	0.147326	0.636774
GATCACAGCTCATTGCA	s	Th	0	REPEAT	*** WARNING >100 Genome Hits ***	0	0	7	6	0.147326	0.636774
GATCTGTCACCCAGGCT	s	Th	0	REPEAT	*** WARNING >100 Genome Hits ***	0	0	7	6	0.147326	0.636774
GATCTCACTCTGTCACC	s	Th	0	REPEAT	*** WARNING >100 Genome Hits ***	0	0	7	1	0.147326	0.636774
GATCTGCCTTCCTTGGC	s	Th	0	REPEAT	*** WARNING >100 Genome Hits ***	0	0	7	7	0.147326	0.636774
GATCAGATTGTTACTGT	s	Th	0	REPEAT	*** WARNING >100 Genome Hits ***	3	0	7	6	0.535479	0.792038
GATCTCTTGACCTCGTG	s	Th	0	REPEAT	*** WARNING >100 Genome Hits ***	3	3	7	6	0.535479	0.792038
GATCTATATCTCTGTTT	s	Th	0	REPEAT	*** WARNING >100 Genome Hits ***	5	1	7	1	0.961189	0.85689
GATCTCATGAGACTTAT	s	Th	0	REPEAT	*** WARNING >100 Genome Hits ***	8	8	0	0	0.0909465	0.618326
GATCTGCTTGCCTCGGC	s	Th	0	REPEAT	*** WARNING >100 Genome Hits ***	8	8	0	0	0.0909465	0.618326
GATCCACTTGCCTTGGC	s	Th	0	REPEAT	*** WARNING >100 Genome Hits ***	8	8	0	0	0.0909465	0.618326
GATCACTTGAACCTAGG	s	Th	0	REPEAT	*** WARNING >100 Genome Hits ***	8	1	0	0	0.0909465	0.618326
GATCCCTTCCTTACACC	s	Th	0	REPEAT	*** WARNING >100 Genome Hits ***	8	8	0	0	0.0909465	0.618326
GATCAGGCAGCAACATT	s	Th	0	REPEAT	*** WARNING >100 Genome Hits ***	8	1	0	0	0.0909465	0.618326
GATCACGAGGTGAAGAG	s	Th	0	REPEAT	*** WARNING >100 Genome Hits ***	8	1	0	0	0.0909465	0.618326
GATCATTTGAGACCAGG	s	Th	0	REPEAT	*** WARNING >100 Genome Hits ***	0	0	8	8	0.0759457	0.636774
GATCATCTGAGCCTTCA	s	Th	0	REPEAT	*** WARNING >100 Genome Hits ***	0	0	8	8	0.0759457	0.636774
GATCACTTGAACCTGGA	s	Th	0	REPEAT	*** WARNING >100 Genome Hits ***	0	0	8	9	0.0759457	0.636774
GATCGGGAGTTCAAGAC	s	Th	0	REPEAT	*** WARNING >100 Genome Hits ***	0	0	8	9	0.0759457	0.636774
GATCCACCGGCCTTGGC	s	Th	0	REPEAT	*** WARNING >100 Genome Hits ***	0	0	8	8	0.0759457	0.636774
GATCAAGACCATGCTGG	s	Th	0	REPEAT	*** WARNING >100 Genome Hits ***	0	0	8	9	0.0759457	0.636774
GATCATTTGAGCTCAGG	s	Th	0	REPEAT	*** WARNING >100 Genome Hits ***	0	0	8	9	0.0759457	0.636774
GATCACTGGTTGGTTCA	s	Th	0	REPEAT	*** WARNING >100 Genome Hits ***	0	0	8	1	0.0759457	0.636774
GATCCTCCTGCTTTGGC	s	Th	0	REPEAT	*** WARNING >100 Genome Hits ***	0	0	8	9	0.0759457	0.636774
GATCCGCCCATCTTGGC	s	Th	0	REPEAT	*** WARNING >100 Genome Hits ***	0	0	8	8	0.0759457	0.636774
GATCACTTCAGCCTGGG	s	Th	0	REPEAT	*** WARNING >100 Genome Hits ***	2	2	8	9	0.294196	0.792038
GATCAAACTGCAAGGCG	s	Th	0	REPEAT	*** WARNING >100 Genome Hits ***	8	4	3	3	0.341281	0.779415
GATCTTGGCTCAGTGCA	s	Th	0	REPEAT	*** WARNING >100 Genome Hits ***	5	5	8	9	0.615841	0.85689
GATCCGCCTGCTTCGGC	s	Th	0	REPEAT	*** WARNING >100 Genome Hits ***	9	9	0	0	0.0909465	0.433224
GATCACTTGAGCCTAGA	s	Th	0	REPEAT	*** WARNING >100 Genome Hits ***	9	9	0	0	0.0909465	0.433224
GATCACTTGAACTCAGG	s	Th	0	REPEAT	*** WARNING >100 Genome Hits ***	9	0	0	0	0.0909465	0.433224
GATCCCACTTGTCAATT	s	Th	0	REPEAT	*** WARNING >100 Genome Hits ***	9	3	0	0	0.0909465	0.433224
GATCAAAAGGTCAGGAG	s	Th	0	REPEAT	*** WARNING >100 Genome Hits ***	9	9	0	0	0.0909465	0.433224
GATCAACATGGAGAAAC	s	Th	0	REPEAT	*** WARNING >100 Genome Hits ***	9	10	0	0	0.0909465	0.433224
GATCAGCCTGGGCAATA	s	Th	0	REPEAT	*** WARNING >100 Genome Hits ***	9	9	0	0	0.0909465	0.433224
GATCACTTGAGACCAAG	s	Th	0	REPEAT	*** WARNING >100 Genome Hits ***	9	9	0	0	0.0909465	0.433224
GATCTCAAACTTCTGAC	s	Th	0	REPEAT	*** WARNING >100 Genome Hits ***	9	3	0	0	0.0909465	0.433224
GATCTCTCGGCAGAAAC	s	Th	0	REPEAT	*** WARNING >100 Genome Hits ***	9	10	0	0	0.0909465	0.433224
GATCCAGTCATCTCCCA	s	Th	0	REPEAT	*** WARNING >100 Genome Hits ***	0	0	10	11	0.0759457	0.594545
GATCACATGGTCAGGAG	s	Th	0	REPEAT	*** WARNING >100 Genome Hits ***	0	0	10	11	0.0759457	0.594545
GATCACTGCAAGCTCCG	s	Th	0	REPEAT	*** WARNING >100 Genome Hits ***	0	0	10	11	0.0759457	0.594545
GATCGCTTGAGCTTAGG	s	Th	0	REPEAT	*** WARNING >100 Genome Hits ***	0	0	10	3	0.0759457	0.594545
GATCCGCCTGTCTTGGC	s	Th	0	REPEAT	*** WARNING >100 Genome Hits ***	0	0	10	9	0.0759457	0.594545
GATCTGCCTGCCTCAGA	s	Th	0	REPEAT	*** WARNING >100 Genome Hits ***	0	0	10	3	0.0759457	0.594545
GATCCCAGGAGGTCAAG	s	Th	0	REPEAT	*** WARNING >100 Genome Hits ***	0	0	10	9	0.0759457	0.594545
GATCAAATGGTAGTTCT	s	Th	0	REPEAT	*** WARNING >100 Genome Hits ***	2	2	10	11	0.294196	0.734393
GATCTACCAAGCCAATG	s	Th	0	REPEAT	*** WARNING >100 Genome Hits ***	2	2	10	3	0.294196	0.734393
GATCACTGCAGCCTCCA	s	Th	0	REPEAT	*** WARNING >100 Genome Hits ***	11	11	0	0	0.0509456	0.433224
GATCTGTCTGCCTCGGC	s	Th	0	REPEAT	*** WARNING >100 Genome Hits ***	11	11	0	0	0.0509456	0.433224
GATCGCTTGAGCTCAAG	s	Th	0	REPEAT	*** WARNING >100 Genome Hits ***	11	11	0	0	0.0509456	0.433224
GATCAAACTGCAAGGCA	s	Th	0	REPEAT	*** WARNING >100 Genome Hits ***	11	11	0	0	0.0509456	0.433224
GATCACTTGAAACCAGG	s	Th	0	REPEAT	*** WARNING >100 Genome Hits ***	11	1	0	0	0.0509456	0.433224
GATCAGGCAGCAGCATT	s	Th	0	REPEAT	*** WARNING >100 Genome Hits ***	11	2	0	0	0.0509456	0.433224
GATCACTGCAACCTCTG	s	Th	0	REPEAT	*** WARNING >100 Genome Hits ***	11	7	0	0	0.0509456	0.433224
GATCACTTGAGTCAGGA	s	Th	0	REPEAT	*** WARNING >100 Genome Hits ***	0	0	11	12	0.0404366	0.594545
GATCACTGCAGCCTTGA	s	Th	0	REPEAT	*** WARNING >100 Genome Hits ***	0	0	11	1	0.0404366	0.594545
GATCACCTGAGGCTGGG	s	Th	0	REPEAT	*** WARNING >100 Genome Hits ***	0	0	11	12	0.0404366	0.594545
GATCAGCAAAATTGATA	s	Th	0	REPEAT	*** WARNING >100 Genome Hits ***	0	0	11	12	0.0404366	0.594545
GATCATTTCAACTGATG	s	Th	0	REPEAT	*** WARNING >100 Genome Hits ***	0	0	11	1	0.0404366	0.594545
GATCTCGCCCTGCCTCC	s	Th	0	REPEAT	*** WARNING >100 Genome Hits ***	6	6	11	1	0.380845	0.820362
GATCTCTGTTCACTGCA	s	Th	0	REPEAT	*** WARNING >100 Genome Hits ***	6	6	11	12	0.380845	0.820362
GATCACGAGGTCAGGCA	s	Th	0	REPEAT	*** WARNING >100 Genome Hits ***	6	6	11	3	0.380845	0.820362
GATCACGCCACTGGACT	s	Th	0	REPEAT	*** WARNING >100 Genome Hits ***	12	12	0	0	0.0509456	0.399179
GATCCGCCCTCCTTGGC	s	Th	0	REPEAT	*** WARNING >100 Genome Hits ***	12	4	0	0	0.0509456	0.399179
GATCACAGACATGAGCC	s	Th	0	REPEAT	*** WARNING >100 Genome Hits ***	12	4	0	0	0.0509456	0.399179
GATCTGCTGTTAGTCTG	s	Th	0	REPEAT	*** WARNING >100 Genome Hits ***	12	4	0	0	0.0509456	0.399179
GATCCCACCCCCACAGA	s	Th	0	REPEAT	*** WARNING >100 Genome Hits ***	12	0	0	0	0.0509456	0.399179
GATCTCGGCTCACCACA	s	Th	0	REPEAT	*** WARNING >100 Genome Hits ***	12	12	0	0	0.0509456	0.399179
GATCTCTTTCACTGTCA	s	Th	0	REPEAT	*** WARNING >100 Genome Hits ***	12	3	0	0	0.0509456	0.399179
GATCCACTGTGCCTGGC	s	Th	0	REPEAT	*** WARNING >100 Genome Hits ***	12	3	8	6	0.753745	0.827468
GATCAGCCTGGGCAATG	s	Th	0	REPEAT	*** WARNING >100 Genome Hits ***	0	0	13	14	0.0404366	0.404659
GATCAGGGCTCACTGCA	s	Th	0	REPEAT	*** WARNING >100 Genome Hits ***	0	0	13	14	0.0404366	0.404659
GATCCCTTGAGTCCAGG	s	Th	0	REPEAT	*** WARNING >100 Genome Hits ***	0	0	13	12	0.0404366	0.404659
GATCACCTGAACCTGGG	s	Th	0	REPEAT	*** WARNING >100 Genome Hits ***	11	4	13	4	0.945134	0.860314
GATCCACCGGCCTCAGC	s	Th	0	REPEAT	*** WARNING >100 Genome Hits ***	14	1	0	0	0.0290848	0.372717
GATCTTTCACCTCCTTG	s	Th	0	REPEAT	*** WARNING >100 Genome Hits ***	14	14	0	0	0.0290848	0.372717
GATCCACCTGCGTTGGC	s	Th	0	REPEAT	*** WARNING >100 Genome Hits ***	14	14	0	0	0.0290848	0.372717
GATCACGAGGTCGAGAG	s	Th	0	REPEAT	*** WARNING >100 Genome Hits ***	14	2	0	0	0.0290848	0.372717
GATCTGACAGGAGGCGG	s	Th	0	REPEAT	*** WARNING >100 Genome Hits ***	14	2	0	0	0.0290848	0.372717
GATCACAACTCCTCGCC	s	Th	0	REPEAT	*** WARNING >100 Genome Hits ***	14	5	0	0	0.0290848	0.372717
GATCTTGCTGTGTTGCC	s	Th	0	REPEAT	*** WARNING >100 Genome Hits ***	14	2	3	3	0.115514	0.60077
GATCAAGTCGGCTTCAT	s	Th	0	REPEAT	*** WARNING >100 Genome Hits ***	14	5	7	6	0.284682	0.778147
GATCACACCATTGTACT	s	Th	0	REPEAT	*** WARNING >100 Genome Hits ***	0	0	15	1	0.021955	0.383968
GATCTTGGCTCACTGCG	s	Th	0	REPEAT	*** WARNING >100 Genome Hits ***	0	0	15	14	0.021955	0.383968
GATCAGATGGTTGTAGA	s	Th	0	REPEAT	*** WARNING >100 Genome Hits ***	0	0	15	16	0.021955	0.383968
GATCTTGCAGTGAGCCG	s	Th	0	REPEAT	*** WARNING >100 Genome Hits ***	3	3	15	3	0.0904397	0.606819
GATCATAACTCACTGCA	s	Th	0	REPEAT	*** WARNING >100 Genome Hits ***	16	1	0	0	0.0290848	0.372717
GATCGAGACGATCCTGG	s	Th	0	REPEAT	*** WARNING >100 Genome Hits ***	16	16	0	0	0.0290848	0.372717
GATCTGCCCGTCTCGGC	s	Th	0	REPEAT	*** WARNING >100 Genome Hits ***	16	15	0	0	0.0290848	0.372717
GATCCTGTCTCAGAAAA	s	Th	0	REPEAT	*** WARNING >100 Genome Hits ***	16	4	0	0	0.0290848	0.372717
GATCTCTGTGACCCACA	s	Th	0	REPEAT	*** WARNING >100 Genome Hits ***	16	16	0	0	0.0290848	0.372717
GATCCTCTTGCCTTGGC	s	Th	0	REPEAT	*** WARNING >100 Genome Hits ***	16	3	0	0	0.0290848	0.372717
GATCAGGCCACTGTACT	s	Th	0	REPEAT	*** WARNING >100 Genome Hits ***	0	0	16	15	0.021955	0.383968
GATCCCGCACCGGGGCT	s	Th	0	REPEAT	*** WARNING >100 Genome Hits ***	0	0	16	8	0.021955	0.383968
GATCGCTTGAGCCTGGA	s	Th	0	REPEAT	*** WARNING >100 Genome Hits ***	0	0	16	18	0.021955	0.383968
GATCTCTGCTCACTGCA	s	Th	0	REPEAT	*** WARNING >100 Genome Hits ***	0	0	16	18	0.021955	0.383968
GATCGCTTGGGCCCAGG	s	Th	0	REPEAT	*** WARNING >100 Genome Hits ***	0	0	16	18	0.021955	0.383968
GATCAACGAGACAGAAA	s	Th	0	REPEAT	*** WARNING >100 Genome Hits ***	16	3	3	4	0.115514	0.60077
GATCCTCCTGTCTCGGC	s	Th	0	REPEAT	*** WARNING >100 Genome Hits ***	11	11	16	1	0.684429	0.845399
GATCTCACTGTGTTGCC	s	Th	0	REPEAT	*** WARNING >100 Genome Hits ***	11	4	16	5	0.684429	0.845399
GATCATAGCTCGCTGCA	s	Th	0	REPEAT	*** WARNING >100 Genome Hits ***	17	7	0	0	0.0168196	0.231134
GATCCAAACCAAGATGA	s	Th	0	REPEAT	*** WARNING >100 Genome Hits ***	17	1	0	0	0.0168196	0.231134
GATCACTTGAGGTGAGG	s	Th	0	REPEAT	*** WARNING >100 Genome Hits ***	17	17	0	0	0.0168196	0.231134
GATCACTTGAGGCCAAG	s	Th	0	REPEAT	*** WARNING >100 Genome Hits ***	17	18	0	0	0.0168196	0.231134
GATCTGGAACTCCTGGC	s	Th	0	REPEAT	*** WARNING >100 Genome Hits ***	0	0	18	17	0.0120792	0.238835
GATCACTTGAGCTGAGG	s	Th	0	REPEAT	*** WARNING >100 Genome Hits ***	12	10	18	4	0.477959	0.850127
GATCACGACCCTCTCAC	s	Th	0	REPEAT	*** WARNING >100 Genome Hits ***	19	1	0	0	0.0168196	0.216203
GATCGCTTGAACCTAGG	s	Th	0	REPEAT	*** WARNING >100 Genome Hits ***	19	1	0	0	0.0168196	0.216203
GATCCTCCCACCTCGGC	s	Th	0	REPEAT	*** WARNING >100 Genome Hits ***	19	18	0	0	0.0168196	0.216203
GATCGCACCACTGAACT	s	Th	0	REPEAT	*** WARNING >100 Genome Hits ***	19	18	0	0	0.0168196	0.216203
GATCACTGCAACCTCCG	s	Th	0	REPEAT	*** WARNING >100 Genome Hits ***	19	13	13	12	0.578411	0.804193
GATCAGTGGTTGCCTGG	s	Th	0	REPEAT	*** WARNING >100 Genome Hits ***	20	2	0	0	0.00981802	0.216203
GATCAAGACTCCGTCTC	s	Th	0	REPEAT	*** WARNING >100 Genome Hits ***	20	20	0	0	0.00981802	0.216203
GATCTGCCCGTCTTGGC	s	Th	0	REPEAT	*** WARNING >100 Genome Hits ***	20	4	0	0	0.00981802	0.216203
GATCACTTGAGGCCAGT	s	Th	0	REPEAT	*** WARNING >100 Genome Hits ***	20	20	0	0	0.00981802	0.216203
GATCTCTCTGCAGAAAC	s	Th	0	REPEAT	*** WARNING >100 Genome Hits ***	20	1	0	0	0.00981802	0.216203
GATCCCCCTGCCTTGGC	s	Th	0	REPEAT	*** WARNING >100 Genome Hits ***	20	7	0	0	0.00981802	0.216203
GATCAAGAGATTGAGAC	s	Th	0	REPEAT	*** WARNING >100 Genome Hits ***	0	0	20	2	0.0120792	0.22588
GATCTTGAACTTCCAGC	s	Th	0	REPEAT	*** WARNING >100 Genome Hits ***	0	0	20	18	0.0120792	0.22588
GATCTTGCCATGTTGCC	s	Th	0	REPEAT	*** WARNING >100 Genome Hits ***	0	0	20	5	0.0120792	0.22588
GATCGCTTGAGCTCAGA	s	Th	0	REPEAT	*** WARNING >100 Genome Hits ***	0	0	21	23	0.00670973	0.22588
GATCACATCACAGGACT	s	Th	0	REPEAT	*** WARNING >100 Genome Hits ***	0	0	21	3	0.00670973	0.22588
GATCGCTTAAGCCCAGG	s	Th	0	REPEAT	*** WARNING >100 Genome Hits ***	0	0	21	20	0.00670973	0.22588
GATCTTAGCCAAAAGGC	s	Th	0	REPEAT	*** WARNING >100 Genome Hits ***	6	6	21	13	0.0818301	0.60678
GATCAGAGCAGAACTAA	s	Th	0	REPEAT	*** WARNING >100 Genome Hits ***	20	9	21	23	0.927462	0.866388
GATCGCTTGAGCACAGG	s	Th	0	REPEAT	*** WARNING >100 Genome Hits ***	22	21	0	0	0.00981802	0.173524
GATCAGTTGAGCTCAGG	s	Th	0	REPEAT	*** WARNING >100 Genome Hits ***	22	10	0	0	0.00981802	0.173524
GATCCGTCTGCCTCAGC	s	Th	0	REPEAT	*** WARNING >100 Genome Hits ***	22	1	0	0	0.00981802	0.173524
GATCATTCAAGGCTACT	s	Th	0	REPEAT	*** WARNING >100 Genome Hits ***	22	5	18	0	0.849537	0.848186
GATCACTTGAAATCAGG	s	Th	0	REPEAT	*** WARNING >100 Genome Hits ***	23	1	0	0	0.00577204	0.173524
GATCATAGCACACTGCA	s	Th	0	REPEAT	*** WARNING >100 Genome Hits ***	23	13	0	0	0.00577204	0.173524
GATCTGCCTGCCTCGGA	s	Th	0	REPEAT	*** WARNING >100 Genome Hits ***	23	9	0	0	0.00577204	0.173524
GATCGTGCCACCACACT	s	Th	0	REPEAT	*** WARNING >100 Genome Hits ***	0	0	23	21	0.00670973	0.184749
GATCTCTTGAACCCAGG	s	Th	0	REPEAT	*** WARNING >100 Genome Hits ***	0	0	23	5	0.00670973	0.184749
GATCTGCTGACCTCGTG	s	Th	0	REPEAT	*** WARNING >100 Genome Hits ***	0	0	23	2	0.00670973	0.184749
GATCCCAAGGCAGAGGA	s	Th	0	REPEAT	*** WARNING >100 Genome Hits ***	23	6	2	2	0.0237562	0.240932
GATCAGGAGATGGAGAC	s	Th	0	REPEAT	*** WARNING >100 Genome Hits ***	5	5	23	8	0.0818301	0.430391
GATCAGGCTGGTCTTGA	s	Th	0	REPEAT	*** WARNING >100 Genome Hits ***	12	0	23	2	0.324375	0.779919
GATCAGGAGGTCAAGAG	s	Th	0	REPEAT	*** WARNING >100 Genome Hits ***	0	0	25	0	0.00375444	0.169253
GATCACTTGAGACTGGG	s	Th	0	REPEAT	*** WARNING >100 Genome Hits ***	0	0	25	4	0.00375444	0.169253
GATCCACCCGTCTCGGC	s	Th	0	REPEAT	*** WARNING >100 Genome Hits ***	0	0	25	27	0.00375444	0.169253
GATCGCAAGGTCAGGAG	s	Th	0	REPEAT	*** WARNING >100 Genome Hits ***	0	0	25	23	0.00375444	0.169253
GATCACGGCTTACTGCA	s	Th	0	REPEAT	*** WARNING >100 Genome Hits ***	0	0	25	27	0.00375444	0.169253
GATCACTTGAGGCCACG	s	Th	0	REPEAT	*** WARNING >100 Genome Hits ***	0	0	25	27	0.00375444	0.169253
GATCTCACTATGTTGCC	s	Th	0	REPEAT	*** WARNING >100 Genome Hits ***	12	3	25	3	0.21522	0.745141
GATCAAGCCACTGTACT	s	Th	0	REPEAT	*** WARNING >100 Genome Hits ***	27	4	0	0	0.00341255	0.129606
GATCTACCCACCTTGGC	s	Th	0	REPEAT	*** WARNING >100 Genome Hits ***	27	26	0	0	0.00341255	0.129606
GATCAGTCTGGCCAACA	s	Th	0	REPEAT	*** WARNING >100 Genome Hits ***	27	12	0	0	0.00341255	0.129606
GATCACTTGAGACCAGA	s	Th	0	REPEAT	*** WARNING >100 Genome Hits ***	27	28	0	0	0.00341255	0.129606
GATCCTCCCGCCTTGGC	s	Th	0	REPEAT	*** WARNING >100 Genome Hits ***	28	29	0	0	0.00341255	0.129606
GATCTCAGACTTCCAGC	s	Th	0	REPEAT	*** WARNING >100 Genome Hits ***	28	4	0	0	0.00341255	0.129606
GATCTGACAGGAGGTGG	s	Th	0	REPEAT	*** WARNING >100 Genome Hits ***	28	18	0	0	0.00341255	0.129606
GATCACACCTGTGAATA	s	Th	0	REPEAT	*** WARNING >100 Genome Hits ***	28	2	0	0	0.00341255	0.129606
GATCAGCCTGGGCAAAA	s	Th	0	REPEAT	*** WARNING >100 Genome Hits ***	28	5	0	0	0.00341255	0.129606
GATCACGCCTGTAATCC	s	Th	0	REPEAT	*** WARNING >100 Genome Hits ***	28	5	0	0	0.00341255	0.129606
GATCACTTGAGCCCCAG	s	Th	0	REPEAT	*** WARNING >100 Genome Hits ***	28	27	0	0	0.00341255	0.129606
GATCACTTGAACCCAGA	s	Th	0	REPEAT	*** WARNING >100 Genome Hits ***	0	0	28	10	0.00211292	0.156764
GATCTCAAACTCCTGGG	s	Th	0	REPEAT	*** WARNING >100 Genome Hits ***	28	2	7	6	0.042303	0.407162
GATCTGCTCACCTCAGC	s	Th	0	REPEAT	*** WARNING >100 Genome Hits ***	28	27	13	12	0.19379	0.657715
GATCAAGACCACGGTGA	s	Th	0	REPEAT	*** WARNING >100 Genome Hits ***	16	1	28	14	0.245881	0.754884
GATCTCAGCTCACCGCA	s	Th	0	REPEAT	*** WARNING >100 Genome Hits ***	30	3	0	0	0.0020268	0.121827
GATCTCAGCTACTCAGG	s	Th	0	REPEAT	*** WARNING >100 Genome Hits ***	0	0	30	27	0.00211292	0.127163
GATCTCAAACTCCTGAC	s	Th	0	REPEAT	*** WARNING >100 Genome Hits ***	31	14	0	0	0.0020268	0.121827
GATCACTTGAGCCAGGA	s	Th	0	REPEAT	*** WARNING >100 Genome Hits ***	31	30	0	0	0.0020268	0.121827
GATCACCTGAGGCCGGG	s	Th	0	REPEAT	*** WARNING >100 Genome Hits ***	0	0	31	29	0.00119467	0.127163
GATCGCTTGAGTCTGGG	s	Th	0	REPEAT	*** WARNING >100 Genome Hits ***	0	0	31	9	0.00119467	0.127163
GATCTCGAACTCCTGAC	s	Th	0	REPEAT	*** WARNING >100 Genome Hits ***	0	0	31	1	0.00119467	0.127163
GATCAAGCAATCCTCCC	s	Th	0	REPEAT	*** WARNING >100 Genome Hits ***	0	0	31	29	0.00119467	0.127163
GATCTCTCTCTCTCTCT	s	Th	0	REPEAT	*** WARNING >100 Genome Hits ***	17	5	31	4	0.272365	0.773915
GATCACAAGGTCAGGGG	s	Th	0	REPEAT	*** WARNING >100 Genome Hits ***	31	10	18	0	0.366534	0.749599
GATCTCGGCTCACGGCA	s	Th	0	REPEAT	*** WARNING >100 Genome Hits ***	22	13	31	29	0.407585	0.845341
GATCACAAGGTCAGGAA	s	Th	0	REPEAT	*** WARNING >100 Genome Hits ***	33	3	0	0	0.00120832	0.0977861
GATCACACCACTGCATG	s	Th	0	REPEAT	*** WARNING >100 Genome Hits ***	0	0	33	30	0.00119467	0.120621
GATCCTTCTGCCTCAGC	s	Th	0	REPEAT	*** WARNING >100 Genome Hits ***	0	0	33	6	0.00119467	0.120621
GATCTGCCTGACTCGGC	s	Th	0	REPEAT	*** WARNING >100 Genome Hits ***	0	0	33	9	0.00119467	0.120621
GATCAGTCAGCAGCCAT	s	Th	0	REPEAT	*** WARNING >100 Genome Hits ***	3	3	33	30	0.00518808	0.167768
GATCGAGACTCCGTCTC	s	Th	0	REPEAT	*** WARNING >100 Genome Hits ***	33	6	13	14	0.086581	0.599557
GATCTGCCCATCTTGGC	s	Th	0	REPEAT	*** WARNING >100 Genome Hits ***	16	15	33	6	0.165861	0.662738
GATCACAGGTGTGAGCC	s	Th	0	REPEAT	*** WARNING >100 Genome Hits ***	23	10	33	1	0.565441	0.820222
GATCACTGGAGTCCAGG	s	Th	0	REPEAT	*** WARNING >100 Genome Hits ***	34	7	0	0	0.00120832	0.0929818
GATCACTTGAGCTTAGG	s	Th	0	REPEAT	*** WARNING >100 Genome Hits ***	34	8	0	0	0.00120832	0.0929818
GATCACTTGAAGCCAGA	s	Th	0	REPEAT	*** WARNING >100 Genome Hits ***	34	4	0	0	0.00120832	0.0929818
GATCACATGCTTCTGAG	s	Th	0	REPEAT	*** WARNING >100 Genome Hits ***	0	0	34	12	0.000678084	0.096944
GATCGCTTGAGGCTAGG	s	Th	0	REPEAT	*** WARNING >100 Genome Hits ***	0	0	34	32	0.000678084	0.096944
GATCTTGAACTCCTGAC	s	Th	0	REPEAT	*** WARNING >100 Genome Hits ***	34	1	3	4	0.00505762	0.127278
GATCGTTTGAGCCCAGG	s	Th	0	REPEAT	*** WARNING >100 Genome Hits ***	34	5	20	18	0.265823	0.692189
GATCCGCCCTCCTCAGC	s	Th	0	REPEAT	*** WARNING >100 Genome Hits ***	36	15	0	0	0.000722659	0.0929818
GATCACCTGAGTCTGGG	s	Th	0	REPEAT	*** WARNING >100 Genome Hits ***	36	3	0	0	0.000722659	0.0929818
GATCCGTCCACCTCGGC	s	Th	0	REPEAT	*** WARNING >100 Genome Hits ***	36	3	0	0	0.000722659	0.0929818
GATCGAGAACATCCTGG	s	Th	0	REPEAT	*** WARNING >100 Genome Hits ***	0	0	36	10	0.000678084	0.096944
GATCACTTGAGCGCAGG	s	Th	0	REPEAT	*** WARNING >100 Genome Hits ***	0	0	36	34	0.000678084	0.096944
GATCAGCTGAGGTCAGG	s	Th	0	REPEAT	*** WARNING >100 Genome Hits ***	37	39	0	0	0.000722659	0.073078
GATCCTCCTACCTCAGC	s	Th	0	REPEAT	*** WARNING >100 Genome Hits ***	37	36	0	0	0.000722659	0.073078
GATCAAGTAGGCTTCAT	s	Th	0	REPEAT	*** WARNING >100 Genome Hits ***	37	2	0	0	0.000722659	0.073078
GATCAGGACCATCCTGG	s	Th	0	REPEAT	*** WARNING >100 Genome Hits ***	37	11	0	0	0.000722659	0.073078
GATCCCAACACTTTGGG	s	Th	0	REPEAT	*** WARNING >100 Genome Hits ***	37	5	0	0	0.000722659	0.073078
GATCCCAGCATTTTGGG	s	Th	0	REPEAT	*** WARNING >100 Genome Hits ***	37	1	0	0	0.000722659	0.073078
GATCTCGAACTCCTGGG	s	Th	0	REPEAT	*** WARNING >100 Genome Hits ***	37	4	0	0	0.000722659	0.073078
GATCAAGACCATACTGG	s	Th	0	REPEAT	*** WARNING >100 Genome Hits ***	0	0	38	2	0.000386126	0.0922803
GATCACGAGGTCAGGTG	s	Th	0	REPEAT	*** WARNING >100 Genome Hits ***	6	6	38	2	0.00570163	0.170148
GATCAAGGTGTCAGCAG	s	Th	0	REPEAT	*** WARNING >100 Genome Hits ***	6	6	38	12	0.00570163	0.170148
GATCCCTTGAACCCAGG	s	Th	0	REPEAT	*** WARNING >100 Genome Hits ***	8	2	38	5	0.0155744	0.22717
GATCTCTTAAGCCCAGG	s	Th	0	REPEAT	*** WARNING >100 Genome Hits ***	39	12	0	0	0.000433378	0.0699457
GATCTTGCTCACTGCAA	s	Th	0	REPEAT	*** WARNING >100 Genome Hits ***	39	3	0	0	0.000433378	0.0699457
GATCTCGGCTCACTGGA	s	Th	0	REPEAT	*** WARNING >100 Genome Hits ***	39	40	0	0	0.000433378	0.0699457
GATCGAGACCAGCCTGA	s	Th	0	REPEAT	*** WARNING >100 Genome Hits ***	0	0	39	43	0.000386126	0.0725022
GATCACTTGAGCTCAGA	s	Th	0	REPEAT	*** WARNING >100 Genome Hits ***	0	0	39	4	0.000386126	0.0725022
GATCAGTCTGGGCAACA	s	Th	0	REPEAT	*** WARNING >100 Genome Hits ***	5	5	39	4	0.00570163	0.159286
GATCACTTGAGCCTTGG	s	Th	0	REPEAT	*** WARNING >100 Genome Hits ***	39	3	11	11	0.037235	0.228133
GATCAGCCTGGACAACA	s	Th	0	REPEAT	*** WARNING >100 Genome Hits ***	39	3	26	12	0.32712	0.744627
GATCGCTTGAGCTTGGG	s	Th	0	REPEAT	*** WARNING >100 Genome Hits ***	39	3	38	1	0.937504	0.860676
GATCACTGGAGCTCAGG	s	Th	0	REPEAT	*** WARNING >100 Genome Hits ***	41	1	0	0	0.000433378	0.0699457
GATCACTTAAGCCCAAG	s	Th	0	REPEAT	*** WARNING >100 Genome Hits ***	41	5	0	0	0.000433378	0.0699457
GATCGAGACCATGCTGG	s	Th	0	REPEAT	*** WARNING >100 Genome Hits ***	0	0	41	38	0.000220483	0.0725022
GATCACGAGGTGAGGAG	s	Th	0	REPEAT	*** WARNING >100 Genome Hits ***	42	13	0	0	0.000260508	0.0620318
GATCTCAAACTCCGTGC	s	Th	0	REPEAT	*** WARNING >100 Genome Hits ***	0	0	43	7	0.000220483	0.0696973
GATCTGCCTACCTCGGC	s	Th	0	REPEAT	*** WARNING >100 Genome Hits ***	0	0	43	3	0.000220483	0.0696973
GATCGCCTGAGCTCAGG	s	Th	0	REPEAT	*** WARNING >100 Genome Hits ***	0	0	43	16	0.000220483	0.0696973
GATCGAGACCGTCCTGG	s	Th	0	REPEAT	*** WARNING >100 Genome Hits ***	0	0	43	46	0.000220483	0.0696973
GATCAGGAGATTGAGAC	s	Th	0	REPEAT	*** WARNING >100 Genome Hits ***	39	6	43	46	0.901264	0.861705
GATCAAACTACTCCGAG	s	Th	0	REPEAT	*** WARNING >100 Genome Hits ***	44	2	0	0	0.000260508	0.0602665
GATCACTTGAGCCCGGG	s	Th	0	REPEAT	*** WARNING >100 Genome Hits ***	0	0	44	2	0.000126201	0.0620318
GATCACACCACTACACT	s	Th	0	REPEAT	*** WARNING >100 Genome Hits ***	0	0	44	41	0.000126201	0.0620318
GATCTCAGACTGCTGTG	s	Th	0	REPEAT	*** WARNING >100 Genome Hits ***	45	9	0	0	0.000156916	0.0602665
GATCTCACTCTGTTGCC	s	Th	0	REPEAT	*** WARNING >100 Genome Hits ***	45	3	0	0	0.000156916	0.0602665
GATCACTTGAGGTCACG	s	Th	0	REPEAT	*** WARNING >100 Genome Hits ***	45	3	0	0	0.000156916	0.0602665
GATCGAGACCATGGTGA	s	Th	0	REPEAT	*** WARNING >100 Genome Hits ***	45	13	0	0	0.000156916	0.0602665
GATCCATCTGCCTCGGC	s	Th	0	REPEAT	*** WARNING >100 Genome Hits ***	45	9	28	26	0.268756	0.68865
GATCAGGAGTTCAAAAC	s	Th	0	REPEAT	*** WARNING >100 Genome Hits ***	0	0	46	3	0.000126201	0.0620318
GATCTGTCTGCCTCAGC	s	Th	0	REPEAT	*** WARNING >100 Genome Hits ***	14	15	46	13	0.0298978	0.388069
GATCAAGACCACCCTGG	s	Th	0	REPEAT	*** WARNING >100 Genome Hits ***	47	45	0	0	0.000156916	0.0512997
GATCTCGCTCTGTTGCC	s	Th	0	REPEAT	*** WARNING >100 Genome Hits ***	47	20	0	0	0.000156916	0.0512997
GATCAAGAGTTTGAGAC	s	Th	0	REPEAT	*** WARNING >100 Genome Hits ***	0	0	48	2	7.2386e-05	0.0602665
GATCATAAGGTCAGGAG	s	Th	0	REPEAT	*** WARNING >100 Genome Hits ***	11	11	48	2	0.00852815	0.171639
GATCATTTGAGCCTAGG	s	Th	0	REPEAT	*** WARNING >100 Genome Hits ***	0	0	49	6	7.2386e-05	0.0512997
GATCATTTGAGCCTGGG	s	Th	0	REPEAT	*** WARNING >100 Genome Hits ***	16	6	49	46	0.0189976	0.23334
GATCTGCTTGCCTTGGC	s	Th	0	REPEAT	*** WARNING >100 Genome Hits ***	23	6	49	7	0.114854	0.597548
GATCACGAGGTTAGGAG	s	Th	0	REPEAT	*** WARNING >100 Genome Hits ***	50	11	0	0	9.46885e-05	0.0503822
GATCCTGGCCAACATGG	s	Th	0	REPEAT	*** WARNING >100 Genome Hits ***	50	5	0	0	9.46885e-05	0.0503822
GATCACTTGAAGTCAGG	s	Th	0	REPEAT	*** WARNING >100 Genome Hits ***	50	17	0	0	9.46885e-05	0.0503822
GATCGTGCCACTGAACT	s	Th	0	REPEAT	*** WARNING >100 Genome Hits ***	0	0	51	55	4.15955e-05	0.0512997
GATCACGCCACGGCACT	s	Th	0	REPEAT	*** WARNING >100 Genome Hits ***	0	0	51	47	4.15955e-05	0.0512997
GATCACTTGAGCCGAGG	s	Th	0	REPEAT	*** WARNING >100 Genome Hits ***	0	0	52	12	4.15955e-05	0.0503822
GATCACACCACCACACT	s	Th	0	REPEAT	*** WARNING >100 Genome Hits ***	0	0	52	24	4.15955e-05	0.0503822
GATCTGACAGGAGGCAG	s	Th	0	REPEAT	*** WARNING >100 Genome Hits ***	5	5	52	4	0.000663967	0.0741054
GATCAGGAGTTCCAGAC	s	Th	0	REPEAT	*** WARNING >100 Genome Hits ***	27	10	52	6	0.127985	0.640524
GATCACTCCAGCCTGGG	s	Th	0	REPEAT	*** WARNING >100 Genome Hits ***	52	0	30	8	0.148357	0.646502
GATCACGCCATCGCACT	s	Th	0	REPEAT	*** WARNING >100 Genome Hits ***	53	11	0	0	5.72305e-05	0.0435195
GATCACTGGAGGTCAGG	s	Th	0	REPEAT	*** WARNING >100 Genome Hits ***	53	5	0	0	5.72305e-05	0.0435195
GATCACTTGAGGTCAAG	s	Th	0	REPEAT	*** WARNING >100 Genome Hits ***	53	33	30	27	0.148357	0.646502
GATCTCAAACTCCTGGC	s	Th	0	REPEAT	*** WARNING >100 Genome Hits ***	39	6	54	3	0.387699	0.804026
GATCGCTTGAGCCCATG	s	Th	0	REPEAT	*** WARNING >100 Genome Hits ***	55	0	0	0	3.46402e-05	0.0406889
GATCGCACCATTGCACC	s	Th	0	REPEAT	*** WARNING >100 Genome Hits ***	55	57	0	0	3.46402e-05	0.0406889
GATCAGCCTGGCTAACA	s	Th	0	REPEAT	*** WARNING >100 Genome Hits ***	56	7	0	0	3.46402e-05	0.0406889
GATCTCGAACTCCCGAC	s	Th	0	REPEAT	*** WARNING >100 Genome Hits ***	56	11	0	0	3.46402e-05	0.0406889
GATCACGAGGTCACGAG	s	Th	0	REPEAT	*** WARNING >100 Genome Hits ***	56	4	0	0	3.46402e-05	0.0406889
GATCCACCTGCCTGGGC	s	Th	0	REPEAT	*** WARNING >100 Genome Hits ***	56	7	0	0	3.46402e-05	0.0406889
GATCTGTGGAAGTTTGA	s	Th	0	REPEAT	*** WARNING >100 Genome Hits ***	0	0	56	14	2.39413e-05	0.043986
GATCCCTTGAGCCTAGG	s	Th	0	REPEAT	*** WARNING >100 Genome Hits ***	0	0	56	32	2.39413e-05	0.043986
GATCACAAGGTGAGGAG	s	Th	0	REPEAT	*** WARNING >100 Genome Hits ***	16	1	57	6	0.00468077	0.170427
GATCAACATGGTGAAAC	s	Th	0	REPEAT	*** WARNING >100 Genome Hits ***	58	12	0	0	2.0994e-05	0.0388462
GATCTCCTGACCTCGTG	s	Th	0	REPEAT	*** WARNING >100 Genome Hits ***	58	13	0	0	2.0994e-05	0.0388462
GATCACACCATGGCACT	s	Th	0	REPEAT	*** WARNING >100 Genome Hits ***	59	8	0	0	2.0994e-05	0.0388462
GATCGAGGCCATCCTGG	s	Th	0	REPEAT	*** WARNING >100 Genome Hits ***	0	0	59	1	1.38001e-05	0.0406889
GATCAAGTTGGCTTCAT	s	Th	0	REPEAT	*** WARNING >100 Genome Hits ***	0	0	61	0	7.965e-06	0.0388462
GATCATTTGAACCCAGG	s	Th	0	REPEAT	*** WARNING >100 Genome Hits ***	0	0	61	17	7.965e-06	0.0388462
GATCCACCTACCTTGGC	s	Th	0	REPEAT	*** WARNING >100 Genome Hits ***	61	9	0	0	1.27385e-05	0.0388462
GATCACTTGAACCCTGG	s	Th	0	REPEAT	*** WARNING >100 Genome Hits ***	16	3	61	13	0.00290305	0.16073
GATCGAGACCACAGTGA	s	Th	0	REPEAT	*** WARNING >100 Genome Hits ***	22	1	61	17	0.0132046	0.369005
GATCACACCACTGCGCT	s	Th	0	REPEAT	*** WARNING >100 Genome Hits ***	61	1	44	41	0.374837	0.779958
GATCCACCCTCCTTGGC	s	Th	0	REPEAT	*** WARNING >100 Genome Hits ***	62	4	11	11	0.00164508	0.0713382
GATCCTCCTGTCTCAGC	s	Th	0	REPEAT	*** WARNING >100 Genome Hits ***	11	11	62	2	0.00117303	0.0921634
GATCCTTTCCCTCCTCC	s	Th	0	REPEAT	*** WARNING >100 Genome Hits ***	62	18	51	18	0.60244	0.811426
GATCACGAGGCCAGGAG	s	Th	0	REPEAT	*** WARNING >100 Genome Hits ***	0	0	64	20	4.60262e-06	0.0388462
GATCGCTGGAGCCCAGG	s	Th	0	REPEAT	*** WARNING >100 Genome Hits ***	6	6	64	13	7.72305e-05	0.0521146
GATCTGCCCTCCTCAGC	s	Th	0	REPEAT	*** WARNING >100 Genome Hits ***	66	20	0	0	7.73758e-06	0.0343782
GATCACGCCACTGTGCT	s	Th	0	REPEAT	*** WARNING >100 Genome Hits ***	66	1	7	6	0.000119943	0.0545859
GATCACAGCTCACCGCA	s	Th	0	REPEAT	*** WARNING >100 Genome Hits ***	17	1	66	5	0.00409757	0.160276
GATCACGAGGGCAGGAG	s	Th	0	REPEAT	*** WARNING >100 Genome Hits ***	0	0	67	6	2.66252e-06	0.0343782
GATCGTGCTATTGCACT	s	Th	0	REPEAT	*** WARNING >100 Genome Hits ***	0	0	67	62	2.66252e-06	0.0343782
GATCCTCCTGCCTCGGC	s	Th	0	REPEAT	*** WARNING >100 Genome Hits ***	41	26	67	13	0.129948	0.653352
GATCACTTGAGGTCAGC	s	Th	0	REPEAT	*** WARNING >100 Genome Hits ***	50	1	67	10	0.331915	0.794733
GATCACGCCATGGCACT	s	Th	0	REPEAT	*** WARNING >100 Genome Hits ***	67	34	56	52	0.516369	0.817226
GATCCAGCAATCCCACC	s	Th	0	REPEAT	*** WARNING >100 Genome Hits ***	0	0	69	1	2.66252e-06	0.0343782
GATCTGTCCGCCTTGGC	s	Th	0	REPEAT	*** WARNING >100 Genome Hits ***	69	1	0	0	4.70449e-06	0.0343782
GATCACAGGCATGAGCC	s	Th	0	REPEAT	*** WARNING >100 Genome Hits ***	69	18	44	2	0.234921	0.678065
GATCACGCCACTACACT	s	Th	0	REPEAT	*** WARNING >100 Genome Hits ***	70	68	0	0	2.8629e-06	0.0343782
GATCAGCCTGGTCAACA	s	Th	0	REPEAT	*** WARNING >100 Genome Hits ***	72	23	0	0	2.8629e-06	0.0343782
GATCACAAGGTCCCACA	s	Th	0	REPEAT	*** WARNING >100 Genome Hits ***	9	3	72	1	8.75414e-05	0.0606306
GATCACTTGAGTCTGGG	s	Th	0	REPEAT	*** WARNING >100 Genome Hits ***	64	9	72	2	0.754963	0.855385
GATCTCGTGAGACTTAT	s	Th	0	REPEAT	*** WARNING >100 Genome Hits ***	73	14	0	0	1.74364e-06	0.0343782
GATCACTTGAGCCAGGG	s	Th	0	REPEAT	*** WARNING >100 Genome Hits ***	75	78	0	0	1.74364e-06	0.0343782
GATCACTGCACTCCAGC	s	Th	0	REPEAT	*** WARNING >100 Genome Hits ***	72	26	77	6	0.754491	0.861078
GATCGCTTGAGGCCAAG	s	Th	0	REPEAT	*** WARNING >100 Genome Hits ***	78	15	0	0	1.06276e-06	0.0343782
GATCAGTGGTTGCCAGG	s	Th	0	REPEAT	*** WARNING >100 Genome Hits ***	78	7	51	14	0.211216	0.64705
GATCTCGGCTCGCTGCA	s	Th	0	REPEAT	*** WARNING >100 Genome Hits ***	0	0	79	24	5.183e-07	0.0343782
GATCACTTGAGGCCTGG	s	Th	0	REPEAT	*** WARNING >100 Genome Hits ***	0	0	79	24	5.183e-07	0.0343782
GATCAGGAGTTGGAGAC	s	Th	0	REPEAT	*** WARNING >100 Genome Hits ***	80	2	0	0	6.48211e-07	0.0343782
GATCACGGCTCACTGCA	s	Th	0	REPEAT	*** WARNING >100 Genome Hits ***	0	0	80	28	3.00871e-07	0.0343782
GATCACTTGAGTCCGGG	s	Th	0	REPEAT	*** WARNING >100 Genome Hits ***	5	5	80	24	5.26404e-06	0.0343782
GATCCCACAGAAATACA	s	Th	0	REPEAT	*** WARNING >100 Genome Hits ***	37	8	80	9	0.0222609	0.387897
GATCACTTGAGGCCGGG	s	Th	0	REPEAT	*** WARNING >100 Genome Hits ***	83	11	0	0	3.95623e-07	0.0343782
GATCTGCCTGCCTCTGC	s	Th	0	REPEAT	*** WARNING >100 Genome Hits ***	83	5	25	23	0.0021502	0.107095
GATCCAGACCATCCTGG	s	Th	0	REPEAT	*** WARNING >100 Genome Hits ***	83	14	34	2	0.0144291	0.21628
GATCACGTGAGGTCAGG	s	Th	0	REPEAT	*** WARNING >100 Genome Hits ***	0	0	84	2	1.74778e-07	0.0343782
GATCACGAGGTCAGAAG	s	Th	0	REPEAT	*** WARNING >100 Genome Hits ***	87	3	0	0	2.41607e-07	0.0343782
GATCAAGACCAGCCTGG	s	Th	0	REPEAT	*** WARNING >100 Genome Hits ***	84	16	87	5	0.858094	0.861188
GATCTGCCCATCTCAGC	s	Th	0	REPEAT	*** WARNING >100 Genome Hits ***	89	2	0	0	1.47633e-07	0.0343782
GATCTTGCTCTGTCACC	s	Th	0	REPEAT	*** WARNING >100 Genome Hits ***	22	1	90	15	0.00022017	0.0729352
GATCACTTGAGGTTAGG	s	Th	0	REPEAT	*** WARNING >100 Genome Hits ***	92	17	0	0	9.02585e-08	0.0343782
GATCGTTTGAGCTCAGG	s	Th	0	REPEAT	*** WARNING >100 Genome Hits ***	0	0	92	24	5.90933e-08	0.0343782
GATCTGTGCAGCAAACC	s	Th	0	REPEAT	*** WARNING >100 Genome Hits ***	31	2	92	4	0.00213408	0.123459
GATCCCAGCTACTGGGG	s	Th	0	REPEAT	*** WARNING >100 Genome Hits ***	42	6	93	8	0.0143737	0.237668
GATCGGGAGTTCGAGAC	s	Th	0	REPEAT	*** WARNING >100 Genome Hits ***	22	23	95	49	0.000136868	0.0629759
GATCAAGTGGAAGAAAG	s	Th	0	REPEAT	*** WARNING >100 Genome Hits ***	0	0	97	16	2.00256e-08	0.0343782
GATCCTCCTTCCTTGGC	s	Th	0	REPEAT	*** WARNING >100 Genome Hits ***	0	0	98	6	2.00256e-08	0.0343782
GATCACAACTCCTTGCC	s	Th	0	REPEAT	*** WARNING >100 Genome Hits ***	98	8	25	7	0.0002705	0.0609844
GATCACTTGGGCCTGGG	s	Th	0	REPEAT	*** WARNING >100 Genome Hits ***	67	2	98	19	0.198711	0.688974
GATCAGCCTGGCCAAGA	s	Th	0	REPEAT	*** WARNING >100 Genome Hits ***	98	2	69	9	0.182093	0.652402
GATCACTTGAGTCCAGG	s	Th	0	REPEAT	*** WARNING >100 Genome Hits ***	100	18	67	62	0.182093	0.639118
GATCGCACCATTGCGCT	s	Th	0	REPEAT	*** WARNING >100 Genome Hits ***	100	40	93	2	0.846015	0.854255
GATCGCTTGAACTCAGG	s	Th	0	REPEAT	*** WARNING >100 Genome Hits ***	0	0	102	12	1.16666e-08	0.0343782
GATCGAGGCTGCAGTGA	s	Th	0	REPEAT	*** WARNING >100 Genome Hits ***	50	11	102	28	0.0184971	0.240856
GATCTGTGACCTTACCC	s	Th	0	REPEAT	*** WARNING >100 Genome Hits ***	102	17	79	73	0.313078	0.735251
GATCTTGGACTTCCAGC	s	Th	0	REPEAT	*** WARNING >100 Genome Hits ***	103	13	85	10	0.468612	0.794633
GATCGCACCATGGCACT	s	Th	0	REPEAT	*** WARNING >100 Genome Hits ***	0	0	107	13	3.96513e-09	0.0343782
GATCCCAGCTACTCTGG	s	Th	0	REPEAT	*** WARNING >100 Genome Hits ***	108	10	28	1	0.000170274	0.0508427
GATCGCACCACTGTGCT	s	Th	0	REPEAT	*** WARNING >100 Genome Hits ***	108	8	39	37	0.00142678	0.0990332
GATCAAGTGGGCTTCAT	s	Th	0	REPEAT	*** WARNING >100 Genome Hits ***	58	0	108	2	0.0342118	0.391765
GATCACAGGCGTGAGCC	s	Th	0	REPEAT	*** WARNING >100 Genome Hits ***	109	19	56	8	0.0202579	0.229598
GATCACGCCATTGCGCT	s	Th	0	REPEAT	*** WARNING >100 Genome Hits ***	109	10	102	25	0.768098	0.859519
GATCAGCCTGGCCAATA	s	Th	0	REPEAT	*** WARNING >100 Genome Hits ***	89	36	112	75	0.410344	0.789247
GATCGAGACCATCCTGA	s	Th	0	REPEAT	*** WARNING >100 Genome Hits ***	0	0	113	60	1.3499e-09	0.0343782
GATCACTTGAGACCAGG	s	Th	0	REPEAT	*** WARNING >100 Genome Hits ***	20	21	113	9	7.48489e-06	0.0388462
GATCACTTGAGCTTGGG	s	Th	0	REPEAT	*** WARNING >100 Genome Hits ***	36	3	115	19	0.000427061	0.0704762
GATCACCTGAGTCCAGG	s	Th	0	REPEAT	*** WARNING >100 Genome Hits ***	117	1	36	34	0.000225985	0.059695
GATCCTCCTGTCTTGGC	s	Th	0	REPEAT	*** WARNING >100 Genome Hits ***	117	6	102	9	0.521601	0.824219
GATCGAGACCACGGTGA	s	Th	0	REPEAT	*** WARNING >100 Genome Hits ***	75	7	120	22	0.0635831	0.601747
GATCACTTGGGCCCAGG	s	Th	0	REPEAT	*** WARNING >100 Genome Hits ***	116	23	121	29	0.834204	0.86313
GATCGTGCCACAGCACT	s	Th	0	REPEAT	*** WARNING >100 Genome Hits ***	122	27	0	0	1.09793e-09	0.0343782
GATCACACCTGTAATCC	s	Th	0	REPEAT	*** WARNING >100 Genome Hits ***	0	0	123	21	2.68881e-10	0.0343782
GATCTGCCCTCCTCGGC	s	Th	0	REPEAT	*** WARNING >100 Genome Hits ***	123	25	0	0	6.7385e-10	0.0343782
GATCATAGCTCACTGCA	s	Th	0	REPEAT	*** WARNING >100 Genome Hits ***	123	18	74	14	0.0512462	0.387805
GATCGAGACCATCCTGC	s	Th	0	REPEAT	*** WARNING >100 Genome Hits ***	0	0	128	26	1.57133e-10	0.0343782
GATCTGGAACTCCTGAC	s	Th	0	REPEAT	*** WARNING >100 Genome Hits ***	23	6	128	0	2.73342e-06	0.0343782
GATCGAAACCATCCTGG	s	Th	0	REPEAT	*** WARNING >100 Genome Hits ***	131	64	30	27	8.64595e-06	0.0343782
GATCACGAGGTCAGGAA	s	Th	0	REPEAT	*** WARNING >100 Genome Hits ***	87	9	131	43	0.0976468	0.640455
GATCACCTGAGCCTGAG	s	Th	0	REPEAT	*** WARNING >100 Genome Hits ***	133	9	0	0	1.56045e-10	0.0343782
GATCAGTTGAGGCCAGG	s	Th	0	REPEAT	*** WARNING >100 Genome Hits ***	130	28	134	14	0.910923	0.86912
GATCGTGCCATTACACT	s	Th	0	REPEAT	*** WARNING >100 Genome Hits ***	136	3	0	0	9.5874e-11	0.0343782
GATCGCTTCAGCCCAGG	s	Th	0	REPEAT	*** WARNING >100 Genome Hits ***	0	0	136	60	3.14158e-11	0.0343782
GATCAGCCTGGCCAACG	s	Th	0	REPEAT	*** WARNING >100 Genome Hits ***	81	16	136	17	0.0322246	0.402441
GATCTAGACCATCCTGG	s	Th	0	REPEAT	*** WARNING >100 Genome Hits ***	0	0	138	52	3.14158e-11	0.0343782
GATCACTTGAGGCCAGA	s	Th	0	REPEAT	*** WARNING >100 Genome Hits ***	0	0	138	73	3.14158e-11	0.0343782
GATCTACCCACCTCGGC	s	Th	0	REPEAT	*** WARNING >100 Genome Hits ***	139	22	0	0	5.89191e-11	0.0343782
GATCTGTCCGCCTCGGC	s	Th	0	REPEAT	*** WARNING >100 Genome Hits ***	0	0	139	7	1.838e-11	0.0343782
GATCAACTGGAAGAAAG	s	Th	0	REPEAT	*** WARNING >100 Genome Hits ***	141	1	107	3	0.25249	0.675462
GATCGCACCATTGTACT	s	Th	0	REPEAT	*** WARNING >100 Genome Hits ***	142	7	89	20	0.0437292	0.392985
GATCGCACCACTGCGCT	s	Th	0	REPEAT	*** WARNING >100 Genome Hits ***	0	0	143	29	1.07561e-11	0.0343782
GATCACGCCATTGTACT	s	Th	0	REPEAT	*** WARNING >100 Genome Hits ***	123	7	143	14	0.509508	0.841734
GATCCTCCCATCTCAGC	s	Th	0	REPEAT	*** WARNING >100 Genome Hits ***	145	3	74	19	0.00767648	0.159444
GATCAGTTGAGGTCAGG	s	Th	0	REPEAT	*** WARNING >100 Genome Hits ***	147	23	54	50	0.0003757	0.0627382
GATCTTGCTATGTTGCC	s	Th	0	REPEAT	*** WARNING >100 Genome Hits ***	148	6	57	7	0.000471744	0.0692208
GATCACTTGAGCACAGG	s	Th	0	REPEAT	*** WARNING >100 Genome Hits ***	97	9	148	78	0.0689714	0.604911
GATCACTTGAGGTTGGG	s	Th	0	REPEAT	*** WARNING >100 Genome Hits ***	52	9	149	3	0.000119105	0.0631075
GATCATTTGAGGTCAGG	s	Th	0	REPEAT	*** WARNING >100 Genome Hits ***	152	1	149	46	0.943602	0.860726
GATCCATCTGCCTCAGC	s	Th	0	REPEAT	*** WARNING >100 Genome Hits ***	0	0	153	20	2.1585e-12	0.0343782
GATCGCCTGAGGTCGGG	s	Th	0	REPEAT	*** WARNING >100 Genome Hits ***	155	38	0	0	5.18119e-12	0.0343782
GATCACTTGGGGTCAGG	s	Th	0	REPEAT	*** WARNING >100 Genome Hits ***	91	3	157	1	0.0173343	0.37247
GATCACTTGAAGCCAGG	s	Th	0	REPEAT	*** WARNING >100 Genome Hits ***	75	37	161	72	0.00171891	0.129022
GATCACTTGGACACAGG	s	Th	0	REPEAT	*** WARNING >100 Genome Hits ***	109	6	161	19	0.0799304	0.604499
GATCAGCCTGGGCAACG	s	Th	0	REPEAT	*** WARNING >100 Genome Hits ***	52	3	164	7	2.31602e-05	0.043986
GATCACTTGAACCCGGG	s	Th	0	REPEAT	*** WARNING >100 Genome Hits ***	66	4	164	19	0.000264453	0.0719919
GATCGTGCCATTGTACT	s	Th	0	REPEAT	*** WARNING >100 Genome Hits ***	105	18	164	20	0.0489086	0.428689
GATCAGAGCAGAACTGA	s	Th	0	REPEAT	*** WARNING >100 Genome Hits ***	167	2	116	59	0.0954693	0.432345
GATCCGCCCACCTTGGC	s	Th	0	REPEAT	*** WARNING >100 Genome Hits ***	169	32	16	15	5.86905e-10	0.0343782
GATCACTTGAGACCAGC	s	Th	0	REPEAT	*** WARNING >100 Genome Hits ***	0	0	177	17	5.12923e-14	0.0343782
GATCACTTGAGCCCAGA	s	Th	0	REPEAT	*** WARNING >100 Genome Hits ***	0	0	180	54	2.9976e-14	0.0343782
GATCACAGGGTCAGGAG	s	Th	0	REPEAT	*** WARNING >100 Genome Hits ***	180	8	31	7	1.89001e-08	0.0343782
GATCACTTGAGCCCAAG	s	Th	0	REPEAT	*** WARNING >100 Genome Hits ***	180	61	154	14	0.40962	0.763
GATCAAGACCAGCCTGA	s	Th	0	REPEAT	*** WARNING >100 Genome Hits ***	183	8	162	27	0.542967	0.794514
GATCATTTGAGCCCAGG	s	Th	0	REPEAT	*** WARNING >100 Genome Hits ***	0	0	187	41	1.04361e-14	0.0343782
GATCGCACCATTACACT	s	Th	0	REPEAT	*** WARNING >100 Genome Hits ***	191	0	0	0	2.5091e-14	0.0343782
GATCCCTTGAGCCCAGG	s	Th	0	REPEAT	*** WARNING >100 Genome Hits ***	192	11	177	69	0.630519	0.837259
GATCAGGAGGTCAGGAG	s	Th	0	REPEAT	*** WARNING >100 Genome Hits ***	195	45	62	68	3.48103e-06	0.0343782
GATCACAAGGTCGGGAG	s	Th	0	REPEAT	*** WARNING >100 Genome Hits ***	0	0	202	1	6.66134e-16	0.0343782
GATCAGCCTGGCCAATG	s	Th	0	REPEAT	*** WARNING >100 Genome Hits ***	36	10	215	8	2.44053e-10	0.0343782
GATCACGCCACTGTACT	s	Th	0	REPEAT	*** WARNING >100 Genome Hits ***	220	81	66	61	3.12456e-07	0.0343782
GATCACGCCACTGCGCT	s	Th	0	REPEAT	*** WARNING >100 Genome Hits ***	0	0	228	63	0	0.0343782
GATCACTTGAGGCTGGG	s	Th	0	REPEAT	*** WARNING >100 Genome Hits ***	80	2	228	24	2.23888e-06	0.0343782
GATCACACCACTGTACT	s	Th	0	REPEAT	*** WARNING >100 Genome Hits ***	237	48	87	81	4.58839e-06	0.0343782
GATCGCCTGAGCCCAGG	s	Th	0	REPEAT	*** WARNING >100 Genome Hits ***	158	1	238	59	0.0246143	0.38904
GATCGCACCACTGTACT	s	Th	0	REPEAT	*** WARNING >100 Genome Hits ***	117	7	241	135	0.000251783	0.0729352
GATCACACCATTACACT	s	Th	0	REPEAT	*** WARNING >100 Genome Hits ***	242	69	26	9	2.4003e-13	0.0343782
GATCTGTCACTGTCTCC	s	Th	0	REPEAT	*** WARNING >100 Genome Hits ***	183	5	244	7	0.0960274	0.643132
GATCACTGGAGCCCAGG	s	Th	0	REPEAT	*** WARNING >100 Genome Hits ***	245	16	153	29	0.00991507	0.173791
GATCTCAGCTCACTGCA	s	Th	0	REPEAT	*** WARNING >100 Genome Hits ***	255	17	239	44	0.674304	0.842384
GATCCTCCTGCCTTGGC	s	Th	0	REPEAT	*** WARNING >100 Genome Hits ***	258	36	185	3	0.0560841	0.389409
GATCACGAGGTCAGGCG	s	Th	0	REPEAT	*** WARNING >100 Genome Hits ***	228	8	271	4	0.269201	0.780471
GATCACTTGAGCCTAGG	s	Th	0	REPEAT	*** WARNING >100 Genome Hits ***	183	8	274	43	0.0171979	0.372779
GATCCGCCCACCTCGGC	s	Th	0	REPEAT	*** WARNING >100 Genome Hits ***	280	4	233	18	0.234328	0.673762
GATCAAGGCTGCAGTGA	s	Th	0	REPEAT	*** WARNING >100 Genome Hits ***	155	18	289	17	0.000428483	0.0928092
GATCACGAGGTCGGGAG	s	Th	0	REPEAT	*** WARNING >100 Genome Hits ***	228	24	300	18	0.0730758	0.622696
GATCCACCTGCCTCGCC	s	Th	0	REPEAT	*** WARNING >100 Genome Hits ***	0	0	305	146	0	0.0343782
GATCCGCCTGCCTCAGC	s	Th	0	REPEAT	*** WARNING >100 Genome Hits ***	316	48	266	11	0.248145	0.66618
GATCGCTTGAGCCCGGG	s	Th	0	REPEAT	*** WARNING >100 Genome Hits ***	0	0	325	41	0	0.0343782
GATCCGCCCACCTCAGC	s	Th	0	REPEAT	*** WARNING >100 Genome Hits ***	330	56	171	17	6.55616e-05	0.0435195
GATCACTTGAGGGCAGG	s	Th	0	REPEAT	*** WARNING >100 Genome Hits ***	0	0	336	1	0	0.0343782
GATCGCTTGAGCCTAGG	s	Th	0	REPEAT	*** WARNING >100 Genome Hits ***	91	19	343	64	7.4436e-12	0.0343782
GATCACAGCTCACTGCA	s	Th	0	REPEAT	*** WARNING >100 Genome Hits ***	105	18	346	68	1.83188e-10	0.0343782
GATCGCTTGAACCTGGG	s	Th	0	REPEAT	*** WARNING >100 Genome Hits ***	184	6	349	54	5.33319e-05	0.059695
GATCACACCACCGCACT	s	Th	0	REPEAT	*** WARNING >100 Genome Hits ***	355	5	0	0	0	0.0343782
GATCACTTGAACCCAGG	s	Th	0	REPEAT	*** WARNING >100 Genome Hits ***	233	3	366	83	0.00236843	0.167727
GATCACAAGGTCAAGAG	s	Th	0	REPEAT	*** WARNING >100 Genome Hits ***	366	35	244	7	0.0070334	0.150933
GATCTCGGCTCACCGCA	s	Th	0	REPEAT	*** WARNING >100 Genome Hits ***	378	2	361	35	0.723165	0.838868
GATCTGCCCACCTTGGC	s	Th	0	REPEAT	*** WARNING >100 Genome Hits ***	381	62	382	2	0.958023	0.860981
GATCGCACCACTGCACC	s	Th	0	REPEAT	*** WARNING >100 Genome Hits ***	0	0	413	126	0	0.0343782
GATCATTTGAGGCCAGG	s	Th	0	REPEAT	*** WARNING >100 Genome Hits ***	72	74	413	41	0	0.0343782
GATCACTTGAGGTCGGG	s	Th	0	REPEAT	*** WARNING >100 Genome Hits ***	330	72	453	21	0.0151101	0.368427
GATCACTTGAACCTGGG	s	Th	0	REPEAT	*** WARNING >100 Genome Hits ***	173	8	458	4	2.25756e-10	0.0343782
GATCCGCCCGCCTCAGC	s	Th	0	REPEAT	*** WARNING >100 Genome Hits ***	481	15	292	83	0.00014922	0.0503822
GATCGAGACCAGCCTGG	s	Th	0	REPEAT	*** WARNING >100 Genome Hits ***	464	17	484	96	0.717838	0.861151
GATCAGTTGAGCCCAGG	s	Th	0	REPEAT	*** WARNING >100 Genome Hits ***	139	3	502	4	1.11022e-15	0.0343782
GATCGAGACCACCCTGG	s	Th	0	REPEAT	*** WARNING >100 Genome Hits ***	512	32	0	0	0	0.0343782
GATCCACCCACCTCACC	s	Th	0	REPEAT	*** WARNING >100 Genome Hits ***	48	47	522	77	0	0.0343782
GATCACGAGGTCAGGGG	s	Th	0	REPEAT	*** WARNING >100 Genome Hits ***	127	3	559	34	0	0.0343782
GATCCACCCGCCTCGCC	s	Th	0	REPEAT	*** WARNING >100 Genome Hits ***	0	0	572	234	0	0.0343782
GATCGTGCCATTGCGCT	s	Th	0	REPEAT	*** WARNING >100 Genome Hits ***	587	64	354	57	2.30045e-05	0.0343782
GATCGCTTGAACCCGGG	s	Th	0	REPEAT	*** WARNING >100 Genome Hits ***	184	35	602	41	0	0.0343782
GATCAGGAGTTCAAGAC	s	Th	0	REPEAT	*** WARNING >100 Genome Hits ***	395	28	602	9	0.000249229	0.091975
GATCCGCCTGCCTCGGC	s	Th	0	REPEAT	*** WARNING >100 Genome Hits ***	541	31	605	164	0.273482	0.804873
GATCCCAGCTACTCAGG	s	Th	0	REPEAT	*** WARNING >100 Genome Hits ***	347	12	610	48	1.81124e-06	0.0343782
GATCACCTGAGGACAGG	s	Th	0	REPEAT	*** WARNING >100 Genome Hits ***	0	0	628	14	0	0.0343782
GATCCCAGCTACTTGGG	s	Th	0	REPEAT	*** WARNING >100 Genome Hits ***	644	101	600	109	0.49219	0.76283
GATCACCTGAGGTTGGG	s	Th	0	REPEAT	*** WARNING >100 Genome Hits ***	581	130	651	232	0.254082	0.793081
GATCAGGAGTTTGAGAC	s	Th	0	REPEAT	*** WARNING >100 Genome Hits ***	542	30	695	42	0.0158006	0.381322
GATCCTCCCACCTCACC	s	Th	0	REPEAT	*** WARNING >100 Genome Hits ***	270	36	741	265	2.22045e-16	0.0343782
GATCGCACCACCGCACT	s	Th	0	REPEAT	*** WARNING >100 Genome Hits ***	748	75	0	0	0	0.0343782
GATCCTCCCACCTCAGC	s	Th	0	REPEAT	*** WARNING >100 Genome Hits ***	778	17	627	354	0.0240525	0.216142
GATCCACCCGCCTCAGC	s	Th	0	REPEAT	*** WARNING >100 Genome Hits ***	562	84	795	174	0.000362984	0.0970549
GATCTGCCCACCTCAGC	s	Th	0	REPEAT	*** WARNING >100 Genome Hits ***	797	65	828	109	0.645652	0.861215
GATCTGCCCGCCTCAGC	s	Th	0	REPEAT	*** WARNING >100 Genome Hits ***	655	1	830	289	0.0116213	0.298755
GATCACATGGACACAGG	s	Th	0	REPEAT	*** WARNING >100 Genome Hits ***	447	16	835	49	1.0446e-09	0.0343782
GATCGCCTGAGGTCAGG	s	Th	0	REPEAT	*** WARNING >100 Genome Hits ***	302	131	836	199	0	0.0343782
GATCACCTGAGGCCAGG	s	Th	0	REPEAT	*** WARNING >100 Genome Hits ***	464	8	855	117	1.67062e-09	0.0343782
GATCCACCCACCTCAGC	s	Th	0	REPEAT	*** WARNING >100 Genome Hits ***	884	116	882	341	0.980514	0.857301
GATCTGCCTGCCTTGGC	s	Th	0	REPEAT	*** WARNING >100 Genome Hits ***	708	61	907	34	0.00551725	0.22715
GATCACTTGAGCTCAGG	s	Th	0	REPEAT	*** WARNING >100 Genome Hits ***	545	61	932	169	1.99939e-08	0.0343782
GATCACACCATTGCACT	s	Th	0	REPEAT	*** WARNING >100 Genome Hits ***	173	168	937	91	0	0.0343782
GATCACGAGGTCAAGAG	s	Th	0	REPEAT	*** WARNING >100 Genome Hits ***	942	41	920	39	0.777448	0.836606
GATCCACCTGCCTCAGC	s	Th	0	REPEAT	*** WARNING >100 Genome Hits ***	919	140	1009	39	0.242686	0.796023
GATCTGCCTGCCTCAGC	s	Th	0	REPEAT	*** WARNING >100 Genome Hits ***	648	85	1030	29	2.00821e-07	0.0343782
GATCACGCCACTGCACC	s	Th	0	REPEAT	*** WARNING >100 Genome Hits ***	0	0	1035	766	0	0.0343782
GATCACACCACTGCACC	s	Th	0	REPEAT	*** WARNING >100 Genome Hits ***	1036	269	0	0	0	0.0343782
GATCGCTTGAGCTCAGG	s	Th	0	REPEAT	*** WARNING >100 Genome Hits ***	356	19	1053	21	0	0.0343782
GATCAGGAGTTCGAGAC	s	Th	0	REPEAT	*** WARNING >100 Genome Hits ***	650	35	1073	209	1.12272e-08	0.0343782
GATCTGCCTGCCTCGGC	s	Th	0	REPEAT	*** WARNING >100 Genome Hits ***	553	6	1094	159	6.41709e-14	0.0343782
GATCGCTTGAGGTCAGG	s	Th	0	REPEAT	*** WARNING >100 Genome Hits ***	437	62	1163	228	0	0.0343782
GATCACGCCACCGCACT	s	Th	0	REPEAT	*** WARNING >100 Genome Hits ***	851	328	1255	393	8.58759e-07	0.0343782
GATCGCTTGAGCCTGGG	s	Th	0	REPEAT	*** WARNING >100 Genome Hits ***	851	34	1284	32	1.55569e-07	0.0343782
GATCAAGACCATCCTGG	s	Th	0	REPEAT	*** WARNING >100 Genome Hits ***	1284	246	1019	170	0.00213555	0.0741109
GATCCCAGCTACTCGGG	s	Th	0	REPEAT	*** WARNING >100 Genome Hits ***	673	66	1287	110	7.32747e-15	0.0343782
GATCGCTTGAGGCCAGG	s	Th	0	REPEAT	*** WARNING >100 Genome Hits ***	1023	137	1363	196	9.89849e-05	0.0719919
GATCCACCCACCTCGGC	s	Th	0	REPEAT	*** WARNING >100 Genome Hits ***	1061	331	1461	278	7.9412e-06	0.0444611
GATCTGCCCACCTCGGC	s	Th	0	REPEAT	*** WARNING >100 Genome Hits ***	742	182	1473	117	0	0.0343782
GATCACCTGAGCCCAGG	s	Th	0	REPEAT	*** WARNING >100 Genome Hits ***	856	33	1571	37	4.44089e-16	0.0343782
GATCGCTTGAACCCAGG	s	Th	0	REPEAT	*** WARNING >100 Genome Hits ***	692	51	1638	20	0	0.0343782
GATCACAAGGTCAGGAG	s	Th	0	REPEAT	*** WARNING >100 Genome Hits ***	1681	149	1660	16	0.837814	0.830869
GATCCGCCCGCCTCGGC	s	Th	0	REPEAT	*** WARNING >100 Genome Hits ***	1733	265	1196	88	3.173e-08	0.0343782
GATCCACCTGCCTCGGC	s	Th	0	REPEAT	*** WARNING >100 Genome Hits ***	956	133	1761	384	0	0.0343782
GATCACTTGAGCCTGGG	s	Th	0	REPEAT	*** WARNING >100 Genome Hits ***	987	63	1778	141	0	0.0343782
GATCGCACCATTGCACT	s	Th	0	REPEAT	*** WARNING >100 Genome Hits ***	978	197	2047	85	0	0.0343782
GATCTGCCCGCCTCGGC	s	Th	0	REPEAT	*** WARNING >100 Genome Hits ***	1478	198	2091	365	8.05447e-09	0.0343782
GATCCACCCGCCTCGGC	s	Th	0	REPEAT	*** WARNING >100 Genome Hits ***	2115	1	1988	281	0.265959	0.615365
GATCAGCCTGGGCAACA	s	Th	0	REPEAT	*** WARNING >100 Genome Hits ***	1326	49	2637	129	0	0.0343782
GATCGCGCCACTGCACG	s	Th	0	REPEAT	*** WARNING >100 Genome Hits ***	0	0	3243	394	0	0.0343782
GATCACGCCATTGCACT	s	Th	0	REPEAT	*** WARNING >100 Genome Hits ***	2092	103	3351	225	0	0.0343782
GATCGTGCCACTGCACG	s	Th	0	REPEAT	*** WARNING >100 Genome Hits ***	0	0	3536	518	0	0.0343782
GATCAGCCTGGCCAACA	s	Th	0	REPEAT	*** WARNING >100 Genome Hits ***	2132	135	3976	180	0	0.0343782
GATCGCACCACTGCACT	s	Th	0	REPEAT	*** WARNING >100 Genome Hits ***	3404	95	6026	2285	0	0.0343782
GATCGCTTGAGCCCAGG	s	Th	0	REPEAT	*** WARNING >100 Genome Hits ***	4896	311	6372	375	5.77316e-15	0.0343782
GATCTCGGCTCACTGCA	s	Th	0	REPEAT	*** WARNING >100 Genome Hits ***	5368	15	6565	152	7.30004e-10	0.0343782
GATCACTTGAGGCCAGG	s	Th	0	REPEAT	*** WARNING >100 Genome Hits ***	4365	205	7878	1658	0	0.0343782
GATCACTTGAGGTCAGG	s	Th	0	REPEAT	*** WARNING >100 Genome Hits ***	10394	457	10046	995	0.172057	0.225868
GATCACTTGAGCCCAGG	s	Th	0	REPEAT	*** WARNING >100 Genome Hits ***	7991	99	11391	479	0	0.0343782
GATCACGAGGTCAGGAG	s	Th	0	REPEAT	*** WARNING >100 Genome Hits ***	8870	209	12196	391	0	0.0343782
GATCGAGACCATCCTGG	s	Th	0	REPEAT	*** WARNING >100 Genome Hits ***	12788	376	22670	324	0	0.0343782
GATCACCTGAGGTCAGG	s	Th	0	REPEAT	*** WARNING >100 Genome Hits ***	18572	1825	24768	186	0	0.0343782
GATCAGGGAAAATACAA	s	T	1	Hs.494321	BC060815:Hs.494321:Hs184: ATP/GTP binding protein 1	0	0	4	4	0.290216	0.686951
GATCCCCAGACAGAGTC	s	T	1	Hs.241558	AW134587:Hs.241558:Hs184: Ariadne homolog 2 (Drosophila)	0	0	4	4	0.290216	0.686951
GATCCTCAGTCTCACTA	s	T	1	Hs.534375	NM_003782:Hs.534375:Hs184: UDP-Gal:betaGlcNAc beta 1,3-galactosyltransferase, polypeptide 4	0	0	4	4	0.290216	0.686951
GATCTGAGGATTTCCCA	s	T	1	Hs.502759	BI913170:Hs.502759:Hs184: Beta-1,3-glucuronyltransferase 3 (glucuronosyltransferase I)	0	0	4	4	0.290216	0.686951
GATCAATTCAAAGTTAC	s	T	1	Hs.330663	AA831264:Hs.330663:Hs184: Hypothetical protein FLJ20641	0	0	4	0	0.290216	0.686951
GATCCAGTCTCAAGCCT	s	T	1	Hs.517331	BX094326:Hs.517331:Hs184: Chromosome 21 open reading frame 2	0	0	4	4	0.290216	0.686951
GATCCAGAGCAAGTTCC	s	T	1	Hs.373952	AI206863:Hs.373952:Hs184: Calmodulin binding transcription activator 2	0	0	4	0	0.290216	0.686951
GATCCTGGTGCTATGGT	s	T	1	Hs.334911	BM985430:Hs.334911:Hs184: PKD2 interactor, golgi and endoplasmic reticulum associated 1	0	0	4	4	0.290216	0.686951
GATCTGTAGTGTCATGG	s	T	1	Hs.34045	NM_017955:Hs.34045:Hs184: Cell division cycle associated 4	0	0	4	4	0.290216	0.686951
GATCCAACACAAGCAGT	s	T	1	Hs.119882	AK172791:Hs.119882:Hs184: Cyclin-dependent kinase 6	0	0	4	4	0.290216	0.686951
GATCCCTGGACAATTAT	s	T	1	Hs.515490	NM_145056:Hs.515490:Hs184: Thymus expressed gene 3-like	0	0	4	4	0.290216	0.686951
GATCCTGGGACACTCTG	s	T	1	Hs.407015	CA423738:Hs.407015:Hs184: Distal-less homeo box 1	0	0	4	4	0.290216	0.686951
GATCAGTTTGTGTGTGG	s	T	1	Hs.388087	BX115852:Hs.388087:Hs184: Zinc finger, CSL domain containing 2	0	0	4	4	0.290216	0.686951
GATCCTCTATTTTGTGA	s	T	1	Hs.326035	BC041701:Hs.326035:Hs184: Early growth response 1	0	0	4	4	0.290216	0.686951
GATCCAGTTGTCCTGTC	s	T	1	Hs.25597	CA308147:Hs.25597:Hs184: Elongation of very long chain fatty acids (FEN1/Elo2, SUR4/Elo3, yeast)-like 1	0	0	4	0	0.290216	0.686951
GATCCTCCCAAAACGCT	s	T	1	Hs.99480	AF306679:Hs.99480:Hs184: Establishment of cohesion 1 homolog 2 (S. cerevisiae)	0	0	4	4	0.290216	0.686951
GATCCAGAGCAACACAG	s	T	1	Hs.120094	BC047016:Hs.120094:Hs184: FCH and double SH3 domains 1	0	0	4	0	0.290216	0.686951
GATCCGCTCTCGGCGAC	s	T	1	Hs.511316	BM681401:Hs.511316:Hs184: Hypothetical protein FLJ10038	0	0	4	4	0.290216	0.686951
GATCTGGAAACTATTTG	s	T	1	Hs.20573	BC010607:Hs.20573:Hs184: Insulin-like growth factor 1 receptor	0	0	4	4	0.290216	0.686951
GATCGTAAGTCCCAGGT	s	T	1	Hs.521693	AW137648:Hs.521693:Hs184: Hypothetical protein FLJ20530	0	0	4	0	0.290216	0.686951
GATCGGACACAAATTGA	s	T	1	Hs.232532	NM_014749:Hs.232532:Hs184: KIAA0586	0	0	4	4	0.290216	0.686951
GATCCACTCATCAGTTT	s	T	1	Hs.380475	AL110229:Hs.380475:Hs184: KIAA1530 protein	0	0	4	0	0.290216	0.686951
GATCTTTGAAGTCTATT	s	T	1	Hs.272251	BC048262:Hs.272251:Hs184: Kelch-like 5 (Drosophila)	0	0	4	4	0.290216	0.686951
GATCTTAGGACGTTTCC	s	T	1	Hs.387787	NM_007360:Hs.387787:Hs184: Killer cell lectin-like receptor subfamily K, member 1	0	0	4	4	0.290216	0.686951
GATCTTCAGTGCTGATA	s	T	1	Hs.64341	AW450035:Hs.64341:Hs184: Homo sapiens, clone IMAGE:5171705, mRNA	0	0	4	0	0.290216	0.686951
GATCAACTGTGCTTATT	s	T	1	Hs.460574	AA827896:Hs.460574:Hs184: Hypothetical protein BC017488	0	0	4	4	0.290216	0.686951
GATCACCCATGAGATGT	s	T	1	Hs.75277	BC069048:Hs.75277:Hs184: Hypothetical protein FLJ13910	0	0	4	4	0.290216	0.686951
GATCCTTCCTCTGGGGG	s	T	1	Hs.536063	CD367005:Hs.536063:Hs184: DnaJ (Hsp40) homolog, subfamily C, member 6	0	0	4	0	0.290216	0.686951
GATCCACCAGGCATAGG	s	T	1	Hs.161338	BF511077:Hs.161338:Hs184: Hypothetical LOC285711	0	0	4	0	0.290216	0.686951
GATCCGGTATAAGGTTT	s	T	1	Hs.136893	NM_152447:Hs.136893:Hs184: Leucine rich repeat and fibronectin type III domain containing 5	0	0	4	0	0.290216	0.686951
GATCCACACCAGTCACC	s	T	1	Hs.194694	AF100318:Hs.194694:Hs184: Mitogen-activated protein kinase kinase kinase 6	0	0	4	4	0.290216	0.686951
GATCCCGGTGTGCCCAG	s	T	1	Hs.65377	AI452933:Hs.65377:Hs184: Membrane-associated ring finger (C3HC4) 9	0	0	4	4	0.290216	0.686951
GATCATTGTTGCCAGAT	s	T	1	Hs.171265	BC010622:Hs.171265:Hs184: Mdm4, transformed 3T3 cell double minute 1, p53 binding protein (mouse)	0	0	4	4	0.290216	0.686951
GATCATGTAGCAGAAAC	s	T	1	Hs.270492	AW873132:Hs.270492:Hs184: B melanoma antigen family, member 4	0	0	4	4	0.290216	0.686951
GATCCTGTGGATTAGAA	s	T	1	Hs.414300	NM_080741:Hs.414300:Hs184: Sialidase 4	0	0	4	4	0.290216	0.686951
GATCAGCCCTCATTTTG	s	T	1	Hs.81328	AL047588:Hs.81328:Hs184: Nuclear factor of kappa light polypeptide gene enhancer in B-cells inhibitor, alpha	0	0	4	0	0.290216	0.686951
GATCTTCAGCCTTCGTT	s	T	1	Hs.209113	AA133620:Hs.209113:Hs184: NODAL modulator 3	0	0	4	4	0.290216	0.686951
GATCTTTAGCAACTTTT	s	T	1	Hs.9333	NM_002605:Hs.9333:Hs184: Phosphodiesterase 8A	0	0	4	0	0.290216	0.686951
GATCCAGGGATGGAGAT	s	T	1	Hs.268177	CX760354:Hs.268177:Hs184: Phospholipase C, gamma 1	0	0	4	4	0.290216	0.686951
GATCCTCCTTTTGTTAG	s	T	1	Hs.483259	NM_130809:Hs.483259:Hs184: Hypothetical protein MGC12103	0	0	4	4	0.290216	0.686951
GATCATCTAATTTCCTG	s	T	1	Hs.506652	BC001652:Hs.506652:Hs184: Nuclear phosphoprotein similar to S. cerevisiae PWP1	0	0	4	4	0.290216	0.686951
GATCTTTAATGCTTCAG	s	T	1	Hs.310645	AU309595:Hs.310645:Hs184: RAB1A, member RAS oncogene family	0	0	4	4	0.290216	0.686951
GATCTGGGAAAACACCA	s	T	1	Hs.19012	BC065725:Hs.19012:Hs184: Rab9 effector p40	0	0	4	4	0.290216	0.686951
GATCCATTTCCGCACGC	s	T	1	Hs.283694	BC004919:Hs.283694:Hs184: Hypothetical protein FLJ10324	0	0	4	4	0.290216	0.686951
GATCCTAGGAGCCCACG	s	T	1	Hs.533720	BM145443:Hs.533720:Hs184: Tumor necrosis factor receptor superfamily, member 19-like	0	0	4	4	0.290216	0.686951
GATCCAAGAGCTGAAGA	s	T	1	Hs.232021	AW449591:Hs.232021:Hs184: REV3-like, catalytic subunit of DNA polymerase zeta (yeast)	0	0	4	4	0.290216	0.686951
GATCCAGCCCATTCTCT	s	T	1	Hs.369373	BC001151:Hs.369373:Hs184: Sec23 homolog B (S. cerevisiae)	0	0	4	4	0.290216	0.686951
GATCACCTCGGTGAAGC	s	T	1	Hs.481022	BF435547:Hs.481022:Hs184: Secreted frizzled-related protein 2	0	0	4	4	0.290216	0.686951
GATCTGCTTATCTGGCT	s	T	1	Hs.436194	NM_022911:Hs.436194:Hs184: Solute carrier family 26, member 6	0	0	4	4	0.290216	0.686951
GATCCCCTTCATTTCTT	s	T	1	Hs.448342	BC064916:Hs.448342:Hs184: Chromosome 17 open reading frame 31	0	0	4	4	0.290216	0.686951
GATCCAGTGTATTCCTA	s	T	1	Hs.43627	NM_006943:Hs.43627:Hs184: SRY (sex determining region Y)-box 12	0	0	4	4	0.290216	0.686951
GATCACAATGGCATGCT	s	T	1	Hs.433343	BC028054:Hs.433343:Hs184: Serine/arginine repetitive matrix 2	0	0	4	4	0.290216	0.686951
GATCTGCAAGTGCTGAG	s	T	1	Hs.95600	AW663048:Hs.95600:Hs184: Hypothetical protein LOC221711	0	0	4	0	0.290216	0.686951
GATCTTTGGGCTCCTGG	s	T	1	Hs.369819	BC062601:Hs.369819:Hs184: TBC1 domain family, member 16	0	0	4	4	0.290216	0.686951
GATCGTGCCAGCACCGC	s	T	1	Hs.513305	BC010576:Hs.513305:Hs184: Transcription factor AP-4 (activating enhancer binding protein 4)	0	0	4	4	0.290216	0.686951
GATCATAACTCATTGCA	s	T	1	Hs.276876	CA307180:Hs.276876:Hs184: Beta-amyloid binding protein precursor	0	0	4	4	0.290216	0.686951
GATCAGGGATGTGAGGC	s	T	1	Hs.279929	AI573066:Hs.279929:Hs184: Transmembrane emp24 protein transport domain containing 9	0	0	4	4	0.290216	0.686951
GATCGCGGCGCAGCGTG	s	T	1	Hs.288761	NM_025124:Hs.288761:Hs184: Hypothetical protein FLJ21749	0	0	4	4	0.290216	0.686951
GATCTTCTCTTCCCAAC	s	T	1	Hs.524399	BC032583:Hs.524399:Hs184: Trophinin associated protein (tastin)	0	0	4	4	0.290216	0.686951
GATCAACTGAGAGCGCT	s	T	1	Hs.533655	BE890037:Hs.533655:Hs184: Trypsin domain containing 1	0	0	4	4	0.290216	0.686951
GATCTAGAGTATAAGCT	s	T	1	Hs.109520	BC037279:Hs.109520:Hs184: Chromosome 13 open reading frame 9	0	0	4	4	0.290216	0.686951
GATCTGTTCAAGTTCTA	s	T	1	Hs.512715	NM_000553:Hs.512715:Hs184: Werner syndrome	0	0	4	4	0.290216	0.686951
GATCTACTTTGTTTGAG	s	T	1	Hs.530988	AI912659:Hs.530988:Hs184: Zinc finger protein 237	0	0	4	4	0.290216	0.686951
GATCATTTCTGCATTTT	s	T	1	Hs.436973	BM992992:Hs.436973:Hs184: Zinc finger protein 516	0	0	4	4	0.290216	0.686951
GATCACACATGCCCCCT	s	T	1	Hs.301431	BM673945:Hs.301431:Hs184: Zinc finger protein 71 (Cos26)	0	0	4	0	0.290216	0.686951
GATCCGTGCTACTTTCC	s	T	1	Hs.277624	BC047285:Hs.277624:Hs184: Zinc finger, ZZ type with EF hand domain 1	0	0	4	4	0.290216	0.686951
GATCCCCACAGTTTGCT	s	T	1	Hs.538094	AA825273:Hs.538094:Hs184: Transcribed locus	0	0	4	4	0.290216	0.686951
GATCTGAGATGTTCCTT	s	T	1	Hs.500775	AA836251:Hs.500775:Hs184: Zinc finger protein 207	0	0	4	4	0.290216	0.686951
GATCCCTGATGCTACAC	s	T	1	Hs.518718	AA947824:Hs.518718:Hs184: Transcribed locus	0	0	4	4	0.290216	0.686951
GATCCCCCAACTCTGGA	s	T	1	Hs.283416	AA969131:Hs.283416:Hs184: Paired related homeobox 1	0	0	4	4	0.290216	0.686951
GATCTGGTTGGTCAGGA	s	T	1	Hs.370359	AI675944:Hs.370359:Hs184: Nuclear factor I/B	0	0	4	4	0.290216	0.686951
GATCCTCCGCCTCCCAG	s	T	1	Hs.191842	AI695803:Hs.191842:Hs184: Cadherin 3, type 1, P-cadherin (placental)	0	0	4	4	0.290216	0.686951
GATCCGTGTGGTTTGCT	s	T	1	Hs.523080	BC029259:Hs.523080:Hs184: Chromosome 10 open reading frame 56	0	0	4	4	0.290216	0.686951
GATCTGCTGATTTGTGC	s	T	1	Hs.126890	BI715235:Hs.126890:Hs184: Transcribed locus, weakly similar to XP_209041.2 PREDICTED: similar to KIAA1503 protein [Homo sapiens]	0	0	4	4	0.290216	0.686951
GATCTGCAGCCAGGTTC	s	T	1	Hs.74137	BQ016714:Hs.74137:Hs184: Transmembrane trafficking protein	0	0	4	4	0.290216	0.686951
GATCCGCCATGTTGTCC	s	T	1	Hs.548022	BQ028752:Hs.548022:Hs184: Transcribed locus, moderately similar to NP_055301.1 neuronal thread protein AD7c-NTP [Homo sapiens]	0	0	4	0	0.290216	0.686951
GATCCGAATGCTTGCCT	s	T	1	Hs.298069	CA431579:Hs.298069:Hs184: Nuclear respiratory factor 1	0	0	4	4	0.290216	0.686951
GATCTGGTGAGCACCTT	s	T	1	Hs.15929	BC011348:Hs.15929:Hs184: Chromosome 6 open reading frame 211	2	2	4	4	0.93679	0.848303
GATCCGCAGTGGTGGAG	s	T	1	Hs.363572	BC049196:Hs.363572:Hs184: Choline/ethanolamine phosphotransferase 1	2	2	4	0	0.93679	0.848303
GATCTGCCATATTTGTG	s	T	1	Hs.76224	AA704122:Hs.76224:Hs184: EGF-containing fibulin-like extracellular matrix protein 1	2	2	4	4	0.93679	0.848303
GATCCAGCAATTCCTCT	s	T	1	Hs.467793	AA768016:Hs.467793:Hs184: Hypothetical protein FLJ40869	2	2	4	4	0.93679	0.848303
GATCCGGGATGGGAGAC	s	T	1	Hs.520459	BM968943:Hs.520459:Hs184: General transcription factor II, i	2	2	4	4	0.93679	0.848303
GATCCTGACAAGAAGAA	s	T	1	Hs.445977	AA243477:Hs.445977:Hs184: General transcription factor IIIA	2	2	4	4	0.93679	0.848303
GATCCCCCTCTTTGCAC	s	T	1	Hs.529571	AI669550:Hs.529571:Hs184: Retinol binding protein 1, cellular	2	2	4	0	0.93679	0.848303
GATCTGCCTCCTCTGCT	s	T	1	Hs.202082	BX113945:Hs.202082:Hs184: Transcribed locus	2	2	4	4	0.93679	0.848303
GATCTGGTTGTTGTCCC	s	T	1	Hs.382168	CN480118:Hs.382168:Hs184: Nuclear receptor coactivator 3	2	2	4	0	0.93679	0.848303
GATCAGCAAACAGGAAT	s	T	1	Hs.500483	BC017554:Hs.500483:Hs184: Actin, alpha 2, smooth muscle, aorta	3	3	4	4	0.93679	0.848303
GATCCCCTTGGAAAGGA	s	T	1	Hs.904	BE466121:Hs.904:Hs184: Amylo-1, 6-glucosidase, 4-alpha-glucanotransferase (glycogen debranching enzyme, glycogen storage disease type III)	3	3	4	4	0.93679	0.848303
GATCCACCAATGGAATT	s	T	1	Hs.334534	NM_002076:Hs.334534:Hs184: Glucosamine (N-acetyl)-6-sulfatase (Sanfilippo disease IIID)	3	0	4	4	0.93679	0.848303
GATCATGTTTTGCTACA	s	T	1	Hs.443507	AA992595:Hs.443507:Hs184: HIV-1 Rev binding protein	3	0	4	0	0.93679	0.848303
GATCTTTTGCCGTGGTT	s	T	1	Hs.330073	NM_014686:Hs.330073:Hs184: KIAA0355	3	3	4	0	0.93679	0.848303
GATCCTCAAGCATCTCT	s	T	1	Hs.288274	BC060844:Hs.288274:Hs184: KIAA1609 protein	3	0	4	4	0.93679	0.848303
GATCACCATTAACAAGG	s	T	1	Hs.533383	BU077216:Hs.533383:Hs184: Polymerase (RNA) II (DNA directed) polypeptide J, 13.3kDa	3	3	4	4	0.93679	0.848303
GATCCCCCGCCAACCTA	s	T	1	Hs.190341	BC012608:Hs.190341:Hs184: Proline rich Gla (G-carboxyglutamic acid) 1	3	3	4	4	0.93679	0.848303
GATCGCAGGAATCAGGG	s	T	1	Hs.119889	BC051467:Hs.119889:Hs184: RAP2C, member of RAS oncogene family	3	3	4	4	0.93679	0.848303
GATCTGCCTTATCCGAG	s	T	1	Hs.202517	AW583509:Hs.202517:Hs184: Hypothetical protein DKFZp762O076	3	3	4	4	0.93679	0.848303
GATCTGCAAGCATTTGC	s	T	1	Hs.484242	BC015791:Hs.484242:Hs184: Expressed in T-cells and eosinophils in atopic dermatitis	3	3	4	4	0.93679	0.848303
GATCCCCAAACCCTGGT	s	T	1	Hs.196555	AL832168:Hs.196555:Hs184: MRNA; cDNA DKFZp686P24158 (from clone DKFZp686P24158)	3	3	4	4	0.93679	0.848303
GATCAGCAGCAAAAAAA	s	T	1	Hs.529901	BF445989:Hs.529901:Hs184: X (inactive)-specific transcript	3	0	4	4	0.93679	0.848303
GATCCAGCATCTTCCAG	s	T	1	Hs.56607	NM_022040:Hs.56607:Hs184: Linker for activation of T cells family, member 2	3	3	4	0	0.93679	0.848303
GATCCTGCAGGCCAGCG	s	T	1	Hs.234898	BC028417:Hs.234898:Hs184: Acetyl-Coenzyme A carboxylase beta	5	5	0	0	0.181179	0.678357
GATCATTGGTGTGGACA	s	T	1	Hs.78989	BC014665:Hs.78989:Hs184: Alcohol dehydrogenase 5 (class III), chi polypeptide	5	2	0	0	0.181179	0.678357
GATCTAGTCATCTGGTT	s	T	1	Hs.498292	BC019085:Hs.498292:Hs184: V-akt murine thymoma viral oncogene homolog 3 (protein kinase B, gamma)	5	5	0	0	0.181179	0.678357
GATCTTTGCCCCTGGTA	s	T	1	Hs.102	NM_000481:Hs.102:Hs184: Aminomethyltransferase (glycine cleavage system protein T)	5	2	0	0	0.181179	0.678357
GATCAGTTTTTCCTCTT	s	T	1	Hs.279582	BF508637:Hs.279582:Hs184: SAR1a gene homolog 2 (S. cerevisiae)	5	2	0	0	0.181179	0.678357
GATCTATGAACAGCTTG	s	T	1	Hs.433332	BM693450:Hs.433332:Hs184: Mitogen-activated protein kinase kinase 1 interacting protein 1	5	1	0	0	0.181179	0.678357
GATCCAGTCCTTCTAAG	s	T	1	Hs.212172	AF294900:Hs.212172:Hs184: Beta-carotene 15,15'-monooxygenase 1	5	5	0	0	0.181179	0.678357
GATCATTTGGGTTAGTA	s	T	1	Hs.444200	AI651563:Hs.444200:Hs184: Fetal Alzheimer antigen	5	2	0	0	0.181179	0.678357
GATCCATGGTTATTCCT	s	T	1	Hs.447458	AI453334:Hs.447458:Hs184: Hypothetical protein LOC143286	5	1	0	0	0.181179	0.678357
GATCCAGGAGGTAATCC	s	T	1	Hs.514016	BC010612:Hs.514016:Hs184: Hypothetical protein LOC339263	5	5	0	0	0.181179	0.678357
GATCCTCATATACCCCC	s	T	1	Hs.417029	BM665105:Hs.417029:Hs184: S-phase 2 protein	5	1	0	0	0.181179	0.678357
GATCTTTGGACTGACTG	s	T	1	Hs.132340	BC040876:Hs.132340:Hs184: Chromosome 6 open reading frame 85	5	5	0	0	0.181179	0.678357
GATCTGCCTAGTTTTAG	s	T	1	Hs.435500	AK074467:Hs.435500:Hs184: Hypothetical protein MGC40214	5	1	0	0	0.181179	0.678357
GATCTGAAATCTTCAGT	s	T	1	Hs.308074	AK172815:Hs.308074:Hs184: Chromosome 9 open reading frame 5	5	1	0	0	0.181179	0.678357
GATCTTCAGCTTGGTAG	s	T	1	Hs.234355	NM_001002259:Hs.234355:Hs184: C1q domain containing 1	5	5	0	0	0.181179	0.678357
GATCCTCCTCAAGACCC	s	T	1	Hs.112971	BC075861:Hs.112971:Hs184: Chromosome 10 open reading frame 130	5	5	0	0	0.181179	0.678357
GATCACCTTCAAGACAG	s	T	1	Hs.21811	NM_018074:Hs.21811:Hs184: Hypothetical protein FLJ10374	5	5	0	0	0.181179	0.678357
GATCATGACAGTGCTCC	s	T	1	Hs.270437	BM988858:Hs.270437:Hs184: Collagen, type IV, alpha 3 (Goodpasture antigen) binding protein	5	5	0	0	0.181179	0.678357
GATCTGTCCGAATAGAG	s	T	1	Hs.502363	BC092458:Hs.502363:Hs184: FLJ45212 protein	5	5	0	0	0.181179	0.678357
GATCAGATTGCCATGCT	s	T	1	Hs.549122	BC017185:Hs.549122:Hs184: Cleavage stimulation factor, 3' pre-RNA, subunit 2, 64kDa, tau variant	5	5	0	0	0.181179	0.678357
GATCTGTGGAGACAAAA	s	T	1	Hs.483811	NM_001330:Hs.483811:Hs184: Cardiotrophin 1	5	5	0	0	0.181179	0.678357
GATCCTTGTTCTCTGCT	s	T	1	Hs.339735	BC008308:Hs.339735:Hs184: Cullin 4A	5	5	0	0	0.181179	0.678357
GATCCTCCAGGTGCACA	s	T	1	Hs.531668	CA447661:Hs.531668:Hs184: Chemokine (C-X3-C motif) ligand 1	5	1	0	0	0.181179	0.678357
GATCAACTTTAAGAAGA	s	T	1	Hs.510328	NM_020414:Hs.510328:Hs184: DEAD (Asp-Glu-Ala-Asp) box polypeptide 24	5	5	0	0	0.181179	0.678357
GATCCAAATCTGGTTCA	s	T	1	Hs.335551	AA641655:Hs.335551:Hs184: Dihydrolipoamide S-acetyltransferase (E2 component of pyruvate dehydrogenase complex)	5	5	0	0	0.181179	0.678357
GATCTGTATTTTCTAAG	s	T	1	Hs.78582	BC000493:Hs.78582:Hs184: Developmentally regulated GTP binding protein 2	5	5	0	0	0.181179	0.678357
GATCCACCACAAGACAG	s	T	1	Hs.187058	NM_020892:Hs.187058:Hs184: Deltex homolog 2 (Drosophila)	5	5	0	0	0.181179	0.678357
GATCGCCTCGGCCTCCT	s	T	1	Hs.439552	BU628783:Hs.439552:Hs184: Eukaryotic translation elongation factor 1 alpha 1	5	5	0	0	0.181179	0.678357
GATCTTCAGATACTCTC	s	T	1	Hs.135507	BC010992:Hs.135507:Hs184: Egl nine homolog 3 (C. elegans)	5	2	0	0	0.181179	0.678357
GATCTGCTGGAGTACAG	s	T	1	Hs.301613	AF116615:Hs.301613:Hs184: JTV1 gene	5	1	0	0	0.181179	0.678357
GATCGCCGCTTCTTCCC	s	T	1	Hs.283551	AI139781:Hs.283551:Hs184: Eukaryotic translation initiation factor 2B, subunit 5 epsilon, 82kDa	5	1	0	0	0.181179	0.678357
GATCACCGGGGGCTTCT	s	T	1	Hs.289106	BC013830:Hs.289106:Hs184: EMI domain containing 1	5	5	0	0	0.181179	0.678357
GATCAAACAAGTGTCTT	s	T	1	Hs.18442	NM_021204:Hs.18442:Hs184: E-1 enzyme	5	5	0	0	0.181179	0.678357
GATCACCTGCATCACAG	s	T	1	Hs.213394	AA912110:Hs.213394:Hs184: Erythrocyte membrane protein band 4.1-like 3	5	5	0	0	0.181179	0.678357
GATCCAGTGTGAGCAGC	s	T	1	Hs.43697	AI681825:Hs.43697:Hs184: Ets variant gene 5 (ets-related molecule)	5	5	0	0	0.181179	0.678357
GATCTCCTTAGGTGATG	s	T	1	Hs.14415	BC022067:Hs.14415:Hs184: Exosome component 1	5	5	0	0	0.181179	0.678357
GATCTTTGTTACAGCTC	s	T	1	Hs.154652	NM_147189:Hs.154652:Hs184: Hypothetical protein MGC39325	5	5	0	0	0.181179	0.678357
GATCATGTCAAAATGTT	s	T	1	Hs.404706	NM_145284:Hs.404706:Hs184: Similar to hypothetical protein MGC17347	5	2	0	0	0.181179	0.678357
GATCCCCAGGAGCCCAG	s	T	1	Hs.24951	BC031951:Hs.24951:Hs184: Hypothetical protein FLJ37034	5	5	0	0	0.181179	0.678357
GATCCCCGAAAGCGCCA	s	T	1	Hs.196086	NM_018088:Hs.196086:Hs184: Hypothetical protein FLJ10408	5	5	0	0	0.181179	0.678357
GATCCTTAAATCCGCCC	s	T	1	Hs.553721	CR627086:Hs.553721:Hs184: Hypothetical protein FLJ31306	5	5	0	0	0.181179	0.678357
GATCCACTTAGAGCAAT	s	T	1	Hs.524234	BC007548:Hs.524234:Hs184: Fibronectin type III domain containing 5	5	1	0	0	0.181179	0.678357
GATCGTTTTGGCCCTGA	s	T	1	Hs.369448	AK025684:Hs.369448:Hs184: Fraser syndrome 1	5	5	0	0	0.181179	0.678357
GATCCAGCCAGTATAGA	s	T	1	Hs.269099	BC017247:Hs.269099:Hs184: Far upstream element (FUSE) binding protein 1	5	1	0	0	0.181179	0.678357
GATCCTGCTGTGGCCTC	s	T	1	Hs.1270	BC001890:Hs.1270:Hs184: Glucokinase (hexokinase 4, maturity onset diabetes of the young 2)	5	5	0	0	0.181179	0.678357
GATCGCTACTCTTAAGA	s	T	1	Hs.494163	NM_004293:Hs.494163:Hs184: Guanine deaminase	5	5	0	0	0.181179	0.678357
GATCTTCCCAGCTCTGC	s	T	1	Hs.42586	AA749080:Hs.42586:Hs184: Glycerol-3-phosphate acyltransferase, mitochondrial	5	5	0	0	0.181179	0.678357
GATCAAACATTTCAGCA	s	T	1	Hs.24258	BQ575111:Hs.24258:Hs184: Guanylate cyclase 1, soluble, alpha 3	5	2	0	0	0.181179	0.678357
GATCCTGCCCTTCAGAG	s	T	1	Hs.3268	BC004279:Hs.3268:Hs184: Heat shock 70kDa protein 6 (HSP70B')	5	1	0	0	0.181179	0.678357
GATCTGGCTTGGCAGAC	s	T	1	Hs.352612	BC024764:Hs.352612:Hs184: IQ motif and Sec7 domain 3	5	1	0	0	0.181179	0.678357
GATCAACGATATCCACA	s	T	1	Hs.160324	AF064243:Hs.160324:Hs184: Intersectin 1 (SH3 domain protein)	5	5	0	0	0.181179	0.678357
GATCCCATCTCTTAGAA	s	T	1	Hs.534040	CR749688:Hs.534040:Hs184: Kelch repeat and BTB (POZ) domain containing 6	5	1	0	0	0.181179	0.678357
GATCAATGGTTATTGTA	s	T	1	Hs.507922	BM668334:Hs.507922:Hs184: KIAA1704	5	5	0	0	0.181179	0.678357
GATCCAAGATGGGAGGT	s	T	1	Hs.407709	AK026326:Hs.407709:Hs184: DRE1 protein	5	2	0	0	0.181179	0.678357
GATCCCCATCGCTGTGG	s	T	1	Hs.494419	BF315894:Hs.494419:Hs184: Lysosomal-associated membrane protein 1	5	5	0	0	0.181179	0.678357
GATCCAACATAACTCAG	s	T	1	Hs.128188	NM_153234:Hs.128188:Hs184: Lix1 homolog (mouse)	5	5	0	0	0.181179	0.678357
GATCATCTAATGAAAGC	s	T	1	Hs.407755	BC022983:Hs.407755:Hs184: Ligand of numb-protein X	5	5	0	0	0.181179	0.678357
GATCATTGTAGGGTAAC	s	T	1	Hs.374076	BC026923:Hs.374076:Hs184: Hypothetical protein LOC221442	5	2	0	0	0.181179	0.678357
GATCCCAGGTCTGCCTG	s	T	1	Hs.420761	AL390167:Hs.420761:Hs184: MRNA; cDNA DKFZp547B124 (from clone DKFZp547B124)	5	5	0	0	0.181179	0.678357
GATCCGCTCGTCTCGGC	s	T	1	Hs.372494	BC071814:Hs.372494:Hs184: CDNA clone IMAGE:6458111, partial cds	5	5	0	0	0.181179	0.678357
GATCCTCCCAGTGCCGT	s	T	1	Hs.518476	BC028116:Hs.518476:Hs184: Hypothetical gene supported by BC028116	5	1	0	0	0.181179	0.678357
GATCAGCCCAAGTTTAC	s	T	1	Hs.444637	NM_004631:Hs.444637:Hs184: Low density lipoprotein receptor-related protein 8, apolipoprotein e receptor	5	5	0	0	0.181179	0.678357
GATCCGAATGAACTCTA	s	T	1	Hs.135736	NM_020929:Hs.135736:Hs184: Netrin-G1 ligand	5	5	0	0	0.181179	0.678357
GATCCTGCCCCAAAGAA	s	T	1	Hs.258855	AV757412:Hs.258855:Hs184: Myeloid/lymphoid or mixed-lineage leukemia (trithorax homolog, Drosophila)	5	5	0	0	0.181179	0.678357
GATCATGTTAGAATCAA	s	T	1	Hs.514713	BC002877:Hs.514713:Hs184: Metallophosphoesterase 1	5	1	0	0	0.181179	0.678357
GATCTACCTTTCCATCC	s	T	1	Hs.238756	NM_021245:Hs.238756:Hs184: Myozenin 1	5	5	0	0	0.181179	0.678357
GATCATGTTTACAGACC	s	T	1	Hs.21334	BC012194:Hs.21334:Hs184: N-acetylglucosamine-1-phosphodiester alpha-N-acetylglucosaminidase	5	5	0	0	0.181179	0.678357
GATCATCTACGACGAGA	s	T	1	Hs.137510	AA764966:Hs.137510:Hs184: Nuclear receptor co-repressor 2	5	2	0	0	0.181179	0.678357
GATCTACGGGCACTGGA	s	T	1	Hs.534453	AV742968:Hs.534453:Hs184: Cell death-regulatory protein GRIM19	5	2	0	0	0.181179	0.678357
GATCCCATGGCCCTGAA	s	T	1	Hs.46296	BC028729:Hs.46296:Hs184: Nescient helix loop helix 2	5	5	0	0	0.181179	0.678357
GATCTGTCTGCTAATGG	s	T	1	Hs.530275	AI829628:Hs.530275:Hs184: Nipsnap homolog 3A (C. elegans)	5	1	0	0	0.181179	0.678357
GATCCCCTTAACTCACA	s	T	1	Hs.468505	BC046631:Hs.468505:Hs184: Neurexin 1	5	2	0	0	0.181179	0.678357
GATCCCAGAAAGAACCC	s	T	1	Hs.213087	AL080120:Hs.213087:Hs184: Odz, odd Oz/ten-m homolog 4 (Drosophila)	5	1	0	0	0.181179	0.678357
GATCCTGAGTAATCCTT	s	T	1	Hs.9315	NM_020190:Hs.9315:Hs184: Olfactomedin-like 3	5	1	0	0	0.181179	0.678357
GATCAACAGAATCAGAG	s	T	1	Hs.525196	BC032310:Hs.525196:Hs184: O-sialoglycoprotein endopeptidase	5	5	0	0	0.181179	0.678357
GATCCGCAGCAGGGGCC	s	T	1	Hs.91608	NM_004802:Hs.91608:Hs184: Otoferlin	5	1	0	0	0.181179	0.678357
GATCCTTGGAAACCGTG	s	T	1	Hs.435714	AA772008:Hs.435714:Hs184: P21/Cdc42/Rac1-activated kinase 1 (STE20 homolog, yeast)	5	2	0	0	0.181179	0.678357
GATCTTTATGAGCCAAG	s	T	1	Hs.368610	BC050627:Hs.368610:Hs184: 3'-phosphoadenosine 5'-phosphosulfate synthase 1	5	5	0	0	0.181179	0.678357
GATCTATGTGTTTGAGG	s	T	1	Hs.518200	NM_031458:Hs.518200:Hs184: Poly (ADP-ribose) polymerase family, member 9	5	5	0	0	0.181179	0.678357
GATCCGAGTGCTGGGGT	s	T	1	Hs.515100	NM_080662:Hs.515100:Hs184: Peroxisomal biogenesis factor 11 gamma	5	5	0	0	0.181179	0.678357
GATCATAACTGAACCAG	s	T	1	Hs.435933	AA741305:Hs.435933:Hs184: PHD finger protein 10	5	5	0	0	0.181179	0.678357
GATCCACTCCTTCCCAC	s	T	1	Hs.201379	BI090626:Hs.201379:Hs184: Phosphorylase kinase, alpha 1 (muscle)	5	2	0	0	0.181179	0.678357
GATCCACCATCAAGGTT	s	T	1	Hs.409834	AI740906:Hs.409834:Hs184: Phosphohistidine phosphatase 1	5	5	0	0	0.181179	0.678357
GATCTTCAAACAGAATA	s	T	1	Hs.132225	NM_181504:Hs.132225:Hs184: Phosphoinositide-3-kinase, regulatory subunit 1 (p85 alpha)	5	5	0	0	0.181179	0.678357
GATCCAAAGCCATCCCA	s	T	1	Hs.18858	BM987654:Hs.18858:Hs184: Phospholipase A2, group IVC (cytosolic, calcium-independent)	5	5	0	0	0.181179	0.678357
GATCCATCCAGAGGAAG	s	T	1	Hs.434271	BM665437:Hs.434271:Hs184: Hypothetical LOC400621	5	5	0	0	0.181179	0.678357
GATCCAGCTCCATATAT	s	T	1	Hs.440604	NM_002811:Hs.440604:Hs184: Proteasome (prosome, macropain) 26S subunit, non-ATPase, 7 (Mov34 homolog)	5	5	0	0	0.181179	0.678357
GATCCACCTGCGTCAGC	s	T	1	Hs.437966	BM989866:Hs.437966:Hs184: Peroxisomal membrane protein 3, 35kDa (Zellweger syndrome)	5	2	0	0	0.181179	0.678357
GATCTTCTATGTAACAG	s	T	1	Hs.10842	AI458043:Hs.10842:Hs184: RAN, member RAS oncogene family	5	5	0	0	0.181179	0.678357
GATCCACGGCCAAGCCC	s	T	1	Hs.531752	AK222813:Hs.531752:Hs184: RAN binding protein 3	5	2	0	0	0.181179	0.678357
GATCATGGTGAGTTGCT	s	T	1	Hs.533712	BC021120:Hs.533712:Hs184: RNA binding motif protein 4	5	2	0	0	0.181179	0.678357
GATCCCACAAAAAGCAA	s	T	1	Hs.97887	BC010120:Hs.97887:Hs184: Reticulocalbin 1, EF-hand calcium binding domain	5	5	0	0	0.181179	0.678357
GATCTTCCCCCAGCGTC	s	T	1	Hs.462754	BM674460:Hs.462754:Hs184: Protein kinase Njmu-R1	5	5	0	0	0.181179	0.678357
GATCGTGTTCAGTAAGG	s	T	1	Hs.502876	BC066954:Hs.502876:Hs184: Ras homolog gene family, member B	5	5	0	0	0.181179	0.678357
GATCGGCATTCAGCGCT	s	T	1	Hs.225014	BC007632:Hs.225014:Hs184: RIM binding protein 2	5	5	0	0	0.181179	0.678357
GATCCCCAGAAGGACAA	s	T	1	Hs.546269	CD048391:Hs.546269:Hs184: Ribosomal protein L10a	5	1	0	0	0.181179	0.678357
GATCTTAAGTCATACAT	s	T	1	Hs.381219	NM_002948:Hs.381219:Hs184: Ribosomal protein L15	5	1	0	0	0.181179	0.678357
GATCATCAAGACTTTAT	s	T	1	Hs.381061	AI252711:Hs.381061:Hs184: Ribosomal protein L19	5	5	0	0	0.181179	0.678357
GATCAGCAGACCGAGTC	s	T	1	Hs.510465	BC044242:Hs.510465:Hs184: Hypothetical protein LOC285927	5	2	0	0	0.181179	0.678357
GATCCCTGTCAGTGGAA	s	T	1	Hs.524161	NM_012425:Hs.524161:Hs184: Ras suppressor protein 1	5	1	0	0	0.181179	0.678357
GATCAACTGAATGAGCT	s	T	1	Hs.511096	BU743291:Hs.511096:Hs184: KIAA0252	5	5	0	0	0.181179	0.678357
GATCCTCTTGCATTATG	s	T	1	Hs.109655	NM_006746:Hs.109655:Hs184: Sex comb on midleg-like 1 (Drosophila)	5	5	0	0	0.181179	0.678357
GATCCTGCCGGGCAAAA	s	T	1	Hs.536358	AI868057:Hs.536358:Hs184: Transcribed locus	5	5	0	0	0.181179	0.678357
GATCAGCACCTTGGCCG	s	T	1	Hs.494556	NM_007001:Hs.494556:Hs184: Solute carrier family 35, member D2	5	1	0	0	0.181179	0.678357
GATCCGAGTGGCATGGT	s	T	1	Hs.516837	CD743190:Hs.516837:Hs184: Est1p-like protein B	5	2	0	0	0.181179	0.678357
GATCTGCTAACTCAAAC	s	T	1	Hs.12409	R45360:Hs.12409:Hs184: Somatostatin	5	5	0	0	0.181179	0.678357
GATCATTTCAAAACTCA	s	T	1	Hs.470943	AI859348:Hs.470943:Hs184: Signal transducer and activator of transcription 1, 91kDa	5	2	0	0	0.181179	0.678357
GATCAGAGGTCTGACAC	s	T	1	Hs.6232	BQ185237:Hs.6232:Hs184: SPTF-associated factor 65 gamma	5	5	0	0	0.181179	0.678357
GATCCGTGACGACGAAC	s	T	1	Hs.274430	BM988005:Hs.274430:Hs184: Surfeit 6	5	1	0	0	0.181179	0.678357
GATCCATAGTGAAATTG	s	T	1	Hs.402752	NM_003487:Hs.402752:Hs184: TAF15 RNA polymerase II, TATA box binding protein (TBP)-associated factor, 68kDa	5	1	0	0	0.181179	0.678357
GATCCGTCCTCATTTTA	s	T	1	Hs.326	NM_134323:Hs.326:Hs184: TAR (HIV) RNA binding protein 2	5	5	0	0	0.181179	0.678357
GATCAACTGTGAGTGAT	s	T	1	Hs.183671	NM_005651:Hs.183671:Hs184: Tryptophan 2,3-dioxygenase	5	2	0	0	0.181179	0.678357
GATCCATAATCCTTGCC	s	T	1	Hs.508835	BX640983:Hs.508835:Hs184: Telomerase-associated protein 1	5	1	0	0	0.181179	0.678357
GATCATTTCGGTTTCAG	s	T	1	Hs.188591	AA171529:Hs.188591:Hs184: Hypothetical protein FLJ22104	5	1	0	0	0.181179	0.678357
GATCCAGGCAAATTCAT	s	T	1	Hs.331268	BI494823:Hs.331268:Hs184: SMILE protein	5	5	0	0	0.181179	0.678357
GATCCCGAGAAAGGGAA	s	T	1	Hs.520182	BC028121:Hs.520182:Hs184: Translocation associated membrane protein 2	5	5	0	0	0.181179	0.678357
GATCCCAGGGTCATCCC	s	T	1	Hs.344812	BC014153:Hs.344812:Hs184: Three prime repair exonuclease 1	5	2	0	0	0.181179	0.678357
GATCCTGACAGAATCAA	s	T	1	Hs.467751	BC002637:Hs.467751:Hs184: Tribbles homolog 2 (Drosophila)	5	1	0	0	0.181179	0.678357
GATCATTTAGTACTTTT	s	T	1	Hs.284141	NM_021648:Hs.284141:Hs184: TSPY-like 4	5	1	0	0	0.181179	0.678357
GATCTTCAGTTGGGGAG	s	T	1	Hs.412918	AW418870:Hs.412918:Hs184: Testis-specific transcript, Y-linked 14	5	5	0	0	0.181179	0.678357
GATCTTCCCAAGTCCTA	s	T	1	Hs.434367	BQ014595:Hs.434367:Hs184: Thioredoxin reductase 1	5	2	0	0	0.181179	0.678357
GATCCTTTAGCTGGTTG	s	T	1	Hs.514297	BQ108689:Hs.514297:Hs184: Hypothetical protein FLJ13855	5	5	0	0	0.181179	0.678357
GATCATGGTGGTTGGCT	s	T	1	Hs.3459	BF001671:Hs.3459:Hs184: KIAA1970 protein	5	5	0	0	0.181179	0.678357
GATCCCAGTGGTCGTCT	s	T	1	Hs.546347	AA058946:Hs.546347:Hs184: WD repeat domain 47	5	5	0	0	0.181179	0.678357
GATCATCTTAGGCTCAG	s	T	1	Hs.391944	BU608976:Hs.391944:Hs184: Hypothetical LOC55432	5	5	0	0	0.181179	0.678357
GATCTCTTCAGTGTCAT	s	T	1	Hs.31743	NM_001001661:Hs.31743:Hs184: Zinc finger protein 425	5	5	0	0	0.181179	0.678357
GATCGCCCAAGTTTATT	s	T	1	Hs.534574	BC065023:Hs.534574:Hs184: Zinc finger protein 564	5	5	0	0	0.181179	0.678357
GATCGCCCTGACATGGG	s	T	1	Hs.133892	AA046797:Hs.133892:Hs184: Tropomyosin 1 (alpha)	5	5	0	0	0.181179	0.678357
GATCCATCAGCAAGTCC	s	T	1	Hs.445436	AA824565:Hs.445436:Hs184: Transcribed locus	5	2	0	0	0.181179	0.678357
GATCATAAATGAAGTAG	s	T	1	Hs.110376	AI247087:Hs.110376:Hs184: Transcribed locus	5	5	0	0	0.181179	0.678357
GATCGTCTGTGAATAGC	s	T	1	Hs.427107	AL049986:Hs.427107:Hs184: MRNA; cDNA DKFZp564E202 (from clone DKFZp564E202)	5	2	0	0	0.181179	0.678357
GATCGTCTGAGTGGTCA	s	T	1	Hs.159422	BC033906:Hs.159422:Hs184: Intimal thickness-related receptor	5	1	0	0	0.181179	0.678357
GATCTTCGCCTGCTGTA	s	T	1	Hs.7093	BC036491:Hs.7093:Hs184: Homo sapiens, Similar to granule cell antiserum positive 8, clone IMAGE:5262496, mRNA	5	1	0	0	0.181179	0.678357
GATCCAAAAGGAAAACC	s	T	1	Hs.90242	BC037800:Hs.90242:Hs184: Homo sapiens, clone IMAGE:4796172, mRNA	5	5	0	0	0.181179	0.678357
GATCTACACTACGGATT	s	T	1	Hs.448989	BC040195:Hs.448989:Hs184: CDNA clone IMAGE:4816129, partial cds	5	2	0	0	0.181179	0.678357
GATCATTAAACTGTTTT	s	T	1	Hs.510533	BF478135:Hs.510533:Hs184: CDC42 binding protein kinase beta (DMPK-like)	5	5	0	0	0.181179	0.678357
GATCCCACTGACACCAC	s	T	1	Hs.547817	BG199257:Hs.547817:Hs184: Transcribed locus	5	1	0	0	0.181179	0.678357
GATCCCCTTTGCAGGAA	s	T	1	Hs.369488	BM452088:Hs.369488:Hs184: Down syndrome critical region gene 3	5	2	0	0	0.181179	0.678357
GATCCATATGTCTTGAA	s	T	1	Hs.209989	BM977039:Hs.209989:Hs184: Full-length cDNA clone CS0DC021YB17 of Neuroblastoma Cot 25-normalized of Homo sapiens (human)	5	2	0	0	0.181179	0.678357
GATCATGGAAAGGCTGC	s	T	1	Hs.318938	BQ002419:Hs.318938:Hs184: Transcribed locus, moderately similar to NP_002175.2 interleukin 6 signal transducer isoform 1 precursor; membrane glycoprotein gp130; oncostatin M receptor; CD130 antigen; interleukin receptor beta chain; gp130 transducer chain;	5	5	0	0	0.181179	0.678357
GATCAACTGCTAGTCAC	s	T	1	Hs.209958	BQ008955:Hs.209958:Hs184: Protein BAP28	5	1	0	0	0.181179	0.678357
GATCCTCAGGAGATGAC	s	T	1	Hs.535786	BQ773946:Hs.535786:Hs184: Microtubule-associated protein 1B	5	1	0	0	0.181179	0.678357
GATCCGTACTTTTGTAA	s	T	1	Hs.349283	BU618461:Hs.349283:Hs184: Chromobox homolog 5 (HP1 alpha homolog, Drosophila)	5	2	0	0	0.181179	0.678357
GATCTTTCATGGGGCCA	s	T	1	Hs.125798	BX102181:Hs.125798:Hs184: Homo sapiens, Similar to neuronal thread protein, clone IMAGE:4102657, mRNA	5	5	0	0	0.181179	0.678357
GATCCAGGCGGGATGGA	s	T	1	Hs.98317	BX648772:Hs.98317:Hs184: CDNA clone IMAGE:3162229, partial cds	5	1	0	0	0.181179	0.678357
GATCCCTGAGCGGTCTC	s	T	1	Hs.135282	CB054974:Hs.135282:Hs184: CDNA FLJ11554 fis, clone HEMBA1003037	5	5	0	0	0.181179	0.678357
GATCTGCAGCCTGGAAG	s	T	1	Hs.439122	CB857917:Hs.439122:Hs184: Transcribed locus	5	5	0	0	0.181179	0.678357
GATCCTGATGTGTCCTT	s	T	1	Hs.269722	NM_153355:Hs.269722:Hs184: T-cell lymphoma breakpoint associated target 1	5	2	0	0	0.181179	0.678357
GATCCACACAATGGGGA	s	T	1	Hs.370498	NM_182585:Hs.370498:Hs184: Hypothetical protein DKFZp451M2119	5	5	0	0	0.181179	0.678357
GATCCAAACAACTATAG	s	T	1	Hs.12013	BX116792:Hs.12013:Hs184: ATP-binding cassette, sub-family E (OABP), member 1	5	5	2	2	0.630424	0.844415
GATCCAGAGTTCAGCAG	s	T	1	Hs.529095	AK022914:Hs.529095:Hs184: LOC440156	5	2	2	2	0.630424	0.844415
GATCCGGGAGCACACCG	s	T	1	Hs.1321	BC012390:Hs.1321:Hs184: Coagulation factor XII (Hageman factor)	5	2	2	2	0.630424	0.844415
GATCCTAGGACTGAATG	s	T	1	Hs.98041	NM_015346:Hs.98041:Hs184: Zinc finger, FYVE domain containing 26	5	2	2	2	0.630424	0.844415
GATCCTCCCATTGCAAC	s	T	1	Hs.50925	BF592155:Hs.50925:Hs184: Transcribed locus, weakly similar to XP_209041.2 PREDICTED: similar to KIAA1503 protein [Homo sapiens]	5	2	2	2	0.630424	0.844415
GATCTATTTGGTCTTTC	s	T	1	Hs.138860	NM_004308:Hs.138860:Hs184: Rho GTPase activating protein 1	5	5	4	4	0.630424	0.883973
GATCGCAGGATTTCCAA	s	T	1	Hs.260855	BC026346:Hs.260855:Hs184: NSE1	5	5	4	4	0.630424	0.883973
GATCCCTGTCAGATGAA	s	T	1	Hs.298716	BC032335:Hs.298716:Hs184: GCN1 general control of amino-acid synthesis 1-like 1 (yeast)	5	1	4	4	0.630424	0.883973
GATCCAACACTGCGAAG	s	T	1	Hs.444338	AL137700:Hs.444338:Hs184: Prematurely terminated mRNA decay factor-like	5	5	4	0	0.630424	0.883973
GATCGCTTTGCAAGGAT	s	T	1	Hs.435126	NM_020062:Hs.435126:Hs184: SLC2A4 regulator	5	5	4	4	0.630424	0.883973
GATCTACAGTAAGGGCT	s	T	1	Hs.143812	AL524200:Hs.143812:Hs184: Homo sapiens, clone IMAGE:6058191, mRNA	5	5	4	4	0.630424	0.883973
GATCCAGAATGTTTAGG	s	T	1	Hs.403933	BC022416:Hs.403933:Hs184: F-box protein 32	5	5	4	0	0.630424	0.883973
GATCCGAGCCACTTCTC	s	T	1	Hs.375957	BC092510:Hs.375957:Hs184: Integrin, beta 2 (antigen CD18 (p95), lymphocyte function-associated antigen 1; macrophage antigen 1 (mac-1) beta subunit)	5	5	4	4	0.630424	0.883973
GATCCATGAGCGCACGC	s	T	1	Hs.514980	CV813346:Hs.514980:Hs184: Sal-like 3 (Drosophila)	5	2	4	0	0.630424	0.883973
GATCCCCCACTGACCTC	s	T	1	Hs.541841	AW138043:Hs.541841:Hs184: Acyl-Coenzyme A dehydrogenase family, member 9	0	0	6	5	0.134721	0.686951
GATCCAACCATAGCTTG	s	T	1	Hs.207776	AA861145:Hs.207776:Hs184: Aspartylglucosaminidase	0	0	6	6	0.134721	0.686951
GATCTTTGAGGAAACAG	s	T	1	Hs.353175	AL122123:Hs.353175:Hs184: 1-acylglycerol-3-phosphate O-acyltransferase 4 (lysophosphatidic acid acyltransferase, delta)	0	0	6	5	0.134721	0.686951
GATCCAATTTACAGAAA	s	T	1	Hs.515406	AI971166:Hs.515406:Hs184: V-akt murine thymoma viral oncogene homolog 2	0	0	6	6	0.134721	0.686951
GATCCTTCTGCACCTAG	s	T	1	Hs.118654	BM968207:Hs.118654:Hs184: Homo sapiens, clone IMAGE:5271023, mRNA	0	0	6	2	0.134721	0.686951
GATCATACTAACGAGAA	s	T	1	Hs.444200	NM_004459:Hs.444200:Hs184: Fetal Alzheimer antigen	0	0	6	2	0.134721	0.686951
GATCCTGAGGCTGTTGG	s	T	1	Hs.112949	AK000220:Hs.112949:Hs184: Chromosome 1 open reading frame 34	0	0	6	2	0.134721	0.686951
GATCACCTTAGTTTGAT	s	T	1	Hs.472024	NM_001009923:Hs.472024:Hs184: Chromosome 20 open reading frame 30	0	0	6	5	0.134721	0.686951
GATCCGAAGCCAACACA	s	T	1	Hs.398178	BQ576160:Hs.398178:Hs184: Chromosome 4 open reading frame 9	0	0	6	5	0.134721	0.686951
GATCTAGTCTGTCCTGT	s	T	1	Hs.359978	BC046439:Hs.359978:Hs184: Hypothetical protein LOC286103	0	0	6	6	0.134721	0.686951
GATCCGCTGGAACCGCG	s	T	1	Hs.370984	BQ918063:Hs.370984:Hs184: Immunoglobulin superfamily, member 4C	0	0	6	6	0.134721	0.686951
GATCTGCATTTTGCCAG	s	T	1	Hs.292925	BU619287:Hs.292925:Hs184: KIAA1212	0	0	6	6	0.134721	0.686951
GATCTGACTGTCCTGAA	s	T	1	Hs.374421	AA521097:Hs.374421:Hs184: Chromosome 9 open reading frame 81	0	0	6	5	0.134721	0.686951
GATCATGCAGGCTGCCA	s	T	1	Hs.388236	CD580494:Hs.388236:Hs184: Capicua homolog (Drosophila)	0	0	6	2	0.134721	0.686951
GATCACGTTCCGTGAGC	s	T	1	Hs.82201	NM_001896:Hs.82201:Hs184: Casein kinase 2, alpha prime polypeptide	0	0	6	6	0.134721	0.686951
GATCTTGGGAAAATTGC	s	T	1	Hs.405614	NM_138455:Hs.405614:Hs184: Collagen triple helix repeat containing 1	0	0	6	5	0.134721	0.686951
GATCCCACCCGAACGTC	s	T	1	Hs.77367	BC025745:Hs.77367:Hs184: Chemokine (C-X-C motif) ligand 9	0	0	6	6	0.134721	0.686951
GATCTTCAGGGGAGCAG	s	T	1	Hs.336916	AI479366:Hs.336916:Hs184: Death-associated protein 6	0	0	6	2	0.134721	0.686951
GATCGTGTTTATGGTGA	s	T	1	Hs.549080	BC007073:Hs.549080:Hs184: Dolichyl-phosphate mannosyltransferase polypeptide 1, catalytic subunit	0	0	6	6	0.134721	0.686951
GATCATCCTGTGAGTTG	s	T	1	Hs.371597	NM_015522:Hs.371597:Hs184: Dynein 2 light intermediate chain	0	0	6	2	0.134721	0.686951
GATCTTCCAGGAGGACT	s	T	1	Hs.26880	NM_004826:Hs.26880:Hs184: Endothelin converting enzyme-like 1	0	0	6	6	0.134721	0.686951
GATCCTTCCGCTGCCGA	s	T	1	Hs.24601	AF217999:Hs.24601:Hs184: Fibulin 1	0	0	6	5	0.134721	0.686951
GATCCTAGGACTGGCAG	s	T	1	Hs.239370	AI810628:Hs.239370:Hs184: G-protein signalling modulator 1 (AGS3-like, C. elegans)	0	0	6	5	0.134721	0.686951
GATCTGAGGTCTTGCTG	s	T	1	Hs.412093	BC008057:Hs.412093:Hs184: Hypothetical protein LOC196996	0	0	6	5	0.134721	0.686951
GATCCGGGGCCCTCTCT	s	T	1	Hs.446318	BC061916:Hs.446318:Hs184: Homeo box A7	0	0	6	2	0.134721	0.686951
GATCCTAGCAGCCCTCC	s	T	1	Hs.424156	BC029160:Hs.424156:Hs184: Iroquois homeobox protein 1	0	0	6	6	0.134721	0.686951
GATCTACCTCCATAGAG	s	T	1	Hs.152385	BC073908:Hs.152385:Hs184: Hypothetical protein FLJ10980	0	0	6	2	0.134721	0.686951
GATCACCTTTCAGAGGA	s	T	1	Hs.469369	BC039374:Hs.469369:Hs184: Hypothetical LOC400988	0	0	6	6	0.134721	0.686951
GATCCCGACATGGAAGG	s	T	1	Hs.502814	BQ012354:Hs.502814:Hs184: LRP16 protein	0	0	6	6	0.134721	0.686951
GATCCCCATCAACCAGT	s	T	1	Hs.495138	AI241324:Hs.495138:Hs184: Mitogen-activated protein kinase associated protein 1	0	0	6	5	0.134721	0.686951
GATCATTCATTTCACCT	s	T	1	Hs.532824	BC007318:Hs.532824:Hs184: Microtubule-associated protein, RP/EB family, member 2	0	0	6	5	0.134721	0.686951
GATCTGTAATTCTCCCA	s	T	1	Hs.277035	AW291283:Hs.277035:Hs184: Monoglyceride lipase	0	0	6	6	0.134721	0.686951
GATCTATTTGAAGCTTC	s	T	1	Hs.518994	BC032642:Hs.518994:Hs184: NMDA receptor regulated 1	0	0	6	6	0.134721	0.686951
GATCCAAAGCAGATGAA	s	T	1	Hs.156178	NM_016134:Hs.156178:Hs184: Plasma glutamate carboxypeptidase	0	0	6	5	0.134721	0.686951
GATCTGGTAGCTTGGAG	s	T	1	Hs.511817	BM150844:Hs.511817:Hs184: Pleckstrin homology domain interacting protein	0	0	6	6	0.134721	0.686951
GATCAATGGTGTCACGG	s	T	1	Hs.408790	AB037163:Hs.408790:Hs184: Down syndrome critical region gene 5	0	0	6	6	0.134721	0.686951
GATCCGGTGGGGTGAAA	s	T	1	Hs.459855	NM_000303:Hs.459855:Hs184: Phosphomannomutase 2	0	0	6	6	0.134721	0.686951
GATCAACTGAGGAAGAT	s	T	1	Hs.492751	BC021571:Hs.492751:Hs184: Ring finger protein 139	0	0	6	2	0.134721	0.686951
GATCGTCTCTAGGATGA	s	T	1	Hs.180414	BM694039:Hs.180414:Hs184: Heat shock 70kDa protein 8	0	0	6	6	0.134721	0.686951
GATCCGTGGACAGAGGA	s	T	1	Hs.178551	BE873737:Hs.178551:Hs184: Ribosomal protein L8	0	0	6	5	0.134721	0.686951
GATCCCCACGGACCAGA	s	T	1	Hs.192854	CD250858:Hs.192854:Hs184: Rhotekin	0	0	6	5	0.134721	0.686951
GATCTGGTTTTATTCCT	s	T	1	Hs.476179	BC040242:Hs.476179:Hs184: SWI/SNF related, matrix associated, actin dependent regulator of chromatin, subfamily c, member 1	0	0	6	2	0.134721	0.686951
GATCCTCAGTGCGAGGA	s	T	1	Hs.459418	BX115855:Hs.459418:Hs184: Transcribed locus, strongly similar to XP_519593.1 PREDICTED: similar to EP2 protein variant D [Pan troglodytes]	0	0	6	2	0.134721	0.686951
GATCCAGCATGCCAATG	s	T	1	Hs.534352	BC002869:Hs.534352:Hs184: Syntaxin binding protein 2	0	0	6	5	0.134721	0.686951
GATCCACGAGCCCAAGG	s	T	1	Hs.1103	AW512491:Hs.1103:Hs184: Transforming growth factor, beta 1 (Camurati-Engelmann disease)	0	0	6	2	0.134721	0.686951
GATCCTGAGCCTGAAGG	s	T	1	Hs.487510	NM_145254:Hs.487510:Hs184: LOC124491	0	0	6	5	0.134721	0.686951
GATCCTAGGCAAGCTGG	s	T	1	Hs.524078	AF161520:Hs.524078:Hs184: Trafficking protein particle complex 4	0	0	6	6	0.134721	0.686951
GATCCTTCTGACTTTTC	s	T	1	Hs.50984	AA860771:Hs.50984:Hs184: Sarcoma amplified sequence	0	0	6	2	0.134721	0.686951
GATCATCCCAGCCATTG	s	T	1	Hs.533273	BU631954:Hs.533273:Hs184: Ubiquitin-activating enzyme E1 (A1S9T and BN75 temperature sensitivity complementing)	0	0	6	6	0.134721	0.686951
GATCATGACCACTAAAC	s	T	1	Hs.170737	NM_024818:Hs.170737:Hs184: Ubiquitin-activating enzyme E1-domain containing 1	0	0	6	5	0.134721	0.686951
GATCCCAAGGGACCCTC	s	T	1	Hs.202470	AA768419:Hs.202470:Hs184: UV radiation resistance associated gene	0	0	6	5	0.134721	0.686951
GATCAGTTTTCTGAGGA	s	T	1	Hs.546686	BF510568:Hs.546686:Hs184: Similar to KIAA0663 gene product	0	0	6	5	0.134721	0.686951
GATCATCTGTCCTCGGG	s	T	1	Hs.438919	AI924322:Hs.438919:Hs184: Transcribed locus	0	0	6	5	0.134721	0.686951
GATCAACCCTGACCCTG	s	T	1	Hs.380705	AK025975:Hs.380705:Hs184: CDNA FLJ38345 fis, clone FCBBF3028671	0	0	6	6	0.134721	0.686951
GATCTGCGTGCCTGGGC	s	T	1	Hs.253508	AW205798:Hs.253508:Hs184: P518 precursor protein	0	0	6	5	0.134721	0.686951
GATCTGCTGGCAGAGTA	s	T	1	Hs.190968	BC027976:Hs.190968:Hs184: Ribosomal protein S21	0	0	6	5	0.134721	0.686951
GATCCACCAGCGTCGGC	s	T	1	Hs.534386	BC041708:Hs.534386:Hs184: Leukocyte immunoglobulin-like receptor, subfamily B (with TM and ITIM domains), member 2	0	0	6	5	0.134721	0.686951
GATCCAGCAAGGAGCTG	s	T	1	Hs.436636	BF509020:Hs.436636:Hs184: Formin homology 2 domain containing 3	0	0	6	2	0.134721	0.686951
GATCCACCTCTCCTGTC	s	T	1	Hs.435979	BM666683:Hs.435979:Hs184: Transcribed locus	0	0	6	5	0.134721	0.686951
GATCTTCTCAAGTGGGA	s	T	1	Hs.529027	BM675304:Hs.529027:Hs184: Transcribed locus	0	0	6	2	0.134721	0.686951
GATCCACTGCCCACCCC	s	T	1	Hs.302051	BM717359:Hs.302051:Hs184: Myosin head domain containing 1	0	0	6	6	0.134721	0.686951
GATCCGGCCGGCTTTCC	s	T	1	Hs.25669	BX108779:Hs.25669:Hs184: Nuclear receptor coactivator 5	0	0	6	2	0.134721	0.686951
GATCCTTGAATTCTCCC	s	T	1	Hs.314263	CA748803:Hs.314263:Hs184: Fucosyltransferase 1 (galactoside 2-alpha-L-fucosyltransferase)	0	0	6	5	0.134721	0.686951
GATCCCCTCTGAGTGAC	s	T	1	Hs.483537	NM_152686:Hs.483537:Hs184: Hypothetical protein MGC29463	2	2	6	5	0.49943	0.848303
GATCCATGGAGCTAGAA	s	T	1	Hs.345139	NM_005261:Hs.345139:Hs184: GTP binding protein overexpressed in skeletal muscle	2	2	6	5	0.49943	0.848303
GATCTAGAAAGACTGCC	s	T	1	Hs.549412	BC052334:Hs.549412:Hs184: Similar to Serine/threonine-protein kinase PLK1 (Polo-like kinase 1) (PLK-1) (Serine-threonine protein kinase 13) (STPK13)	2	2	6	2	0.49943	0.848303
GATCCAAATGGATTACC	s	T	1	Hs.196437	AA527582:Hs.196437:Hs184: MOB1, Mps One Binder kinase activator-like 1B (yeast)	2	2	6	5	0.49943	0.848303
GATCCATGTGCAGTAAT	s	T	1	Hs.356371	NM_000991:Hs.356371:Hs184: Ribosomal protein L28	2	2	6	2	0.49943	0.848303
GATCATGTAGGGCTTAT	s	T	1	Hs.529591	BM984307:Hs.529591:Hs184: Translocation protein 1	2	2	6	6	0.49943	0.848303
GATCTACTGTGAAAGCC	s	T	1	Hs.514050	NM_138349:Hs.514050:Hs184: Hypothetical protein BC004507	2	2	6	5	0.49943	0.848303
GATCTTCCGCAAATCTG	s	T	1	Hs.128384	BC048006:Hs.128384:Hs184: Hypothetical protein FLJ13946	2	2	6	2	0.49943	0.848303
GATCATGTGACTTGCTT	s	T	1	Hs.269263	AF244571:Hs.269263:Hs184: KIAA0804	2	2	6	6	0.49943	0.848303
GATCCGGTGCTACGGGA	s	T	1	Hs.98704	NM_033254:Hs.98704:Hs184: Brother of CDO	3	3	6	5	0.49943	0.848303
GATCCAAACTTCCTGCA	s	T	1	Hs.127126	CB530001:Hs.127126:Hs184: Cytoplasmic polyadenylation element binding protein 4	3	3	6	2	0.49943	0.848303
GATCCCCCACCTCGGTC	s	T	1	Hs.196981	NM_002012:Hs.196981:Hs184: Fragile histidine triad gene	3	3	6	5	0.49943	0.848303
GATCCCTCCAAAATCAA	s	T	1	Hs.544577	BM453015:Hs.544577:Hs184: Glyceraldehyde-3-phosphate dehydrogenase	3	3	6	5	0.49943	0.848303
GATCTGCTTAGAGTGGA	s	T	1	Hs.7626	AI200681:Hs.7626:Hs184: Hypothetical protein LOC219854	3	0	6	2	0.49943	0.848303
GATCCGCGACGTGACCA	s	T	1	Hs.550535	AI674190:Hs.550535:Hs184: Hypothetical protein FLJ13941	3	3	6	2	0.49943	0.848303
GATCCTCCACGATTACG	s	T	1	Hs.280388	BC032939:Hs.280388:Hs184: Nephronophthisis 1 (juvenile)	3	3	6	5	0.49943	0.848303
GATCTTTGTAGTCAGGC	s	T	1	Hs.43899	BC016010:Hs.43899:Hs184: Transmembrane protein 18	3	0	6	6	0.49943	0.848303
GATCCTGGCAGCCGGTG	s	T	1	Hs.18573	NM_001107:Hs.18573:Hs184: Acylphosphatase 1, erythrocyte (common) type	5	5	6	6	0.910701	0.883973
GATCCTGGTGTTTCTAT	s	T	1	Hs.113150	NM_014990:Hs.113150:Hs184: GTPase activating Rap/RanGAP domain-like 1	5	2	6	2	0.910701	0.883973
GATCATGTAGCTGAGAC	s	T	1	Hs.159557	BC013257:Hs.159557:Hs184: Karyopherin alpha 2 (RAG cohort 1, importin alpha 1)	5	5	6	2	0.910701	0.883973
GATCGTTACTATGTGTC	s	T	1	Hs.534168	BC000266:Hs.534168:Hs184: NADH dehydrogenase (ubiquinone) 1 alpha subcomplex, 1, 7.5kDa	5	5	6	2	0.910701	0.883973
GATCCCCTTTGTGAAGC	s	T	1	Hs.531176	CX783006:Hs.531176:Hs184: Seryl-tRNA synthetase	5	2	6	2	0.910701	0.883973
GATCCCCTGAACTATTC	s	T	1	Hs.321653	BC014946:Hs.321653:Hs184: Hypothetical protein FLJ12770	5	5	6	5	0.910701	0.883973
GATCCCTCCAGTAACTG	s	T	1	Hs.386294	AL833722:Hs.386294:Hs184: Zinc finger protein 195	5	5	6	5	0.910701	0.883973
GATCGTGTCTTCAAGCA	s	T	1	Hs.397978	NM_138340:Hs.397978:Hs184: Abhydrolase domain containing 3	7	4	0	0	0.181179	0.618326
GATCAGCAAAACATTCA	s	T	1	Hs.58324	BU738180:Hs.58324:Hs184: A disintegrin-like and metalloprotease (reprolysin type) with thrombospondin type 1 motif, 5 (aggrecanase-2)	7	0	0	0	0.181179	0.618326
GATCATTGTCAGAACTT	s	T	1	Hs.468760	NM_001002243:Hs.468760:Hs184: Aftiphilin protein	7	7	0	0	0.181179	0.618326
GATCTGTTCAAACAGCA	s	T	1	Hs.502756	BC017483:Hs.502756:Hs184: AHNAK nucleoprotein (desmoyokin)	7	0	0	0	0.181179	0.618326
GATCCAGCCCATGGCAG	s	T	1	Hs.9613	BU502731:Hs.9613:Hs184: Angiopoietin-like 4	7	0	0	0	0.181179	0.618326
GATCCAAATAGAAGGGA	s	T	1	Hs.105016	NM_030816:Hs.105016:Hs184: Hypothetical protein DKFZp566D1346	7	0	0	0	0.181179	0.618326
GATCCAGGAGCACATAC	s	T	1	Hs.73708	NM_020349:Hs.73708:Hs184: Ankyrin repeat domain 2 (stretch responsive muscle)	7	0	0	0	0.181179	0.618326
GATCAGGTCTGTAAATG	s	T	1	Hs.86905	BC010960:Hs.86905:Hs184: ATPase, H+ transporting, lysosomal 42kDa, V1 subunit C, isoform 1	7	4	0	0	0.181179	0.618326
GATCCAGAAGTGGGGCA	s	T	1	Hs.13434	BC004114:Hs.13434:Hs184: ATP synthase mitochondrial F1 complex assembly factor 2	7	6	0	0	0.181179	0.618326
GATCAGCACCAACGATT	s	T	1	Hs.208681	BC027624:Hs.208681:Hs184: Bardet-Biedl syndrome 4	7	6	0	0	0.181179	0.618326
GATCCTTCCACCTTGGA	s	T	1	Hs.553613	NM_138278:Hs.553613:Hs184: BCL2/adenovirus E1B 19kD interacting protein like	7	7	0	0	0.181179	0.618326
GATCCATCCTCTCTCCT	s	T	1	Hs.408903	BC043484:Hs.408903:Hs184: Complement component 2	0	0	7	7	0.134721	0.636774
GATCAATGAACCATCTC	s	T	1	Hs.353013	BC032120:Hs.353013:Hs184: Chromosome 20 open reading frame 11	7	4	0	0	0.181179	0.618326
GATCTGAGGTTTTTAGA	s	T	1	Hs.530000	BC067810:Hs.530000:Hs184: Chromosome 7 open reading frame 28A	0	0	7	4	0.134721	0.636774
GATCCTGGCTAGAAGTG	s	T	1	Hs.494549	AI268413:Hs.494549:Hs184: Chromosome 9 open reading frame 130	7	4	0	0	0.181179	0.618326
GATCTACTCATTTGCTG	s	T	1	Hs.470882	NM_005795:Hs.470882:Hs184: Calcitonin receptor-like	0	0	7	4	0.134721	0.636774
GATCCAGCTTCATTATG	s	T	1	Hs.144913	AK027167:Hs.144913:Hs184: Hypothetical protein FLJ23514	0	0	7	0	0.134721	0.636774
GATCAACCCTTTCTCTC	s	T	1	Hs.25277	NM_022481:Hs.25277:Hs184: Centaurin, delta 3	0	0	7	4	0.134721	0.636774
GATCATGATAGACAAGA	s	T	1	Hs.161220	BC022188:Hs.161220:Hs184: Hypothetical gene CG018	7	0	0	0	0.181179	0.618326
GATCCGAGGGCAGCAGT	s	T	1	Hs.131434	AA100544:Hs.131434:Hs184: Coiled-coil-helix-coiled-coil-helix domain containing 3	7	3	0	0	0.181179	0.618326
GATCCGGTCAGCAGCCC	s	T	1	Hs.552587	NM_015127:Hs.552587:Hs184: Mid-1-related chloride channel 1	7	7	0	0	0.181179	0.618326
GATCTTCAGGACCTCGG	s	T	1	Hs.101302	BQ009414:Hs.101302:Hs184: Collagen, type XII, alpha 1	0	0	7	7	0.134721	0.636774
GATCTGTCATCCATATT	s	T	1	Hs.314543	U96136:Hs.314543:Hs184: Catenin (cadherin-associated protein), delta 2 (neural plakophilin-related arm-repeat protein)	7	0	0	0	0.181179	0.618326
GATCCCTGAGACGGGGT	s	T	1	Hs.512827	AF193040:Hs.512827:Hs184: Hypothetical protein DKFZp761E198	7	0	0	0	0.181179	0.618326
GATCACCGGCCGGGAGC	s	T	1	Hs.99922	BM722840:Hs.99922:Hs184: Dopamine receptor D4	7	3	0	0	0.181179	0.618326
GATCGTGTCAGTTTGTA	s	T	1	Hs.546250	BU934788:Hs.546250:Hs184: Dynein, cytoplasmic, intermediate polypeptide 2	7	0	0	0	0.181179	0.618326
GATCGTCCTCTTCTTCA	s	T	1	Hs.522823	NM_000117:Hs.522823:Hs184: Emerin (Emery-Dreifuss muscular dystrophy)	7	3	0	0	0.181179	0.618326
GATCCCACCAGCCCCAG	s	T	1	Hs.2375	NM_001974:Hs.2375:Hs184: Egf-like module containing, mucin-like, hormone receptor-like 1	0	0	7	8	0.134721	0.636774
GATCTTCCTGGTCTACT	s	T	1	Hs.167805	BC036529:Hs.167805:Hs184: Enhancer of polycomb homolog 1 (Drosophila)	7	3	0	0	0.181179	0.618326
GATCTCCTCAATCCTGT	s	T	1	Hs.534072	NM_031424:Hs.534072:Hs184: Chromosome 20 open reading frame 55	0	0	7	8	0.134721	0.636774
GATCTGGAGAGCATCTA	s	T	1	Hs.126825	NM_182623:Hs.126825:Hs184: Hypothetical protein FLJ36766	7	0	0	0	0.181179	0.618326
GATCCAGAGCAAGCACC	s	T	1	Hs.459573	BC063470:Hs.459573:Hs184: CXYorf1-related protein	7	7	0	0	0.181179	0.618326
GATCCCACCGAAGCAGC	s	T	1	Hs.362974	BC033851:Hs.362974:Hs184: FKSG44 gene	0	0	7	8	0.134721	0.636774
GATCTGAGCCCTGCACG	s	T	1	Hs.300834	BC041120:Hs.300834:Hs184: UDP-N-acetyl-alpha-D-galactosamine:polypeptide N-acetylgalactosaminyltransferase 2 (GalNAc-T2)	7	7	0	0	0.181179	0.618326
GATCCTTGGGGTCCACC	s	T	1	Hs.49427	AA855019:Hs.49427:Hs184: GEM interacting protein	7	0	0	0	0.181179	0.618326
GATCAAGAATTCTACCA	s	T	1	Hs.258576	NM_012129:Hs.258576:Hs184: Claudin 12	7	6	0	0	0.181179	0.618326
GATCGCATCTGTTAAAC	s	T	1	Hs.196952	AI288031:Hs.196952:Hs184: Hepatic leukemia factor	7	6	0	0	0.181179	0.618326
GATCACCATCCCCTAAA	s	T	1	Hs.487774	AI075972:Hs.487774:Hs184: Heterogeneous nuclear ribonucleoprotein A2/B1	0	0	7	7	0.134721	0.636774
GATCAGACAGAGTACCT	s	T	1	Hs.509736	BX464383:Hs.509736:Hs184: Heat shock 90kDa protein 1, beta	7	6	0	0	0.181179	0.618326
GATCTAAGGACTTCGAT	s	T	1	Hs.136905	BM994591:Hs.136905:Hs184: HECT, UBA and WWE domain containing 1	7	7	0	0	0.181179	0.618326
GATCCTGAAGCTTACTA	s	T	1	Hs.136338	NM_018725:Hs.136338:Hs184: Interleukin 17 receptor B	7	0	0	0	0.181179	0.618326
GATCCTGCAACACGAGC	s	T	1	Hs.469386	BC028361:Hs.469386:Hs184: Inositol polyphosphate-4-phosphatase, type I, 107kDa	7	3	0	0	0.181179	0.618326
GATCCTTGGAGGATTAG	s	T	1	Hs.521693	NM_017864:Hs.521693:Hs184: Hypothetical protein FLJ20530	0	0	7	8	0.134721	0.636774
GATCGCTGTAGTGCCTT	s	T	1	Hs.499205	BC034328:Hs.499205:Hs184: Iroquois homeobox protein 3	0	0	7	8	0.134721	0.636774
GATCTTCTATCTGTCGG	s	T	1	Hs.551505	BC062431:Hs.551505:Hs184: Janus kinase 1 (a protein tyrosine kinase)	7	6	0	0	0.181179	0.618326
GATCTGCATTGACACCA	s	T	1	Hs.144795	BX099866:Hs.144795:Hs184: Potassium large conductance calcium-activated channel, subfamily M, alpha member 1	7	6	0	0	0.181179	0.618326
GATCTCTGTGGATTGGT	s	T	1	Hs.509008	BC040179:Hs.509008:Hs184: KIAA1333	0	0	7	7	0.134721	0.636774
GATCCTCAGCCTTGCAG	s	T	1	Hs.141120	BC031355:Hs.141120:Hs184: Kruppel-like factor 8	7	3	0	0	0.181179	0.618326
GATCCGTGACCACATCA	s	T	1	Hs.497636	NM_000228:Hs.497636:Hs184: Laminin, beta 3	7	6	0	0	0.181179	0.618326
GATCCTGTTCTGCGCTG	s	T	1	Hs.494419	AA837930:Hs.494419:Hs184: Lysosomal-associated membrane protein 1	7	4	0	0	0.181179	0.618326
GATCCTCCAGCTCCGGG	s	T	1	Hs.1420	BX537709:Hs.1420:Hs184: Fibroblast growth factor receptor 3 (achondroplasia, thanatophoric dwarfism)	7	3	0	0	0.181179	0.618326
GATCCCAACTATCGCTT	s	T	1	Hs.475353	BC000646:Hs.475353:Hs184: LIM and cysteine-rich domains 1	0	0	7	7	0.134721	0.636774
GATCCAGCAATTTTGGT	s	T	1	Hs.64004	NM_203406:Hs.64004:Hs184: Similar to metallo-beta-lactamase superfamily protein	7	7	0	0	0.181179	0.618326
GATCCGCTCGCCAAAGG	s	T	1	Hs.43818	AI738566:Hs.43818:Hs184: Hypothetical protein LOC221710	7	3	0	0	0.181179	0.618326
GATCGCCTGGCTCCCAG	s	T	1	Hs.337266	AI828539:Hs.337266:Hs184: Hypothetical protein LOC284939	0	0	7	7	0.134721	0.636774
GATCTTTCCAGCAACTC	s	T	1	Hs.44289	CD364335:Hs.44289:Hs184: Hypothetical protein FLJ30469	7	4	0	0	0.181179	0.618326
GATCATTATTCTTGTAG	s	T	1	Hs.61271	CR749274:Hs.61271:Hs184: Hypothetical protein FLJ21159	0	0	7	7	0.134721	0.636774
GATCAACTATAAGCACA	s	T	1	Hs.444931	BC021101:Hs.444931:Hs184: Cofactor required for Sp1 transcriptional activation, subunit 6, 77kDa	7	6	0	0	0.181179	0.618326
GATCATTTCATCCAGTC	s	T	1	Hs.80976	NM_002417:Hs.80976:Hs184: Antigen identified by monoclonal antibody Ki-67	0	0	7	4	0.134721	0.636774
GATCTGGGCAGTTAGAT	s	T	1	Hs.533985	BF508670:Hs.533985:Hs184: Exocyst complex component 7	7	6	0	0	0.181179	0.618326
GATCAGGTTTGGTCACC	s	T	1	Hs.493919	BM677864:Hs.493919:Hs184: Myelin protein zero-like 1	7	7	0	0	0.181179	0.618326
GATCTTCTTCCGGGCTG	s	T	1	Hs.467142	BC018933:Hs.467142:Hs184: Myosin, heavy polypeptide 14	0	0	7	4	0.134721	0.636774
GATCTTCCGCCAGATGG	s	T	1	Hs.492427	BC063428:Hs.492427:Hs184: Neurocalcin delta	7	0	0	0	0.181179	0.618326
GATCATTGGCCGAGACC	s	T	1	Hs.77810	BC008857:Hs.77810:Hs184: Nuclear factor of activated T-cells, cytoplasmic, calcineurin-dependent 4	7	6	0	0	0.181179	0.618326
GATCATCGTTAGGGTGT	s	T	1	Hs.222494	BC005125:Hs.222494:Hs184: Hypothetical LOC79954	0	0	7	0	0.134721	0.636774
GATCGGCTTTAACGAAT	s	T	1	Hs.130438	BU623004:Hs.130438:Hs184: Odz, odd Oz/ten-m homolog 3 (Drosophila)	7	7	0	0	0.181179	0.618326
GATCCTGGACATTCTGT	s	T	1	Hs.30532	NM_016023:Hs.30532:Hs184: CGI-77 protein	7	0	0	0	0.181179	0.618326
GATCCAGAGCCTGCCAG	s	T	1	Hs.464912	BC000225:Hs.464912:Hs184: Hypothetical protein FLJ10656	0	0	7	7	0.134721	0.636774
GATCCTCATCTGCGGGA	s	T	1	Hs.460124	NM_001009936:Hs.460124:Hs184: PHD finger protein 19	0	0	7	7	0.134721	0.636774
GATCCAGCTCATCATCT	s	T	1	Hs.112160	AF108138:Hs.112160:Hs184: Chromosome 15 open reading frame 20	7	0	0	0	0.181179	0.618326
GATCATTAGTTGAATCG	s	T	1	Hs.480452	BC022803:Hs.480452:Hs184: Inorganic pyrophosphatase 2	7	7	0	0	0.181179	0.618326
GATCTTCTTGTTTTCTG	s	T	1	Hs.275086	NM_020228:Hs.275086:Hs184: PR domain containing 10	0	0	7	8	0.134721	0.636774
GATCCTTTGTGAGCAAG	s	T	1	Hs.524590	CA424848:Hs.524590:Hs184: RAB21, member RAS oncogene family	7	0	0	0	0.181179	0.618326
GATCTGGGGGCGGGGGG	s	T	1	Hs.522638	AI358083:Hs.522638:Hs184: Transcribed locus	7	7	0	0	0.181179	0.618326
GATCTGGCTGCGCTATG	s	T	1	Hs.337766	BP198317:Hs.337766:Hs184: Ribosomal protein L18a	0	0	7	7	0.134721	0.636774
GATCATTCTCGCCTCGT	s	T	1	Hs.499960	AI264285:Hs.499960:Hs184: SAR1a gene homolog 1 (S. cerevisiae)	7	0	0	0	0.181179	0.618326
GATCATAAAAGCAGCTA	s	T	1	Hs.480465	AI581178:Hs.480465:Hs184: Small inducible cytokine subfamily E, member 1 (endothelial monocyte-activating)	7	6	0	0	0.181179	0.618326
GATCAGAAGTGTAGCAG	s	T	1	Hs.335057	AW022196:Hs.335057:Hs184: Septin 2	7	6	0	0	0.181179	0.618326
GATCCGGCAGACAGGCA	s	T	1	Hs.369252	NM_153276:Hs.369252:Hs184: Solute carrier family 22 (organic anion transporter), member 6	7	4	0	0	0.181179	0.618326
GATCAAGCAATCCTTCC	s	T	1	Hs.232054	BC010661:Hs.232054:Hs184: Hypothetical protein FLJ10847	0	0	7	8	0.134721	0.636774
GATCCCGGCACTCTCTA	s	T	1	Hs.175220	NM_032803:Hs.175220:Hs184: Solute carrier family 7 (cationic amino acid transporter, y+ system), member 3	7	7	0	0	0.181179	0.618326
GATCCCTCATGGAGCTA	s	T	1	Hs.516830	NM_080725:Hs.516830:Hs184: Chromosome 20 open reading frame 139	0	0	7	8	0.134721	0.636774
GATCTATCTCACCGACG	s	T	1	Hs.499209	BC092440:Hs.499209:Hs184: Supervillin	7	6	0	0	0.181179	0.618326
GATCCATGAGTTTGCAC	s	T	1	Hs.518267	AV721941:Hs.518267:Hs184: Transferrin	7	7	0	0	0.181179	0.618326
GATCCAATGTGTGGAAC	s	T	1	Hs.443081	BM669178:Hs.443081:Hs184: THUMP domain containing 3	7	4	0	0	0.181179	0.618326
GATCCAGAAGAAAACAG	s	T	1	Hs.511686	AF007154:Hs.511686:Hs184: Talin 2	7	4	0	0	0.181179	0.618326
GATCACCAGTGGGCACT	s	T	1	Hs.475392	NM_018447:Hs.475392:Hs184: 30 kDa protein	0	0	7	7	0.134721	0.636774
GATCCTTTGGTAGTCAA	s	T	1	Hs.149168	NM_148957:Hs.149168:Hs184: Tumor necrosis factor receptor superfamily, member 19	0	0	7	7	0.134721	0.636774
GATCAGCTCACTACCAC	s	T	1	Hs.96530	BU617037:Hs.96530:Hs184: COX11 homolog, cytochrome c oxidase assembly protein (yeast)	7	7	0	0	0.181179	0.618326
GATCTTCCTCCAGTGAA	s	T	1	Hs.344812	NM_016381:Hs.344812:Hs184: Three prime repair exonuclease 1	7	4	0	0	0.181179	0.618326
GATCAACAAACTCAACA	s	T	1	Hs.436922	BQ645432:Hs.436922:Hs184: Ret finger protein 2	7	6	0	0	0.181179	0.618326
GATCATACAAATGCGGC	s	T	1	Hs.108049	AL834464:Hs.108049:Hs184: Uveal autoantigen with coiled-coil domains and ankyrin repeats	7	6	0	0	0.181179	0.618326
GATCCTGTTCTTCGTGC	s	T	1	Hs.324844	BG201728:Hs.324844:Hs184: Vitamin K epoxide reductase complex, subunit 1	0	0	7	4	0.134721	0.636774
GATCCAGAAATTGTGAA	s	T	1	Hs.520955	NM_030798:Hs.520955:Hs184: Williams-Beuren syndrome chromosome region 16	0	0	7	4	0.134721	0.636774
GATCCAGGAGATAATTG	s	T	1	Hs.549163	NM_016373:Hs.549163:Hs184: WW domain containing oxidoreductase	7	6	0	0	0.181179	0.618326
GATCCTGTTCTTGAAAA	s	T	1	Hs.553505	AL137603:Hs.553505:Hs184: Zinc finger protein, Y-linked	7	7	0	0	0.181179	0.618326
GATCCACACTGAAAGGA	s	T	1	Hs.357663	AL831871:Hs.357663:Hs184: Zinc finger protein 610	0	0	7	4	0.134721	0.636774
GATCCTTCAGCCTTCAG	s	T	1	Hs.153952	AA029388:Hs.153952:Hs184: 5'-nucleotidase, ecto (CD73)	7	4	0	0	0.181179	0.618326
GATCTAGTCTTTACTTT	s	T	1	Hs.314413	AA715298:Hs.314413:Hs184: Dedicator of cytokinesis 9	7	6	0	0	0.181179	0.618326
GATCCTCAGCAGCAGAG	s	T	1	Hs.177193	AA805912:Hs.177193:Hs184: Synaptotagmin IX	7	4	0	0	0.181179	0.618326
GATCATGTCAGTGGTGG	s	T	1	Hs.550803	AW003719:Hs.550803:Hs184: Transcribed locus	7	0	0	0	0.181179	0.618326
GATCCAGGAACCTCACT	s	T	1	Hs.433829	AW137582:Hs.433829:Hs184: Transcribed locus, moderately similar to XP_512541.1 PREDICTED: similar to hypothetical protein [Pan troglodytes]	7	0	0	0	0.181179	0.618326
GATCATGGATGTAGCAT	s	T	1	Hs.60257	AW293751:Hs.60257:Hs184: CDNA FLJ13598 fis, clone PLACE1009921	7	6	0	0	0.181179	0.618326
GATCTTCTTGGAGCGAG	s	T	1	Hs.487561	BC005922:Hs.487561:Hs184: Islet cell autoantigen 1, 69kDa	7	4	0	0	0.181179	0.618326
GATCCTGGGCATTTGAG	s	T	1	Hs.236449	BM981128:Hs.236449:Hs184: Family with sequence similarity 31, member C	7	0	0	0	0.181179	0.618326
GATCCAGCAACAGACAC	s	T	1	Hs.161757	BU681472:Hs.161757:Hs184: Hypothetical LOC400411	7	3	0	0	0.181179	0.618326
GATCTACAGATGTTGGA	s	T	1	Hs.183684	BX089936:Hs.183684:Hs184: Eukaryotic translation initiation factor 4 gamma, 2	7	0	0	0	0.181179	0.618326
GATCCGGCTTTCGGATT	s	T	1	Hs.222218	BX108030:Hs.222218:Hs184: Transcribed locus	7	0	0	0	0.181179	0.618326
GATCCCCAGTCTATTGG	s	T	1	Hs.191616	AA743345:Hs.191616:Hs184: Hypothetical protein MGC3040	0	0	7	0	0.134721	0.636774
GATCACCAGCCTGTCAC	s	T	1	Hs.180903	AI085813:Hs.180903:Hs184: Hypothetical protein 384D8_6	0	0	7	8	0.134721	0.636774
GATCTAGGAATTACTGT	s	T	1	Hs.508559	AY007114:Hs.508559:Hs184: Clone TCCCTA00151 mRNA sequence	0	0	7	8	0.134721	0.636774
GATCCTTCAGTGGACTC	s	T	1	Hs.396201	BX090295:Hs.396201:Hs184: Transcribed locus, strongly similar to XP_516059.1 PREDICTED: similar to chromosome 2 open reading frame 21 [Pan troglodytes]	0	0	7	4	0.134721	0.636774
GATCCACTGGATGTGGC	s	T	1	Hs.494406	BX096024:Hs.494406:Hs184: Hypothetical protein LOC349236	0	0	7	4	0.134721	0.636774
GATCCTGCGGACCCTGA	s	T	1	Hs.465642	NM_133327:Hs.465642:Hs184: Sema domain, transmembrane domain (TM), and cytoplasmic domain, (semaphorin) 6B	0	0	7	4	0.134721	0.636774
GATCCGGGACTGTCTGA	s	T	1	Hs.513807	NM_001012759:Hs.513807:Hs184: Family with sequence similarity 38, member A	2	2	7	8	0.49943	0.792038
GATCCTGCCCCTGCCTG	s	T	1	Hs.22011	NM_031910:Hs.22011:Hs184: C1q and tumor necrosis factor related protein 6	7	6	2	2	0.630424	0.779415
GATCCACTGAGTTAGTT	s	T	1	Hs.529862	AW449192:Hs.529862:Hs184: Full-length cDNA clone CS0DJ012YP16 of T cells (Jurkat cell line) Cot 10-normalized of Homo sapiens (human)	2	2	7	0	0.49943	0.792038
GATCATCTTTACAGTTC	s	T	1	Hs.372286	BC031844:Hs.372286:Hs184: Cullin 3	7	7	2	2	0.630424	0.779415
GATCCAGATTTCTTCTG	s	T	1	Hs.64691	BC014378:Hs.64691:Hs184: F-box protein 28	7	0	2	2	0.630424	0.779415
GATCATTGGTTGAGGGG	s	T	1	Hs.532401	BC058832:Hs.532401:Hs184: Golgi transport 1 homolog A (S. cerevisiae)	7	3	2	2	0.630424	0.779415
GATCCTTCATGAATAGC	s	T	1	Hs.535903	BC030566:Hs.535903:Hs184: Homo sapiens, clone IMAGE:5221709, mRNA	2	2	7	8	0.49943	0.792038
GATCATGACTTAGTGGG	s	T	1	Hs.436146	BC036405:Hs.436146:Hs184: KIAA1908 protein	2	2	7	8	0.49943	0.792038
GATCAAGAATTTCACAG	s	T	1	Hs.467133	NM_012346:Hs.467133:Hs184: Nucleoporin 62kDa	2	2	7	8	0.49943	0.792038
GATCATCGCAGACTGCG	s	T	1	Hs.434937	CA418669:Hs.434937:Hs184: Peptidylprolyl isomerase B (cyclophilin B)	7	6	2	2	0.630424	0.779415
GATCTTAGGAGAGGCCC	s	T	1	Hs.148670	NM_014836:Hs.148670:Hs184: Rho-related BTB domain containing 1	7	6	2	2	0.630424	0.779415
GATCAACTTTCTCAGCT	s	T	1	Hs.369779	NM_012238:Hs.369779:Hs184: Sirtuin (silent mating type information regulation 2 homolog) 1 (S. cerevisiae)	2	2	7	4	0.49943	0.792038
GATCCTAGGGTTCTTCA	s	T	1	Hs.167535	NM_003136:Hs.167535:Hs184: Signal recognition particle 54kDa	7	3	2	2	0.630424	0.779415
GATCTGCTTTTTGTCAC	s	T	1	Hs.522616	AL831996:Hs.522616:Hs184: Ubiquitously transcribed tetratricopeptide repeat, X chromosome	7	0	2	2	0.630424	0.779415
GATCCAGGAGACGGTCC	s	T	1	Hs.446172	NM_020863:Hs.446172:Hs184: Zinc finger protein 406	7	4	2	2	0.630424	0.779415
GATCATCCAACGGTTAA	s	T	1	Hs.304362	NM_024878:Hs.304362:Hs184: PHD finger protein 20-like 1	7	3	2	2	0.630424	0.779415
GATCCACACTTTCTGGT	s	T	1	Hs.551296	BC040975:Hs.551296:Hs184: CDNA clone IMAGE:4793048, partial cds	2	2	7	0	0.49943	0.792038
GATCCTGGCTAACACAG	s	T	1	Hs.152536	BQ181374:Hs.152536:Hs184: Proteasome regulatory particle subunit p44S10	2	2	7	7	0.49943	0.792038
GATCACCTGCATCTGGA	s	T	1	Hs.132340	NM_021945:Hs.132340:Hs184: Chromosome 6 open reading frame 85	7	6	4	4	0.630424	0.853335
GATCCTCCGATGTTCGC	s	T	1	Hs.477898	CA312094:Hs.477898:Hs184: Hermansky-Pudlak syndrome 3	7	4	4	4	0.630424	0.853335
GATCCGCCTCACACCTG	s	T	1	Hs.419	BC032558:Hs.419:Hs184: Distal-less homeo box 2	7	6	4	4	0.630424	0.853335
GATCTGTTCTGGGTGTT	s	T	1	Hs.483635	BI598882:Hs.483635:Hs184: Fibroblast growth factor 1 (acidic)	7	0	4	4	0.630424	0.853335
GATCCCGAATCCTGCGA	s	T	1	Hs.55977	BC007394:Hs.55977:Hs184: Hypothetical protein MGC16291	7	7	4	4	0.630424	0.853335
GATCCAGGCACAGCAGA	s	T	1	Hs.280987	BG195205:Hs.280987:Hs184: MutS homolog 3 (E. coli)	7	3	4	4	0.630424	0.853335
GATCCTGATTGTCAGGT	s	T	1	Hs.9788	BM353934:Hs.9788:Hs184: Nedd4 family interacting protein 1	7	4	4	4	0.630424	0.853335
GATCATCTCTCCTCGGT	s	T	1	Hs.522334	AA410986:Hs.522334:Hs184: Sushi, von Willebrand factor type A, EGF and pentraxin domain containing 1	7	0	4	4	0.630424	0.853335
GATCCCTGTAGAGGTGG	s	T	1	Hs.546324	BC012178:Hs.546324:Hs184: Guanine monphosphate synthetase	5	5	7	0	0.910701	0.85689
GATCCTGGAGCCAATGT	s	T	1	Hs.434682	BC040622:Hs.434682:Hs184: Hypothetical protein LOC340069	5	5	7	4	0.910701	0.85689
GATCCACCACAAGATGG	s	T	1	Hs.461647	BG254912:Hs.461647:Hs184: KIAA0182 protein	5	5	7	8	0.910701	0.85689
GATCCATTTCAAGGACT	s	T	1	Hs.233160	BC000658:Hs.233160:Hs184: Stanniocalcin 2	5	2	7	8	0.910701	0.85689
GATCCATTCTCCTGGGC	s	T	1	Hs.520073	NM_020861:Hs.520073:Hs184: Zinc finger and BTB domain containing 2	5	2	7	4	0.910701	0.85689
GATCATTTTGACAGTTT	s	T	1	Hs.241558	AA975236:Hs.241558:Hs184: Ariadne homolog 2 (Drosophila)	7	0	6	5	0.910701	0.853335
GATCACCTTTCACGTAC	s	T	1	Hs.501127	BC046219:Hs.501127:Hs184: Attractin-like 1	7	0	6	6	0.910701	0.853335
GATCATTTTGCATCTGT	s	T	1	Hs.525462	NM_016126:Hs.525462:Hs184: Chromosome 1 open reading frame 41	7	4	6	2	0.910701	0.853335
GATCCAGCCTGGGGTTG	s	T	1	Hs.130774	BC013747:Hs.130774:Hs184: F-box protein 10	7	6	6	6	0.910701	0.853335
GATCCTGGCAGCGAGGA	s	T	1	Hs.444467	AI565604:Hs.444467:Hs184: Eukaryotic translation elongation factor 1 gamma	7	4	6	6	0.910701	0.853335
GATCATCAGATGGTCGA	s	T	1	Hs.547222	CA412722:Hs.547222:Hs184: Transcribed locus, moderately similar to XP_512541.1 PREDICTED: similar to hypothetical protein [Pan troglodytes]	7	3	6	2	0.910701	0.853335
GATCCAGGCGGGGTTAT	s	T	1	Hs.42140	BC001242:Hs.42140:Hs184: De-etiolated homolog 1 (Arabidopsis)	7	6	7	8	0.910701	0.875747
GATCCCCATTTCCAAGG	s	T	1	Hs.73875	BC002527:Hs.73875:Hs184: Fumarylacetoacetate hydrolase (fumarylacetoacetase)	7	0	7	8	0.910701	0.875747
GATCCAGTGCACGGATG	s	T	1	Hs.5025	BM682374:Hs.5025:Hs184: Nebulette	7	3	7	8	0.910701	0.875747
GATCCTAGGGCGCCTCT	s	T	1	Hs.486095	NM_020381:Hs.486095:Hs184: Chromosome 6 open reading frame 210	7	3	7	8	0.910701	0.875747
GATCCGAAAACACTAGA	s	T	1	Hs.522449	AW138432:Hs.522449:Hs184: Protein-O-mannosyltransferase 1	7	4	7	0	0.910701	0.875747
GATCCTAACGTGCCAGT	s	T	1	Hs.27267	NM_178562:Hs.27267:Hs184: Hypothetical protein MGC50844	7	4	7	8	0.910701	0.875747
GATCAGGCATTTTGCCT	s	T	1	Hs.147794	BX110622:Hs.147794:Hs184: Transcribed locus	7	0	7	7	0.910701	0.875747
GATCTTTGAGCTTTGGC	s	T	1	Hs.255491	BC035834:Hs.255491:Hs184: Acid phosphatase-like 2	8	2	0	0	0.101495	0.618326
GATCTAGAAAGCAACTT	s	T	1	Hs.502773	BC001467:Hs.502773:Hs184: Membrane-type 1 matrix metalloproteinase cytoplasmic tail binding protein-1	8	8	0	0	0.101495	0.618326
GATCAACAGCTCCGCCT	s	T	1	Hs.117062	BC006121:Hs.117062:Hs184: Apoptosis-inducing factor (AIF)-like mitochondrion-associated inducer of death	8	8	0	0	0.101495	0.618326
GATCCTCCTCAGAAACT	s	T	1	Hs.80042	NM_013339:Hs.80042:Hs184: Asparagine-linked glycosylation 6 homolog (yeast, alpha-1,3-glucosyltransferase)	8	9	0	0	0.101495	0.618326
GATCAGCATTGAATGGT	s	T	1	Hs.435948	BU620803:Hs.435948:Hs184: ATPase family, AAA domain containing 1	8	1	0	0	0.101495	0.618326
GATCATCTACTCTTGCT	s	T	1	Hs.549269	BC006270:Hs.549269:Hs184: AF-1 specific protein phosphatase	8	8	0	0	0.101495	0.618326
GATCCTGCATCCAGGCA	s	T	1	Hs.436743	BC038360:Hs.436743:Hs184: Hypothetical protein FLJ36445	8	5	0	0	0.101495	0.618326
GATCCCAGAGGTGCATT	s	T	1	Hs.398178	BC032331:Hs.398178:Hs184: Chromosome 4 open reading frame 9	8	5	0	0	0.101495	0.618326
GATCCGAATACACTGGC	s	T	1	Hs.161916	AW451039:Hs.161916:Hs184: Chromosome 7 open reading frame 10	8	2	0	0	0.101495	0.618326
GATCTTCTAGCTACCAT	s	T	1	Hs.442592	BX647478:Hs.442592:Hs184: Casein kinase 1, alpha 1	8	9	0	0	0.101495	0.618326
GATCTAGAGTTCTGCCA	s	T	1	Hs.508292	CB851741:Hs.508292:Hs184: Hypothetical protein FLJ10514	8	8	0	0	0.101495	0.618326
GATCATGAAAAACGGGG	s	T	1	Hs.99348	NM_005221:Hs.99348:Hs184: Distal-less homeo box 5	8	2	0	0	0.101495	0.618326
GATCATCTGACCCTGGC	s	T	1	Hs.496205	BC048279:Hs.496205:Hs184: Hypothetical protein FLJ31204	8	2	0	0	0.101495	0.618326
GATCCTCAAGGACCTGT	s	T	1	Hs.187461	NM_178820:Hs.187461:Hs184: F-box protein 27	8	1	0	0	0.101495	0.618326
GATCTGGTCGGGCAAGA	s	T	1	Hs.142912	BM666204:Hs.142912:Hs184: Frizzled homolog 2 (Drosophila)	8	9	0	0	0.101495	0.618326
GATCCACTGTGTAGGCT	s	T	1	Hs.98206	BQ005641:Hs.98206:Hs184: Gremlin 2 homolog, cysteine knot superfamily (Xenopus laevis)	8	5	0	0	0.101495	0.618326
GATCCTGGAATTTCTCT	s	T	1	Hs.195040	BC012593:Hs.195040:Hs184: Hydroxysteroid (11-beta) dehydrogenase 1	8	1	0	0	0.101495	0.618326
GATCTTTGATAGTTGAG	s	T	1	Hs.471014	NM_002156:Hs.471014:Hs184: Heat shock 60kDa protein 1 (chaperonin)	8	5	0	0	0.101495	0.618326
GATCCATGTACAAAACT	s	T	1	Hs.374613	BQ006717:Hs.374613:Hs184: Inositol 1,4,5-triphosphate receptor, type 1	8	9	0	0	0.101495	0.618326
GATCATGACCCAATTCA	s	T	1	Hs.483486	NM_016604:Hs.483486:Hs184: Jumonji domain containing 1B	8	9	0	0	0.101495	0.618326
GATCGTCACCTCTGTGC	s	T	1	Hs.484099	AA464625:Hs.484099:Hs184: Potassium large conductance calcium-activated channel, subfamily M, beta member 1	8	1	0	0	0.101495	0.618326
GATCTGCTGCTGGTCTT	s	T	1	Hs.534590	BM974348:Hs.534590:Hs184: Potassium channel tetramerisation domain containing 13	8	5	0	0	0.101495	0.618326
GATCTTCAGGTTTCTAC	s	T	1	Hs.335139	NM_016121:Hs.335139:Hs184: Potassium channel tetramerisation domain containing 3	8	8	0	0	0.101495	0.618326
GATCCATTCAAACGCAC	s	T	1	Hs.161008	BC029937:Hs.161008:Hs184: Karyopherin alpha 1 (importin alpha 5)	8	1	0	0	0.101495	0.618326
GATCTGTGAGCTCTGGA	s	T	1	Hs.103110	BC036462:Hs.103110:Hs184: Similar to RIKEN cDNA 2210021J22	8	5	0	0	0.101495	0.618326
GATCTGCCTTTGGGGAG	s	T	1	Hs.521019	AL133568:Hs.521019:Hs184: MRNA; cDNA DKFZp434N197 (from clone DKFZp434N197)	8	2	0	0	0.101495	0.618326
GATCAACTGAAGACCCC	s	T	1	Hs.356460	BC007205:Hs.356460:Hs184: Homo sapiens, clone IMAGE:3626627, mRNA	8	2	0	0	0.101495	0.618326
GATCGCTGCTCAAGAGG	s	T	1	Hs.1116	BC026262:Hs.1116:Hs184: Lymphotoxin beta receptor (TNFR superfamily, member 3)	8	8	0	0	0.101495	0.618326
GATCCCTATGACCAAGT	s	T	1	Hs.239444	BC041411:Hs.239444:Hs184: Microtubule-associated protein 6	8	2	0	0	0.101495	0.618326
GATCTTGGGAGTTTTCT	s	T	1	Hs.127951	BC037165:Hs.127951:Hs184: Hypothetical protein FLJ14503	8	2	0	0	0.101495	0.618326
GATCTGCAATTCAGTTC	s	T	1	Hs.21757	AA730241:Hs.21757:Hs184: Mesoderm induction early response 1	8	8	0	0	0.101495	0.618326
GATCGTCAAGTCTTGCC	s	T	1	Hs.72964	BC044639:Hs.72964:Hs184: Makorin, ring finger protein, 3	8	9	0	0	0.101495	0.618326
GATCCCAGGGGCTACTT	s	T	1	Hs.418450	BU678208:Hs.418450:Hs184: Mitochondrial ribosomal protein L11	8	8	0	0	0.101495	0.618326
GATCTGTTGGCTGCCAT	s	T	1	Hs.513977	BU620529:Hs.513977:Hs184: 5',3'-nucleotidase, mitochondrial	8	5	0	0	0.101495	0.618326
GATCATTCAGCAGGACT	s	T	1	Hs.134491	NM_024928:Hs.134491:Hs184: Oligonucleotide/oligosaccharide-binding fold containing 1	8	9	0	0	0.101495	0.618326
GATCATTGCGCACTCAT	s	T	1	Hs.533339	BQ448083:Hs.533339:Hs184: Period homolog 3 (Drosophila)	8	1	0	0	0.101495	0.618326
GATCCATGAGGAAAAGA	s	T	1	Hs.523829	NM_021173:Hs.523829:Hs184: Polymerase (DNA-directed), delta 4	8	2	0	0	0.101495	0.618326
GATCACCAACCTCTTGA	s	T	1	Hs.549058	NM_002693:Hs.549058:Hs184: Polymerase (DNA directed), gamma	8	8	0	0	0.101495	0.618326
GATCCGCATTGATGCCA	s	T	1	Hs.438587	NM_148175:Hs.438587:Hs184: Peptidylprolyl isomerase (cyclophilin)-like 2	8	1	0	0	0.101495	0.618326
GATCGTATTCCCTGCTT	s	T	1	Hs.507475	NM_002913:Hs.507475:Hs184: Replication factor C (activator 1) 1, 145kDa	8	5	0	0	0.101495	0.618326
GATCTACCGACTCACTT	s	T	1	Hs.333503	NM_022781:Hs.333503:Hs184: Ring finger protein 38	8	1	0	0	0.101495	0.618326
GATCTTTGTGTCTCTGT	s	T	1	Hs.484222	AL080219:Hs.484222:Hs184: RNA terminal phosphate cyclase domain 1	8	9	0	0	0.101495	0.618326
GATCACTCCCACTAGGG	s	T	1	Hs.47517	NM_005619:Hs.47517:Hs184: Reticulon 2	8	9	0	0	0.101495	0.618326
GATCCTCAGCAACGAAC	s	T	1	Hs.59729	BM682144:Hs.59729:Hs184: Semaphorin sem2	8	2	0	0	0.101495	0.618326
GATCATGAGTCTGGCTC	s	T	1	Hs.445555	AF130470:Hs.445555:Hs184: Serine (or cysteine) proteinase inhibitor, clade I (pancpin), member 2	8	9	0	0	0.101495	0.618326
GATCTACTTGTAGTCAC	s	T	1	Hs.521482	AI247282:Hs.521482:Hs184: SHB (Src homology 2 domain containing) adaptor protein B	8	2	0	0	0.101495	0.618326
GATCCGGTTTGCGGTCT	s	T	1	Hs.307518	BC022968:Hs.307518:Hs184: KIAA1613 protein	8	8	0	0	0.101495	0.618326
GATCTGCAGGCATCTGG	s	T	1	Hs.514602	NM_052928:Hs.514602:Hs184: SET and MYND domain containing 4	8	1	0	0	0.101495	0.618326
GATCAACAGCTGGAGAT	s	T	1	Hs.43812	BC017237:Hs.43812:Hs184: Syntaxin 10	8	8	0	0	0.101495	0.618326
GATCCTGAGCCCTGACG	s	T	1	Hs.87968	BC032713:Hs.87968:Hs184: Toll-like receptor 9	8	2	0	0	0.101495	0.618326
GATCTCTGGTCAGAGTG	s	T	1	Hs.98475	NM_022152:Hs.98475:Hs184: PP1201 protein	8	8	0	0	0.101495	0.618326
GATCCTTACTCTGGGCC	s	T	1	Hs.190983	BC018707:Hs.190983:Hs184: Hypothetical protein FLJ14624	8	5	0	0	0.101495	0.618326
GATCCTTGGTTGAAAGG	s	T	1	Hs.253594	BM680766:Hs.253594:Hs184: Trichorhinophalangeal syndrome I	8	8	0	0	0.101495	0.618326
GATCAGTGGATATTAAG	s	T	1	Hs.355927	NM_003375:Hs.355927:Hs184: Voltage-dependent anion channel 2	8	5	0	0	0.101495	0.618326
GATCCCTGGACAGTGCT	s	T	1	Hs.60640	BC042143:Hs.60640:Hs184: Hypothetical protein FLJ32009	8	2	0	0	0.101495	0.618326
GATCACTTTGCAAATAT	s	T	1	Hs.530977	AI097560:Hs.530977:Hs184: Transcribed locus, weakly similar to XP_375099.1 PREDICTED: similar to hypothetical protein FLJ25224 [Homo sapiens]	8	2	0	0	0.101495	0.618326
GATCAACTGCAAACAGG	s	T	1	Hs.518611	BC035129:Hs.518611:Hs184: TBC1 domain family, member 14	8	9	0	0	0.101495	0.618326
GATCCAGAGGGCGGGAG	s	T	1	Hs.288478	BC037533:Hs.288478:Hs184: Homo sapiens, clone IMAGE:4214313, mRNA	8	9	0	0	0.101495	0.618326
GATCTGCTAATGAATTC	s	T	1	Hs.401218	BM973255:Hs.401218:Hs184: Transcribed locus, strongly similar to NP_000413.1 keratin 17 [Homo sapiens]	8	1	0	0	0.101495	0.618326
GATCCCCAGGTCCTGAG	s	T	1	Hs.554383	BQ022697:Hs.554383:Hs184: Transcribed locus	8	1	0	0	0.101495	0.618326
GATCTTCGTATCAGCCC	s	T	1	Hs.549060	BQ024565:Hs.549060:Hs184: Retinoschisis (X-linked, juvenile) 1	8	9	0	0	0.101495	0.618326
GATCCAATAGGAATATG	s	T	1	Hs.170131	BQ446588:Hs.170131:Hs184: Nuclear factor I/C (CCAAT-binding transcription factor)	8	9	0	0	0.101495	0.618326
GATCCAGAAAGTCACAG	s	T	1	Hs.134314	BQ772052:Hs.134314:Hs184: Full length insert cDNA clone ZD73D05	8	2	0	0	0.101495	0.618326
GATCAGTCTCCTCCCCA	s	T	1	Hs.369840	BU681710:Hs.369840:Hs184: Nidogen 2 (osteonidogen)	8	8	0	0	0.101495	0.618326
GATCCACTACATTGGAA	s	T	1	Hs.132721	BX641969:Hs.132721:Hs184: Transcribed locus	8	5	0	0	0.101495	0.618326
GATCCGTGGAACTACTG	s	T	1	Hs.103548	C14913:Hs.103548:Hs184: Transcribed locus	8	1	0	0	0.101495	0.618326
GATCCTCAGTGACCCCT	s	T	1	Hs.173679	NM_001004307:Hs.173679:Hs184: Hypothetical LOC339541	8	1	0	0	0.101495	0.618326
GATCCACTGGAACTCCA	s	T	1	Hs.491813	AY075022:Hs.491813:Hs184: Carbonic anhydrase VIII	8	2	2	2	0.373777	0.779415
GATCGCGCCATTGCACA	s	T	1	Hs.520937	BQ011352:Hs.520937:Hs184: Colony stimulating factor 2 receptor, alpha, low-affinity (granulocyte-macrophage)	8	8	2	2	0.373777	0.779415
GATCTGCTCACATTCCT	s	T	1	Hs.212140	BC016611:Hs.212140:Hs184: CWF19-like 2, cell cycle control (S. pombe)	8	1	2	2	0.373777	0.779415
GATCCCAGGAGAATCAG	s	T	1	Hs.191186	BC041893:Hs.191186:Hs184: Tetratricopeptide repeat domain 17	8	9	2	2	0.373777	0.779415
GATCCAGTAATCAATTT	s	T	1	Hs.404289	AI567185:Hs.404289:Hs184: Tropomodulin 1	8	2	2	2	0.373777	0.779415
GATCTTTGCTGTGCTGT	s	T	1	Hs.31474	CR749529:Hs.31474:Hs184: Hypothetical LOC402560	8	1	2	2	0.373777	0.779415
GATCCACCATGCCCGGG	s	T	1	Hs.350848	NM_207371:Hs.350848:Hs184: FLJ45187 protein	8	2	4	4	0.373777	0.853335
GATCCAGAGCTGATGCA	s	T	1	Hs.530792	AK223430:Hs.530792:Hs184: GTP cyclohydrolase I feedback regulator	8	5	4	0	0.373777	0.853335
GATCCTTGCTCCCCTGG	s	T	1	Hs.111779	BQ018477:Hs.111779:Hs184: Secreted protein, acidic, cysteine-rich (osteonectin)	8	2	4	4	0.373777	0.853335
GATCCAAGAGCTGACTA	s	T	1	Hs.436066	AV716866:Hs.436066:Hs184: Leukocyte specific transcript 1	8	2	6	2	0.747054	0.853335
GATCTGCCGTTCATGTT	s	T	1	Hs.490745	NM_058246:Hs.490745:Hs184: DnaJ (Hsp40) homolog, subfamily B, member 6	8	2	7	8	0.747054	0.875747
GATCCTGACTCGTTTGG	s	T	1	Hs.71913	AI471639:Hs.71913:Hs184: Transcribed locus	8	5	7	4	0.747054	0.875747
GATCATCCAGTTCTTCA	s	T	1	Hs.517307	BC014222:Hs.517307:Hs184: Myxovirus (influenza virus) resistance 1, interferon-inducible protein p78 (mouse)	8	2	7	8	0.747054	0.875747
GATCCTGACTCGAGGAA	s	T	1	Hs.18259	CB321968:Hs.18259:Hs184: XPA binding protein 1	8	2	7	0	0.747054	0.875747
GATCTCGAGTCTCGCAT	s	T	1	Hs.361323	BC009253:Hs.361323:Hs184: ATP-binding cassette, sub-family F (GCN20), member 3	0	0	9	2	0.0669655	0.594545
GATCTGTGGTGTTGGAT	s	T	1	Hs.131393	BC037897:Hs.131393:Hs184: Hypothetical protein LOC196394	0	0	9	9	0.0669655	0.594545
GATCCCTGTGGTGGTGT	s	T	1	Hs.444709	BM670894:Hs.444709:Hs184: Arylsulfatase I	0	0	9	9	0.0669655	0.594545
GATCCACATTATACCGG	s	T	1	Hs.368022	BC010493:Hs.368022:Hs184: Hypothetical protein FLJ11200	0	0	9	2	0.0669655	0.594545
GATCTGCATCAGTTGTA	s	T	1	Hs.128065	AA875996:Hs.128065:Hs184: Cathepsin C	0	0	9	9	0.0669655	0.594545
GATCACCGGGTGGTGGA	s	T	1	Hs.335551	AA639499:Hs.335551:Hs184: Dihydrolipoamide S-acetyltransferase (E2 component of pyruvate dehydrogenase complex)	0	0	9	5	0.0669655	0.594545
GATCTGCAGGCCACTGT	s	T	1	Hs.491354	N38742:Hs.491354:Hs184: Exostoses (multiple)-like 3	0	0	9	6	0.0669655	0.594545
GATCCTCCTGGGAGATG	s	T	1	Hs.438782	BU731440:Hs.438782:Hs184: Histone deacetylase 5	0	0	9	10	0.0669655	0.594545
GATCCTGCTGGCCAGAA	s	T	1	Hs.272805	NM_017878:Hs.272805:Hs184: HRAS-like suppressor 2	0	0	9	9	0.0669655	0.594545
GATCCTCAGAACACTGT	s	T	1	Hs.533723	NM_033547:Hs.533723:Hs184: Hypothetical gene MGC16733 similar to CG12113	0	0	9	2	0.0669655	0.594545
GATCCAGACTATCCTGG	s	T	1	Hs.469593	AL110164:Hs.469593:Hs184: LIM and senescent cell antigen-like domains 1	0	0	9	9	0.0669655	0.594545
GATCCTCCCACTTCTGC	s	T	1	Hs.157101	BC023538:Hs.157101:Hs184: Hypothetical gene supported by AK092138	0	0	9	2	0.0669655	0.594545
GATCATGTAGCTGAGGC	s	T	1	Hs.117853	AW474833:Hs.117853:Hs184: Hypothetical protein MGC40489	0	0	9	6	0.0669655	0.594545
GATCCAGTGGCCATGCC	s	T	1	Hs.926	AW576114:Hs.926:Hs184: Myxovirus (influenza virus) resistance 2 (mouse)	0	0	9	2	0.0669655	0.594545
GATCATGGCTAAGGCCT	s	T	1	Hs.435761	AA907130:Hs.435761:Hs184: Protein inhibitor of activated STAT, 3	0	0	9	10	0.0669655	0.594545
GATCTCCCTATGTTGTC	s	T	1	Hs.164162	NM_172069:Hs.164162:Hs184: Pleckstrin homology domain containing, family H (with MyTH4 domain) member 2	0	0	9	9	0.0669655	0.594545
GATCCCCCCTACAAGTT	s	T	1	Hs.23262	NM_005615:Hs.23262:Hs184: Ribonuclease, RNase A family, k6	0	0	9	10	0.0669655	0.594545
GATCAACTGATTTTTGT	s	T	1	Hs.213642	BM998011:Hs.213642:Hs184: Solute carrier family 35 (UDP-glucuronic acid/UDP-N-acetylgalactosamine dual transporter), member D1	0	0	9	9	0.0669655	0.594545
GATCTTTTCAGCTGTTC	s	T	1	Hs.103834	NM_024056:Hs.103834:Hs184: Hypothetical protein MGC5576	0	0	9	2	0.0669655	0.594545
GATCGTCGCCCAACTGG	s	T	1	Hs.530730	BC023622:Hs.530730:Hs184: Tankyrase 1 binding protein 1, 182kDa	0	0	9	10	0.0669655	0.594545
GATCTGGCAGGTTGGAT	s	T	1	Hs.368315	AA831363:Hs.368315:Hs184: Testis specific, 14	0	0	9	2	0.0669655	0.594545
GATCCTGTAGGAGCAAC	s	T	1	Hs.480848	AA814382:Hs.480848:Hs184: Ubiquitin specific protease 38	0	0	9	9	0.0669655	0.594545
GATCCTCAAGGTAGAGC	s	T	1	Hs.524767	BC091518:Hs.524767:Hs184: Zinc finger protein 684	0	0	9	2	0.0669655	0.594545
GATCTTCTTCAGAAGCT	s	T	1	Hs.432898	CB050876:Hs.432898:Hs184: Ribosomal protein L4	0	0	9	5	0.0669655	0.594545
GATCTGCTATGGGTCCA	s	T	1	Hs.480190	CR742243:Hs.480190:Hs184: Myeloid/lymphoid or mixed-lineage leukemia (trithorax homolog, Drosophila); translocated to, 2	0	0	9	2	0.0669655	0.594545
GATCCACACAGAAGGAG	s	T	1	Hs.483454	BM669529:Hs.483454:Hs184: Calponin 3, acidic	2	2	9	2	0.265396	0.734393
GATCTATTCTGAAGCTG	s	T	1	Hs.277533	NM_001011537:Hs.277533:Hs184: Forty-two-three domain containing 1	2	2	9	10	0.265396	0.734393
GATCCAGCTTTGGTCAT	s	T	1	Hs.132781	AI347487:Hs.132781:Hs184: Interleukin 27 receptor, alpha	2	2	9	10	0.265396	0.734393
GATCATTGTTATTGTGG	s	T	1	Hs.499833	BC018658:Hs.499833:Hs184: Chromosome 10 open reading frame 74	2	2	9	2	0.265396	0.734393
GATCCACTGCCGCTGGC	s	T	1	Hs.387804	BE243903:Hs.387804:Hs184: Poly(A) binding protein, cytoplasmic 1	2	2	9	9	0.265396	0.734393
GATCTTCTTGGCTGTGA	s	T	1	Hs.551837	BX109085:Hs.551837:Hs184: Transcribed locus, moderately similar to NP_060312.1 hypothetical protein FLJ20489 [Homo sapiens]	2	2	9	10	0.265396	0.734393
GATCCTGGGGCAGGGCT	s	T	1	Hs.435183	BC044247:Hs.435183:Hs184: G protein-coupled receptor 123	3	3	9	10	0.265396	0.734393
GATCTACTATGTGATGT	s	T	1	Hs.467701	BC014562:Hs.467701:Hs184: Ornithine decarboxylase 1	3	0	9	9	0.265396	0.734393
GATCTTCAGTCCCTCAG	s	T	1	Hs.438994	CD049472:Hs.438994:Hs184: Zinc finger protein 544	3	3	9	2	0.265396	0.734393
GATCATTTTCCTTGGGT	s	T	1	Hs.25723	BC023991:Hs.25723:Hs184: Mouse Mammary Turmor Virus Receptor homolog 1	5	2	9	2	0.566434	0.820362
GATCCAGAGCAGCCCCA	s	T	1	Hs.486596	AK025199:Hs.486596:Hs184: NHS-like 1	5	2	9	2	0.566434	0.820362
GATCCTATGATTGACAA	s	T	1	Hs.367854	NM_006109:Hs.367854:Hs184: SKB1 homolog (S. pombe)	5	5	9	10	0.566434	0.820362
GATCATGGACAATGGCT	s	T	1	Hs.515540	BM682306:Hs.515540:Hs184: Prostate tumor overexpressed gene 1	5	5	9	5	0.566434	0.820362
GATCCATGCCCATCCGA	s	T	1	Hs.528879	AW238625:Hs.528879:Hs184: Transcribed locus, strongly similar to XP_484573.1 similar to 60S ribosomal protein L26-like 1 [Mus musculus]	5	2	9	9	0.566434	0.820362
GATCACCTTCCCTTCTT	s	T	1	Hs.385913	AK025624:Hs.385913:Hs184: Acidic (leucine-rich) nuclear phosphoprotein 32 family, member E	7	6	9	2	0.566434	0.859563
GATCAACTCTCTAATGG	s	T	1	Hs.8360	NM_014039:Hs.8360:Hs184: PTD012 protein	7	4	9	9	0.566434	0.859563
GATCCTCCGTGACATTG	s	T	1	Hs.333388	BE747092:Hs.333388:Hs184: Eukaryotic translation elongation factor 1 delta (guanine nucleotide exchange protein)	7	0	9	5	0.566434	0.859563
GATCTTCTGTGTTTGGA	s	T	1	Hs.497573	AI215035:Hs.497573:Hs184: FLJ45244 protein	7	0	9	10	0.566434	0.859563
GATCCTTGTGGGCATTA	s	T	1	Hs.473317	BC040945:Hs.473317:Hs184: Chromosome 20 open reading frame 36	7	6	9	10	0.566434	0.859563
GATCCTCCTTTGAAAAA	s	T	1	Hs.159918	NM_001007157:Hs.159918:Hs184: PHD finger protein 14	7	0	9	5	0.566434	0.859563
GATCTAAAAACTCATCT	s	T	1	Hs.408461	BQ438803:Hs.408461:Hs184: DEAD (Asp-Glu-Ala-Asp) box polypeptide 6	7	6	9	5	0.566434	0.859563
GATCATTTGCAAACCTC	s	T	1	Hs.271272	AA782574:Hs.271272:Hs184: BTB (POZ) domain containing 11	8	8	9	9	0.890746	0.859563
GATCAAGTTTAAGTCAG	s	T	1	Hs.530331	BC002406:Hs.530331:Hs184: Pyruvate dehydrogenase (lipoamide) alpha 1	8	2	9	6	0.890746	0.859563
GATCCTAAGAGGTGGGT	s	T	1	Hs.513330	NM_015421:Hs.513330:Hs184: Chromosome 16 open reading frame 51	8	8	9	2	0.890746	0.859563
GATCCCAAAGCCAAACA	s	T	1	Hs.421474	BX640746:Hs.421474:Hs184: ATP-binding cassette, sub-family A (ABC1), member 5	10	4	0	0	0.101495	0.433224
GATCCATTCCTACGGTC	s	T	1	Hs.486520	BC020849:Hs.486520:Hs184: Aldehyde dehydrogenase 8 family, member A1	10	10	0	0	0.101495	0.433224
GATCTGTGGGAGTACAT	s	T	1	Hs.268787	BC051877:Hs.268787:Hs184: Ariadne homolog, ubiquitin-conjugating enzyme E2 binding protein, 1 (Drosophila)	10	0	0	0	0.101495	0.433224
GATCATGTAAGAGAAGC	s	T	1	Hs.58974	BC032691:Hs.58974:Hs184: Bardet-Biedl syndrome 7	10	10	0	0	0.101495	0.433224
GATCTGCATTCTCAGCT	s	T	1	Hs.364600	BC063412:Hs.364600:Hs184: Chromosome 21 open reading frame 128	10	7	0	0	0.101495	0.433224
GATCCACTACCACAACC	s	T	1	Hs.517478	BQ278669:Hs.517478:Hs184: Calcineurin binding protein 1	10	10	0	0	0.101495	0.433224
GATCCACCAAGAAGAGG	s	T	1	Hs.446684	BC028109:Hs.446684:Hs184: CD3E antigen, epsilon polypeptide associated protein	10	6	0	0	0.101495	0.433224
GATCCGCCCGAGTGCAG	s	T	1	Hs.534398	BU678702:Hs.534398:Hs184: COMM domain containing 3	10	3	0	0	0.101495	0.433224
GATCGTCGCCTGGACCC	s	T	1	Hs.503134	AF062481:Hs.503134:Hs184: 7-dehydrocholesterol reductase	10	10	0	0	0.101495	0.433224
GATCTGCTGTCGCTAGC	s	T	1	Hs.195403	CA445564:Hs.195403:Hs184: Dedicator of cytokinesis 5	10	0	0	0	0.101495	0.433224
GATCCTGGCTAGAATGA	s	T	1	Hs.546253	NM_004462:Hs.546253:Hs184: Farnesyl-diphosphate farnesyltransferase 1	10	0	0	0	0.101495	0.433224
GATCTTCTGTCTTCTGC	s	T	1	Hs.481936	NM_023073:Hs.481936:Hs184: Hypothetical protein FLJ13231	10	4	0	0	0.101495	0.433224
GATCCTTATCACAGGTG	s	T	1	Hs.278500	CV803996:Hs.278500:Hs184: Glucosamine-6-phosphate deaminase 1	10	10	0	0	0.101495	0.433224
GATCTGTTTCCTACAGA	s	T	1	Hs.481852	BC020597:Hs.481852:Hs184: General transcription factor IIB	10	3	0	0	0.101495	0.433224
GATCATTTTCTGTAACA	s	T	1	Hs.508848	BC071943:Hs.508848:Hs184: Heterogeneous nuclear ribonucleoprotein C (C1/C2)	10	6	0	0	0.101495	0.433224
GATCCAAAGGGTCAGCC	s	T	1	Hs.5333	AW168269:Hs.5333:Hs184: KIAA0711 gene product	10	3	0	0	0.101495	0.433224
GATCCAGGGAATGAAAA	s	T	1	Hs.507074	NM_014730:Hs.507074:Hs184: KIAA0152	10	4	0	0	0.101495	0.433224
GATCCCTGAGCCTCTGG	s	T	1	Hs.445377	BM664740:Hs.445377:Hs184: Similar to Retinol dehydrogenase 12	10	0	0	0	0.101495	0.433224
GATCAACCTGACCGGAG	s	T	1	Hs.444594	BC007594:Hs.444594:Hs184: Hypothetical protein LOC283849	10	10	0	0	0.101495	0.433224
GATCCGCCCCCCCTTAG	s	T	1	Hs.351680	BC067230:Hs.351680:Hs184: Homo sapiens, clone IMAGE:5274897, mRNA	10	10	0	0	0.101495	0.433224
GATCTTTGTTCAGCCAA	s	T	1	Hs.495138	AA832463:Hs.495138:Hs184: Mitogen-activated protein kinase associated protein 1	10	0	0	0	0.101495	0.433224
GATCCTCCTTTACATAG	s	T	1	Hs.481307	NM_024629:Hs.481307:Hs184: MLF1 interacting protein	10	10	0	0	0.101495	0.433224
GATCATCCAGCCCAGCC	s	T	1	Hs.286226	BG251821:Hs.286226:Hs184: Myosin IC	10	0	0	0	0.101495	0.433224
GATCTAGCATCTCTGAA	s	T	1	Hs.443683	NM_003970:Hs.443683:Hs184: Myomesin (M-protein) 2, 165kDa	10	3	0	0	0.101495	0.433224
GATCATGCGGAGCCGGC	s	T	1	Hs.173024	BC046354:Hs.173024:Hs184: NEDD8 ultimate buster-1	10	10	0	0	0.101495	0.433224
GATCACCTCGATGACTC	s	T	1	Hs.180591	NM_138285:Hs.180591:Hs184: Nucleoporin 35kDa	10	3	0	0	0.101495	0.433224
GATCCAGCTTTCTCCTT	s	T	1	Hs.444870	NM_006190:Hs.444870:Hs184: Origin recognition complex, subunit 2-like (yeast)	10	7	0	0	0.101495	0.433224
GATCCCCATTGTGTATG	s	T	1	Hs.413238	NM_000290:Hs.413238:Hs184: Phosphoglycerate mutase 2 (muscle)	10	10	0	0	0.101495	0.433224
GATCCTTGATGAGCCAA	s	T	1	Hs.517044	AI926894:Hs.517044:Hs184: PHD finger protein 20	10	0	0	0	0.101495	0.433224
GATCCAGGTCTCCAATT	s	T	1	Hs.373560	BC009644:Hs.373560:Hs184: Protein phosphatase 1M (PP2C domain containing)	10	4	0	0	0.101495	0.433224
GATCATCTAATGTTGAG	s	T	1	Hs.518326	AA724890:Hs.518326:Hs184: Stress-associated endoplasmic reticulum protein 1	10	10	0	0	0.101495	0.433224
GATCCAGAGGGACTTCA	s	T	1	Hs.444445	AW026099:Hs.444445:Hs184: SWI/SNF related, matrix associated, actin dependent regulator of chromatin, subfamily d, member 3	10	6	0	0	0.101495	0.433224
GATCACTGTGGTTGGGT	s	T	1	Hs.24553	NM_022369:Hs.24553:Hs184: Stimulated by retinoic acid gene 6 homolog (mouse)	10	3	0	0	0.101495	0.433224
GATCCTTGTTAGTGTAG	s	T	1	Hs.500598	BC064323:Hs.500598:Hs184: TBC1 domain family, member 12	10	7	0	0	0.101495	0.433224
GATCTAGACTGAGAATC	s	T	1	Hs.325667	NM_018676:Hs.325667:Hs184: Thrombospondin, type I, domain containing 1	10	10	0	0	0.101495	0.433224
GATCCAACCGACTGAAT	s	T	1	Hs.82128	NM_006670:Hs.82128:Hs184: Trophoblast glycoprotein	10	10	0	0	0.101495	0.433224
GATCGCTGTACCGCTCC	s	T	1	Hs.510528	AF110908:Hs.510528:Hs184: TNF receptor-associated factor 3	10	10	0	0	0.101495	0.433224
GATCTTCAAAAGTAATG	s	T	1	Hs.441664	BI494344:Hs.441664:Hs184: Tetraspanin 7	10	0	0	0	0.101495	0.433224
GATCCAAGCCTTGCACA	s	T	1	Hs.531249	BU741911:Hs.531249:Hs184: Ubiquitin specific protease 35	10	3	0	0	0.101495	0.433224
GATCCAGAGGACCAGAG	s	T	1	Hs.443330	BC023556:Hs.443330:Hs184: Vaccinia related kinase 3	10	3	0	0	0.101495	0.433224
GATCATCACCAGCGGAA	s	T	1	Hs.232270	BC025392:Hs.232270:Hs184: Hypothetical protein LOC146845	10	4	0	0	0.101495	0.433224
GATCTGACGCCAGTGAA	s	T	1	Hs.520974	BI495132:Hs.520974:Hs184: Tyrosine 3-monooxygenase/tryptophan 5-monooxygenase activation protein, gamma polypeptide	10	0	0	0	0.101495	0.433224
GATCACTTTTCCTGCCT	s	T	1	Hs.200063	AA251381:Hs.200063:Hs184: Histone deacetylase 7A	10	3	0	0	0.101495	0.433224
GATCATGCCCTTTTGTA	s	T	1	Hs.355581	AA418119:Hs.355581:Hs184: Zinc finger protein 297B	10	7	0	0	0.101495	0.433224
GATCATTTGCAACAACA	s	T	1	Hs.406377	AA828532:Hs.406377:Hs184: Hypothetical protein DKFZp762N1910	10	10	0	0	0.101495	0.433224
GATCGTGTGTGTAAACA	s	T	1	Hs.151675	AI125744:Hs.151675:Hs184: Chromosome 20 open reading frame 142	10	10	0	0	0.101495	0.433224
GATCCCAAAGTTGATAA	s	T	1	Hs.526470	AL109700:Hs.526470:Hs184: CDNA FLJ37610 fis, clone BRCOC2011398	10	4	0	0	0.101495	0.433224
GATCATGAGCATTTTCC	s	T	1	Hs.382105	BC037339:Hs.382105:Hs184: CDNA clone IMAGE:5265056, partial cds	10	4	0	0	0.101495	0.433224
GATCTGCCTTTCTAGCC	s	T	1	Hs.448418	BC062752:Hs.448418:Hs184: Heat shock transcription factor, Y linked 2	10	10	0	0	0.101495	0.433224
GATCCTTCTGGAGAATC	s	T	1	Hs.76781	BM684052:Hs.76781:Hs184: ATP-binding cassette, sub-family D (ALD), member 3	10	4	0	0	0.101495	0.433224
GATCCCCAAATCATCAC	s	T	1	Hs.40289	BQ186485:Hs.40289:Hs184: Homo sapiens, clone IMAGE:5267398, mRNA	10	10	0	0	0.101495	0.433224
GATCGTTTTCTGGATTC	s	T	1	Hs.149363	BQ447556:Hs.149363:Hs184: Homo sapiens, clone IMAGE:5266794, mRNA	10	0	0	0	0.101495	0.433224
GATCCATATGTACTTGG	s	T	1	Hs.169812	BQ774537:Hs.169812:Hs184: Full-length cDNA clone CS0CAP006YP08 of Thymus of Homo sapiens (human)	10	0	0	0	0.101495	0.433224
GATCCGTGAGTGGAAGG	s	T	1	Hs.471637	AA846909:Hs.471637:Hs184: Hypothetical protein MGC42174	10	7	2	2	0.373777	0.688701
GATCTACTTTCACATTC	s	T	1	Hs.501629	NM_004907:Hs.501629:Hs184: Immediate early response 2	10	10	4	4	0.373777	0.810937
GATCCCAGGGGATGGGG	s	T	1	Hs.549216	NM_033309:Hs.549216:Hs184: Hypothetical protein MGC4655	10	0	4	4	0.373777	0.810937
GATCTTCACGATTACCG	s	T	1	Hs.271876	BC009074:Hs.271876:Hs184: CGI-62 protein	10	0	6	5	0.747054	0.810937
GATCTGGAGAAGTGGTG	s	T	1	Hs.487925	BC025406:Hs.487925:Hs184: Phosphodiesterase 4D interacting protein (myomegalin)	10	0	6	2	0.747054	0.810937
GATCAACATCCACAGCG	s	T	1	Hs.458414	BC000897:Hs.458414:Hs184: Interferon induced transmembrane protein 1 (9-27)	10	4	9	9	0.890746	0.871292
GATCCCCTTCTTTCCCA	s	T	1	Hs.31931	NM_173630:Hs.31931:Hs184: Rotatin	10	10	9	5	0.890746	0.871292
GATCCGGGACACCCACA	s	T	1	Hs.131433	NM_139025:Hs.131433:Hs184: A disintegrin-like and metalloprotease (reprolysin type) with thrombospondin type 1 motif, 13	0	0	11	11	0.0669655	0.594545
GATCAACTCAGGGAAAC	s	T	1	Hs.503438	BC062729:Hs.503438:Hs184: Hypothetical protein FLJ37874	0	0	11	8	0.0669655	0.594545
GATCCTGATACCAAACT	s	T	1	Hs.524741	BM550338:Hs.524741:Hs184: Actin related protein 2/3 complex, subunit 3, 21kDa	0	0	11	0	0.0669655	0.594545
GATCGTTTATTCTTCAG	s	T	1	Hs.435948	BC073998:Hs.435948:Hs184: ATPase family, AAA domain containing 1	0	0	11	0	0.0669655	0.594545
GATCTCCTTCCCTCCTT	s	T	1	Hs.9754	BI260738:Hs.9754:Hs184: Activating transcription factor 5	0	0	11	7	0.0669655	0.594545
GATCCTGGACCTGATGA	s	T	1	Hs.528131	NM_017970:Hs.528131:Hs184: Chromosome 14 open reading frame 102	0	0	11	11	0.0669655	0.594545
GATCTACAGTCTCCCTG	s	T	1	Hs.348112	BC051762:Hs.348112:Hs184: Chromosome 20 open reading frame 96	0	0	11	7	0.0669655	0.594545
GATCATGCTCCTCACCA	s	T	1	Hs.243564	NM_001778:Hs.243564:Hs184: CD48 antigen (B-cell membrane protein)	0	0	11	11	0.0669655	0.594545
GATCCTTAAGATTTTGG	s	T	1	Hs.101014	AY239292:Hs.101014:Hs184: Translokin	0	0	11	7	0.0669655	0.594545
GATCCTCAGTGACCATG	s	T	1	Hs.194333	NM_004091:Hs.194333:Hs184: E2F transcription factor 2	0	0	11	3	0.0669655	0.594545
GATCCCCATCTGAGCCT	s	T	1	Hs.171596	NM_004431:Hs.171596:Hs184: EPH receptor A2	0	0	11	0	0.0669655	0.594545
GATCCTGGGAAACAAAT	s	T	1	Hs.17631	BC035962:Hs.17631:Hs184: Chromosome 2 open reading frame 31	0	0	11	0	0.0669655	0.594545
GATCCTGCCAGACAGCA	s	T	1	Hs.463278	AF229796:Hs.463278:Hs184: Golgi SNAP receptor complex member 2	0	0	11	11	0.0669655	0.594545
GATCTGCCTTTTCAGAA	s	T	1	Hs.97858	BC063684:Hs.97858:Hs184: Kinesin family member 1B	0	0	11	11	0.0669655	0.594545
GATCCATCCTGCTAGCA	s	T	1	Hs.86092	BC007753:Hs.86092:Hs184: Myosin light chain kinase 2, skeletal muscle	0	0	11	0	0.0669655	0.594545
GATCCCACCTTCAACCC	s	T	1	Hs.506374	CN308376:Hs.506374:Hs184: 13kDa differentiation-associated protein	0	0	11	11	0.0669655	0.594545
GATCCCCCAAGGATGCA	s	T	1	Hs.466804	BM662706:Hs.466804:Hs184: Phospholipase A2, group IIA (platelets, synovial fluid)	0	0	11	4	0.0669655	0.594545
GATCCTGTGAGAATGTG	s	T	1	Hs.436518	NM_194272:Hs.436518:Hs184: RNA binding protein with multiple splicing 2	0	0	11	0	0.0669655	0.594545
GATCTGCTACCGGCGCC	s	T	1	Hs.160550	NM_152346:Hs.160550:Hs184: Solute carrier family 43, member 2	0	0	11	11	0.0669655	0.594545
GATCCTTGCTGCTGCAA	s	T	1	Hs.443752	BX640723:Hs.443752:Hs184: Proprotein convertase subtilisin/kexin type 7	0	0	11	11	0.0669655	0.594545
GATCCTCCCCGCATAAT	s	T	1	Hs.93832	AA897590:Hs.93832:Hs184: Putative membrane protein	0	0	11	11	0.0669655	0.594545
GATCATTTGCAATGGAA	s	T	1	Hs.434367	NM_003330:Hs.434367:Hs184: Thioredoxin reductase 1	0	0	11	11	0.0669655	0.594545
GATCATGTTGTTGATGG	s	T	1	Hs.98510	NM_019045:Hs.98510:Hs184: WD repeat domain 44	0	0	11	0	0.0669655	0.594545
GATCGGTGCTAGTGGTA	s	T	1	Hs.208715	AI809544:Hs.208715:Hs184: Transcribed locus	0	0	11	7	0.0669655	0.594545
GATCTGCTCTGTGTCAC	s	T	1	Hs.26297	BM666975:Hs.26297:Hs184: Transcribed locus	0	0	11	11	0.0669655	0.594545
GATCACCACAACTGGCT	s	T	1	Hs.531822	CA314295:Hs.531822:Hs184: Hypothetical protein LOC150759	0	0	11	11	0.0669655	0.594545
GATCCTGCATTTCAGGT	s	T	1	Hs.435369	CN482578:Hs.435369:Hs184: Four and a half LIM domains 1	0	0	11	11	0.0669655	0.594545
GATCCGCGCTGGAGATT	s	T	1	Hs.552239	CV811826:Hs.552239:Hs184: Transcribed locus, weakly similar to NP_060312.1 hypothetical protein FLJ20489 [Homo sapiens]	0	0	11	0	0.0669655	0.594545
GATCCTGTTCTGAGCAA	s	T	1	Hs.75798	AA587896:Hs.75798:Hs184: Chromosome 20 open reading frame 111	2	2	11	3	0.265396	0.734393
GATCCTGTCTTTAGCTC	s	T	1	Hs.159556	BC044641:Hs.159556:Hs184: Hypothetical protein MGC61716	2	2	11	0	0.265396	0.734393
GATCTTTGGTGTCCTGG	s	T	1	Hs.460996	NM_003789:Hs.460996:Hs184: TNFRSF1A-associated via death domain	2	2	11	3	0.265396	0.734393
GATCATTTGATTCTGTG	s	T	1	Hs.442736	BU682476:Hs.442736:Hs184: Transcribed locus, moderately similar to XP_209041.2 PREDICTED: similar to KIAA1503 protein [Homo sapiens]	2	2	11	0	0.265396	0.734393
GATCATGTGGTGGATTC	s	T	1	Hs.379386	NM_001009937:Hs.379386:Hs184: Solute carrier family 25, member 26	2	2	11	3	0.265396	0.734393
GATCCCGCCTCTGCCTG	s	T	1	Hs.159428	BQ000018:Hs.159428:Hs184: BCL2-associated X protein	3	3	11	11	0.265396	0.734393
GATCATCCTGCTTGACT	s	T	1	Hs.368486	AA530973:Hs.368486:Hs184: Apical protein-like (Xenopus laevis)	3	3	11	0	0.265396	0.734393
GATCCCTCCCCACTGAC	s	T	1	Hs.468702	NM_152516:Hs.468702:Hs184: Copper metabolism (Murr1) domain containing 1	5	5	11	0	0.566434	0.820362
GATCAGCAAGTGTCCTT	s	T	1	Hs.477866	NM_000935:Hs.477866:Hs184: Procollagen-lysine, 2-oxoglutarate 5-dioxygenase 2	5	2	11	11	0.566434	0.820362
GATCCATACTGGGGAGA	s	T	1	Hs.135052	NM_194325:Hs.135052:Hs184: Zinc finger protein 30 (KOX 28)	5	2	11	3	0.566434	0.820362
GATCCCTTGGCATCGTC	s	T	1	Hs.157277	AW263247:Hs.157277:Hs184: Zinc finger protein 496	5	1	11	3	0.566434	0.820362
GATCATGTTCAGCCCTG	s	T	1	Hs.77873	BC011578:Hs.77873:Hs184: CD276 antigen	7	0	11	3	0.566434	0.859563
GATCCACTTGGAAAAGG	s	T	1	Hs.534491	BC008882:Hs.534491:Hs184: Hypothetical protein FLJ13909	8	1	11	8	0.890746	0.859563
GATCTGCCCTGTGTTAT	s	T	1	Hs.292356	BC032720:Hs.292356:Hs184: Cytochrome b-245, beta polypeptide (chronic granulomatous disease)	8	1	11	3	0.890746	0.859563
GATCATGGACCTTCTGG	s	T	1	Hs.95231	NM_013241:Hs.95231:Hs184: Formin homology 2 domain containing 1	8	9	11	3	0.890746	0.859563
GATCCTGTGTATAACAT	s	T	1	Hs.390738	BC012082:Hs.390738:Hs184: Hypothetical protein FLJ20366	8	2	11	0	0.890746	0.859563
GATCTGGATTGGGGATG	s	T	1	Hs.458607	BC040648:Hs.458607:Hs184: Likely ortholog of mouse neighbor of Punc E11	8	1	11	11	0.890746	0.859563
GATCTGTTTGTAGCAGT	s	T	1	Hs.532609	BM972493:Hs.532609:Hs184: KIAA1344	8	5	11	0	0.890746	0.859563
GATCCTGTATTAAGCTG	s	T	1	Hs.481720	AL832428:Hs.481720:Hs184: Myosin X	10	4	11	3	0.890746	0.871292
GATCCATCCACAGAAAA	s	T	1	Hs.153961	AI492072:Hs.153961:Hs184: ARP1 actin-related protein 1 homolog A, centractin alpha (yeast)	12	5	0	0	0.0586249	0.399179
GATCTACTGTAAAAAGA	s	T	1	Hs.31121	BM693371:Hs.31121:Hs184: Syntrophin, alpha 1 (dystrophin-associated protein A1, 59kDa, acidic component)	12	2	0	0	0.0586249	0.399179
GATCGTGAGCGGAAACC	s	T	1	Hs.433307	CD364389:Hs.433307:Hs184: Branched chain keto acid dehydrogenase E1, alpha polypeptide (maple syrup urine disease)	12	1	0	0	0.0586249	0.399179
GATCTGTGGAGGTCAAC	s	T	1	Hs.333120	BC007973:Hs.333120:Hs184: Apoptosis-related protein PNAS-1	12	2	0	0	0.0586249	0.399179
GATCGCAAGCTGGATGA	s	T	1	Hs.27160	BC011880:Hs.27160:Hs184: Hypothetical protein BC011880	12	12	0	0	0.0586249	0.399179
GATCGTCAGATTCAGAT	s	T	1	Hs.435991	AI942438:Hs.435991:Hs184: Chromosome 4 open reading frame 16	12	5	0	0	0.0586249	0.399179
GATCCTTAGATTTTGGG	s	T	1	Hs.101014	AA603471:Hs.101014:Hs184: Translokin	12	5	0	0	0.0586249	0.399179
GATCTTCAAAAAGTTGC	s	T	1	Hs.311346	BC016609:Hs.311346:Hs184: Cytidine monophosphate N-acetylneuraminic acid synthetase	12	11	0	0	0.0586249	0.399179
GATCTGGGGCCGCCCTT	s	T	1	Hs.528006	NM_020126:Hs.528006:Hs184: Sphingosine kinase 2	12	12	0	0	0.0586249	0.399179
GATCAACATAATGGACC	s	T	1	Hs.484813	NM_003472:Hs.484813:Hs184: DEK oncogene (DNA binding)	12	2	0	0	0.0586249	0.399179
GATCTTTACCGTGGCCT	s	T	1	Hs.179608	NM_005771:Hs.179608:Hs184: Dehydrogenase/reductase (SDR family) member 9	12	1	0	0	0.0586249	0.399179
GATCCTATCCAAAGCTG	s	T	1	Hs.536535	BC031643:Hs.536535:Hs184: Dual specificity phosphatase 16	12	2	0	0	0.0586249	0.399179
GATCTTCTGTTCATTTG	s	T	1	Hs.409210	AA282528:Hs.409210:Hs184: Zinc finger DAZ interacting protein 3	12	1	0	0	0.0586249	0.399179
GATCAGTCTCCACAGCT	s	T	1	Hs.535044	CA433484:Hs.535044:Hs184: FLJ00290 protein	12	1	0	0	0.0586249	0.399179
GATCATGTAATATCTGT	s	T	1	Hs.32973	NM_000824:Hs.32973:Hs184: Glycine receptor, beta	12	1	0	0	0.0586249	0.399179
GATCTTCTGGACAGACA	s	T	1	Hs.387995	BC019709:Hs.387995:Hs184: Glycosyltransferase 25 domain containing 2	12	11	0	0	0.0586249	0.399179
GATCATTGGAAGCAATC	s	T	1	Hs.498028	NM_014236:Hs.498028:Hs184: Glyceronephosphate O-acyltransferase	12	5	0	0	0.0586249	0.399179
GATCTTTTGTGGTCCTG	s	T	1	Hs.213389	AA706391:Hs.213389:Hs184: Golgi autoantigen, golgin subfamily b, macrogolgin (with transmembrane signal), 1	12	12	0	0	0.0586249	0.399179
GATCATACCCAGGCCAC	s	T	1	Hs.162852	CX866002:Hs.162852:Hs184: Hook homolog 3 (Drosophila)	12	1	0	0	0.0586249	0.399179
GATCCTGTCCTTTGATA	s	T	1	Hs.460960	BQ000521:Hs.460960:Hs184: MRNA; cDNA DKFZp564C063 (from clone DKFZp564C063)	12	12	0	0	0.0586249	0.399179
GATCTGCTATTGGGTTG	s	T	1	Hs.514505	AA775442:Hs.514505:Hs184: Phosphatidylserine receptor	12	5	0	0	0.0586249	0.399179
GATCATGAATGTCAAAG	s	T	1	Hs.355750	BG058582:Hs.355750:Hs184: Hypothetical protein MGC5306	12	1	0	0	0.0586249	0.399179
GATCATGCTGGGTATGA	s	T	1	Hs.21945	NM_181714:Hs.21945:Hs184: Chromosome 6 open reading frame 152	12	5	0	0	0.0586249	0.399179
GATCCCATTCCCTTCTT	s	T	1	Hs.87194	AI018820:Hs.87194:Hs184: Hypothetical protein LOC283658	12	5	0	0	0.0586249	0.399179
GATCCACTGCCATTCTA	s	T	1	Hs.487562	BU634179:Hs.487562:Hs184: Similar to hypothetical protein MGC27019	12	5	0	0	0.0586249	0.399179
GATCTGCCTGGGCATCA	s	T	1	Hs.365286	AI346275:Hs.365286:Hs184: Family with sequence similarity 21, member C	12	2	0	0	0.0586249	0.399179
GATCCAGCTGGCTCCTC	s	T	1	Hs.535325	AW295800:Hs.535325:Hs184: Full-length cDNA clone CS0DI078YL03 of Placenta Cot 25-normalized of Homo sapiens (human)	12	2	0	0	0.0586249	0.399179
GATCATGCTATCCCCAG	s	T	1	Hs.134859	AI769992:Hs.134859:Hs184: V-maf musculoaponeurotic fibrosarcoma oncogene homolog (avian)	12	11	0	0	0.0586249	0.399179
GATCTGCAAGTAGCCTA	s	T	1	Hs.190043	AL834345:Hs.190043:Hs184: Motile sperm domain containing 2	12	5	0	0	0.0586249	0.399179
GATCCGCAGTTATGAAG	s	T	1	Hs.352839	BC031336:Hs.352839:Hs184: Mitochondrial ribosomal protein S15	12	1	0	0	0.0586249	0.399179
GATCCGCGAGTCGGAGG	s	T	1	Hs.382044	BF512122:Hs.382044:Hs184: Mitochondrial ribosomal protein S2	12	12	0	0	0.0586249	0.399179
GATCCTGCGATAGGGAA	s	T	1	Hs.442619	BC006313:Hs.442619:Hs184: Musculin (activated B-cell factor-1)	12	2	0	0	0.0586249	0.399179
GATCATTGAAATTCTGA	s	T	1	Hs.81328	BC002601:Hs.81328:Hs184: Nuclear factor of kappa light polypeptide gene enhancer in B-cells inhibitor, alpha	12	5	0	0	0.0586249	0.399179
GATCGTCGGCGGACCTA	s	T	1	Hs.131489	BC011711:Hs.131489:Hs184: Par-3 partitioning defective 3 homolog (C. elegans)	12	5	0	0	0.0586249	0.399179
GATCATATGGCTGATGT	s	T	1	Hs.144502	AI167420:Hs.144502:Hs184: Phosphatidylinositol-4-phosphate 5-kinase, type II, gamma	12	2	0	0	0.0586249	0.399179
GATCTCACCAAGCGCTT	s	T	1	Hs.194350	NM_002730:Hs.194350:Hs184: Protein kinase, cAMP-dependent, catalytic, alpha	12	11	0	0	0.0586249	0.399179
GATCTCCTATGAGAACA	s	T	1	Hs.470477	BC018662:Hs.470477:Hs184: Protein tyrosine phosphatase type IVA, member 2	12	2	0	0	0.0586249	0.399179
GATCTACGTGAGACATT	s	T	1	Hs.79092	BC039897:Hs.79092:Hs184: Protein tyrosine phosphatase, non-receptor type 5 (striatum-enriched)	12	1	0	0	0.0586249	0.399179
GATCATCAGACTCCACC	s	T	1	Hs.459795	AA740842:Hs.459795:Hs184: Leucine zipper domain protein	12	11	0	0	0.0586249	0.399179
GATCCTACCAGTTGCCT	s	T	1	Hs.515500	AW409756:Hs.515500:Hs184: SUMO-1 activating enzyme subunit 1	12	1	0	0	0.0586249	0.399179
GATCCACTAATGTAGCT	s	T	1	Hs.480815	BC016511:Hs.480815:Hs184: Short coiled-coil protein	12	2	0	0	0.0586249	0.399179
GATCCCAAGGAAAGATG	s	T	1	Hs.467960	BM725422:Hs.467960:Hs184: RAB10, member RAS oncogene family	12	1	0	0	0.0586249	0.399179
GATCCAGGCTATCTCTT	s	T	1	Hs.503178	BM985323:Hs.503178:Hs184: Spectrin, beta, non-erythrocytic 1	12	5	0	0	0.0586249	0.399179
GATCTTTTTTACCCTGA	s	T	1	Hs.520383	BG283868:Hs.520383:Hs184: Syntaxin 7	12	11	0	0	0.0586249	0.399179
GATCATTTTGGCAGTAA	s	T	1	Hs.12967	BC031033:Hs.12967:Hs184: Spectrin repeat containing, nuclear envelope 1	12	5	0	0	0.0586249	0.399179
GATCCATGAAGTAGGTT	s	T	1	Hs.50216	BC047243:Hs.50216:Hs184: Zinc finger protein 588	12	8	0	0	0.0586249	0.399179
GATCATGGCAGATAGCC	s	T	1	Hs.543085	AW205616:Hs.543085:Hs184: Kruppel-like zinc finger factor X17	12	11	0	0	0.0586249	0.399179
GATCAACTGGCTTTTCT	s	T	1	Hs.459142	AI564739:Hs.459142:Hs184: MRNA; cDNA DKFZp686A11113 (from clone DKFZp686A11113)	12	9	0	0	0.0586249	0.399179
GATCCTCACTTAGGGCA	s	T	1	Hs.65857	AI631033:Hs.65857:Hs184: Transcribed locus	12	11	0	0	0.0586249	0.399179
GATCTGTTACCGTCTCC	s	T	1	Hs.550529	AL832796:Hs.550529:Hs184: Caspase recruitment domain family, member 14	12	11	0	0	0.0586249	0.399179
GATCCTTGTGGCACTCA	s	T	1	Hs.136338	AW021469:Hs.136338:Hs184: Interleukin 17 receptor B	12	5	0	0	0.0586249	0.399179
GATCTGTGAAATAAAGA	s	T	1	Hs.464734	AW291924:Hs.464734:Hs184: Small nuclear ribonucleoprotein D1 polypeptide 16kDa	12	2	0	0	0.0586249	0.399179
GATCAAGAAAAGGTTGT	s	T	1	Hs.7572	BC012000:Hs.7572:Hs184: CDNA FLJ30340 fis, clone BRACE2007411	12	1	0	0	0.0586249	0.399179
GATCTGCAAAATTTACA	s	T	1	Hs.24321	BC036599:Hs.24321:Hs184: CDNA clone IMAGE:5273964, partial cds	12	2	0	0	0.0586249	0.399179
GATCAATTTCTTGTAAA	s	T	1	Hs.375744	BC043173:Hs.375744:Hs184: CDNA clone IMAGE:5287121, partial cds	12	1	0	0	0.0586249	0.399179
GATCTCCTATGTTACCA	s	T	1	Hs.298990	BC066596:Hs.298990:Hs184: SWI/SNF related, matrix associated, actin dependent regulator of chromatin, subfamily a, member 2	12	1	0	0	0.0586249	0.399179
GATCCAGTTTAATAACT	s	T	1	Hs.518129	BM683085:Hs.518129:Hs184: Transcribed locus, weakly similar to XP_375099.1 PREDICTED: similar to hypothetical protein FLJ25224 [Homo sapiens]	12	2	0	0	0.0586249	0.399179
GATCCTAGTAGTCTGAA	s	T	1	Hs.14945	BM683266:Hs.14945:Hs184: Acyl-CoA synthetase long-chain family member 6	12	2	0	0	0.0586249	0.399179
GATCCTGCCCCAAGGAG	s	T	1	Hs.318775	BU674714:Hs.318775:Hs184: Oxysterol binding protein-like 6	12	5	0	0	0.0586249	0.399179
GATCAATTATTTGGCAC	s	T	1	Hs.280342	BU685653:Hs.280342:Hs184: Protein kinase, cAMP-dependent, regulatory, type I, alpha (tissue specific extinguisher 1)	12	5	0	0	0.0586249	0.399179
GATCCTGCAAGAAAAAG	s	T	1	Hs.445019	AI005416:Hs.445019:Hs184: Zinc finger protein 84 (HPF2)	12	2	2	2	0.223086	0.642973
GATCATCAAGTGTGCAT	s	T	1	Hs.524630	AW138777:Hs.524630:Hs184: Ubiquitin-conjugating enzyme E2N (UBC13 homolog, yeast)	12	1	2	2	0.223086	0.642973
GATCCTCGCTGCTGCTG	s	T	1	Hs.474150	NM_197966:Hs.474150:Hs184: BH3 interacting domain death agonist	12	2	4	4	0.223086	0.753392
GATCCCCGCAGCCCCTT	s	T	1	Hs.498997	NM_001014987:Hs.498997:Hs184: Linker for activation of T cells	12	1	4	4	0.223086	0.753392
GATCCTCCAGATGGCAT	s	T	1	Hs.239388	AJ420470:Hs.239388:Hs184: Chromosome 6 open reading frame 33	12	5	4	0	0.223086	0.753392
GATCCAATGCAAGCCAG	s	T	1	Hs.148716	BC012092:Hs.148716:Hs184: ST3 beta-galactoside alpha-2,3-sialyltransferase 6	12	1	4	4	0.223086	0.753392
GATCATGCTTTTCCCTA	s	T	1	Hs.445414	AI277016:Hs.445414:Hs184: CDNA FLJ41270 fis, clone BRAMY2036387	12	8	6	5	0.496236	0.753392
GATCAGAGGTCTTGAGG	s	T	1	Hs.517815	BC017082:Hs.517815:Hs184: Coiled-coil-helix-coiled-coil-helix domain containing 4	12	2	7	7	0.496236	0.827468
GATCCTTCCACTCTTGT	s	T	1	Hs.546316	BC007005:Hs.546316:Hs184: Phosphatidylinositol-4-phosphate 5-kinase, type I, alpha	12	5	7	4	0.496236	0.827468
GATCCAGAGCTGGAGAA	s	T	1	Hs.166186	NM_003741:Hs.166186:Hs184: Chordin	12	11	9	10	0.817941	0.858487
GATCTTCTCCAGATTGG	s	T	1	Hs.549154	BC002437:Hs.549154:Hs184: Exosome component 3	12	2	9	5	0.817941	0.858487
GATCTTAAGATGGCCGA	s	T	1	Hs.477009	BC029660:Hs.477009:Hs184: Ubiquitin specific protease 24	12	11	9	10	0.817941	0.858487
GATCCACCCATCCCAAC	s	T	1	Hs.120844	NM_018416:Hs.120844:Hs184: Forkhead box J2	12	12	11	0	0.817941	0.858487
GATCATGATTTTGTAGT	s	T	1	Hs.156171	NM_002806:Hs.156171:Hs184: Proteasome (prosome, macropain) 26S subunit, ATPase, 6	12	11	11	11	0.817941	0.858487
GATCCGCGAGAAAGACG	s	T	1	Hs.511897	NM_052838:Hs.511897:Hs184: Septin 1	12	5	11	11	0.817941	0.858487
GATCCTCCCAGTTCCCT	s	T	1	Hs.379922	AA594569:Hs.379922:Hs184: Transcribed locus, weakly similar to NP_061913.2 elongation protein 4 homolog; PAX6 neighbor gene; chromosome 11 open reading frame 19 [Homo sapiens]	12	1	11	11	0.817941	0.858487
GATCCCTATTATGGGAA	s	T	1	Hs.130873	NM_004300:Hs.130873:Hs184: Acid phosphatase 1, soluble	13	1	0	0	0.0586249	0.399179
GATCCAATGGATTTGAA	s	T	1	Hs.437341	NM_032725:Hs.437341:Hs184: Hypothetical protein MGC13125	13	1	0	0	0.0586249	0.399179
GATCCTGTCTTCTTTCA	s	T	1	Hs.469398	NM_207362:Hs.469398:Hs184: Similar to 2010300C02Rik protein	13	6	0	0	0.0586249	0.399179
GATCCCCATTTTGCAAG	s	T	1	Hs.433381	AJ420511:Hs.433381:Hs184: Chromosome 6 open reading frame 89	0	0	13	13	0.034404	0.404659
GATCTGTCCTCTAACTT	s	T	1	Hs.224137	NM_016390:Hs.224137:Hs184: Chromosome 9 open reading frame 114	0	0	13	13	0.034404	0.404659
GATCTGTGCTGTCTTAT	s	T	1	Hs.7911	BQ018546:Hs.7911:Hs184: KIAA0323	13	4	0	0	0.0586249	0.399179
GATCCAAGTGGCACCTC	s	T	1	Hs.421509	NM_006430:Hs.421509:Hs184: Chaperonin containing TCP1, subunit 4 (delta)	0	0	13	2	0.034404	0.404659
GATCCTCCGACAGCGAT	s	T	1	Hs.201253	BC035554:Hs.201253:Hs184: KIAA0097 gene product	13	3	0	0	0.0586249	0.399179
GATCCTGCACAGGCCCC	s	T	1	Hs.246413	BQ773276:Hs.246413:Hs184: RNA binding motif protein 12	13	7	0	0	0.0586249	0.399179
GATCACAGGCCTTGCTT	s	T	1	Hs.463759	AB021262:Hs.463759:Hs184: Catenin, beta interacting protein 1	13	13	0	0	0.0586249	0.399179
GATCCAGGTAGGGTCGG	s	T	1	Hs.459379	BC004544:Hs.459379:Hs184: Cysteine and histidine rich 1	13	3	0	0	0.0586249	0.399179
GATCCTATGTGGAAGGG	s	T	1	Hs.48950	AA971965:Hs.48950:Hs184: Dapper homolog 1, antagonist of beta-catenin (xenopus)	13	1	0	0	0.0586249	0.399179
GATCCATGTATCCCCCC	s	T	1	Hs.339453	AL834128:Hs.339453:Hs184: PTX1 protein	0	0	13	13	0.034404	0.404659
GATCTATTCTTCCACAC	s	T	1	Hs.185577	BG181254:Hs.185577:Hs184: Fibroblast growth factor 12	13	3	0	0	0.0586249	0.399179
GATCTTTTGCCCTGGAG	s	T	1	Hs.550507	BM679911:Hs.550507:Hs184: Fibronectin leucine rich transmembrane protein 1	0	0	13	13	0.034404	0.404659
GATCTAAAGTGCAGCAG	s	T	1	Hs.17680	BC003060:Hs.17680:Hs184: Fucosidase, alpha-L- 2, plasma	13	1	0	0	0.0586249	0.399179
GATCATAAACCGTTGCG	s	T	1	Hs.211571	BC001691:Hs.211571:Hs184: Holocytochrome c synthase (cytochrome c heme-lyase)	0	0	13	2	0.034404	0.404659
GATCCTGAGGGCTGTGG	s	T	1	Hs.25934	BC033456:Hs.25934:Hs184: Spermatid-specific linker histone H1-like protein	0	0	13	2	0.034404	0.404659
GATCTGGAATGCATACC	s	T	1	Hs.410316	BC034222:Hs.410316:Hs184: H-rev107-like protein 5	13	1	0	0	0.0586249	0.399179
GATCAGCAGCCGAGAAA	s	T	1	Hs.412196	BC009690:Hs.412196:Hs184: Estrogen-related receptor beta like 1	13	13	0	0	0.0586249	0.399179
GATCCTTCCCCTGGGGT	s	T	1	Hs.517970	AW296155:Hs.517970:Hs184: Inositol hexaphosphate kinase 1	13	1	0	0	0.0586249	0.399179
GATCTGGCCTCAGCTTG	s	T	1	Hs.262886	BC062985:Hs.262886:Hs184: Inositol polyphosphate-5-phosphatase, 145kDa	13	14	0	0	0.0586249	0.399179
GATCTGAGGAGTGGGGA	s	T	1	Hs.113940	BX649000:Hs.113940:Hs184: KIAA1505 protein	13	1	0	0	0.0586249	0.399179
GATCTTTCCTGTCCTGA	s	T	1	Hs.279766	AA679595:Hs.279766:Hs184: Kinesin family member 4A	0	0	13	13	0.034404	0.404659
GATCCGGGAGAGCCCCC	s	T	1	Hs.107922	NM_016490:Hs.107922:Hs184: Hypothetical protein LOC51252	13	4	0	0	0.0586249	0.399179
GATCACCTTCCCTATCC	s	T	1	Hs.94229	NM_001008701:Hs.94229:Hs184: Latrophilin 1	13	13	0	0	0.0586249	0.399179
GATCGACTAAAACTGGC	s	T	1	Hs.413901	BC000833:Hs.413901:Hs184: Mitogen-activated protein kinase-activated protein kinase 5	0	0	13	13	0.034404	0.404659
GATCTTTGCTACTGAAT	s	T	1	Hs.35947	BC011752:Hs.35947:Hs184: Methyl-CpG binding domain protein 4	13	3	0	0	0.0586249	0.399179
GATCCAGCGAGCGACAT	s	T	1	Hs.247324	BC009788:Hs.247324:Hs184: Mitochondrial ribosomal protein S14	13	14	0	0	0.0586249	0.399179
GATCTACCAGTTCTCTT	s	T	1	Hs.374950	BC053882:Hs.374950:Hs184: Metallothionein 1X	0	0	13	2	0.034404	0.404659
GATCGTCTTGTATGGTG	s	T	1	Hs.484885	AA258396:Hs.484885:Hs184: CDNA clone IMAGE:4514712, partial cds	0	0	13	13	0.034404	0.404659
GATCCATCTCCTGCCTG	s	T	1	Hs.431043	NM_004571:Hs.431043:Hs184: PBX/knotted 1 homeobox 1	13	1	0	0	0.0586249	0.399179
GATCCTAGTTCCTTCCT	s	T	1	Hs.152978	NM_005789:Hs.152978:Hs184: Proteasome (prosome, macropain) activator subunit 3 (PA28 gamma; Ki)	0	0	13	2	0.034404	0.404659
GATCTGTTCTGCACTGA	s	T	1	Hs.323489	AW137204:Hs.323489:Hs184: FLJ20758 protein	13	1	0	0	0.0586249	0.399179
GATCGGTAGTGTTGTGT	s	T	1	Hs.513057	BC000947:Hs.513057:Hs184: RAN binding protein 5	13	6	0	0	0.0586249	0.399179
GATCGTTTTCTCCATCA	s	T	1	Hs.8035	NM_023940:Hs.8035:Hs184: RAS-like, family 11, member B	13	1	0	0	0.0586249	0.399179
GATCCCACTGTTAGCAA	s	T	1	Hs.27018	NM_016563:Hs.27018:Hs184: RAS-like, family 12	13	7	0	0	0.0586249	0.399179
GATCCCACAGCCTCAAA	s	T	1	Hs.502829	BM682275:Hs.502829:Hs184: Splicing factor 1	0	0	13	13	0.034404	0.404659
GATCATGCAGCTAATGA	s	T	1	Hs.524341	BC039431:Hs.524341:Hs184: Solute carrier family 2 (facilitated glucose transporter), member 13	13	3	0	0	0.0586249	0.399179
GATCAGCCATGTGGGCA	s	T	1	Hs.494556	AI871808:Hs.494556:Hs184: Solute carrier family 35, member D2	13	1	0	0	0.0586249	0.399179
GATCATGCTCACAGAGG	s	T	1	Hs.504398	NM_016615:Hs.504398:Hs184: Solute carrier family 6 (neurotransmitter transporter, GABA), member 13	13	3	0	0	0.0586249	0.399179
GATCTTCCCCCTTCCCG	s	T	1	Hs.2420	BC014418:Hs.2420:Hs184: Superoxide dismutase 3, extracellular	0	0	13	2	0.034404	0.404659
GATCTGGAAAAACAGAT	s	T	1	Hs.20013	AI654287:Hs.20013:Hs184: GCIP-interacting protein p29	13	1	0	0	0.0586249	0.399179
GATCTGCCCTGGGTGTA	s	T	1	Hs.527688	BU625123:Hs.527688:Hs184: TAF3 RNA polymerase II, TATA box binding protein (TBP)-associated factor, 140kDa	13	13	0	0	0.0586249	0.399179
GATCATCCCTTCACAAT	s	T	1	Hs.516297	NM_031283:Hs.516297:Hs184: Transcription factor 7-like 1 (T-cell specific, HMG-box)	0	0	13	13	0.034404	0.404659
GATCTCCGCACAGGGGA	s	T	1	Hs.23119	BM972908:Hs.23119:Hs184: Chromosome X open reading frame 12	13	7	0	0	0.0586249	0.399179
GATCTGTAATCATCTCT	s	T	1	Hs.517817	NM_024334:Hs.517817:Hs184: Transmembrane protein 43	13	1	0	0	0.0586249	0.399179
GATCAGTTGATGTACAC	s	T	1	Hs.475688	NM_152653:Hs.475688:Hs184: Ubiquitin-conjugating enzyme E2E 2 (UBC4/5 homolog, yeast)	13	14	0	0	0.0586249	0.399179
GATCCCCACAGCTCTCG	s	T	1	Hs.502989	NM_030930:Hs.502989:Hs184: Unc-93 homolog B1 (C. elegans)	0	0	13	13	0.034404	0.404659
GATCTTTTGTCCTCTTC	s	T	1	Hs.458499	BX647760:Hs.458499:Hs184: Ubiquitin specific protease 3	0	0	13	13	0.034404	0.404659
GATCCACATTTTGCTCA	s	T	1	Hs.191540	BQ010978:Hs.191540:Hs184: Vacuolar protein sorting 13B (yeast)	0	0	13	13	0.034404	0.404659
GATCCTCAGTGCAGCTC	s	T	1	Hs.333179	BC053873:Hs.333179:Hs184: BH3-only member B protein	13	3	0	0	0.0586249	0.399179
GATCTGAGGTCTCAAGC	s	T	1	Hs.482660	AA864794:Hs.482660:Hs184: Zinc finger, FYVE domain containing 16	13	14	0	0	0.0586249	0.399179
GATCTGTCATGTTTTAG	s	T	1	Hs.79881	AK026659:Hs.79881:Hs184: CDNA: FLJ23006 fis, clone LNG00414	13	1	0	0	0.0586249	0.399179
GATCTCTCGTGATTGAT	s	T	1	Hs.32763	AL832605:Hs.32763:Hs184: Glutamate receptor, ionotropic, AMPA 2	13	1	0	0	0.0586249	0.399179
GATCATTTTGCACATAG	s	T	1	Hs.408767	BM704427:Hs.408767:Hs184: Crystallin, alpha B	13	1	0	0	0.0586249	0.399179
GATCTGCATCCCACCTC	s	T	1	Hs.520348	BM990019:Hs.520348:Hs184: Ubiquitin C	13	13	0	0	0.0586249	0.399179
GATCCAGCGTGTGGGAG	s	T	1	Hs.12907	BX092510:Hs.12907:Hs184: Cytochrome P450, family 2, subfamily E, polypeptide 1	13	1	0	0	0.0586249	0.399179
GATCCAGGAGCAGACTG	s	T	1	Hs.124623	AA856767:Hs.124623:Hs184: Transcribed locus	0	0	13	2	0.034404	0.404659
GATCCCACCACAGCAAC	s	T	1	Hs.549706	AI128796:Hs.549706:Hs184: Hypothetical protein MGC16037	0	0	13	10	0.034404	0.404659
GATCCTAAAGTCCAGCC	s	T	1	Hs.132305	AL832916:Hs.132305:Hs184: MRNA; cDNA DKFZp762I0915 (from clone DKFZp762I0915)	0	0	13	2	0.034404	0.404659
GATCCTACCGGAAACCA	s	T	1	Hs.500104	BM674632:Hs.500104:Hs184: Adaptor-related protein complex 3, mu 1 subunit	2	2	13	6	0.141793	0.651863
GATCAGGCATATTTGTG	s	T	1	Hs.292316	AK025738:Hs.292316:Hs184: ASF1 anti-silencing function 1 homolog A (S. cerevisiae)	13	1	2	2	0.223086	0.642973
GATCCAGAGACAAGACT	s	T	1	Hs.490273	AL080209:Hs.490273:Hs184: CAMP responsive element binding protein 3-like 2	2	2	13	2	0.141793	0.651863
GATCCTAAATGTGTTGC	s	T	1	Hs.449415	BM676883:Hs.449415:Hs184: Eukaryotic translation initiation factor 2C, 2	13	9	2	2	0.223086	0.642973
GATCATTTGGCTCTTTT	s	T	1	Hs.149261	NM_001001890:Hs.149261:Hs184: Runt-related transcription factor 1 (acute myeloid leukemia 1; aml1 oncogene)	2	2	13	13	0.141793	0.651863
GATCCTCGCACCTGGAG	s	T	1	Hs.513100	AW197213:Hs.513100:Hs184: Zinc finger and SCAN domain containing 2	2	2	13	2	0.141793	0.651863
GATCAGTTGTACTAGAG	s	T	1	Hs.102914	BX537641:Hs.102914:Hs184: Cullin 4B	13	1	2	2	0.223086	0.642973
GATCTGCAGTTGGTTGA	s	T	1	Hs.549673	AI452937:Hs.549673:Hs184: AF034176 Human mRNA (Tripodis and Ragoussis) Homo sapiens cDNA clone ntcon5 contig	2	2	13	2	0.141793	0.651863
GATCCTCCCTCTCAGAA	s	T	1	Hs.247362	BM994962:Hs.247362:Hs184: Dimethylarginine dimethylaminohydrolase 2	3	3	13	5	0.141793	0.651863
GATCCTGGGTCTTGGGA	s	T	1	Hs.549212	BM983066:Hs.549212:Hs184: Hypothetical protein MGC13045	3	0	13	5	0.141793	0.651863
GATCCTCGGAATCCAGT	s	T	1	Hs.371372	BC012117:Hs.371372:Hs184: Serologically defined colon cancer antigen 10	3	3	13	5	0.141793	0.651863
GATCCGGTTGGACTCTG	s	T	1	Hs.23348	NM_032637:Hs.23348:Hs184: S-phase kinase-associated protein 2 (p45)	3	0	13	6	0.141793	0.651863
GATCCAAGAAGCGGGTC	s	T	1	Hs.474822	NM_025045:Hs.474822:Hs184: BAI1-associated protein 2-like 2	13	4	4	4	0.223086	0.753392
GATCACCACTTCCCCAA	s	T	1	Hs.8022	AW205038:Hs.8022:Hs184: TU3A protein	13	14	4	4	0.223086	0.753392
GATCAGGCCTTGGCCTC	s	T	1	Hs.432642	BI916114:Hs.432642:Hs184: Mitogen-activated protein kinase 12	13	13	4	4	0.223086	0.753392
GATCATCTGTCTCTGTT	s	T	1	Hs.25791	BC030642:Hs.25791:Hs184: PARK2 co-regulated	13	7	4	0	0.223086	0.753392
GATCTACTTCCCATGCA	s	T	1	Hs.497575	BC063527:Hs.497575:Hs184: SLIT-ROBO Rho GTPase activating protein 2	13	1	4	4	0.223086	0.753392
GATCCAGGTGGTGGTGG	s	T	1	Hs.553719	BX648562:Hs.553719:Hs184: Similar to RIKEN cDNA 1810038N08 gene	5	5	13	13	0.339505	0.772929
GATCAGTTTTTCCATCC	s	T	1	Hs.490899	BU682979:Hs.490899:Hs184: 1-acylglycerol-3-phosphate O-acyltransferase 5 (lysophosphatidic acid acyltransferase, epsilon)	13	4	6	6	0.496236	0.753392
GATCTTCAACCAGTCCA	s	T	1	Hs.343571	AF180474:Hs.343571:Hs184: CCR4-NOT transcription complex, subunit 3	13	3	6	5	0.496236	0.753392
GATCCCAGGAGACACCA	s	T	1	Hs.520446	NM_032951:Hs.520446:Hs184: Williams Beuren syndrome chromosome region 14	13	13	6	5	0.496236	0.753392
GATCATGACCAACACGG	s	T	1	Hs.471610	BC004514:Hs.471610:Hs184: Melanoma/melanocyte specific protein KU-MEL-1	13	3	7	4	0.496236	0.827468
GATCATCTGGCCACCCC	s	T	1	Hs.523687	BC000446:Hs.523687:Hs184: ATP/GTP-binding protein	13	13	7	8	0.496236	0.827468
GATCCTCTTCAACCCTG	s	T	1	Hs.486010	NM_032511:Hs.486010:Hs184: Chromosome 6 open reading frame 168	8	1	13	13	0.598244	0.837221
GATCCGCACTAACTCAT	s	T	1	Hs.437385	NM_018090:Hs.437385:Hs184: Adaptin-ear-binding coat-associated protein 2	8	2	13	2	0.598244	0.837221
GATCTTCCATCTCCTCA	s	T	1	Hs.175120	BC010847:Hs.175120:Hs184: Hypothetical protein FLJ11286	8	2	13	2	0.598244	0.837221
GATCACCTTCTGATGGT	s	T	1	Hs.511797	BX537997:Hs.511797:Hs184: Non imprinted in Prader-Willi/Angelman syndrome 1	8	2	13	9	0.598244	0.837221
GATCTAACCACGCCTGG	s	T	1	Hs.522384	AK025059:Hs.522384:Hs184: F-box protein 42	13	1	9	10	0.817941	0.858487
GATCCAGCCCCTCAGGG	s	T	1	Hs.442634	BC002330:Hs.442634:Hs184: Hypothetical protein MGC4692	10	0	13	13	0.598244	0.860314
GATCTGCGGGACAGAGC	s	T	1	Hs.525307	NM_175060:Hs.525307:Hs184: C-type lectin domain family 14, member A	12	2	13	6	0.873976	0.86926
GATCCAAATCCCATTAC	s	T	1	Hs.197086	NM_001003681:Hs.197086:Hs184: High-mobility group protein 2-like 1	12	5	13	2	0.873976	0.86926
GATCGTTAATAACTCCT	s	T	1	Hs.283734	NM_020409:Hs.283734:Hs184: Mitochondrial ribosomal protein L47	12	12	13	13	0.873976	0.86926
GATCCTGAAACTGTCTC	s	T	1	Hs.303055	NM_144596:Hs.303055:Hs184: Tetratricopeptide repeat domain 8	12	2	13	2	0.873976	0.86926
GATCTTTGGATTGACTG	s	T	1	Hs.433701	BC039030:Hs.433701:Hs184: Ribosomal protein L37a	13	3	13	13	0.873976	0.86926
GATCTTCGTGGGGCCCC	s	T	1	Hs.529161	BC035719:Hs.529161:Hs184: Alpha-1-B glycoprotein	0	0	15	4	0.034404	0.383968
GATCAGCTGGGGAGGAA	s	T	1	Hs.103561	BQ772618:Hs.103561:Hs184: ADP-ribosylation-like factor 6 interacting protein 4	0	0	15	15	0.034404	0.383968
GATCCACAGGGGCTATC	s	T	1	Hs.386140	NM_001003940:Hs.386140:Hs184: Bcl2 modifying factor	0	0	15	7	0.034404	0.383968
GATCTGACCTGTGAAAA	s	T	1	Hs.149454	BM313825:Hs.149454:Hs184: Chromosome 6 open reading frame 159	15	2	0	0	0.0344982	0.372717
GATCTTTTTCCATCCAG	s	T	1	Hs.493639	NM_145005:Hs.493639:Hs184: Chromosome 9 open reading frame 72	0	0	15	15	0.034404	0.383968
GATCCGCGAGGAAGCGC	s	T	1	Hs.14745	AI168162:Hs.14745:Hs184: Chromosome 10 open reading frame 9	15	9	0	0	0.0344982	0.372717
GATCTAGAAACTGAGTT	s	T	1	Hs.445827	NM_000393:Hs.445827:Hs184: Collagen, type V, alpha 2	15	1	0	0	0.0344982	0.372717
GATCCTCATTCTCACCC	s	T	1	Hs.149252	NM_001875:Hs.149252:Hs184: Carbamoyl-phosphate synthetase 1, mitochondrial	15	2	0	0	0.0344982	0.372717
GATCTGGTGACTGTTCT	s	T	1	Hs.355264	NM_001915:Hs.355264:Hs184: Cytochrome b-561	15	4	0	0	0.0344982	0.372717
GATCCATGTACAATTCA	s	T	1	Hs.443875	AK025019:Hs.443875:Hs184: DCP2 decapping enzyme homolog (S. cerevisiae)	15	9	0	0	0.0344982	0.372717
GATCTTCTTCTGGCCCT	s	T	1	Hs.131603	BC040052:Hs.131603:Hs184: EMI domain containing 2	15	16	0	0	0.0344982	0.372717
GATCCGGTCCTGTTTGA	s	T	1	Hs.434286	BC010227:Hs.434286:Hs184: Checkpoint suppressor 1	15	2	0	0	0.0344982	0.372717
GATCTAGGCACTTAGTT	s	T	1	Hs.49117	AL080093:Hs.49117:Hs184: MRNA; cDNA DKFZp686F1844 (from clone DKFZp686F1844)	15	14	0	0	0.0344982	0.372717
GATCAACAAGCAGACGC	s	T	1	Hs.29978	BC048097:Hs.29978:Hs184: Frataxin	0	0	15	0	0.034404	0.383968
GATCCGCATCCAAGCTT	s	T	1	Hs.441202	NM_001495:Hs.441202:Hs184: GDNF family receptor alpha 2	15	2	0	0	0.0344982	0.372717
GATCCAGCTCAGAACGA	s	T	1	Hs.59138	BC016653:Hs.59138:Hs184: Glycophorin C (Gerbich blood group)	15	1	0	0	0.0344982	0.372717
GATCAACAGGGTGTCGT	s	T	1	Hs.124156	NM_033055:Hs.124156:Hs184: Hippocampus abundant transcript 1	15	12	0	0	0.0344982	0.372717
GATCTGGGGAGGGCTAG	s	T	1	Hs.415299	NM_033453:Hs.415299:Hs184: Inosine triphosphatase (nucleoside triphosphate pyrophosphatase)	15	14	0	0	0.0344982	0.372717
GATCATTTGCAGCAGTT	s	T	1	Hs.6224	BC028678:Hs.6224:Hs184: KIAA0895 protein	15	1	0	0	0.0344982	0.372717
GATCTGACTGCCTCCTC	s	T	1	Hs.285976	BC010032:Hs.285976:Hs184: LAG1 longevity assurance homolog 2 (S. cerevisiae)	0	0	15	15	0.034404	0.383968
GATCTTCCCAGCACCAG	s	T	1	Hs.56782	BC029607:Hs.56782:Hs184: Homo sapiens, clone IMAGE:5300488, mRNA	0	0	15	15	0.034404	0.383968
GATCTGTCATCTTCATA	s	T	1	Hs.480938	NM_006726:Hs.480938:Hs184: LPS-responsive vesicle trafficking, beach and anchor containing	0	0	15	4	0.034404	0.383968
GATCTACATAGATTTGG	s	T	1	Hs.383019	BC010689:Hs.383019:Hs184: MAX-like protein X	15	4	0	0	0.0344982	0.372717
GATCCTGTGTATTTCCC	s	T	1	Hs.368884	CA311182:Hs.368884:Hs184: Chromosome 2 open reading frame 23	15	1	0	0	0.0344982	0.372717
GATCTGGGGTCTGAGTC	s	T	1	Hs.115896	NM_173542:Hs.115896:Hs184: Hypothetical protein LOC196463	15	16	0	0	0.0344982	0.372717
GATCATGGGCTCTGGAA	s	T	1	Hs.446559	AA746919:Hs.446559:Hs184: Full-length cDNA clone CS0DK010YA20 of HeLa cells Cot 25-normalized of Homo sapiens (human)	15	14	0	0	0.0344982	0.372717
GATCCTCACCAACCTAA	s	T	1	Hs.202097	BC000574:Hs.202097:Hs184: Procollagen C-endopeptidase enhancer	15	14	0	0	0.0344982	0.372717
GATCTGGAGACCACCGT	s	T	1	Hs.433863	BU556653:Hs.433863:Hs184: Prostatic binding protein	15	1	0	0	0.0344982	0.372717
GATCCTCGCCAAGCGGT	s	T	1	Hs.339831	NM_006211:Hs.339831:Hs184: Proenkephalin	15	6	0	0	0.0344982	0.372717
GATCGTTCTCTGATGGT	s	T	1	Hs.533339	BC026102:Hs.533339:Hs184: Period homolog 3 (Drosophila)	15	1	0	0	0.0344982	0.372717
GATCATCAGTGCCGCCA	s	T	1	Hs.279413	BC008800:Hs.279413:Hs184: Polymerase (DNA directed), delta 1, catalytic subunit 125kDa	0	0	15	7	0.034404	0.383968
GATCCTCAAAAAAACCC	s	T	1	Hs.304792	AA810972:Hs.304792:Hs184: Proline synthetase co-transcribed homolog (bacterial)	15	6	0	0	0.0344982	0.372717
GATCTGACTTTAATTGT	s	T	1	Hs.490789	AI700577:Hs.490789:Hs184: Protein tyrosine phosphatase, receptor type, N polypeptide 2	15	2	0	0	0.0344982	0.372717
GATCAGTTCTAGTACCT	s	T	1	Hs.125293	NM_145313:Hs.125293:Hs184: RasGEF domain family, member 1A	15	2	0	0	0.0344982	0.372717
GATCCTTAGGTGCTCAA	s	T	1	Hs.522895	NM_032023:Hs.522895:Hs184: Ras association (RalGDS/AF-6) domain family 4	0	0	15	7	0.034404	0.383968
GATCCCAAGGCATTTAC	s	T	1	Hs.521289	NM_013400:Hs.521289:Hs184: Replication initiator 1	15	6	0	0	0.0344982	0.372717
GATCTGTTGGGAAAGAT	s	T	1	Hs.334603	BC012764:Hs.334603:Hs184: RALBP1 associated Eps domain containing 1	15	6	0	0	0.0344982	0.372717
GATCCCAAAGAAAGGGA	s	T	1	Hs.226390	BC001886:Hs.226390:Hs184: Ribonucleotide reductase M2 polypeptide	0	0	15	4	0.034404	0.383968
GATCACTGTAGTTTAGT	s	T	1	Hs.368641	AF109362:Hs.368641:Hs184: Stearoyl-CoA desaturase (delta-9-desaturase)	15	2	0	0	0.0344982	0.372717
GATCTTTTTGGGGGGGG	s	T	1	Hs.420541	BQ016983:Hs.420541:Hs184: KIAA1202 protein	15	6	0	0	0.0344982	0.372717
GATCATTGTTGTCCTTT	s	T	1	Hs.13999	BC005113:Hs.13999:Hs184: SIN3 homolog B, transcription regulator (yeast)	15	1	0	0	0.0344982	0.372717
GATCCTGAAGAATCACC	s	T	1	Hs.478031	BC014416:Hs.478031:Hs184: Solute carrier family 33 (acetyl-CoA transporter), member 1	15	2	0	0	0.0344982	0.372717
GATCTGGGAAACCAACA	s	T	1	Hs.494700	NM_080546:Hs.494700:Hs184: CDW92 antigen	15	4	0	0	0.0344982	0.372717
GATCGGCTTGAGGGTGG	s	T	1	Hs.199695	BU730409:Hs.199695:Hs184: Hypothetical protein MAC30	15	16	0	0	0.0344982	0.372717
GATCGCACAACTGCAGA	s	T	1	Hs.109778	BQ183765:Hs.109778:Hs184: WD repeat domain 48	0	0	15	15	0.034404	0.383968
GATCACCTTCCAGACCA	s	T	1	Hs.502916	BC057833:Hs.502916:Hs184: Zinc finger, DHHC domain containing 24	0	0	15	3	0.034404	0.383968
GATCGTACCACTGTGCT	s	T	1	Hs.423725	AY260738:Hs.423725:Hs184: Zinc finger with KRAB and SCAN domains 1	15	1	0	0	0.0344982	0.372717
GATCTGCCCACTTTGAG	s	T	1	Hs.515372	BC007064:Hs.515372:Hs184: Zinc finger protein 566	0	0	15	4	0.034404	0.383968
GATCCTCAGTGTTCTCT	s	T	1	Hs.223325	AI873703:Hs.223325:Hs184: MRNA sequence	15	1	0	0	0.0344982	0.372717
GATCTTCCTCCATTTAA	s	T	1	Hs.388742	AJ420439:Hs.388742:Hs184: MRNA full length insert cDNA clone EUROIMAGE 1585492	15	1	0	0	0.0344982	0.372717
GATCCACTGAACTGCAC	s	T	1	Hs.253267	BM970693:Hs.253267:Hs184: Transcribed locus	15	4	0	0	0.0344982	0.372717
GATCCACACACTGTGAA	s	T	1	Hs.126135	NM_012076:Hs.126135:Hs184: Crumbs homolog 1 (Drosophila)	15	2	0	0	0.0344982	0.372717
GATCCAATTGAGAAAAC	s	T	1	Hs.547479	AW449427:Hs.547479:Hs184: Transcribed locus, weakly similar to XP_498467.1 PREDICTED: hypothetical protein XP_498467 [Homo sapiens]	0	0	15	3	0.034404	0.383968
GATCATCAAGCTCATCT	s	T	1	Hs.196469	BM977037:Hs.196469:Hs184: LOC441153	0	0	15	3	0.034404	0.383968
GATCCTCAAGCCGAACA	s	T	1	Hs.199029	BC037270:Hs.199029:Hs184: A kinase (PRKA) anchor protein 8	15	1	2	2	0.13408	0.60077
GATCAGGAAAGTGACAC	s	T	1	Hs.180346	NM_138413:Hs.180346:Hs184: Chromosome 10 open reading frame 65	15	1	2	2	0.13408	0.60077
GATCCTGATGTTTCCTA	s	T	1	Hs.12313	NM_032806:Hs.12313:Hs184: Glycosyltransferase	2	2	15	3	0.141793	0.606819
GATCTTCTTCCCCATTT	s	T	1	Hs.127788	NM_032042:Hs.127788:Hs184: Hypothetical protein FLJ12078	15	4	2	2	0.13408	0.60077
GATCATCACAACCAGAT	s	T	1	Hs.227049	NM_019857:Hs.227049:Hs184: CTP synthase II	15	2	2	2	0.13408	0.60077
GATCCTTGAGAACTTGG	s	T	1	Hs.15476	NM_022047:Hs.15476:Hs184: Differentially expressed in FDCP 6 homolog (mouse)	2	2	15	4	0.141793	0.606819
GATCCTGGGTACTGAAA	s	T	1	Hs.446352	BC080193:Hs.446352:Hs184: V-erb-b2 erythroblastic leukemia viral oncogene homolog 2, neuro/glioblastoma derived oncogene homolog (avian)	2	2	15	3	0.141793	0.606819
GATCCTGTCCTGATTCT	s	T	1	Hs.220971	AA852548:Hs.220971:Hs184: FOS-like antigen 2	2	2	15	0	0.141793	0.606819
GATCCCCTGAAGTCGCA	s	T	1	Hs.213690	NM_018034:Hs.213690:Hs184: Hypothetical protein FLJ10233	2	2	15	0	0.141793	0.606819
GATCCAGCTTCAGCTAT	s	T	1	Hs.255973	BQ026213:Hs.255973:Hs184: CREBBP/EP300 inhibitor 1	3	3	15	15	0.141793	0.606819
GATCTAGTTCCAAGTCT	s	T	1	Hs.529509	BU681160:Hs.529509:Hs184: Natural killer-tumor recognition sequence	3	3	15	15	0.141793	0.606819
GATCCAGACATCTCAAG	s	T	1	Hs.521615	CA422540:Hs.521615:Hs184: Hypothetical protein MGC33510	15	4	4	4	0.13408	0.673901
GATCTGTTCCAACTTGG	s	T	1	Hs.11108	NM_138375:Hs.11108:Hs184: Cdk5 and Abl enzyme substrate 1	15	1	4	0	0.13408	0.673901
GATCCTTGATTGGTGAA	s	T	1	Hs.467868	BC029459:Hs.467868:Hs184: FLJ30851 protein	15	14	4	4	0.13408	0.673901
GATCCTGTTAAGATTGT	s	T	1	Hs.550540	BC088800:Hs.550540:Hs184: Hypothetical protein MGC15875	15	1	4	0	0.13408	0.673901
GATCTGCCTCCAGGAGC	s	T	1	Hs.518540	BM977281:Hs.518540:Hs184: Leishmanolysin-like (metallopeptidase M8 family)	15	4	4	4	0.13408	0.673901
GATCCAGCCTCCTACCT	s	T	1	Hs.507681	BM510927:Hs.507681:Hs184: Mitogen-activated protein kinase kinase kinase 7 interacting protein 1	15	6	4	4	0.13408	0.673901
GATCTATACTGTGTGGT	s	T	1	Hs.529272	NM_022826:Hs.529272:Hs184: Membrane-associated ring finger (C3HC4) 7	15	2	4	4	0.13408	0.673901
GATCTTGCTGAAAGTGT	s	T	1	Hs.301685	BC003526:Hs.301685:Hs184: Plexin D1	15	6	6	5	0.323488	0.673901
GATCACTTTTTTTCTTT	s	T	1	Hs.533712	NM_002896:Hs.533712:Hs184: RNA binding motif protein 4	15	14	6	5	0.323488	0.673901
GATCCAGACTATAATCC	s	T	1	Hs.532164	NM_001007464:Hs.532164:Hs184: RWD domain containing 1	15	12	6	2	0.323488	0.673901
GATCATCCGCGGCGGCC	s	T	1	Hs.190520	NM_007080:Hs.190520:Hs184: LSM6 homolog, U6 small nuclear RNA associated (S. cerevisiae)	7	7	15	0	0.339505	0.793075
GATCATGAGTTCATGCG	s	T	1	Hs.409989	BC019916:Hs.409989:Hs184: NIMA (never in mitosis gene a)-related kinase 3	15	2	7	0	0.323488	0.778147
GATCGGCTCTGGGAGAC	s	T	1	Hs.144309	BM701069:Hs.144309:Hs184: Polycomb group ring finger 3	15	4	7	0	0.323488	0.778147
GATCCGCACGTCACCCA	s	T	1	Hs.419463	BF977433:Hs.419463:Hs184: Ribosomal protein L23a	15	6	7	0	0.323488	0.778147
GATCCGTGGTGTTGCAG	s	T	1	Hs.474970	BM677869:Hs.474970:Hs184: Rotavirus X protein associated with NSP3	15	6	7	0	0.323488	0.778147
GATCTGGGTATTTTTGG	s	T	1	Hs.114191	NM_017742:Hs.114191:Hs184: Zinc finger, CCHC domain containing 2	7	4	15	7	0.339505	0.793075
GATCCAAGTTTCACTTT	s	T	1	Hs.528818	CB154245:Hs.528818:Hs184: Transcribed locus, weakly similar to XP_375099.1 PREDICTED: similar to hypothetical protein FLJ25224 [Homo sapiens]	15	2	7	8	0.323488	0.778147
GATCCACCTTCCTTAGT	s	T	1	Hs.49853	AI291189:Hs.49853:Hs184: Cell division cycle and apoptosis regulator 1	7	0	15	7	0.339505	0.793075
GATCCTGGCAGCTTCCC	s	T	1	Hs.516122	BC036017:Hs.516122:Hs184: Hypothetical protein FLJ12788	8	1	15	3	0.598244	0.793075
GATCTGCTGTATGTTAC	s	T	1	Hs.209561	BE047362:Hs.209561:Hs184: KIAA1715	15	6	9	10	0.582585	0.836489
GATCCTAATCCCTTCCT	s	T	1	Hs.524484	NM_002206:Hs.524484:Hs184: Integrin, alpha 7	10	10	15	15	0.598244	0.845399
GATCATCTTTGAGTAGC	s	T	1	Hs.517232	AA830732:Hs.517232:Hs184: Peroxisomal biogenesis factor 19	10	0	15	0	0.598244	0.845399
GATCCTCCTCCAAGTTG	s	T	1	Hs.434375	AL080103:Hs.434375:Hs184: Protein tyrosine phosphatase, receptor type, B	10	4	15	15	0.598244	0.845399
GATCTGTTACCATCAGG	s	T	1	Hs.180758	NM_018590:Hs.180758:Hs184: Chondroitin sulfate GalNAcT-2	15	1	11	11	0.582585	0.836489
GATCTACACGTGTTGTT	s	T	1	Hs.179260	NM_024496:Hs.179260:Hs184: Chromosome 14 open reading frame 4	12	1	15	15	0.873976	0.860689
GATCCTGGCTGTGAGGA	s	T	1	Hs.159955	BC040736:Hs.159955:Hs184: GTPase, IMAP family member 1	12	5	15	15	0.873976	0.860689
GATCCACAGGGAGCAAC	s	T	1	Hs.409960	BM685050:Hs.409960:Hs184: Hypothetical protein MGC40579	12	2	15	7	0.873976	0.860689
GATCATGTGAGTTGGCC	s	T	1	Hs.26006	BC002729:Hs.26006:Hs184: HMT1 hnRNP methyltransferase-like 6 (S. cerevisiae)	12	1	15	0	0.873976	0.860689
GATCACCAGTCCTCCAC	s	T	1	Hs.199763	BC005101:Hs.199763:Hs184: Homo sapiens, clone IMAGE:3832417, mRNA	12	11	15	15	0.873976	0.860689
GATCCATGGAGACTCAC	s	T	1	Hs.108408	BC001230:Hs.108408:Hs184: Anterior pharynx defective 1 homolog A (C. elegans)	15	1	13	13	0.86845	0.859313
GATCAAGTTTGGCTCCC	s	T	1	Hs.200813	NM_024800:Hs.200813:Hs184: NIMA (never in mitosis gene a)- related kinase 11	15	2	13	2	0.86845	0.859313
GATCTAAGAAGTTGTGA	s	T	1	Hs.515271	NM_014884:Hs.515271:Hs184: Splicing factor, arginine/serine-rich 14	15	6	15	0	0.86845	0.868082
GATCCGTGAACTGCAGG	s	T	1	Hs.517937	AL832132:Hs.517937:Hs184: ALS2 C-terminal like	0	0	17	6	0.0180309	0.238835
GATCTATGGTGTTGGAT	s	T	1	Hs.131393	NM_207337:Hs.131393:Hs184: Hypothetical protein LOC196394	17	4	0	0	0.0344982	0.231134
GATCTTTGTTCTTGACC	s	T	1	Hs.472330	NM_020531:Hs.472330:Hs184: Chromosome 20 open reading frame 3	17	17	0	0	0.0344982	0.231134
GATCCCAAATGTTCCCA	s	T	1	Hs.415604	BQ022831:Hs.415604:Hs184: Chromosome 6 open reading frame 136	0	0	17	1	0.0180309	0.238835
GATCAACATCCCCCCAA	s	T	1	Hs.493771	NM_147202:Hs.493771:Hs184: Chromosome 9 open reading frame 25	17	16	0	0	0.0344982	0.231134
GATCGCAAGCTGTTGAT	s	T	1	Hs.412019	NM_015439:Hs.412019:Hs184: Chromosome 6 open reading frame 80	17	11	0	0	0.0344982	0.231134
GATCTGCGGTGGTCAGG	s	T	1	Hs.388220	NM_030911:Hs.388220:Hs184: Cytidine and dCMP deaminase domain containing 1	17	16	0	0	0.0344982	0.231134
GATCCAAAAACTCTCCC	s	T	1	Hs.475387	BQ774159:Hs.475387:Hs184: E2IG2 protein	0	0	17	16	0.0180309	0.238835
GATCCTCCTGTCTTGGG	s	T	1	Hs.518201	NM_138287:Hs.518201:Hs184: Deltex 3-like (Drosophila)	0	0	17	1	0.0180309	0.238835
GATCAACGTGCTGGAAG	s	T	1	Hs.516656	NM_004952:Hs.516656:Hs184: Ephrin-A3	17	16	0	0	0.0344982	0.231134
GATCATGCTTACTTGTA	s	T	1	Hs.504670	AA725611:Hs.504670:Hs184: KIAA1238 protein	0	0	17	16	0.0180309	0.238835
GATCATGTGCTGTAAAG	s	T	1	Hs.441734	NM_024091:Hs.441734:Hs184: Hypothetical protein MGC5297	17	3	0	0	0.0344982	0.231134
GATCCAGCAGGTGAATC	s	T	1	Hs.73769	BM662987:Hs.73769:Hs184: Folate receptor 1 (adult)	17	4	0	0	0.0344982	0.231134
GATCCTGCTCTCCAAGC	s	T	1	Hs.483390	AI814187:Hs.483390:Hs184: Follistatin-like 4	17	3	0	0	0.0344982	0.231134
GATCTGCTTCTCCCACG	s	T	1	Hs.534315	BC000115:Hs.534315:Hs184: Guanine nucleotide binding protein (G protein), beta polypeptide 3	17	6	0	0	0.0344982	0.231134
GATCTGGAGAGCAGGAG	s	T	1	Hs.516775	BC064933:Hs.516775:Hs184: Hypothetical protein FLJ20203	17	6	0	0	0.0344982	0.231134
GATCCTGCTGGGGCACA	s	T	1	Hs.553555	NM_138445:Hs.553555:Hs184: G protein-coupled receptor 146	17	4	0	0	0.0344982	0.231134
GATCATAGAAAGGAATT	s	T	1	Hs.98133	BC015047:Hs.98133:Hs184: Hydrolethalus syndrome 1	17	1	0	0	0.0344982	0.231134
GATCTAGAATTGACATT	s	T	1	Hs.28872	BC036478:Hs.28872:Hs184: KIAA1946	17	16	0	0	0.0344982	0.231134
GATCCCTGAATGACCAC	s	T	1	Hs.189914	AA815341:Hs.189914:Hs184: Hypothetical protein LOC202181	0	0	17	2	0.0180309	0.238835
GATCCCTACTTGGTAGT	s	T	1	Hs.444118	BC020268:Hs.444118:Hs184: MCM6 minichromosome maintenance deficient 6 (MIS5 homolog, S. pombe) (S. cerevisiae)	0	0	17	1	0.0180309	0.238835
GATCCGAGAACGCTCTA	s	T	1	Hs.365706	BC005272:Hs.365706:Hs184: Matrix Gla protein	0	0	17	17	0.0180309	0.238835
GATCCTCGGCGACGTTT	s	T	1	Hs.322854	AA769575:Hs.322854:Hs184: Napsin B aspartic peptidase pseudogene	0	0	17	6	0.0180309	0.238835
GATCCAGCTTCATTCAA	s	T	1	Hs.356630	BC002348:Hs.356630:Hs184: Nuclear transport factor 2	17	1	0	0	0.0344982	0.231134
GATCTGGAAAATGCAGC	s	T	1	Hs.464912	BC010136:Hs.464912:Hs184: Hypothetical protein FLJ10656	17	16	0	0	0.0344982	0.231134
GATCTGTGGACTTTCAT	s	T	1	Hs.516859	BQ006035:Hs.516859:Hs184: Pantothenate kinase 2 (Hallervorden-Spatz syndrome)	17	4	0	0	0.0344982	0.231134
GATCCAGGCTCCCCGGC	s	T	1	Hs.356399	AI381540:Hs.356399:Hs184: REST corepressor 3	0	0	17	9	0.0180309	0.238835
GATCATCATCTTTCAGG	s	T	1	Hs.57988	NM_022450:Hs.57988:Hs184: Rhomboid family 1 (Drosophila)	17	3	0	0	0.0344982	0.231134
GATCTCCATTTCCGCCA	s	T	1	Hs.434251	NM_015179:Hs.434251:Hs184: KIAA0690	17	17	0	0	0.0344982	0.231134
GATCTTTTCAGTGTGAT	s	T	1	Hs.269109	NM_006379:Hs.269109:Hs184: Sema domain, immunoglobulin domain (Ig), short basic domain, secreted, (semaphorin) 3C	17	3	0	0	0.0344982	0.231134
GATCTCCCCACTCTAGG	s	T	1	Hs.473721	AA428882:Hs.473721:Hs184: Solute carrier family 2 (facilitated glucose transporter), member 1	17	16	0	0	0.0344982	0.231134
GATCCTAGGTGCTGGAT	s	T	1	Hs.305971	BU739858:Hs.305971:Hs184: Solute carrier family 2 (facilitated glucose transporter), member 10	0	0	17	9	0.0180309	0.238835
GATCTATCTAAATGCCG	s	T	1	Hs.357901	NM_003107:Hs.357901:Hs184: SRY (sex determining region Y)-box 4	0	0	17	17	0.0180309	0.238835
GATCTGGTTCCCAGCCT	s	T	1	Hs.514033	AW016605:Hs.514033:Hs184: Sperm associated antigen 5	0	0	17	5	0.0180309	0.238835
GATCTTCAAACAAGCAT	s	T	1	Hs.369397	BC000097:Hs.369397:Hs184: Transforming growth factor, beta-induced, 68kDa	0	0	17	6	0.0180309	0.238835
GATCTTTTGTTTGGAGA	s	T	1	Hs.126598	BC040355:Hs.126598:Hs184: Transmembrane protein 45A	0	0	17	17	0.0180309	0.238835
GATCCATATGTACCAGA	s	T	1	Hs.388170	AI802937:Hs.388170:Hs184: Hypothetical protein FLJ10534	0	0	17	2	0.0180309	0.238835
GATCCTCAGGATGGAGG	s	T	1	Hs.463964	NM_017983:Hs.463964:Hs184: WD40 repeat protein Interacting with phosphoInositides of 49kDa	0	0	17	2	0.0180309	0.238835
GATCTGGACATTTCCAG	s	T	1	Hs.231942	BQ024831:Hs.231942:Hs184: YTH domain containing 2	17	3	0	0	0.0344982	0.231134
GATCTGACTAGCAGCAA	s	T	1	Hs.436792	AA649073:Hs.436792:Hs184: LIM domain only 4	17	16	0	0	0.0344982	0.231134
GATCTGTTTTGGATGTT	s	T	1	Hs.520974	AI040457:Hs.520974:Hs184: Tyrosine 3-monooxygenase/tryptophan 5-monooxygenase activation protein, gamma polypeptide	17	1	0	0	0.0344982	0.231134
GATCTGCCATGTAGAAT	s	T	1	Hs.378996	AI612739:Hs.378996:Hs184: Hyperparathyroidism 2 (with jaw tumor)	17	17	0	0	0.0344982	0.231134
GATCTCTTCCGGGGTAT	s	T	1	Hs.520087	BM666338:Hs.520087:Hs184: Protein kinase C and casein kinase substrate in neurons 1	17	3	0	0	0.0344982	0.231134
GATCTATCATTGTGTTT	s	T	1	Hs.516646	BM994657:Hs.516646:Hs184: CAMP responsive element binding protein 1	17	11	0	0	0.0344982	0.231134
GATCCCAGAGGAGGAAG	s	T	1	Hs.517622	BU732567:Hs.517622:Hs184: Unc-84 homolog B (C. elegans)	17	4	0	0	0.0344982	0.231134
GATCAACAGGTCTAAAA	s	T	1	Hs.235331	BX112444:Hs.235331:Hs184: Full length insert cDNA clone YY86C01	17	9	0	0	0.0344982	0.231134
GATCTTCAGATATTCAT	s	T	1	Hs.440320	CB143546:Hs.440320:Hs184: Cullin 5	17	17	0	0	0.0344982	0.231134
GATCCACCCACTCTCTG	s	T	1	Hs.322473	BC066124:Hs.322473:Hs184: FLJ46061 protein	17	1	2	2	0.13408	0.416223
GATCCGCTCCCCCAGCC	s	T	1	Hs.363315	NM_030765:Hs.363315:Hs184: UDP-GlcNAc:betaGal beta-1,3-N-acetylglucosaminyltransferase 4	2	2	17	16	0.0762406	0.428561
GATCCTTGAGCTCACGC	s	T	1	Hs.458973	BC085610:Hs.458973:Hs184: Zinc finger homeodomain 4	17	7	2	2	0.13408	0.416223
GATCTGTGGAGCTAAGC	s	T	1	Hs.529385	BC067873:Hs.529385:Hs184: Similar to annexin II receptor	3	3	17	2	0.0762406	0.428561
GATCATTTTGAGGCTGT	s	T	1	Hs.371045	NM_015540:Hs.371045:Hs184: RNA polymerase II associated protein 1	3	3	17	17	0.0762406	0.428561
GATCCCGAATCTCATTC	s	T	1	Hs.516777	NM_014521:Hs.516777:Hs184: SH3-domain binding protein 4	3	3	17	5	0.0762406	0.428561
GATCATCCCACATCCTT	s	T	1	Hs.22302	AJ420430:Hs.22302:Hs184: Full length insert cDNA clone ZD85A02	3	3	17	9	0.0762406	0.428561
GATCCCCACCAGTTCAA	s	T	1	Hs.426410	BC035810:Hs.426410:Hs184: High density lipoprotein-binding protein	17	1	4	4	0.13408	0.636756
GATCTGAACATGGCGGC	s	T	1	Hs.516697	BC021118:Hs.516697:Hs184: Myofibrillogenesis regulator 1	5	5	17	1	0.199125	0.650376
GATCCATCTGTCCTGTG	s	T	1	Hs.148609	NM_198920:Hs.148609:Hs184: Chromosome 6 open reading frame 157	5	2	17	5	0.199125	0.650376
GATCCAGTGTCATCGCT	s	T	1	Hs.55069	BM684486:Hs.55069:Hs184: Neurexophilin 3	5	5	17	9	0.199125	0.650376
GATCAGGACTGAGGGGT	s	T	1	Hs.459311	AA767218:Hs.459311:Hs184: Hypothetical protein DKFZp547K1113	17	7	6	6	0.323488	0.636756
GATCCTCAAGGCCTTGC	s	T	1	Hs.345588	BC014203:Hs.345588:Hs184: Hypothetical protein MGC45871	7	0	17	1	0.199125	0.746681
GATCCAGGGCCCCTGGA	s	T	1	Hs.463797	AA584381:Hs.463797:Hs184: Chromosome 1 open reading frame 33	7	7	17	17	0.199125	0.746681
GATCCTGAGGAAAGACT	s	T	1	Hs.383396	NM_001033:Hs.383396:Hs184: Ribonucleotide reductase M1 polypeptide	17	13	7	0	0.323488	0.734404
GATCAGTGCGGTTATGT	s	T	1	Hs.423163	NM_006416:Hs.423163:Hs184: Solute carrier family 35 (CMP-sialic acid transporter), member A1	17	1	7	7	0.323488	0.734404
GATCTAGTATGCTCCTG	s	T	1	Hs.158174	NM_007149:Hs.158174:Hs184: Zinc finger protein 184 (Kruppel-like)	17	1	7	8	0.323488	0.734404
GATCCTGTGTTTGTGGC	s	T	1	Hs.522543	NM_014694:Hs.522543:Hs184: ADAMTS-like 2	8	9	17	17	0.386033	0.746681
GATCTACTGCAAATCCT	s	T	1	Hs.530904	BC000992:Hs.530904:Hs184: Cysteine and glycine-rich protein 2	8	5	17	1	0.386033	0.746681
GATCGCGCCCTGCTCCC	s	T	1	Hs.515082	NM_018708:Hs.515082:Hs184: Fem-1 homolog a (C.elegans)	8	8	17	1	0.386033	0.746681
GATCAGTTCAGTATATT	s	T	1	Hs.475663	BC001267:Hs.475663:Hs184: RAB5A, member RAS oncogene family	17	3	9	10	0.582585	0.79333
GATCTACGAGCACATGG	s	T	1	Hs.516836	NM_015685:Hs.516836:Hs184: Syndecan binding protein (syntenin) 2	17	3	9	9	0.582585	0.79333
GATCCACTGCACTTGGG	s	T	1	Hs.432914	AW136595:Hs.432914:Hs184: CDNA FLJ25106 fis, clone CBR01467	17	3	9	2	0.582585	0.79333
GATCAAGTTCCCGCTTC	s	T	1	Hs.434367	CD368811:Hs.434367:Hs184: Thioredoxin reductase 1	17	16	9	9	0.582585	0.79333
GATCTGCGAAAGACCAA	s	T	1	Hs.438906	BX647272:Hs.438906:Hs184: Hypothetical protein MGC50372	10	3	17	5	0.386033	0.806271
GATCCCTGTGAAGACCC	s	T	1	Hs.143067	BC007998:Hs.143067:Hs184: KIAA1602 protein	17	7	11	0	0.582585	0.79333
GATCATGTTACCATATC	s	T	1	Hs.524390	BM705322:Hs.524390:Hs184: Tubulin, alpha, ubiquitous	17	4	11	11	0.582585	0.79333
GATCGTGTCGCTGCGGT	s	T	1	Hs.36959	BC031481:Hs.36959:Hs184: Testis expressed sequence 27	17	1	11	7	0.582585	0.79333
GATCCTGTCAAAATAGT	s	T	1	Hs.102696	NM_014060:Hs.102696:Hs184: Malignant T cell amplified sequence 1	12	5	17	1	0.615603	0.850127
GATCCAGAAGGAGAGTT	s	T	1	Hs.132121	NM_032291:Hs.132121:Hs184: Hypothetical protein DKFZp761D221	13	4	17	2	0.615603	0.850127
GATCCCAGGAAGGGCAC	s	T	1	Hs.24545	NM_018337:Hs.24545:Hs184: Zinc finger protein 444	13	1	17	13	0.615603	0.850127
GATCCTCTGAACCTGCA	s	T	1	Hs.534314	NM_001970:Hs.534314:Hs184: Eukaryotic translation initiation factor 5A	17	7	15	0	0.86845	0.85979
GATCTGCATAAACAGGG	s	T	1	Hs.485130	BQ576339:Hs.485130:Hs184: Major histocompatibility complex, class II, DP beta 1	15	2	17	9	0.859247	0.86084
GATCTGCAAAGAAAGCT	s	T	1	Hs.178011	NM_019606:Hs.178011:Hs184: Hypothetical protein FLJ20257	15	2	17	5	0.859247	0.86084
GATCACCATTGCTGACT	s	T	1	Hs.356331	AA143328:Hs.356331:Hs184: Peptidylprolyl isomerase A (cyclophilin A)	15	6	17	16	0.859247	0.86084
GATCTGGAGCGGTTGAG	s	T	1	Hs.129563	BC009261:Hs.129563:Hs184: Hypothetical protein FLJ20014	17	14	17	9	0.859247	0.867598
GATCCATTTTGTATGGT	s	T	1	Hs.411097	NM_015236:Hs.411097:Hs184: Latrophilin 3	17	9	17	9	0.859247	0.867598
GATCATGAATAACTGAT	s	T	1	Hs.268785	NM_004458:Hs.268785:Hs184: Acyl-CoA synthetase long-chain family member 4	18	1	0	0	0.0205587	0.231134
GATCTAGGAGAGGCGGC	s	T	1	Hs.434435	BC027241:Hs.434435:Hs184: Aldehyde dehydrogenase 1 family, member L1	18	2	0	0	0.0205587	0.231134
GATCATTATTTTTGCTG	s	T	1	Hs.62180	NM_018685:Hs.62180:Hs184: Anillin, actin binding protein (scraps homolog, Drosophila)	18	2	0	0	0.0205587	0.231134
GATCATCATCACGCGAG	s	T	1	Hs.435398	AI655320:Hs.435398:Hs184: Chromosome 16 open reading frame 55	18	2	0	0	0.0205587	0.231134
GATCCGCTAAGGGGCAT	s	T	1	Hs.29190	NM_178840:Hs.29190:Hs184: Hypothetical protein MGC24047	18	2	0	0	0.0205587	0.231134
GATCCTCAATACTGATT	s	T	1	Hs.285051	CA314883:Hs.285051:Hs184: Phosphatidylinositol glycan, class B	18	19	0	0	0.0205587	0.231134
GATCATGTGCAATATTT	s	T	1	Hs.388236	AA613532:Hs.388236:Hs184: Capicua homolog (Drosophila)	18	6	0	0	0.0205587	0.231134
GATCATGGCTGAAAAAG	s	T	1	Hs.85769	BC063040:Hs.85769:Hs184: Estrogen receptor binding protein	18	4	0	0	0.0205587	0.231134
GATCCCCATTTCTGGTC	s	T	1	Hs.516077	BC026293:Hs.516077:Hs184: Hypothetical protein FLJ14668	18	19	0	0	0.0205587	0.231134
GATCCTTTGGAATCTTG	s	T	1	Hs.406787	BC017107:Hs.406787:Hs184: F-box protein 3	18	12	0	0	0.0205587	0.231134
GATCCAACGCTACATGT	s	T	1	Hs.41296	AI765016:Hs.41296:Hs184: Fibronectin leucine rich transmembrane protein 3	18	1	0	0	0.0205587	0.231134
GATCTGTGGTCTCTGGA	s	T	1	Hs.381008	BG282479:Hs.381008:Hs184: Major histocompatibility complex, class I, E	18	8	0	0	0.0205587	0.231134
GATCAACTTGCAAAAGA	s	T	1	Hs.4187	NM_174887:Hs.4187:Hs184: Intraflagellar transport protein IFT20	18	11	0	0	0.0205587	0.231134
GATCTTCTGAGCTTGTT	s	T	1	Hs.528659	BC020306:Hs.528659:Hs184: KIAA1522 protein	18	9	0	0	0.0205587	0.231134
GATCTTCTTCAATATGT	s	T	1	Hs.446149	NM_002300:Hs.446149:Hs184: Lactate dehydrogenase B	18	4	0	0	0.0205587	0.231134
GATCATCTCTGTGACCG	s	T	1	Hs.184482	NM_015627:Hs.184482:Hs184: Low density lipoprotein receptor adaptor protein 1	18	1	0	0	0.0205587	0.231134
GATCACCTGACGTTGGG	s	T	1	Hs.317627	AV753446:Hs.317627:Hs184: Hypothetical protein LOC286411	18	19	0	0	0.0205587	0.231134
GATCAGCTTGAAATTCA	s	T	1	Hs.462684	BU741894:Hs.462684:Hs184: Hypothetical protein DKFZp667M2411	18	4	0	0	0.0205587	0.231134
GATCCAGAATAACTTCT	s	T	1	Hs.102788	AK024588:Hs.102788:Hs184: Mannosidase, alpha, class 1A, member 1	18	6	0	0	0.0205587	0.231134
GATCCAGCGACACTCTT	s	T	1	Hs.35758	AA381210:Hs.35758:Hs184: MYST histone acetyltransferase (monocytic leukemia) 4	18	2	0	0	0.0205587	0.231134
GATCATGATTTGCCACA	s	T	1	Hs.509343	BC011125:Hs.509343:Hs184: Pleckstrin homology domain containing, family C (with FERM domain) member 1	18	2	0	0	0.0205587	0.231134
GATCCTTTATCCTGATT	s	T	1	Hs.190544	AI992226:Hs.190544:Hs184: PX domain containing serine/threonine kinase	18	1	0	0	0.0205587	0.231134
GATCCGATGCCGGCAGC	s	T	1	Hs.436410	BM712831:Hs.436410:Hs184: Transforming growth factor beta regulator 1	18	1	0	0	0.0205587	0.231134
GATCTGCACCCTCTGAC	s	T	1	Hs.104476	NM_144626:Hs.104476:Hs184: Hypothetical protein MGC17299	18	19	0	0	0.0205587	0.231134
GATCTTGTTTGTTGAGG	s	T	1	Hs.116567	NM_182491:Hs.116567:Hs184: Hypothetical protein LOC90637	18	1	0	0	0.0205587	0.231134
GATCCCCTAATGCTCAG	s	T	1	Hs.515255	BG210935:Hs.515255:Hs184: LSM4 homolog, U6 small nuclear RNA associated (S. cerevisiae)	18	9	0	0	0.0205587	0.231134
GATCATCGTGGCTCCCA	s	T	1	Hs.99913	BM727728:Hs.99913:Hs184: Adrenergic, beta-1-, receptor	18	1	0	0	0.0205587	0.231134
GATCCTGAAAGCCACCA	s	T	1	Hs.121341	BX088955:Hs.121341:Hs184: Transcribed locus	18	12	0	0	0.0205587	0.231134
GATCTTTGCTCCTGGTA	s	T	1	Hs.102	AA804465:Hs.102:Hs184: Aminomethyltransferase (glycine cleavage system protein T)	18	6	2	2	0.0810829	0.416223
GATCTGACTTAGATGTC	s	T	1	Hs.173202	NM_020345:Hs.173202:Hs184: NFKB inhibitor interacting Ras-like 1	18	2	2	2	0.0810829	0.416223
GATCCACCATCTTATCT	s	T	1	Hs.500073	BG025950:Hs.500073:Hs184: Transcribed locus, moderately similar to XP_512541.1 PREDICTED: similar to hypothetical protein [Pan troglodytes]	18	1	2	2	0.0810829	0.416223
GATCCCCAAGTGTGAAC	s	T	1	Hs.479754	BC071593:Hs.479754:Hs184: V-kit Hardy-Zuckerman 4 feline sarcoma viral oncogene homolog	18	4	4	4	0.0810829	0.636756
GATCCTGCAGAAGAATA	s	T	1	Hs.317403	NM_025267:Hs.317403:Hs184: Hypothetical protein MGC2744	18	9	6	6	0.208452	0.636756
GATCCTGGGCCTGACCT	s	T	1	Hs.26518	NM_003271:Hs.26518:Hs184: Tetraspanin 4	18	1	6	5	0.208452	0.636756
GATCCGAGCCGCAGCAG	s	T	1	Hs.364337	BC062468:Hs.364337:Hs184: FLJ45224 protein	18	11	7	0	0.208452	0.734404
GATCTTGCTTCCAACTC	s	T	1	Hs.498187	NM_000254:Hs.498187:Hs184: 5-methyltetrahydrofolate-homocysteine methyltransferase	18	4	7	7	0.208452	0.734404
GATCATGAAGAAATGGC	s	T	1	Hs.27524	BC047657:Hs.27524:Hs184: Hypothetical protein FLJ30834	18	1	7	8	0.208452	0.734404
GATCTTCTCATTGGAGA	s	T	1	Hs.486084	NM_016487:Hs.486084:Hs184: Chromosome 6 open reading frame 203	18	6	9	10	0.404649	0.79333
GATCGCGTCCAGATGGA	s	T	1	Hs.517228	AA773759:Hs.517228:Hs184: T-cell lymphoma invasion and metastasis 1	18	4	9	2	0.404649	0.79333
GATCTGTTCCTTGGCAG	s	T	1	Hs.381099	BC007673:Hs.381099:Hs184: Lymphocyte cytosolic protein 1 (L-plastin)	18	2	11	3	0.404649	0.79333
GATCCGTGATTCATTGC	s	T	1	Hs.370424	BC030756:Hs.370424:Hs184: Zinc finger protein, X-linked	18	1	11	3	0.404649	0.79333
GATCATCGAGGACGAGA	s	T	1	Hs.502330	BC013573:Hs.502330:Hs184: GLI-Kruppel family member HKR3	18	1	13	13	0.648302	0.842283
GATCCACTGTGAGCACC	s	T	1	Hs.101742	NM_058192:Hs.101742:Hs184: RNA pseudouridylate synthase domain containing 1	18	1	15	15	0.648302	0.85979
GATCCGTTTGATTCCTT	s	T	1	Hs.468878	AK074292:Hs.468878:Hs184: Similar to BMP2 inducible kinase	18	1	17	1	0.907652	0.867598
GATCTGCCCTTGGCCTC	s	T	1	Hs.380389	AI697151:Hs.380389:Hs184: Chromosome 9 open reading frame 77	18	18	17	16	0.907652	0.867598
GATCCTCATAGGCACTT	s	T	1	Hs.188634	AF131792:Hs.188634:Hs184: Sorting nexin 1	18	2	17	1	0.907652	0.867598
GATCCTGAAGAGTGGCA	s	T	1	Hs.531587	NM_001017371:Hs.531587:Hs184: Sp3 transcription factor	18	18	17	6	0.907652	0.867598
GATCTGCTAAGTTGGGG	s	T	1	Hs.174273	AI032142:Hs.174273:Hs184: Transcribed locus	0	0	19	4	0.0180309	0.22588
GATCCTTGGAATAAAGA	s	T	1	Hs.22575	NM_181844:Hs.22575:Hs184: B-cell CLL/lymphoma 6, member B (zinc finger protein)	0	0	19	11	0.0180309	0.22588
GATCCGAGATGTGGGCA	s	T	1	Hs.213044	AL831911:Hs.213044:Hs184: FLJ39237 protein	0	0	19	8	0.0180309	0.22588
GATCTGTTTCACATTCC	s	T	1	Hs.546244	AI288400:Hs.546244:Hs184: Chromodomain helicase DNA binding protein 2	0	0	19	7	0.0180309	0.22588
GATCGCGCATTTTCCTG	s	T	1	Hs.379785	BC050467:Hs.379785:Hs184: Hypothetical protein FLJ35827	0	0	19	0	0.0180309	0.22588
GATCTTTGTAGCACCAT	s	T	1	Hs.96996	NM_006805:Hs.96996:Hs184: Heterogeneous nuclear ribonucleoprotein A0	0	0	19	8	0.0180309	0.22588
GATCCAGCAGTAATCCC	s	T	1	Hs.482269	NM_016338:Hs.482269:Hs184: Importin 11	0	0	19	3	0.0180309	0.22588
GATCCAGTCAACCACTT	s	T	1	Hs.375039	NM_145007:Hs.375039:Hs184: NACHT, leucine rich repeat and PYD containing 11	0	0	19	11	0.0180309	0.22588
GATCCACACACTGCTGT	s	T	1	Hs.534486	NM_024838:Hs.534486:Hs184: Threonine synthase-like 1 (bacterial)	0	0	19	3	0.0180309	0.22588
GATCAATTGGCTTACTT	s	T	1	Hs.116240	AW086457:Hs.116240:Hs184: Hypothetical protein MGC26979	0	0	19	3	0.0180309	0.22588
GATCTTTGGGGTTGGAG	s	T	1	Hs.549889	AA541606:Hs.549889:Hs184: CDNA FLJ12874 fis, clone NT2RP2003769	0	0	19	18	0.0180309	0.22588
GATCGCAAATTTCCTTT	s	T	1	Hs.360028	AI372925:Hs.360028:Hs184: Transcribed locus	0	0	19	12	0.0180309	0.22588
GATCCCGGGAGCTTTGC	s	T	1	Hs.446376	BC071633:Hs.446376:Hs184: Adenomatosis polyposis coli 2	0	0	19	0	0.0180309	0.22588
GATCTTCTCTTCCACCT	s	T	1	Hs.94542	NM_006020:Hs.94542:Hs184: AlkB, alkylation repair homolog (E. coli)	2	2	19	3	0.0762406	0.3963
GATCCTCTCTAAGGCCT	s	T	1	Hs.370041	NM_001454:Hs.370041:Hs184: Forkhead box J1	2	2	19	7	0.0762406	0.3963
GATCCCTCGGCTGGGGA	s	T	1	Hs.186756	NM_020832:Hs.186756:Hs184: KIAA1441 protein	2	2	19	18	0.0762406	0.3963
GATCCTTGTTCTGAAGT	s	T	1	Hs.32995	NM_024545:Hs.32995:Hs184: MSin3A-associated protein 130	3	0	19	0	0.0762406	0.3963
GATCCGATGGGAGTGTA	s	T	1	Hs.443735	NM_020382:Hs.443735:Hs184: PR/SET domain containing protein 8	3	0	19	4	0.0762406	0.3963
GATCCCCCATGAGGTGG	s	T	1	Hs.523664	BQ575937:Hs.523664:Hs184: Solute carrier family 39 (zinc transporter), member 13	3	3	19	3	0.0762406	0.3963
GATCGCACTGAAAGCAG	s	T	1	Hs.315369	BC022286:Hs.315369:Hs184: Aquaporin 4	5	5	19	4	0.199125	0.60678
GATCAGCCTCCGCAACA	s	T	1	Hs.531807	NM_001007231:Hs.531807:Hs184: Rho GTPase activating protein 25	7	0	19	3	0.199125	0.673597
GATCATGAAACAGTAGT	s	T	1	Hs.356061	AI470223:Hs.356061:Hs184: Microtubule-associated protein 1 light chain 3 beta	7	7	19	0	0.199125	0.673597
GATCCTTTGCTGTAAAC	s	T	1	Hs.546346	AA772094:Hs.546346:Hs184: KIAA1018 protein	7	6	19	0	0.199125	0.673597
GATCTGCAGGCCGCCGT	s	T	1	Hs.97840	BC033342:Hs.97840:Hs184: Hypothetical protein LOC284739	7	0	19	8	0.199125	0.673597
GATCATGAAGGGGGCGG	s	T	1	Hs.420796	NM_032750:Hs.420796:Hs184: Hypothetical protein MGC15429	8	2	19	19	0.386033	0.673597
GATCCTGTAGGTCAAAT	s	T	1	Hs.90073	AI198839:Hs.90073:Hs184: CSE1 chromosome segregation 1-like (yeast)	8	1	19	11	0.386033	0.673597
GATCCCCTGAAGGACTT	s	T	1	Hs.367935	BC026177:Hs.367935:Hs184: Similar to ribosomal protein S2; 40S ribosomal protein S2	12	5	19	7	0.615603	0.820372
GATCCTGAGATGCCCAC	s	T	1	Hs.290550	BC043188:Hs.290550:Hs184: CDNA FLJ43039 fis, clone BRTHA3003023	12	1	19	4	0.615603	0.820372
GATCCGAAAGCCTAGTA	s	T	1	Hs.460217	NM_153208:Hs.460217:Hs184: Hypothetical protein MGC35048	13	1	19	18	0.615603	0.820372
GATCTTCCAATCCAGAG	s	T	1	Hs.117062	BM665110:Hs.117062:Hs184: Apoptosis-inducing factor (AIF)-like mitochondrion-associated inducer of death	17	3	19	7	0.859247	0.860917
GATCTAGTTCCCCTGGA	s	T	1	Hs.7879	NM_001007245:Hs.7879:Hs184: Interferon-related developmental regulator 1	18	4	19	19	0.907652	0.860917
GATCCATAGCGAGAGTG	s	T	1	Hs.40919	BC015126:Hs.40919:Hs184: Asparagine-linked glycosylation 2 homolog (yeast, alpha-1,3-mannosyltransferase)	0	0	20	1	0.00957784	0.22588
GATCTGATGCCGCGGGG	s	T	1	Hs.148425	NM_145232:Hs.148425:Hs184: LOC90353	0	0	20	2	0.00957784	0.22588
GATCAGGGAACTAAGCA	s	T	1	Hs.143736	NM_080821:Hs.143736:Hs184: Chromosome 20 open reading frame 108	20	1	0	0	0.0205587	0.216203
GATCTGGCCTGCCCATG	s	T	1	Hs.29276	NM_017832:Hs.29276:Hs184: Hypothetical protein FLJ20457	20	19	0	0	0.0205587	0.216203
GATCTGCTTTAAGACTG	s	T	1	Hs.89387	AJ535621:Hs.89387:Hs184: Cancer susceptibility candidate 2	0	0	20	5	0.00957784	0.22588
GATCTTTCATGGCTGAG	s	T	1	Hs.176247	BC038514:Hs.176247:Hs184: Dipeptidylpeptidase 10	20	4	0	0	0.0205587	0.216203
GATCCTGTAAGTTGTCA	s	T	1	Hs.529495	NM_016141:Hs.529495:Hs184: Dynein, cytoplasmic, light intermediate polypeptide 1	20	1	0	0	0.0205587	0.216203
GATCATGGCAGCATGAA	s	T	1	Hs.503546	NM_013402:Hs.503546:Hs184: Fatty acid desaturase 1	20	6	0	0	0.0205587	0.216203
GATCTACAGGAGGGTGT	s	T	1	Hs.447962	AI636408:Hs.447962:Hs184: FLJ42875 protein	20	3	0	0	0.0205587	0.216203
GATCCTGCATGTTAATG	s	T	1	Hs.125898	AW269951:Hs.125898:Hs184: GNAS complex locus	20	9	0	0	0.0205587	0.216203
GATCTTCCCAATGTGAA	s	T	1	Hs.147361	AF052171:Hs.147361:Hs184: Glutamate receptor, metabotropic 5	20	3	0	0	0.0205587	0.216203
[truncated: 20,643 more rows]
