# Supplementary material for: Massively Parallel Signature Sequencing and Bioinformatics Analysis Identifies Up-Regulation of TGFBI and SOX4 in Human Glioblastoma
Source: PLoS One. 2010 Apr 19;5(4):e10210. doi: 10.1371/journal.pone.0010210 (PMC2856677; doi:10.1371/journal.pone.0010210)
Supplement: Table S2 — Known genes belonging to MPSS class 1 to 5. (4.27 MB XLS) [file pone.0010210.s002.xls]

## Sheet: out
Table S2: MPSS tags that belongs to class 1-5.
Signature	Significant	Selected_Step	Class	Gene Symbol	EntrezGene	Description	UI_HuBr_norm_SELECTED_MEAN_N	UI_HuBr_norm_SELECTED_MEAN_N (convert 0 to 0.9 to calculation of ratio)	UI_HuBr_norm_STDV	UI_HuBr_tumr_SELECTED_MEAN_N	UI_HuBr_tumr_STDV	GBM/Normal Ratio	P-Val: UI_HuBr_norm | UI_HuBr_tumr*	FDR
GATCTTCGTGGGGCCCC	s	T	1	A1BG	1	Alpha-1-B glycoprotein	0	0.9	0	15	4	16.6667	0.034404	0.383968
GATCCCGGCCTACGGCG	s	Th	3	A2BP1	54715	Ataxin 2-binding protein 1	139	139	6	7	4	0.0503597	1.01608e-09	0.0343782
GATCCACCCTCTTAATC	s	T	5	A2BP1	54715	Ataxin 2-binding protein 1	7	7	3	0	0	0	0.181179	0.618326
GATCTTGGAAATGCTTG	s	Th	1	A2M	2	Alpha-2-macroglobulin	0	0.9	0	52	57	57.7778	4.15955e-05	0.0503822
GATCTGTCTGAGACAAC	s	Th	1	AAAS	8086	Achalasia, adrenocortical insufficiency, alacrimia (Allgrove, triple-A)	67	67	13	31	3	0.462687	0.0472152	0.372561
GATCATGTCATCAGCAC	s	T	1	AACS	65985	Acetoacetyl-CoA synthetase	80	80	17	6	6	0.075	5.45157e-05	0.0343782
GATCCAGTCTTAAATTT	s	Th	4	AADAC	13	Arylacetamide deacetylase (esterase)	20	20	21	0	0	0	0.00981802	0.216203
GATCCGTTTGATTCCTT	s	T	1	AAK1	22848	AP2 associated kinase 1	18	18	1	17	1	0.944444	0.907652	0.867598
GATCCGCCGCTTGCGCC	s	Th	4	AAMP	14	Angio-associated, migratory cell protein	31	31	5	0	0	0	0.0020268	0.121827
GATCCTGGACTTTGCCC	s	Th	1	AAMP	14	Angio-associated, migratory cell protein	139	139	16	100	23	0.719424	0.163209	0.642156
GATCGTCACGCTCGCAT	s	T	1	AARS	16	Alanyl-tRNA synthetase	113	113	1	48	1	0.424779	0.00728256	0.129622
GATCCGCACATCTCGGC	s	T	4	AARS	16	Alanyl-tRNA synthetase	0	0.9	0	6	2	6.66667	0.134721	0.686951
GATCCAAATCGGGCCAT	s	T	2	AARS2	57505	Alanyl-tRNA synthetase 2, mitochondrial (putative)	10	10	0	48	3	4.8	0.00636678	0.171639
GATCCTGCAGAAGAATA	s	T	1	AARSD1	80755	Alanyl-tRNA synthetase domain containing 1	18	18	9	6	6	0.333333	0.208452	0.636756
GATCAGCAGTCTTCTGC	s	T	2	AARSD1	80755	Alanyl-tRNA synthetase domain containing 1	2	2	2	6	6	3	0.49943	0.848303
GATCTTGGAATCTCAGA	s	Th	1	AASDH	132949	Aminoadipate-semialdehyde dehydrogenase	5	5	5	34	2	6.8	0.00974807	0.209474
GATCAAACCTAATCCGC	s	Th	3	AASDH	132949	Aminoadipate-semialdehyde dehydrogenase	14	14	14	0	0	0	0.0290848	0.372717
GATCAGGTTACAGAGAA	s	Th	1	AASDHPPT	60496	Aminoadipate-semialdehyde dehydrogenase-phosphopantetheinyl transferase	164	164	1	57	62	0.347561	7.81278e-05	0.043986
GATCACTTCATTAGGCA	s	Th	4	AASS	10157	Aminoadipate-semialdehyde synthase	22	22	1	0	0	0	0.00981802	0.173524
GATCAGGTGGCCATGGG	s	T	1	AATF	26574	Apoptosis antagonizing transcription factor	38	38	7	78	6	2.05263	0.0585772	0.399322
GATCAGGGGTGGAGGGG	s	Th	3	AATK	9625	Apoptosis-associated tyrosine kinase	192	192	21	0	0	0	1.53211e-14	0.0343782
GATCCTGCAGCTCCGTG	s	T	5	AATK	9625	Apoptosis-associated tyrosine kinase	0	0.9	0	46	4	51.1111	0.000137089	0.0620318
GATCTTGTTCACAAGTA	s	Th	1	ABAT	18	4-aminobutyrate aminotransferase	8	8	1	0	0	0	0.0909465	0.618326
GATCCGAGCCAACCATC	s	Th	1	ABBA-1	92154	Actin-bundling protein with BAIAP2 homology	484	484	20	1265	75	2.61364	0	0.0343782
GATCCAGACCAAGCGCC	s	T	4	ABBA-1	92154	Actin-bundling protein with BAIAP2 homology	10	10	10	0	0	0	0.101495	0.433224
GATCTATTTTTGCACTG	s	Th	1	ABCA1	19	ATP-binding cassette, sub-family A (ABC1), member 1	0	0.9	0	28	30	31.1111	0.00211292	0.156764
GATCACGGTGCGGACCA	s	Th	1	ABCA2	20	ATP-binding cassette, sub-family A (ABC1), member 2	637	637	15	125	95	0.196232	0	0.0343782
GATCTCCTGGAAGGACG	s	Th	4	ABCA2	20	ATP-binding cassette, sub-family A (ABC1), member 2	23	23	6	0	0	0	0.00577204	0.173524
GATCCGCCGCGCCTACT	s	T	4	ABCA2	20	ATP-binding cassette, sub-family A (ABC1), member 2	5	5	5	0	0	0	0.181179	0.678357
GATCTGCCCCCGCTGGT	s	T	4	ABCA2	20	ATP-binding cassette, sub-family A (ABC1), member 2	0	0.9	0	6	5	6.66667	0.134721	0.686951
GATCACTGTCAGTGGAG	s	Th	1	ABCA3	21	ATP-binding cassette, sub-family A (ABC1), member 3	153	153	18	89	6	0.581699	0.0207583	0.225877
GATCCCAAAGCCAAACA	s	T	1	ABCA5	23461	ATP-binding cassette, sub-family A (ABC1), member 5	10	10	4	0	0	0	0.101495	0.433224
GATCCTCGTCATCAAGG	s	T	1	ABCB6	10058	ATP-binding cassette, sub-family B (MDR/TAP), member 6	70	70	17	43	12	0.614286	0.212376	0.622675
GATCAGGGTAAGGTAGC	s	Th	1	ABCB7	22	ATP-binding cassette, sub-family B (MDR/TAP), member 7	2	2	2	62	12	31	3.55173e-05	0.043986
GATCGTGGCCCTCGTGG	s	Th	2	ABCB8	11194	ATP-binding cassette, sub-family B (MDR/TAP), member 8	41	41	1	49	7	1.19512	0.612271	0.845737
GATCTGGCTTTGCCAGA	s	T	1	ABCB9	23457	ATP-binding cassette, sub-family B (MDR/TAP), member 9	37	37	15	0	0	0	0.00171353	0.073078
GATCCCAGTTGGCTATC	s	T	4	ABCC10	89845	ATP-binding cassette, sub-family C (CFTR/MRP), member 10	0	0.9	0	7	7	7.77778	0.134721	0.636774
GATCCCCAAGTGGTGAA	s	T	1	ABCC3	8714	ATP-binding cassette, sub-family C (CFTR/MRP), member 3	3	3	0	58	23	19.3333	0.000106657	0.0512997
GATCCCCCATAGGTGGC	s	T	4	ABCC3	8714	ATP-binding cassette, sub-family C (CFTR/MRP), member 3	0	0.9	0	4	4	4.44444	0.290216	0.686951
GATCTCGCTGTGTTGTC	s	Th	1	ABCC4	10257	ATP-binding cassette, sub-family C (CFTR/MRP), member 4	0	0.9	0	16	5	17.7778	0.021955	0.383968
GATCATAATGAGGTTTG	s	Th	1	ABCC4	10257	ATP-binding cassette, sub-family C (CFTR/MRP), member 4	5	5	1	0	0	0	0.167517	0.678357
GATCACAGAGACATTCC	s	Th	1	ABCC5	10057	ATP-binding cassette, sub-family C (CFTR/MRP), member 5	19	19	7	26	2	1.36842	0.531495	0.857014
GATCTGTAATCTGGTTG	s	T	5	ABCC8	6833	ATP-binding cassette, sub-family C (CFTR/MRP), member 8	35	35	0	0	0	0	0.00171353	0.0929818
GATCGTCCTGAAGCGGG	s	T	1	ABCC8	6833	ATP-binding cassette, sub-family C (CFTR/MRP), member 8	252	252	33	193	3	0.765873	0.136124	0.601865
GATCCCACGGGAGAGGG	s	T	3	ABCD1	215	ATP-binding cassette, sub-family D (ALD), member 1	0	0.9	0	26	1	28.8889	0.0051375	0.169253
GATCCTAAGCGAAGATG	s	T	1	ABCD3	5825	ATP-binding cassette, sub-family D (ALD), member 3	30	30	1	0	0	0	0.00456115	0.121827
GATCCAAACAACTATAG	s	T	1	ABCE1	6059	ATP-binding cassette, sub-family E (OABP), member 1	5	5	5	2	2	0.4	0.630424	0.844415
GATCAATAAGGCCGTAT	s	Th	1	ABCF1	23	ATP-binding cassette, sub-family F (GCN20), member 1	6	6	6	43	10	7.16667	0.00333243	0.128427
GATCCCACTCTGATTGC	s	Th	1	ABCF1	23	ATP-binding cassette, sub-family F (GCN20), member 1	16	16	7	11	1	0.6875	0.794523	0.836489
GATCCTCGTTTTCTGGG	s	T	1	ABCF2	10061	ATP-binding cassette, sub-family F (GCN20), member 2	33	33	9	169	24	5.12121	1.62507e-07	0.0343782
GATCCAGCGTCAGTGTG	s	T	5	ABCF2	10061	ATP-binding cassette, sub-family F (GCN20), member 2	0	0.9	0	4	4	4.44444	0.290216	0.686951
GATCTCGAGTCTCGCAT	s	T	1	ABCF3	55324	ATP-binding cassette, sub-family F (GCN20), member 3	0	0.9	0	9	2	10	0.0669655	0.594545
GATCTCTCACCCTGGGG	s	Th	3	ABCG2	9429	ATP-binding cassette, sub-family G (WHITE), member 2	0	0.9	0	28	9	31.1111	0.00211292	0.156764
GATCCCTGGAGTTCAGG	s	Th	1	ABCG4	64137	ATP-binding cassette, sub-family G (WHITE), member 4	5	5	1	0	0	0	0.167517	0.678357
GATCCACGCTGACCGCC	s	Th	4	ABHD11	83451	Abhydrolase domain containing 11	0	0.9	0	5	5	5.55556	0.147326	0.686951
GATCTGCACTTCCTCCC	s	T	1	ABHD12	26090	Abhydrolase domain containing 12	83	83	0	154	17	1.85542	0.0111074	0.227882
GATCCCAGCATGTGGTC	s	Th	1	ABHD12	26090	Abhydrolase domain containing 12	0	0.9	0	7	7	7.77778	0.147326	0.636774
GATCAAGGTTTGAATCA	s	Th	2	ABHD12	26090	Abhydrolase domain containing 12	0	0.9	0	5	1	5.55556	0.147326	0.686951
GATCATGAAGGGGGCGG	s	T	1	ABHD14B	84836	Abhydrolase domain containing 14B	8	8	2	19	19	2.375	0.386033	0.673597
GATCACACACAAGGCTG	s	Th	5	ABHD2	11057	Abhydrolase domain containing 2	0	0.9	0	21	7	23.3333	0.00670973	0.22588
GATCAGTTGAGCCCGGG	s	Th	4	ABHD3	171586	Abhydrolase domain containing 3	0	0.9	0	51	12	56.6667	4.15955e-05	0.0512997
GATCGTGTCTTCAAGCA	s	T	1	ABHD3	171586	Abhydrolase domain containing 3	7	7	4	0	0	0	0.181179	0.618326
GATCTGGAGCAGCAGTC	s	Th	5	ABHD4	63874	Abhydrolase domain containing 4	42	42	3	0	0	0	0.000260508	0.0620318
GATCTGCGACTCAGTTG	s	Th	1	ABHD4	63874	Abhydrolase domain containing 4	28	28	2	25	4	0.892857	0.88685	0.860415
GATCCTGCCCCAAATGC	s	T	1	ABHD6	57406	Abhydrolase domain containing 6	158	158	2	98	8	0.620253	0.0519957	0.36971
GATCCTGGGACCCACGA	s	T	1	ABHD8	79575	Abhydrolase domain containing 8	159	159	26	43	7	0.27044	2.43665e-05	0.0343782
GATCTATTTTTGCCCAA	s	Th	4	ABHD8	79575	Abhydrolase domain containing 8	37	37	11	0	0	0	0.000722659	0.073078
GATCCTGCTTGGGCCCC	s	T	1	ABI1	10006	Abl-interactor 1	86	86	20	240	37	2.7907	3.65982e-06	0.0343782
GATCAGCTAGCTACCTT	s	Th	1	ABI1	10006	Abl-interactor 1	8	8	8	0	0	0	0.0909465	0.618326
GATCTGGCCAGTTGTAC	s	Th	1	ABI2	10152	Abl interactor 2	159	159	23	102	2	0.641509	0.046691	0.39591
GATCCAAGTCCAAAATC	s	T	5	ABI2	10152	Abl interactor 2	7	7	0	0	0	0	0.181179	0.618326
GATCTGCTCACTTCTGG	s	T	4	ABI2	10152	Abl interactor 2	76	76	13	69	8	0.907895	0.798899	0.852106
GATCAAGGACCTCAGCA	s	Th	1	ABI3	51225	ABI gene family, member 3	16	16	6	20	18	1.25	0.702239	0.853211
GATCACTTTGCCAGCTG	s	Th	5	ABL2	27	V-abl Abelson murine leukemia viral oncogene homolog 2 (arg, Abelson-related gene)	27	27	4	0	0	0	0.00341255	0.129606
GATCTTTCCTTGGATGA	s	Th	1	ABL2	27	V-abl Abelson murine leukemia viral oncogene homolog 2 (arg, Abelson-related gene)	9	9	6	0	0	0	0.0909465	0.433224
GATCCCTACCTGCTCCC	s	Th	1	ABLIM1	3983	Actin binding LIM protein 1	111	111	24	49	3	0.441441	0.00564346	0.169773
GATCCCAGGAAGCCTGG	s	Th	1	ABLIM2	84448	Actin binding LIM protein family, member 2	34	34	7	2	2	0.0588235	0.00505762	0.127278
GATCTTTGTAGATTGGG	s	T	3	ABLIM3	22885	Actin binding LIM protein family, member 3	12	12	5	0	0	0	0.0586249	0.399179
GATCAGCGTGGTGACGA	s	T	1	ABR	29	Active BCR-related gene	206	206	25	7	0	0.0339806	1.6338e-12	0.0343782
GATCTACATTAACCAGC	s	Th	4	ABR	29	Active BCR-related gene	0	0.9	0	30	4	33.3333	0.00211292	0.127163
GATCGTGACTACCCGGG	s	Th	1	ABT1	29777	Activator of basal transcription 1	50	50	11	77	2	1.54	0.155837	0.675924
GATCCCCCCTACCCACC	s	Th	1	ABTB1	80325	Ankyrin repeat and BTB (POZ) domain containing 1	142	142	32	77	15	0.542254	0.0152305	0.223993
GATCAAGGCACTTCAAC	s	Th	1	ACAA1	30	Acetyl-Coenzyme A acyltransferase 1 (peroxisomal 3-oxoacyl-Coenzyme A thiolase)	37	37	14	0	0	0	0.000722659	0.073078
GATCATGAATAGGAGCC	s	T	1	ACAA2	10449	Acetyl-Coenzyme A acyltransferase 2 (mitochondrial 3-oxoacyl-Coenzyme A thiolase)	76	76	13	33	8	0.434211	0.0306486	0.231102
GATCAGCCTGCCCAACG	s	Th	4	ACAA2	10449	Acetyl-Coenzyme A acyltransferase 2 (mitochondrial 3-oxoacyl-Coenzyme A thiolase)	5	5	5	0	0	0	0.167517	0.678357
GATCCTGCAGGCCAGCG	s	T	1	ACACB	32	Acetyl-Coenzyme A carboxylase beta	5	5	5	0	0	0	0.181179	0.678357
GATCCTCTGGTTTCTTC	s	Th	1	ACACB	32	Acetyl-Coenzyme A carboxylase beta	6	6	3	0	0	0	0.167517	0.678357
GATCGGGTTCTCAGAGA	s	Th	1	ACAD10	80724	Acyl-Coenzyme A dehydrogenase family, member 10	0	0.9	0	30	4	33.3333	0.00211292	0.127163
GATCCGGTGTTTGTGGC	s	T	3	ACAD10	80724	Acyl-Coenzyme A dehydrogenase family, member 10	56	56	4	22	23	0.392857	0.0425226	0.384014
GATCCCTGGTGTGTTGT	s	T	1	ACAD11	84129	Acyl-Coenzyme A dehydrogenase family, member 11	85	85	12	54	12	0.635294	0.173327	0.636808
GATCCTTGAGAAGCGAG	s	T	3	ACAD9	28976	Acyl-Coenzyme A dehydrogenase family, member 9	15	15	12	128	6	8.53333	3.30132e-07	0.0343782
GATCCCCCACTGACCTC	s	T	1	ACAD9	28976	Acyl-Coenzyme A dehydrogenase family, member 9	0	0.9	0	6	5	6.66667	0.134721	0.686951
GATCCTAAAGCTCCTGC	s	T	3	ACADM	34	Acyl-Coenzyme A dehydrogenase, C-4 to C-12 straight chain	5	5	5	0	0	0	0.181179	0.678357
GATCCGAGAGGGCATGG	s	T	1	ACADVL	37	Acyl-Coenzyme A dehydrogenase, very long chain	521	521	44	1517	138	2.91171	0	0.0343782
GATCCTCTGGTAACAGG	s	Th	4	ACADVL	37	Acyl-Coenzyme A dehydrogenase, very long chain	8	8	1	0	0	0	0.0909465	0.618326
GATCAGGACAAGGTTGC	s	Th	4	ACAT2	39	Acetyl-Coenzyme A acetyltransferase 2 (acetoacetyl Coenzyme A thiolase)	28	28	18	61	4	2.17857	0.0434691	0.42505
GATCTCGTTCAGAATGA	s	Th	1	ACBD3	64746	Acyl-Coenzyme A binding domain containing 3	12	12	7	0	0	0	0.0509456	0.399179
GATCGGGTCTCAGCCCC	s	Th	1	ACBD4	79777	Acyl-Coenzyme A binding domain containing 4	31	31	1	0	0	0	0.0020268	0.121827
GATCCAGGTTGGAATCC	s	T	4	ACBD6	84320	Acyl-Coenzyme A binding domain containing 6	0	0.9	0	4	4	4.44444	0.290216	0.686951
GATCCCCAGCAAAGCCT	s	Th	4	ACCN2	41	Amiloride-sensitive cation channel 2, neuronal	0	0.9	0	8	9	8.88889	0.0759457	0.636774
GATCATACCTCCCCAGA	s	Th	1	ACCN2	41	Amiloride-sensitive cation channel 2, neuronal	70	70	9	90	11	1.28571	0.382042	0.803952
GATCCTAGACTACCTCT	s	Th	1	ACCN3	9311	Amiloride-sensitive cation channel 3	20	20	2	3	4	0.15	0.0400585	0.388546
GATCCCCAGCACATTCT	s	Th	1	ACCN4	55515	Amiloride-sensitive cation channel 4, pituitary	0	0.9	0	20	2	22.2222	0.0120792	0.22588
GATCTCTCCAGCCTTAA	s	Th	4	ACD	65057	Adrenocortical dysplasia homolog (mouse)	0	0.9	0	28	30	31.1111	0.00211292	0.156764
GATCGCTGCTCAGACCT	s	T	1	ACHE	43	Acetylcholinesterase (Yt blood group)	133	133	15	102	1	0.766917	0.31967	0.688706
GATCAAGGTCCCGTGAC	s	Th	3	ACIN1	22985	Apoptotic chromatin condensation inducer 1	6	6	3	23	5	3.83333	0.0818301	0.430391
GATCGCAGGGACACCAA	s	Th	1	ACIN1	22985	Apoptotic chromatin condensation inducer 1	119	119	29	90	12	0.756303	0.30129	0.713665
GATCCGCAAGATGGCCA	s	T	3	ACO1	48	Aconitase 1, soluble	5	5	1	0	0	0	0.181179	0.678357
GATCGTACTGACACCTT	s	Th	1	ACO2	50	Aconitase 2, mitochondrial	30	30	6	0	0	0	0.0020268	0.121827
GATCACTTGGTGCCTGA	s	Th	1	ACO2	50	Aconitase 2, mitochondrial	19	19	18	3	4	0.157895	0.0678473	0.388546
GATCTTAAGCAGCTCCA	s	Th	2	ACO2	50	Aconitase 2, mitochondrial	70	70	4	54	1	0.771429	0.42655	0.793467
GATCATTTCATTGGTGG	s	Th	1	ACO2	50	Aconitase 2, mitochondrial	180	180	52	167	43	0.927778	0.676903	0.836547
GATCATGTGGCCTCTCT	s	T	1	ACOT2	10965	Acyl-CoA thioesterase 2	105	105	1	82	9	0.780952	0.341639	0.754768
GATCGAGGTGTTGGTGG	s	Th	1	ACOT7	11332	Acyl-CoA thioesterase 7	689	689	57	276	35	0.400581	1.14797e-13	0.0343782
GATCCGAGTGAAGCCCC	s	Th	1	ACOT8	10005	Acyl-CoA thioesterase 8	134	134	8	71	3	0.529851	0.0159759	0.213176
GATCCCAGTAGACTATG	s	T	3	ACOX1	51	Acyl-Coenzyme A oxidase 1, palmitoyl	0	0.9	0	9	2	10	0.0669655	0.594545
GATCCCTATTATGGGAA	s	T	1	ACP1	52	Acid phosphatase 1, soluble	13	13	1	0	0	0	0.0586249	0.399179
GATCACCCATTGCAGAA	s	Th	4	ACP1	52	Acid phosphatase 1, soluble	8	8	8	0	0	0	0.0909465	0.618326
GATCACCCAACAGCCAG	s	Th	3	ACP2	53	Acid phosphatase 2, lysosomal	78	78	6	0	0	0	1.06276e-06	0.0343782
GATCTTTGAGCTTTGGC	s	T	1	ACPL2	92370	Acid phosphatase-like 2	8	8	2	0	0	0	0.101495	0.618326
GATCCTGAGGCTAACCC	s	T	4	ACRC	93953	Acidic repeat containing	0	0.9	0	4	0	4.44444	0.290216	0.686951
GATCTACCTTGGGTCTT	s	Th	1	ACRC	93953	Acidic repeat containing	2	2	2	10	3	5	0.294196	0.734393
GATCAGCTCTCCTTCCA	s	T	1	ACSBG1	23205	Acyl-CoA synthetase bubblegum family member 1	95	95	5	154	24	1.62105	0.0436038	0.410216
GATCCAGAAATTCAAAC	s	T	2	ACSF2	80221	Acyl-CoA synthetase family member 2	7	7	4	0	0	0	0.181179	0.618326
GATCCTGCCCCGTGGCC	s	T	4	ACSF3	197322	Acyl-CoA synthetase family member 3	0	0.9	0	9	9	10	0.0669655	0.594545
GATCCCGCGGAACCAGA	s	Th	1	ACSF3	197322	Acyl-CoA synthetase family member 3	70	70	4	49	1	0.7	0.250884	0.744433
GATCATGAATAACTGAT	s	T	1	ACSL4	2182	Acyl-CoA synthetase long-chain family member 4	18	18	1	0	0	0	0.0205587	0.231134
GATCCCGCCACTGTACT	s	Th	4	ACSL6	23305	Acyl-CoA synthetase long-chain family member 6	53	53	11	0	0	0	5.72305e-05	0.0435195
GATCCATGGGGAAGGCG	s	Th	5	ACSM5	54988	Acyl-CoA synthetase medium-chain family member 5	20	20	5	0	0	0	0.00981802	0.216203
GATCTGTAAGGGAAGAA	s	Th	1	ACSS1	84532	Acyl-CoA synthetase short-chain family member 1	0	0.9	0	16	15	17.7778	0.021955	0.383968
GATCTGTAGGGGAGGGA	s	Th	1	ACSS1	84532	Acyl-CoA synthetase short-chain family member 1	112	112	20	166	19	1.48214	0.0663998	0.607334
GATCAGCAAACAGGAAT	s	T	1	ACTA2	59	Actin, alpha 2, smooth muscle, aorta	3	3	3	4	4	1.33333	0.93679	0.848303
GATCCAGCAGCACGGAG	s	T	4	ACTB	60	Actin, beta	0	0.9	0	65	0	72.2222	7.21998e-06	0.0343782
GATCAGCAAGCAGGAGT	s	T	1	ACTB	60	Actin, beta	4647	4647	195	8644	755	1.86012	0	0.0343782
GATCCTCACCGAGCGCG	s	T	2	ACTB	60	Actin, beta	22	22	1	76	22	3.45455	0.00321186	0.156691
GATCCCCTGCCCATGGC	s	T	5	ACTB	60	Actin, beta	12	12	11	0	0	0	0.0586249	0.399179
GATCATGTCGGAGACCT	s	T	4	ACTB	60	Actin, beta	10	10	3	0	0	0	0.101495	0.433224
GATCATTGCTCCTCCTG	s	Th	1	ACTB	60	Actin, beta	0	0.9	0	5	5	5.55556	0.147326	0.686951
GATCGGTGGCTCCATCC	s	Th	1	ACTG1	71	Actin, gamma 1	2129	2129	38	4359	183	2.04744	0	0.0343782
GATCCTCCTTTCTCTGG	s	T	4	ACTG1	71	Actin, gamma 1	0	0.9	0	6	2	6.66667	0.134721	0.686951
GATCATCGCACCCCCAG	s	T	1	ACTG1	71	Actin, gamma 1	13	13	3	24	1	1.84615	0.274854	0.745141
GATCCTCCCTGCCCGCG	s	T	1	ACTN1	87	Actinin, alpha 1	415	415	30	321	65	0.773494	0.0722097	0.38553
GATCTGTGATGCTGAGC	s	T	1	ACTN2	88	Actinin, alpha 2	48	48	10	19	19	0.395833	0.0467196	0.407166
GATCGGGCGCATCTCCA	s	Th	3	ACTN4	81	Actinin, alpha 4	0	0.9	0	7	3	7.77778	0.147326	0.636774
GATCCTCACCCGCGACG	s	Th	2	ACTN4	81	Actinin, alpha 4	6	6	6	0	0	0	0.167517	0.678357
GATCTTGTGCCATTCTT	s	T	1	ACTR1A	10121	ARP1 actin-related protein 1 homolog A, centractin alpha (yeast)	25	25	3	0	0	0	0.00748908	0.161136
GATCCATCCACAGAAAA	s	T	1	ACTR1A	10121	ARP1 actin-related protein 1 homolog A, centractin alpha (yeast)	12	12	5	0	0	0	0.0586249	0.399179
GATCTCAGCCCCGCAGG	s	Th	3	ACTR1B	10120	ARP1 actin-related protein 1 homolog B, centractin beta (yeast)	155	155	13	80	18	0.516129	0.00742731	0.160259
GATCTTAGAGTCACTTT	s	Th	1	ACTR2	10097	ARP2 actin-related protein 2 homolog (yeast)	109	109	10	25	4	0.229358	7.52125e-05	0.043986
GATCAATGCTGGCTTCC	s	Th	1	ACTR3	10096	ARP3 actin-related protein 3 homolog (yeast)	158	158	16	38	2	0.240506	2.33686e-06	0.0343782
GATCAAGCCGAAGCCTG	s	Th	1	ACTR3B	57180	ARP3 actin-related protein 3 homolog B (yeast)	155	155	23	21	3	0.135484	3.52177e-08	0.0343782
GATCCATAGTGCTACCT	s	T	1	ACVR1B	91	Activin A receptor, type IB	40	40	12	95	19	2.375	0.0087818	0.213631
GATCTGCTAAGTTGGGG	s	T	1	ACVR2B	93	Activin A receptor, type IIB	0	0.9	0	19	4	21.1111	0.0180309	0.22588
GATCATGCCTGCTGCCA	s	T	1	ACY1	95	Aminoacylase 1	13	13	7	28	9	2.15385	0.176764	0.675476
GATCCGCATCAGCGGTT	s	T	3	ACY3	91703	Aspartoacylase (aminocyclase) 3	5	5	2	0	0	0	0.181179	0.678357
GATCCTGGCAGCCGGTG	s	T	1	ACYP1	97	Acylphosphatase 1, erythrocyte (common) type	5	5	5	6	6	1.2	0.910701	0.883973
GATCACCAGTGACCAGT	s	Th	1	ADAL	161823	Adenosine deaminase-like	31	31	5	0	0	0	0.0020268	0.121827
GATCGCTTGAGTCTGGA	s	Th	5	ADAL	161823	Adenosine deaminase-like	0	0.9	0	8	8	8.88889	0.0759457	0.636774
GATCTGGTGGACTTTGT	s	Th	1	ADAL	161823	Adenosine deaminase-like	17	17	2	8	9	0.470588	0.353765	0.734404
GATCACATCCTGGGGCT	s	Th	1	ADAM11	4185	ADAM metallopeptidase domain 11	94	94	16	7	1	0.0744681	1.48355e-06	0.0343782
GATCTCCTGGGGGCACA	s	Th	1	ADAM15	8751	ADAM metallopeptidase domain 15	5	5	5	0	0	0	0.167517	0.678357
GATCGGGGTGCCCCTCA	s	Th	4	ADAM15	8751	ADAM metallopeptidase domain 15	6	6	6	11	12	1.83333	0.380845	0.820362
GATCACTTGTCTTGTGG	s	Th	1	ADAMTS1	9510	ADAM metallopeptidase with thrombospondin type 1 motif, 1	22	22	4	5	5	0.227273	0.110896	0.420916
GATCCACCCCAACCTCT	s	Th	1	ADAMTS10	81794	ADAM metallopeptidase with thrombospondin type 1 motif, 10	0	0.9	0	5	5	5.55556	0.147326	0.686951
GATCCGGGACACCCACA	s	T	1	ADAMTS13	11093	ADAM metallopeptidase with thrombospondin type 1 motif, 13	0	0.9	0	11	11	12.2222	0.0669655	0.594545
GATCACACAGCAAGACC	s	Th	1	ADAMTS2	9509	ADAM metallopeptidase with thrombospondin type 1 motif, 2	6	6	0	0	0	0	0.167517	0.678357
GATCCTTCGGCGGCGCC	s	Th	5	ADAMTS4	9507	ADAM metallopeptidase with thrombospondin type 1 motif, 4	39	39	3	0	0	0	0.000433378	0.0699457
GATCCTTTTGGAGTCAG	s	T	1	ADAMTS4	9507	ADAM metallopeptidase with thrombospondin type 1 motif, 4	86	86	7	32	9	0.372093	0.0108853	0.167553
GATCACCCAATGCCAAG	s	Th	3	ADAMTS5	11096	ADAM metallopeptidase with thrombospondin type 1 motif, 5 (aggrecanase-2)	23	23	7	0	0	0	0.00577204	0.173524
GATCAGCAAAACATTCA	s	T	1	ADAMTS5	11096	ADAM metallopeptidase with thrombospondin type 1 motif, 5 (aggrecanase-2)	7	7	0	0	0	0	0.181179	0.618326
GATCTGATTTTCTCCAA	s	Th	1	ADAMTS6	11174	ADAM metallopeptidase with thrombospondin type 1 motif, 6	0	0.9	0	5	1	5.55556	0.147326	0.686951
GATCCTCTCACCATTTT	s	T	1	ADAMTS9	56999	ADAM metallopeptidase with thrombospondin type 1 motif, 9	0	0.9	0	63	13	70	1.29653e-05	0.0388462
GATCCTGTGTTTGTGGC	s	T	1	ADAMTSL2	9719	ADAMTS-like 2	8	8	9	17	17	2.125	0.386033	0.746681
GATCGCACATCCCTGCG	s	Th	1	ADAR	103	Adenosine deaminase, RNA-specific	158	158	1	272	22	1.72152	0.0023102	0.158406
GATCACACTGCACTCCA	s	Th	5	ADAR	103	Adenosine deaminase, RNA-specific	9	9	3	0	0	0	0.0909465	0.433224
GATCTTATCTAGCAAGC	s	Th	5	ADAR	103	Adenosine deaminase, RNA-specific	11	11	11	0	0	0	0.0509456	0.433224
GATCAAGGAGAAAATCT	s	Th	3	ADAR	103	Adenosine deaminase, RNA-specific	0	0.9	0	8	8	8.88889	0.0759457	0.636774
GATCTGAGGATGGGATT	s	Th	1	ADARB1	104	Adenosine deaminase, RNA-specific, B1 (RED1 homolog rat)	42	42	9	0	0	0	0.000260508	0.0620318
GATCACAGACACCCTGT	s	Th	1	ADC	113451	Arginine decarboxylase	41	41	5	48	9	1.17073	0.612271	0.856272
GATCAACCTCCATGAGC	s	Th	1	ADCK1	57143	AarF domain containing kinase 1	19	19	6	28	3	1.47368	0.384809	0.84191
GATCCTGCATCATGCCC	s	Th	1	ADCK2	90956	AarF domain containing kinase 2	62	62	4	39	43	0.629032	0.201592	0.669698
GATCAGACTCATCAGGG	s	Th	1	ADCK4	79934	AarF domain containing kinase 4	20	20	2	8	9	0.4	0.234694	0.657827
GATCCATTGAGGTCAGG	s	Th	4	ADCY1	107	Adenylate cyclase 1 (brain)	62	62	20	0	0	0	1.27385e-05	0.0343782
GATCGTTCTGCCACTTG	s	Th	1	ADCY2	108	Adenylate cyclase 2 (brain)	187	187	19	21	0	0.112299	3.44258e-10	0.0343782
GATCAAGACCATCGGCA	s	Th	1	ADCY4	196883	Adenylate cyclase 4	8	8	8	0	0	0	0.0909465	0.618326
GATCTTCACCTCCAACA	s	T	2	ADCY5	111	Adenylate cyclase 5	45	45	20	0	0	0	0.000403622	0.0602665
GATCGGGCTCAACATCG	s	Th	1	ADCY5	111	Adenylate cyclase 5	16	16	4	5	5	0.3125	0.284682	0.673901
GATCGCCAAGATGAACC	s	Th	4	ADCY5	111	Adenylate cyclase 5	5	5	5	0	0	0	0.167517	0.678357
GATCCCCGTACCACAGT	s	T	1	ADCY6	112	Adenylate cyclase 6	68	68	4	206	3	3.02941	7.22096e-06	0.0343782
GATCTATGTGAAGGGTA	s	Th	1	ADCY8	114	Adenylate cyclase 8 (brain)	6	6	3	0	0	0	0.167517	0.678357
GATCCGGAGAGCCGAAG	s	T	1	ADCY9	115	Adenylate cyclase 9	33	33	1	80	33	2.42424	0.0146086	0.228305
GATCCCCTCCACCTGCA	s	Th	5	ADCYAP1R1	117	Adenylate cyclase activating polypeptide 1 (pituitary) receptor type I	25	25	2	0	0	0	0.00577204	0.161136
GATCCAAGGAGCAGCCC	s	T	5	ADCYAP1R1	117	Adenylate cyclase activating polypeptide 1 (pituitary) receptor type I	0	0.9	0	24	2	26.6667	0.0051375	0.169253
GATCTGGGACATTTTGG	s	Th	1	ADCYAP1R1	117	Adenylate cyclase activating polypeptide 1 (pituitary) receptor type I	12	12	6	0	0	0	0.0509456	0.399179
GATCCCACTGATTGGCC	s	Th	1	ADD1	118	Adducin 1 (alpha)	531	531	40	343	15	0.645951	0.000434731	0.0604984
GATCCTGGGCATGATGG	s	Th	5	ADD1	118	Adducin 1 (alpha)	0	0.9	0	21	23	23.3333	0.00670973	0.22588
GATCACGTGAAACCCTT	s	Th	3	ADD1	118	Adducin 1 (alpha)	5	5	5	0	0	0	0.167517	0.678357
GATCTGTCCCCTGATGA	s	T	3	ADD1	118	Adducin 1 (alpha)	5	5	5	0	0	0	0.181179	0.678357
GATCTCACTAACTACTG	s	Th	1	ADD3	120	Adducin 3 (gamma)	39	39	12	10	1	0.25641	0.0162413	0.228133
GATCCAAATCAGTTTGT	s	Th	4	ADD3	120	Adducin 3 (gamma)	5	5	2	0	0	0	0.167517	0.678357
GATCAGATTGGGGGATG	s	Th	3	ADD3	120	Adducin 3 (gamma)	287	287	16	308	34	1.07317	0.632232	0.860018
GATCTGAAAAGGCGTCT	s	Th	1	ADFP	123	Adipose differentiation-related protein	0	0.9	0	62	8	68.8889	7.965e-06	0.0388462
GATCACATTGCCATTCC	s	Th	1	ADH5	128	Alcohol dehydrogenase 5 (class III), chi polypeptide	23	23	1	59	15	2.56522	0.0369923	0.385664
GATCATTGGTGTGGACA	s	T	1	ADH5	128	Alcohol dehydrogenase 5 (class III), chi polypeptide	5	5	2	0	0	0	0.181179	0.678357
GATCCAGACATCTCAAG	s	T	1	ADHFE1	137872	Alcohol dehydrogenase, iron containing, 1	15	15	4	4	4	0.266667	0.13408	0.673901
GATCCATCCTCCCACCT	s	T	1	ADHFE1	137872	Alcohol dehydrogenase, iron containing, 1	297	297	7	362	53	1.21886	0.1759	0.688171
GATCTAGAAAGCAACTT	s	T	1	ADI1	55256	Acireductone dioxygenase 1	8	8	8	0	0	0	0.101495	0.618326
GATCTGTGGTGGCACAG	s	T	4	ADIPOR1	51094	Adiponectin receptor 1	0	0.9	0	6	6	6.66667	0.134721	0.686951
GATCATAGAAGGTTGGG	s	T	1	ADIPOR2	79602	Adiponectin receptor 2	53	53	1	89	13	1.67925	0.104885	0.617753
GATCAAGACCAGAAAGA	s	Th	1	ADK	132	Adenosine kinase	0	0.9	0	15	9	16.6667	0.021955	0.383968
GATCAGCCCCCAGGGCT	s	Th	2	ADM	133	Adrenomedullin	0	0.9	0	138	4	153.333	3.14158e-11	0.0343782
GATCTCAGTCTCCATGG	s	Th	1	ADNP2	22850	ADNP homeobox 2	30	30	1	15	4	0.5	0.231245	0.671983
GATCCTGGAGCCCCTGT	s	T	1	ADORA1	134	Adenosine A1 receptor	38	38	0	85	2	2.23684	0.0282293	0.238111
GATCCTCAAAGCCTGTG	s	T	1	ADORA3	140	Adenosine A3 receptor	17	17	3	20	10	1.17647	0.625567	0.860917
GATCCATTCCAAGAACT	s	Th	4	ADRA1B	147	Adrenergic, alpha-1B-, receptor	0	0.9	0	5	1	5.55556	0.147326	0.686951
GATCAGGGCAGCTGCTC	s	Th	4	ADRA1D	146	Adrenergic, alpha-1D-, receptor	23	23	2	0	0	0	0.00577204	0.173524
GATCCAGGATAACCTCA	s	T	1	ADRB2	154	Adrenergic, beta-2-, receptor, surface	0	0.9	0	30	1	33.3333	0.00277623	0.127163
GATCCGACTTGAATTTT	s	T	3	ADRBK1	156	Adrenergic, beta, receptor kinase 1	131	131	4	30	3	0.229008	2.25945e-05	0.0343782
GATCCGCGGTGGGAAAC	s	T	4	ADRBK1	156	Adrenergic, beta, receptor kinase 1	30	30	9	0	0	0	0.00456115	0.121827
GATCTATTCGCTACCGG	s	T	1	ADRBK2	157	Adrenergic, beta, receptor kinase 2	25	25	11	0	0	0	0.00748908	0.161136
GATCTTCTGGTCTGTGC	s	Th	2	ADRBK2	157	Adrenergic, beta, receptor kinase 2	8	8	8	0	0	0	0.0909465	0.618326
GATCCAGAATACCCTGA	s	T	1	ADRM1	11047	Adhesion regulating molecule 1	193	193	6	212	25	1.09845	0.611445	0.858449
GATCCCTCCTTCCCAGC	s	Th	5	ADRM1	11047	Adhesion regulating molecule 1	6	6	3	5	1	0.833333	0.961189	0.883973
GATCTGTTTGGCCGAGG	s	Th	1	ADSL	158	Adenylosuccinate lyase	3	3	3	31	3	10.3333	0.00518808	0.175846
GATCCTTCTTCTTTCAC	s	T	1	ADSL	158	Adenylosuccinate lyase	38	38	7	15	3	0.394737	0.0752627	0.43323
GATCAATGGATTTACTG	s	Th	4	ADSS	159	Adenylosuccinate synthase	12	12	0	0	0	0	0.0509456	0.399179
GATCCCAACAGGCCCTG	s	Th	1	ADSSL1	122622	Adenylosuccinate synthase like 1	31	31	7	20	5	0.645161	0.366534	0.793096
GATCAGCGTCCTACCAA	s	T	1	AEBP1	165	AE binding protein 1	25	25	6	59	1	2.36	0.0560921	0.40947
GATCTCTACAGAGAGAA	s	Th	1	AES	166	Amino-terminal enhancer of split	161	161	15	0	0	0	1.96199e-12	0.0343782
GATCGTCAAAAGGCTGA	s	T	3	AES	166	Amino-terminal enhancer of split	505	505	30	722	41	1.4297	0.000786313	0.11936
GATCATAAGTCTTAGGA	s	T	1	AFAP1	60312	Actin filament associated protein 1	22	22	1	0	0	0	0.0123649	0.173524
GATCAGTCATCATTCTT	s	Th	5	AFF2	2334	AF4/FMR2 family, member 2	27	27	1	0	0	0	0.00341255	0.129606
GATCAGACTCATGTGCA	s	Th	1	AFF3	3899	AF4/FMR2 family, member 3	5	5	5	21	0	4.2	0.0818301	0.60678
GATCACTTGTTGCTGTC	s	Th	1	AFG3L2	10939	AFG3 ATPase family gene 3-like 2 (yeast)	16	16	1	0	0	0	0.0290848	0.372717
GATCTGTGCAAGCTCAG	s	Th	2	AFP	174	Alpha-fetoprotein	22	22	2	20	2	0.909091	0.849537	0.860123
GATCGCTGGCCTTCCTG	s	T	2	AFTPH	54812	Aftiphilin	12	12	1	0	0	0	0.0586249	0.399179
GATCATTGTCAGAACTT	s	T	1	AFTPH	54812	Aftiphilin	7	7	7	0	0	0	0.181179	0.618326
GATCCAACCATAGCTTG	s	T	1	AGA	175	Aspartylglucosaminidase	0	0.9	0	6	6	6.66667	0.134721	0.686951
GATCCCCGGGCCCAAAC	s	T	1	AGBL5	60509	ATP/GTP binding protein-like 5	7	7	6	56	9	8	0.000701129	0.0943182
GATCCTGCTCTGCTACA	s	Th	1	AGBL5	60509	ATP/GTP binding protein-like 5	3	3	0	8	9	2.66667	0.294196	0.792038
GATCCAGCTTCAGCTTC	s	T	1	AGGF1	55109	Angiogenic factor with G patch and FHA domains 1	45	45	13	182	26	4.04444	1.16437e-06	0.0343782
GATCTAAAGTCTCAGGG	s	T	3	AGGF1	55109	Angiogenic factor with G patch and FHA domains 1	5	5	5	13	2	2.6	0.339505	0.772929
GATCCTAGGAAGAGAGA	s	Th	2	AGK	55750	Acylglycerol kinase	22	22	2	13	9	0.590909	0.409875	0.762611
GATCCCCTTGGAAAGGA	s	T	1	AGL	178	Amylo-1, 6-glucosidase, 4-alpha-glucanotransferase (glycogen debranching enzyme, glycogen storage disease type III)	3	3	3	4	4	1.33333	0.93679	0.848303
GATCTGCTTGGGATGAT	s	T	1	AGPAT1	10554	1-acylglycerol-3-phosphate O-acyltransferase 1 (lysophosphatidic acid acyltransferase, alpha)	274	274	16	82	2	0.29927	7.13183e-08	0.0343782
GATCCGAGTGGAGGTGC	s	T	4	AGPAT1	10554	1-acylglycerol-3-phosphate O-acyltransferase 1 (lysophosphatidic acid acyltransferase, alpha)	13	13	13	0	0	0	0.0586249	0.399179
GATCGCCAAGCGGGAGC	s	Th	3	AGPAT2	10555	1-acylglycerol-3-phosphate O-acyltransferase 2 (lysophosphatidic acid acyltransferase, beta)	14	14	4	0	0	0	0.0290848	0.372717
GATCTATCCCGAGGGTA	s	Th	2	AGPAT2	10555	1-acylglycerol-3-phosphate O-acyltransferase 2 (lysophosphatidic acid acyltransferase, beta)	9	9	3	0	0	0	0.0909465	0.433224
GATCATTTGGGGTCAGG	s	Th	5	AGPAT3	56894	1-acylglycerol-3-phosphate O-acyltransferase 3	0	0.9	0	95	6	105.556	3.4391e-08	0.0343782
GATCGCCAGCAAGTACT	s	Th	1	AGPAT3	56894	1-acylglycerol-3-phosphate O-acyltransferase 3	31	31	10	5	5	0.16129	0.026026	0.229374
GATCTTTGAGGAAACAG	s	T	1	AGPAT4	56895	1-acylglycerol-3-phosphate O-acyltransferase 4 (lysophosphatidic acid acyltransferase, delta)	0	0.9	0	6	5	6.66667	0.134721	0.686951
GATCTGGCTAACTCTTA	s	Th	5	AGPAT5	55326	1-acylglycerol-3-phosphate O-acyltransferase 5 (lysophosphatidic acid acyltransferase, epsilon)	5	5	1	0	0	0	0.167517	0.678357
GATCAGTTTTTCCATCC	s	T	1	AGPAT5	55326	1-acylglycerol-3-phosphate O-acyltransferase 5 (lysophosphatidic acid acyltransferase, epsilon)	13	13	4	6	6	0.461538	0.496236	0.753392
GATCCCTGTGCACCCGG	s	T	1	AGPAT6	137964	1-acylglycerol-3-phosphate O-acyltransferase 6 (lysophosphatidic acid acyltransferase, zeta)	70	70	29	141	3	2.01429	0.00810756	0.210866
GATCCAGCCAAGGCCTC	s	T	1	AGPAT7	254531	1-acylglycerol-3-phosphate O-acyltransferase 7 (lysophosphatidic acid acyltransferase, eta)	241	241	9	87	30	0.360996	9.38347e-06	0.0343782
GATCCTCAGACGGTGGC	s	T	4	AGPAT7	254531	1-acylglycerol-3-phosphate O-acyltransferase 7 (lysophosphatidic acid acyltransferase, eta)	13	13	4	0	0	0	0.0586249	0.399179
GATCTGGGTGTCCTGAC	s	Th	1	AGRN	375790	Agrin	100	100	3	423	23	4.23	1.77636e-15	0.0343782
GATCAGGGAAAATACAA	s	T	1	AGTPBP1	23287	ATP/GTP binding protein 1	0	0.9	0	4	4	4.44444	0.290216	0.686951
GATCCCTTTGCAGTCCC	s	T	1	AGTRAP	57085	Angiotensin II receptor-associated protein	48	48	16	50	8	1.04167	0.907653	0.862748
GATCCCTCCCCAAAGCA	s	T	5	AGTRL1	187	Angiotensin II receptor-like 1	0	0.9	0	6	6	6.66667	0.134721	0.686951
GATCACTTCCCTGTCAT	s	Th	5	AGTRL1	187	Angiotensin II receptor-like 1	20	20	2	36	7	1.8	0.295409	0.749119
GATCCTGTTAGTCACTG	s	T	1	AGTRL1	187	Angiotensin II receptor-like 1	50	50	2	61	8	1.22	0.502	0.851393
GATCACTCTTGACCATG	s	Th	1	AGXT2L1	64850	Alanine-glyoxylate aminotransferase 2-like 1	44	44	2	0	0	0	0.000260508	0.0602665
GATCACTTAGTTTTTGG	s	T	1	AHCY	191	S-adenosylhomocysteine hydrolase	0	0.9	0	41	3	45.5556	0.000451822	0.0725022
GATCACTACCGCTACTG	s	Th	1	AHCY	191	S-adenosylhomocysteine hydrolase	0	0.9	0	7	7	7.77778	0.147326	0.636774
GATCCCATATCTATTAC	s	Th	1	AHCYL1	10768	S-adenosylhomocysteine hydrolase-like 1	14	14	2	0	0	0	0.0290848	0.372717
GATCCCTCCCAGCGTCC	s	Th	3	AHDC1	27245	AT hook, DNA binding motif, containing 1	95	95	14	18	6	0.189474	7.39501e-05	0.0406889
GATCATATGAGGTCGGG	s	T	5	AHI1	54806	Abelson helper integration site 1	0	0.9	0	26	1	28.8889	0.0051375	0.169253
GATCTGTTCAAACAGCA	s	T	1	AHNAK	79026	AHNAK nucleoprotein	7	7	0	0	0	0	0.181179	0.618326
GATCGGGCCTGTGGGCA	s	Th	1	AHNAK2	113146	AHNAK nucleoprotein 2	95	95	11	0	0	0	5.52087e-08	0.0343782
GATCTGGTCCCTGAGAA	s	Th	1	AHSA1	10598	AHA1, activator of heat shock 90kDa protein ATPase homolog 1 (yeast)	102	102	17	46	13	0.45098	0.00917276	0.170127
GATCAACAGCTCCGCCT	s	T	1	AIFM2	84883	Apoptosis-inducing factor, mitochondrion-associated, 2	8	8	8	0	0	0	0.101495	0.618326
GATCTTCCAATCCAGAG	s	T	1	AIFM2	84883	Apoptosis-inducing factor, mitochondrion-associated, 2	17	17	3	19	7	1.11765	0.859247	0.860917
GATCTGGAGGAGCTGAA	s	Th	4	AIFM3	150209	Apoptosis-inducing factor, mitochondrion-associated, 3	31	31	4	0	0	0	0.0020268	0.121827
GATCCAGAAGATGCTCA	s	Th	1	AIFM3	150209	Apoptosis-inducing factor, mitochondrion-associated, 3	30	30	6	7	6	0.233333	0.026026	0.388258
GATCCAAGTCTAAACGC	s	Th	1	AIG1	51390	Androgen-induced 1	41	41	1	0	0	0	0.000433378	0.0699457
GATCCTGAATGGCCTGA	s	Th	1	AIG1	51390	Androgen-induced 1	11	11	2	0	0	0	0.0509456	0.433224
GATCTGAAAGTCTTGTG	s	Th	5	AIG1	51390	Androgen-induced 1	5	5	2	0	0	0	0.167517	0.678357
GATCTTCTCCCATTGAC	s	T	3	AIP	9049	Aryl hydrocarbon receptor interacting protein	95	95	1	58	19	0.610526	0.117617	0.433187
GATCAAGAAGGGGACAG	s	Th	3	AIRE	326	Autoimmune regulator	8	8	1	0	0	0	0.0909465	0.618326
GATCGGCATCTTATTCC	s	Th	4	AJAP1	55966	Adherens junction associated protein 1	12	12	12	0	0	0	0.0509456	0.399179
GATCGTGCAGAAGTATG	s	Th	2	AK1	203	Adenylate kinase 1	128	128	20	92	19	0.71875	0.172741	0.650594
GATCTGTTTGTTCCCTG	s	Th	1	AK2	204	Adenylate kinase 2	11	11	5	102	11	9.27273	2.48912e-06	0.0343782
GATCCACTCCGCCATCG	s	Th	1	AK2	204	Adenylate kinase 2	9	9	3	123	24	13.6667	1.87445e-08	0.0343782
GATCACTCAACAGCACT	s	Th	1	AK2	204	Adenylate kinase 2	19	19	1	16	5	0.842105	0.825165	0.845484
GATCGCCTACTACGAGA	s	Th	1	AK5	26289	Adenylate kinase 5	50	50	5	0	0	0	9.46885e-05	0.0503822
GATCCATTTCTGGGATA	s	Th	1	AK5	26289	Adenylate kinase 5	23	23	7	0	0	0	0.00577204	0.173524
GATCATCTGGTTCTCCT	s	Th	5	AK5	26289	Adenylate kinase 5	16	16	1	3	4	0.1875	0.115514	0.60077
GATCTGGGAACTTTTTG	s	T	1	AKAP1	8165	A kinase (PRKA) anchor protein 1	43	43	12	0	0	0	0.000651958	0.0620318
GATCTTTCTTCTCCCAG	s	T	1	AKAP11	11215	A kinase (PRKA) anchor protein 11	133	133	5	20	1	0.150376	3.47511e-06	0.0343782
GATCCCCACGCCTCCCC	s	T	2	AKAP13	11214	A kinase (PRKA) anchor protein 13	0	0.9	0	59	1	65.5556	2.33168e-05	0.0406889
GATCCGCAGGAGGGTGG	s	T	1	AKAP13	11214	A kinase (PRKA) anchor protein 13	38	38	3	130	16	3.42105	0.000180619	0.0512997
GATCCCATCGTTCTTCC	s	Th	3	AKAP13	11214	A kinase (PRKA) anchor protein 13	5	5	5	34	11	6.8	0.00974807	0.209474
GATCGTCTTTGAAGTTC	s	Th	4	AKAP6	9472	A kinase (PRKA) anchor protein 6	39	39	3	2	2	0.0512821	0.00182664	0.0967745
GATCACACCAACTCTGC	s	Th	5	AKAP6	9472	A kinase (PRKA) anchor protein 6	25	25	4	0	0	0	0.00577204	0.161136
GATCCATTCCAACCTGA	s	Th	2	AKAP6	9472	A kinase (PRKA) anchor protein 6	16	16	4	36	4	2.25	0.11009	0.623084
GATCCAAACTTTGCCTG	s	Th	4	AKAP6	9472	A kinase (PRKA) anchor protein 6	0	0.9	0	5	5	5.55556	0.147326	0.686951
GATCCTCAAGCCGAACA	s	T	1	AKAP8	10270	A kinase (PRKA) anchor protein 8	15	15	1	2	2	0.133333	0.13408	0.60077
GATCCGCGGCATCCCGG	s	T	1	AKAP8L	26993	A kinase (PRKA) anchor protein 8-like	110	110	6	162	58	1.47273	0.0805113	0.615905
GATCATCTGAGCAAAGA	s	T	5	AKAP9	10142	A kinase (PRKA) anchor protein (yotiao) 9	27	27	8	0	0	0	0.00748908	0.129606
GATCCTGACAGAGCCCT	s	T	1	AKAP9	10142	A kinase (PRKA) anchor protein (yotiao) 9	50	50	5	11	3	0.22	0.00945922	0.130373
GATCAGACTGGGGTCAG	s	Th	4	AKAP9	10142	A kinase (PRKA) anchor protein (yotiao) 9	5	5	1	0	0	0	0.167517	0.678357
GATCCCAGCCAATGCCA	s	Th	1	AKR1A1	10327	Aldo-keto reductase family 1, member A1 (aldehyde reductase)	0	0.9	0	41	8	45.5556	0.000220483	0.0725022
GATCCTGATGAGCCTGT	s	Th	1	AKR1A1	10327	Aldo-keto reductase family 1, member A1 (aldehyde reductase)	17	17	18	0	0	0	0.0168196	0.231134
GATCTCAAGAGCCCTGT	s	Th	1	AKR1B1	231	Aldo-keto reductase family 1, member B1 (aldose reductase)	81	81	3	112	8	1.38272	0.22185	0.689165
GATCCCACCGAGAAGAA	s	Th	1	AKR1C2	1646	Aldo-keto reductase family 1, member C2 (dihydrodiol dehydrogenase 2; bile acid binding protein; 3-alpha hydroxysteroid dehydrogenase, type III)	8	8	1	49	1	6.125	0.00336223	0.123317
GATCTCTGAGGAGAAGC	s	Th	5	AKR1C3	8644	Aldo-keto reductase family 1, member C3 (3-alpha hydroxysteroid dehydrogenase, type II)	6	6	6	0	0	0	0.167517	0.678357
GATCCTGCCCACTGTGT	s	T	1	AKR7A3	22977	Aldo-keto reductase family 7, member A3 (aflatoxin aldehyde reductase)	3	3	0	43	3	14.3333	0.00112264	0.0961818
GATCTCTCCACGGTAGC	s	Th	1	AKT1	207	V-akt murine thymoma viral oncogene homolog 1	102	102	11	261	14	2.55882	2.84747e-06	0.0343782
GATCGGCAGTTGGGAGG	s	Th	1	AKT1S1	84335	AKT1 substrate 1 (proline-rich)	131	131	30	112	9	0.854962	0.480271	0.811063
GATCCATGAGCTGCCCT	s	T	1	AKT2	208	V-akt murine thymoma viral oncogene homolog 2	3	3	3	43	5	14.3333	0.00112264	0.0961818
GATCCACTGTGGAGTGT	s	T	5	AKT2	208	V-akt murine thymoma viral oncogene homolog 2	5	5	5	0	0	0	0.181179	0.678357
GATCCAATTTACAGAAA	s	T	1	AKT2	208	V-akt murine thymoma viral oncogene homolog 2	0	0.9	0	6	6	6.66667	0.134721	0.686951
GATCTAGTCATCTGGTT	s	T	1	AKT3	10000	V-akt murine thymoma viral oncogene homolog 3 (protein kinase B, gamma)	5	5	5	0	0	0	0.181179	0.678357
GATCATTTGAATCTCAG	s	Th	1	AKTIP	64400	AKT interacting protein	58	58	4	0	0	0	2.0994e-05	0.0388462
GATCCCACCTCAGGTGA	s	Th	3	AKTIP	64400	AKT interacting protein	5	5	5	8	8	1.6	0.615841	0.85689
GATCCTGAAGAGCGCTG	s	T	1	ALAS1	211	Aminolevulinate, delta-, synthase 1	115	115	10	85	2	0.73913	0.249674	0.673051
GATCAGCCCAGGGTTCC	s	Th	1	ALDH16A1	126133	Aldehyde dehydrogenase 16 family, member A1	8	8	8	26	5	3.25	0.112125	0.60411
GATCTAGGAGAGGCGGC	s	T	1	ALDH1L1	10840	Aldehyde dehydrogenase 1 family, member L1	18	18	2	0	0	0	0.0205587	0.231134
GATCCTTGCGTGCTGAA	s	T	1	ALDH2	217	Aldehyde dehydrogenase 2 family (mitochondrial)	149	149	3	67	13	0.449664	0.00305571	0.119492
GATCCCCTGAGCAAGTC	s	T	4	ALDH3A2	224	Aldehyde dehydrogenase 3 family, member A2	10	10	7	173	31	17.3	3.39466e-11	0.0343782
GATCACTGCCTGGGCAG	s	Th	1	ALDH5A1	7915	Aldehyde dehydrogenase 5 family, member A1 (succinate-semialdehyde dehydrogenase)	36	36	7	0	0	0	0.000722659	0.0929818
GATCTGGAGAGTGGCAG	s	T	1	ALDH5A1	7915	Aldehyde dehydrogenase 5 family, member A1 (succinate-semialdehyde dehydrogenase)	0	0.9	0	26	1	28.8889	0.0051375	0.169253
GATCGATGGGATTGGAA	s	Th	3	ALDH6A1	4329	Aldehyde dehydrogenase 6 family, member A1	8	8	8	0	0	0	0.0909465	0.618326
GATCAGACTGTGGCATT	s	Th	1	ALDH7A1	501	Aldehyde dehydrogenase 7 family, member A1	100	100	0	8	9	0.08	1.94278e-06	0.0343782
GATCCATTCCTACGGTC	s	T	1	ALDH8A1	64577	Aldehyde dehydrogenase 8 family, member A1	10	10	10	0	0	0	0.101495	0.433224
GATCACAACCAGTTTGT	s	Th	1	ALDH9A1	223	Aldehyde dehydrogenase 9 family, member A1	34	34	11	16	5	0.470588	0.160575	0.606891
GATCACCTTCCTGTCTG	s	T	1	ALDOA	226	Aldolase A, fructose-bisphosphate	3319	3319	59	2150	143	0.647785	0	0.0343782
GATCCTCCCTGATGGGG	s	T	1	ALDOA	226	Aldolase A, fructose-bisphosphate	23	23	2	82	2	3.56522	0.00198915	0.0992481
GATCAGAGGGTAGTACA	s	Th	1	ALDOC	230	Aldolase C, fructose-bisphosphate	317	317	16	207	6	0.652997	0.00643276	0.158525
GATCAGAACCCGAGCTG	s	Th	1	ALDOC	230	Aldolase C, fructose-bisphosphate	6	6	3	3	0	0.5	0.592387	0.844415
GATCCTGCGGGCAAGCT	s	T	3	ALG1	56052	Asparagine-linked glycosylation 1 homolog (S. cerevisiae, beta-1,4-mannosyltransferase)	18	18	8	180	24	10	4.88498e-10	0.0343782
GATCCTTTACTGACTCC	s	Th	3	ALG11	440138	Asparagine-linked glycosylation 11 homolog (S. cerevisiae, alpha-1,2-mannosyltransferase)	6	6	0	0	0	0	0.167517	0.678357
GATCCTACCTCCAGGCG	s	Th	5	ALG12	79087	Asparagine-linked glycosylation 12 homolog (S. cerevisiae, alpha-1,6-mannosyltransferase)	0	0.9	0	36	14	40	0.000678084	0.096944
GATCCATAGCGAGAGTG	s	T	1	ALG2	85365	Asparagine-linked glycosylation 2 homolog (S. cerevisiae, alpha-1,3-mannosyltransferase)	0	0.9	0	20	1	22.2222	0.00957784	0.22588
GATCGTTTCTACCCTCT	s	Th	1	ALG3	10195	Asparagine-linked glycosylation 3 homolog (S. cerevisiae, alpha-1,3-mannosyltransferase)	0	0.9	0	16	1	17.7778	0.021955	0.383968
GATCCCTCCAAAAGGAA	s	T	4	ALG3	10195	Asparagine-linked glycosylation 3 homolog (S. cerevisiae, alpha-1,3-mannosyltransferase)	7	7	0	0	0	0	0.181179	0.618326
GATCCTCCTCAGAAACT	s	T	1	ALG6	29929	Asparagine-linked glycosylation 6 homolog (S. cerevisiae, alpha-1,3-glucosyltransferase)	8	8	9	0	0	0	0.101495	0.618326
GATCTTCTCTTCCACCT	s	T	1	ALKBH1	8846	AlkB, alkylation repair homolog 1 (E. coli)	2	2	2	19	3	9.5	0.0762406	0.3963
GATCACGTCTCTGGGGT	s	Th	1	ALKBH2	121642	AlkB, alkylation repair homolog 2 (E. coli)	16	16	4	26	24	1.625	0.357556	0.793728
GATCTCATGATGTGGCT	s	Th	1	ALKBH3	221120	AlkB, alkylation repair homolog 3 (E. coli)	5	5	5	2	2	0.4	0.592387	0.844415
GATCCTGGAGATGGACA	s	T	3	ALKBH5	54890	AlkB, alkylation repair homolog 5 (E. coli)	30	30	5	0	0	0	0.00456115	0.121827
GATCTGCTGCCCCATGG	s	T	4	ALKBH6	84964	AlkB, alkylation repair homolog 6 (E. coli)	18	18	2	0	0	0	0.0205587	0.231134
GATCTGACCCTCCCAGT	s	Th	1	ALPL	249	Alkaline phosphatase, liver/bone/kidney	28	28	12	10	9	0.357143	0.0992921	0.605651
GATCCGTGAACTGCAGG	s	T	1	ALS2CL	259173	ALS2 C-terminal like	0	0.9	0	17	6	18.8889	0.0180309	0.238835
GATCATGACTGAGTCTA	s	T	1	ALS2CR13	150864	Amyotrophic lateral sclerosis 2 (juvenile) chromosome region, candidate 13	25	25	1	4	0	0.16	0.0300988	0.389819
GATCTGCTCGTCTTGGC	s	Th	5	ALS2CR13	150864	Amyotrophic lateral sclerosis 2 (juvenile) chromosome region, candidate 13	0	0.9	0	8	1	8.88889	0.0759457	0.636774
GATCCTTTCATAGGAGA	s	T	4	AMACR	23600	Alpha-methylacyl-CoA racemase	7	7	4	0	0	0	0.181179	0.618326
GATCAGGAAAGTTGTAG	s	Th	1	AMD1	262	Adenosylmethionine decarboxylase 1	5	5	5	0	0	0	0.167517	0.678357
GATCAGGAGGAAGTGAG	s	Th	1	AMFR	267	Autocrine motility factor receptor	52	52	19	131	6	2.51923	0.00123299	0.121888
GATCCGCGCGGGCCGGG	s	Th	1	AMH	268	Anti-Mullerian hormone	0	0.9	0	172	35	191.111	8.74856e-14	0.0343782
GATCTATGGTGTTGGAT	s	T	1	AMN1	196394	Antagonist of mitotic exit network 1 homolog (S. cerevisiae)	17	17	4	0	0	0	0.0344982	0.231134
GATCTGTGGTGTTGGAT	s	T	1	AMN1	196394	Antagonist of mitotic exit network 1 homolog (S. cerevisiae)	0	0.9	0	9	9	10	0.0669655	0.594545
GATCTCGGCTGCCTTTT	s	Th	2	AMOTL2	51421	Angiomotin like 2	53	53	11	36	34	0.679245	0.314654	0.740627
GATCCCAGCTGGCCCCT	s	Th	1	AMPD2	271	Adenosine monophosphate deaminase 2 (isoform L)	323	323	60	297	15	0.919505	0.554147	0.806392
GATCTATGTGTATGCAG	s	Th	1	AMPH	273	Amphiphysin	61	61	1	0	0	0	1.27385e-05	0.0388462
GATCAGGATGCAGGCTG	s	Th	4	AMPH	273	Amphiphysin	11	11	11	0	0	0	0.0509456	0.433224
GATCTTTGCTCCTGGTA	s	T	1	AMT	275	Aminomethyltransferase	18	18	6	2	2	0.111111	0.0810829	0.416223
GATCCCACTGACCTACT	s	Th	4	AMT	275	Aminomethyltransferase	9	9	3	0	0	0	0.0909465	0.433224
GATCTTTGCCCCTGGTA	s	T	1	AMT	275	Aminomethyltransferase	5	5	2	0	0	0	0.181179	0.678357
GATCTTGTGCTGTGTCA	s	Th	1	AMZ2	51321	Archaemetzincins-2	112	112	4	0	0	0	4.75797e-09	0.0343782
GATCCGAAGAACAAGGC	s	T	4	AMZ2	51321	Archaemetzincins-2	8	8	2	0	0	0	0.101495	0.618326
GATCAAAGCTGCAGTGA	s	Th	5	ANAPC13	25847	Anaphase promoting complex subunit 13	0	0.9	0	21	3	23.3333	0.00670973	0.22588
GATCTTTGGCTAGGTGG	s	Th	1	ANAPC13	25847	Anaphase promoting complex subunit 13	69	69	1	44	2	0.637681	0.234921	0.678065
GATCCACCCTCCTCGCC	s	T	4	ANAPC2	29882	Anaphase promoting complex subunit 2	73	73	10	0	0	0	9.22164e-06	0.0343782
GATCAGTGTTTGCAAAA	s	Th	1	ANAPC4	29945	Anaphase promoting complex subunit 4	25	25	7	2	2	0.08	0.0237562	0.227767
GATCAGCCGAAGAAAGC	s	Th	1	ANAPC5	51433	Anaphase promoting complex subunit 5	109	109	27	343	8	3.14679	5.44311e-10	0.0343782
GATCAGAATGGAAGCCC	s	Th	3	ANAPC7	51434	Anaphase promoting complex subunit 7	0	0.9	0	28	1	31.1111	0.00211292	0.156764
GATCTGAGAAACAGGTG	s	Th	1	ANAPC7	51434	Anaphase promoting complex subunit 7	6	6	0	3	0	0.5	0.592387	0.844415
GATCCTGGGCCAGCCCC	s	T	1	ANGEL1	23357	Angel homolog 1 (Drosophila)	0	0.9	0	35	5	38.8889	0.000824106	0.096944
GATCAGGCCAAGTTTGG	s	Th	1	ANGEL2	90806	Angel homolog 2 (Drosophila)	6	6	0	0	0	0	0.167517	0.678357
GATCCAGAGAGTTCAAG	s	T	1	ANGEL2	90806	Angel homolog 2 (Drosophila)	32	32	13	45	1	1.40625	0.490126	0.816716
GATCATCTTGGAACTGC	s	Th	1	ANGPT2	285	Angiopoietin 2	0	0.9	0	23	2	25.5556	0.00670973	0.184749
GATCCGACCGAACCCCA	s	Th	1	ANGPTL2	23452	Angiopoietin-like 2	8	8	4	103	6	12.875	4.48537e-07	0.0343782
GATCATCAGAGCCCCCA	s	T	1	ANGPTL2	23452	Angiopoietin-like 2	95	95	22	106	14	1.11579	0.669313	0.85986
GATCCAGCCCATGGCAG	s	T	1	ANGPTL4	51129	Angiopoietin-like 4	7	7	0	0	0	0	0.181179	0.618326
GATCTGTCGGAACCAGG	s	Th	4	ANK1	286	Ankyrin 1, erythrocytic	2	2	2	16	5	8	0.0904397	0.606819
GATCTTTTCTTGACTCT	s	Th	2	ANK1	286	Ankyrin 1, erythrocytic	6	6	3	0	0	0	0.167517	0.678357
GATCTTGGACAAGTTGG	s	Th	1	ANK2	287	Ankyrin 2, neuronal	517	517	73	61	0	0.117988	0	0.0343782
GATCAGCCTTCCAGGAG	s	T	5	ANK3	288	Ankyrin 3, node of Ranvier (ankyrin G)	10	10	10	0	0	0	0.101495	0.433224
GATCCTTCCAAAGAACT	s	T	5	ANK3	288	Ankyrin 3, node of Ranvier (ankyrin G)	10	10	3	0	0	0	0.101495	0.433224
GATCAAATCACAGAGAA	s	Th	1	ANK3	288	Ankyrin 3, node of Ranvier (ankyrin G)	11	11	11	0	0	0	0.0509456	0.433224
GATCGAGTGAATGTGGC	s	Th	5	ANK3	288	Ankyrin 3, node of Ranvier (ankyrin G)	11	11	11	0	0	0	0.0509456	0.433224
GATCAGTGATTTCCAGG	s	Th	1	ANKDD1A	348094	Ankyrin repeat and death domain containing 1A	89	89	5	2	2	0.0224719	6.35367e-07	0.0343782
GATCCCCTGCCATCTTG	s	T	1	ANKDD1A	348094	Ankyrin repeat and death domain containing 1A	30	30	5	37	16	1.23333	0.635345	0.852055
GATCTGAGCAAGCTGTC	s	Th	1	ANKH	56172	Ankylosis, progressive homolog (mouse)	114	114	2	16	2	0.140351	1.74084e-06	0.0343782
GATCATCGTCCTCATCG	s	T	3	ANKH	56172	Ankylosis, progressive homolog (mouse)	8	8	9	0	0	0	0.101495	0.618326
GATCAGGACCTACTGCC	s	Th	2	ANKHD1	54882	Ankyrin repeat and KH domain containing 1	12	12	6	0	0	0	0.0509456	0.399179
GATCCTGACTCAGCTGG	s	T	3	ANKIB1	54467	Ankyrin repeat and IBR domain containing 1	86	86	3	262	4	3.04651	2.91859e-07	0.0343782
GATCCCTCAGCAGGAAC	s	Th	1	ANKMY2	57037	Ankyrin repeat and MYND domain containing 2	33	33	7	100	3	3.0303	0.00117558	0.0995298
GATCCCTCAGCAGGACC	s	Th	1	ANKMY2	57037	Ankyrin repeat and MYND domain containing 2	0	0.9	0	7	6	7.77778	0.147326	0.636774
GATCACTGCCTTGGGCT	s	Th	1	ANKRD10	55608	Ankyrin repeat domain 10	116	116	1	435	12	3.75	1.55431e-14	0.0343782
GATCGGGTGAGGAGCAG	s	Th	3	ANKRD11	29123	Ankyrin repeat domain 11	64	64	6	0	0	0	7.73758e-06	0.0343782
GATCCTGCCCTGCCAGC	s	T	1	ANKRD11	29123	Ankyrin repeat domain 11	78	78	9	63	6	0.807692	0.461796	0.797866
GATCGGTGGTTTTCTGA	s	Th	3	ANKRD11	29123	Ankyrin repeat domain 11	34	34	7	26	5	0.764706	0.560294	0.804111
GATCGCTGAAGGAAAAG	s	Th	5	ANKRD11	29123	Ankyrin repeat domain 11	12	12	4	7	7	0.583333	0.448963	0.827468
GATCATAGTCCAACATT	s	Th	1	ANKRD12	23253	Ankyrin repeat domain 12	0	0.9	0	36	19	40	0.000678084	0.096944
GATCTAGTGCAAGTTGG	s	T	2	ANKRD12	23253	Ankyrin repeat domain 12	23	23	6	0	0	0	0.0123649	0.173524
GATCCAGGACATACAAG	s	Th	1	ANKRD12	23253	Ankyrin repeat domain 12	19	19	1	0	0	0	0.0168196	0.216203
GATCCAGCTACCAATTT	s	T	3	ANKRD12	23253	Ankyrin repeat domain 12	0	0.9	0	9	5	10	0.0669655	0.594545
GATCACAATCTGTTGAC	s	Th	5	ANKRD12	23253	Ankyrin repeat domain 12	5	5	1	0	0	0	0.167517	0.678357
GATCCAAATAGAAGGGA	s	T	1	ANKRD13C	81573	Ankyrin repeat domain 13C	7	7	0	0	0	0	0.181179	0.618326
GATCCTGCAGCTGTCAC	s	T	1	ANKRD13D	338692	Ankyrin repeat domain 13 family, member D	166	166	10	74	2	0.445783	0.00179434	0.0729352
GATCCTGGTTCAGGCCT	s	T	3	ANKRD13D	338692	Ankyrin repeat domain 13 family, member D	23	23	9	0	0	0	0.0123649	0.173524
GATCATTGGTAACTTGG	s	T	1	ANKRD15	23189	Ankyrin repeat domain 15	55	55	14	128	36	2.32727	0.00367758	0.156694
GATCAGCCCTGCATCTG	s	Th	1	ANKRD16	54522	Ankyrin repeat domain 16	5	5	5	0	0	0	0.167517	0.678357
GATCCAGGAGCACATAC	s	T	1	ANKRD2	26287	Ankyrin repeat domain 2 (stretch responsive muscle)	7	7	0	0	0	0	0.181179	0.618326
GATCCAGCTCCAGGTCC	s	Th	3	ANKRD23	200539	Ankyrin repeat domain 23	2	2	2	28	9	14	0.00911982	0.218674
GATCCCTTCCTCCCAGG	s	Th	5	ANKRD23	200539	Ankyrin repeat domain 23	5	5	5	0	0	0	0.167517	0.678357
GATCCAAATCTTGCGGA	s	Th	4	ANKRD26	22852	Ankyrin repeat domain 26	0	0.9	0	49	1	54.4444	7.2386e-05	0.0512997
GATCCTTAAGCCAGAGG	s	T	3	ANKRD27	84079	Ankyrin repeat domain 27 (VPS9 domain)	33	33	8	37	7	1.12121	0.801978	0.860064
GATCCGCCTGCTGGGGG	s	T	5	ANKRD34A	284615	Ankyrin repeat domain 34A	0	0.9	0	4	4	4.44444	0.290216	0.686951
GATCAACTCAGGGAAAC	s	T	1	ANKRD42	338699	Ankyrin repeat domain 42	0	0.9	0	11	8	12.2222	0.0669655	0.594545
GATCTATCGTGGCCTGC	s	Th	5	ANKRD43	134548	Ankyrin repeat domain 43	36	36	16	0	0	0	0.000722659	0.0929818
GATCAGCTTGCAGAGTC	s	T	1	ANKRD46	157567	Ankyrin repeat domain 46	224	224	29	134	27	0.598214	0.0101363	0.161594
GATCCACCCACTCTCTG	s	T	1	ANKRD47	256949	Ankyrin repeat domain 47	17	17	1	2	2	0.117647	0.13408	0.416223
GATCTTAGAATGGGCCT	s	Th	4	ANKRD50	57182	Ankyrin repeat domain 50	11	11	11	0	0	0	0.0509456	0.433224
GATCAATTTGGACGCAC	s	Th	5	ANKRD50	57182	Ankyrin repeat domain 50	0	0.9	0	5	5	5.55556	0.147326	0.686951
GATCTTTCGCCAGGAAG	s	Th	1	ANKRD54	129138	Ankyrin repeat domain 54	12	12	4	0	0	0	0.0509456	0.399179
GATCAGTTACATTCATC	s	Th	1	ANKS1B	56899	Ankyrin repeat and sterile alpha motif domain containing 1B	50	50	2	0	0	0	9.46885e-05	0.0503822
GATCTTCTTCATGCCAG	s	T	3	ANKS1B	56899	Ankyrin repeat and sterile alpha motif domain containing 1B	5	5	5	0	0	0	0.181179	0.678357
GATCGACCCATCTGAGC	s	Th	3	ANKS1B	56899	Ankyrin repeat and sterile alpha motif domain containing 1B	48	48	16	31	1	0.645833	0.292339	0.713654
GATCAGGCCCCGGGAGC	s	Th	1	ANKS3	124401	Ankyrin repeat and sterile alpha motif domain containing 3	30	30	9	20	18	0.666667	0.366534	0.793096
GATCCTCCTTCCCGCAG	s	T	4	ANKS6	203286	Ankyrin repeat and sterile alpha motif domain containing 6	5	5	2	0	0	0	0.181179	0.678357
GATCCAGCGGGTAAAAA	s	T	1	ANKS6	203286	Ankyrin repeat and sterile alpha motif domain containing 6	48	48	7	35	36	0.729167	0.470785	0.793352
GATCTCTTACAGCTCTA	s	Th	1	ANKZF1	55139	Ankyrin repeat and zinc finger domain containing 1	19	19	1	0	0	0	0.0168196	0.216203
GATCCCTCAGGCCTTGA	s	Th	4	ANLN	54443	Anillin, actin binding protein	22	22	1	0	0	0	0.00981802	0.173524
GATCATTATTTTTGCTG	s	T	1	ANLN	54443	Anillin, actin binding protein	18	18	2	0	0	0	0.0205587	0.231134
GATCTCAGTTTCAAATC	s	Th	1	ANP32B	10541	Acidic (leucine-rich) nuclear phosphoprotein 32 family, member B	59	59	7	90	1	1.52542	0.138865	0.654281
GATCACCTTCCCTTCTT	s	T	1	ANP32E	81611	Acidic (leucine-rich) nuclear phosphoprotein 32 family, member E	7	7	6	9	2	1.28571	0.566434	0.859563
GATCTGTGGTGGCAATG	s	T	2	ANXA11	311	Annexin A11	151	151	16	56	16	0.370861	0.000403874	0.059695
GATCAGAATCATGGTCT	s	Th	1	ANXA2	302	Annexin A2	14	14	11	89	13	6.35714	5.62863e-05	0.0510659
GATCTCTTTGACTGCTG	s	Th	1	ANXA5	308	Annexin A5	42	42	12	146	13	3.47619	2.40012e-05	0.043986
GATCCTCATTTCTCTGG	s	T	4	ANXA6	309	Annexin A6	12	12	5	0	0	0	0.0586249	0.399179
GATCCTGTCCACCTCCA	s	Th	2	ANXA6	309	Annexin A6	12	12	4	5	5	0.416667	0.448963	0.753392
GATCCAAAAACATCCTG	s	T	1	ANXA6	309	Annexin A6	35	35	16	41	10	1.17143	0.792528	0.860332
GATCCTTGCCACAAGAA	s	Th	1	ANXA7	310	Annexin A7	137	137	11	56	1	0.408759	0.00108265	0.0929869
GATCAGCTGATGGAGCT	s	Th	1	AOF2	23028	Amine oxidase (flavin containing) domain 2	125	125	11	166	8	1.328	0.165852	0.713501
GATCCCTGGGGTAGGGC	s	Th	1	AP1B1	162	Adaptor-related protein complex 1, beta 1 subunit	72	72	1	69	5	0.958333	0.888491	0.858618
GATCATTGGAGAGAGAA	s	T	1	AP1G1	164	Adaptor-related protein complex 1, gamma 1 subunit	8	8	1	28	6	3.5	0.0898995	0.42682
GATCACAGTGCTGTGCA	s	Th	4	AP1G2	8906	Adaptor-related protein complex 1, gamma 2 subunit	0	0.9	0	7	6	7.77778	0.147326	0.636774
GATCAGGCCCCAAAGCC	s	Th	4	AP1M1	8907	Adaptor-related protein complex 1, mu 1 subunit	0	0.9	0	10	11	11.1111	0.0759457	0.594545
GATCCACATTCCCGTGC	s	Th	4	AP1M1	8907	Adaptor-related protein complex 1, mu 1 subunit	0	0.9	0	7	7	7.77778	0.147326	0.636774
GATCAGTATTGACCCAC	s	Th	1	AP1M1	8907	Adaptor-related protein complex 1, mu 1 subunit	95	95	23	120	24	1.26316	0.353144	0.79338
GATCCACCGATACGTGG	s	T	1	AP1S1	1174	Adaptor-related protein complex 1, sigma 1 subunit	209	209	15	171	7	0.818182	0.295791	0.687019
GATCTACTGCAGGAGGA	s	T	2	AP1S2	8905	Adaptor-related protein complex 1, sigma 2 subunit	95	95	5	15	3	0.157895	5.42217e-05	0.0388462
GATCATCCAGACTAAAG	s	T	1	AP2A1	160	Adaptor-related protein complex 2, alpha 1 subunit	91	91	15	0	0	0	5.64736e-07	0.0343782
GATCTGCGGGCACTTGT	s	T	1	AP2B1	163	Adaptor-related protein complex 2, beta 1 subunit	174	174	25	84	15	0.482759	0.00309684	0.0963412
GATCGGTGCAAGTCAAG	s	Th	1	AP2B1	163	Adaptor-related protein complex 2, beta 1 subunit	42	42	9	10	4	0.238095	0.010217	0.213242
GATCCCCGGCCTCAGTC	s	T	1	AP2M1	1173	Adaptor-related protein complex 2, mu 1 subunit	359	359	61	0	0	0	0	0.0343782
GATCAGCGCAGAGATTG	s	Th	2	AP2M1	1173	Adaptor-related protein complex 2, mu 1 subunit	5	5	5	20	5	4	0.137953	0.60678
GATCAAGCGCTGCAGCT	s	Th	5	AP2M1	1173	Adaptor-related protein complex 2, mu 1 subunit	8	8	8	0	0	0	0.0909465	0.618326
GATCATTTACCGCCGCT	s	Th	1	AP2S1	1175	Adaptor-related protein complex 2, sigma 1 subunit	344	344	10	235	43	0.68314	0.012785	0.169676
GATCTGTGCAGAGAGAG	s	Th	1	AP3B2	8120	Adaptor-related protein complex 3, beta 2 subunit	217	217	6	221	25	1.01843	0.908023	0.878343
GATCCCAGGCCACGCGC	s	T	4	AP3D1	8943	Adaptor-related protein complex 3, delta 1 subunit	35	35	10	0	0	0	0.00171353	0.0929818
GATCAGTATGTGAAGCT	s	Th	3	AP3D1	8943	Adaptor-related protein complex 3, delta 1 subunit	23	23	7	8	9	0.347826	0.153488	0.615908
GATCTTAGCCATCCCAA	s	Th	1	AP3M1	26985	Adaptor-related protein complex 3, mu 1 subunit	3	3	3	44	8	14.6667	0.000556847	0.0920388
GATCCACCACGCCCGGC	s	Th	5	AP3M1	26985	Adaptor-related protein complex 3, mu 1 subunit	0	0.9	0	21	20	23.3333	0.00670973	0.22588
GATCCTACCGGAAACCA	s	T	1	AP3M1	26985	Adaptor-related protein complex 3, mu 1 subunit	2	2	2	13	6	6.5	0.141793	0.651863
GATCATGGGTGTAAGCA	s	T	1	AP3M2	10947	Adaptor-related protein complex 3, mu 2 subunit	27	27	11	0	0	0	0.00748908	0.129606
GATCGGTGTTTATTTCG	s	T	1	AP3S2	10239	Adaptor-related protein complex 3, sigma 2 subunit	41	41	17	0	0	0	0.000651958	0.0699457
GATCAGAACTTACAAAC	s	Th	3	AP4M1	9179	Adaptor-related protein complex 4, mu 1 subunit	0	0.9	0	38	5	42.2222	0.000386126	0.0922803
GATCCATGTAATCTGAC	s	T	1	APBA2	321	Amyloid beta (A4) precursor protein-binding, family A, member 2 (X11-like)	232	232	4	180	46	0.775862	0.188006	0.621798
GATCAGGGACTGGGCTG	s	Th	1	APBA2BP	63941	Amyloid beta (A4) precursor protein-binding, family A, member 2 binding protein	158	158	7	102	2	0.64557	0.046691	0.39591
GATCAATGGGCAGAGTG	s	Th	3	APBA3	9546	Amyloid beta (A4) precursor protein-binding, family A, member 3 (X11-like 2)	23	23	1	0	0	0	0.00577204	0.173524
GATCAAGGTCTTGACAG	s	Th	4	APBA3	9546	Amyloid beta (A4) precursor protein-binding, family A, member 3 (X11-like 2)	0	0.9	0	11	1	12.2222	0.0404366	0.594545
GATCTAATCCCTTCAAG	s	Th	1	APBB1	322	Amyloid beta (A4) precursor protein-binding, family B, member 1 (Fe65)	72	72	3	0	0	0	2.8629e-06	0.0343782
GATCTGCTCCAAGATTA	s	Th	1	APBB2	323	Amyloid beta (A4) precursor protein-binding, family B, member 2 (Fe65-like)	3	3	3	8	2	2.66667	0.294196	0.792038
GATCCTTGTCCACCGTC	s	T	1	APBB3	10307	Amyloid beta (A4) precursor protein-binding, family B, member 3	43	43	5	32	5	0.744186	0.554433	0.817538
GATCCCAACTCCAGTGA	s	Th	4	APC	324	Adenomatosis polyposis coli	106	106	6	44	2	0.415094	0.00654526	0.161137
GATCAGAGGGTGACTGA	s	Th	1	APC	324	Adenomatosis polyposis coli	25	25	2	8	9	0.32	0.153488	0.435815
GATCTGCCCAGGCTGAA	s	T	2	APC2	10297	Adenomatosis polyposis coli 2	95	95	15	171	3	1.8	0.0142114	0.227074
GATCCCGTTCATGCAGA	s	T	5	APC2	10297	Adenomatosis polyposis coli 2	15	15	2	0	0	0	0.0344982	0.372717
GATCCCCCTGCCTGTCG	s	Th	5	APC2	10297	Adenomatosis polyposis coli 2	16	16	1	15	9	0.9375	0.93867	0.868082
GATCAGCCTGTGCCACA	s	Th	1	APEH	327	N-acylaminoacyl-peptide hydrolase	44	44	11	149	13	3.38636	1.55384e-05	0.0444611
GATCACTGTCCTATCAC	s	Th	1	APEX1	328	APEX nuclease (multifunctional DNA repair enzyme) 1	64	64	1	23	21	0.359375	0.0118076	0.223028
GATCCGTTCCAAGGCCC	s	T	2	APEX1	328	APEX nuclease (multifunctional DNA repair enzyme) 1	0	0.9	0	13	13	14.4444	0.034404	0.404659
GATCCCACCTGCCTGTC	s	Th	1	APH1A	51107	Anterior pharynx defective 1 homolog A (C. elegans)	75	75	10	190	2	2.53333	7.00073e-05	0.059695
GATCCATGGAGACTCAC	s	T	1	APH1A	51107	Anterior pharynx defective 1 homolog A (C. elegans)	15	15	1	13	13	0.866667	0.86845	0.859313
GATCAGCCAGTGGCCCA	s	T	1	API5	8539	Apoptosis inhibitor 5	58	58	1	69	70	1.18966	0.613014	0.854079
GATCCTTCACAGCTCCC	s	Th	1	APIP	51074	APAF1 interacting protein	61	61	26	26	1	0.42623	0.0323741	0.372762
GATCCCAGAACTTTGCA	s	T	4	APIP	51074	APAF1 interacting protein	2	2	2	7	0	3.5	0.49943	0.792038
GATCATTTCACACCCTT	s	T	1	APLP1	333	Amyloid beta (A4) precursor-like protein 1	375	375	12	136	20	0.362667	3.2278e-08	0.0343782
GATCATGGGAGCGGGCG	s	T	4	APLP1	333	Amyloid beta (A4) precursor-like protein 1	85	85	2	9	10	0.105882	7.01686e-05	0.0388462
GATCCCGAGAAGGCACA	s	Th	4	APLP1	333	Amyloid beta (A4) precursor-like protein 1	5	5	5	0	0	0	0.167517	0.678357
GATCGGTTCCGTGGTGT	s	Th	1	APLP1	333	Amyloid beta (A4) precursor-like protein 1	8	8	5	5	2	0.625	0.694362	0.853335
GATCTGTGGAGAATGTA	s	Th	1	APLP2	334	Amyloid beta (A4) precursor-like protein 2	162	162	7	253	3	1.56173	0.0131981	0.230065
GATCCAGCCAGACTTGC	s	T	1	APOA1BP	128240	Apolipoprotein A-I binding protein	86	86	3	284	47	3.30233	2.11604e-08	0.0343782
GATCCTCTTGCCCTAGC	s	T	5	APOA1BP	128240	Apolipoprotein A-I binding protein	13	13	14	0	0	0	0.0586249	0.399179
GATCGTCTTGGAAGGCC	s	T	1	APOC1	341	Apolipoprotein C-I	37	37	5	817	11	22.0811	0	0.0343782
GATCCCCCAGGTTCAGA	s	Th	1	APOC2	344	Apolipoprotein C-II	61	61	9	171	17	2.80328	6.9227e-05	0.0508427
GATCTTGGCAAGAAACC	s	Th	1	APOD	347	Apolipoprotein D	253	253	21	523	42	2.06719	4.53383e-08	0.0343782
GATCCTGGCCACCGACT	s	Th	4	APOD	347	Apolipoprotein D	5	5	5	10	1	2	0.615841	0.820362
GATCCTTGAGTCCTACT	s	T	1	APOE	348	Apolipoprotein E	0	0.9	0	56	2	62.2222	4.2002e-05	0.043986
GATCCATGAGATGCTGC	s	Th	5	APOL2	23780	Apolipoprotein L, 2	12	12	0	0	0	0	0.0509456	0.399179
GATCTATCAGCGTCTGA	s	Th	4	APOL3	80833	Apolipoprotein L, 3	5	5	1	0	0	0	0.167517	0.678357
GATCTGCAGCTTCGCGG	s	T	5	APOLD1	81575	Apolipoprotein L domain containing 1	0	0.9	0	11	7	12.2222	0.0669655	0.594545
GATCATCCATCGCCTTA	s	Th	1	APOLD1	81575	Apolipoprotein L domain containing 1	2	2	2	8	9	4	0.294196	0.792038
GATCGCTTTCTACACTG	s	Th	1	APP	351	Amyloid beta (A4) precursor protein (peptidase nexin-II, Alzheimer disease)	137	137	27	8	9	0.0583942	6.05886e-09	0.0343782
GATCTGTGTGCCTGTGC	s	Th	4	APP	351	Amyloid beta (A4) precursor protein (peptidase nexin-II, Alzheimer disease)	3	3	0	5	5	1.66667	0.535479	0.848303
GATCATGATGCTGCGAT	s	T	2	APPL1	26060	Adaptor protein, phosphotyrosine interaction, PH domain and leucine zipper containing 1	7	7	0	7	8	1	0.910701	0.875747
GATCACTGTGGACAGGG	s	Th	1	APPL2	55198	Adaptor protein, phosphotyrosine interaction, PH domain and leucine zipper containing 2	116	116	32	276	28	2.37931	5.57586e-06	0.0388462
GATCAGAACAGAGGGAG	s	T	5	APPL2	55198	Adaptor protein, phosphotyrosine interaction, PH domain and leucine zipper containing 2	5	5	5	0	0	0	0.181179	0.678357
GATCCCAGGGAAATATC	s	T	2	APRT	353	Adenine phosphoribosyltransferase	10	10	4	0	0	0	0.101495	0.433224
GATCGAGATGGTACAAG	s	Th	1	APTX	54840	Aprataxin	50	50	5	7	7	0.14	0.00138576	0.0994113
GATCAGCTTTGAAGGCT	s	T	1	AQP1	358	Aquaporin 1 (Colton blood group)	126	126	12	182	37	1.44444	0.0883142	0.608094
GATCACTACTGGGGCAA	s	Th	5	AQP3	360	Aquaporin 3 (Gill blood group)	5	5	2	0	0	0	0.167517	0.678357
GATCAAAAATTGTGGCC	s	T	1	AQP4	361	Aquaporin 4	251	251	8	0	0	0	2.22045e-16	0.0343782
GATCGCACTGAAAGCAG	s	T	1	AQP4	361	Aquaporin 4	5	5	5	19	4	3.8	0.199125	0.60678
GATCCTGAGTCTGGGCA	s	T	4	AQR	9716	Aquarius homolog (mouse)	18	18	6	0	0	0	0.0205587	0.231134
GATCATCACCAGTTACC	s	Th	3	AQR	9716	Aquarius homolog (mouse)	0	0.9	0	5	2	5.55556	0.147326	0.686951
GATCACTGAGTGTGTCT	s	Th	1	AQR	9716	Aquarius homolog (mouse)	5	5	2	15	1	3	0.23068	0.688636
GATCCTCATATGGCCCA	s	T	3	AR	367	Androgen receptor (dihydrotestosterone receptor; testicular feminization; spinal and bulbar muscular atrophy; Kennedy disease)	43	43	5	0	0	0	0.000651958	0.0620318
GATCCCCCATTCCCCAC	s	T	1	ARAF	369	V-raf murine sarcoma 3611 viral oncogene homolog	33	33	5	111	29	3.36364	0.00042834	0.0708454
GATCATCCAGTACGTGG	s	T	1	ARC	23237	Activity-regulated cytoskeleton-associated protein	7	7	6	330	56	47.1429	0	0.0343782
GATCGGGAAGTGCCGGG	s	Th	5	ARC	23237	Activity-regulated cytoskeleton-associated protein	0	0.9	0	15	3	16.6667	0.021955	0.383968
GATCAGTGAAGTGGAGC	s	Th	1	ARD1A	8260	ARD1 homolog A, N-acetyltransferase (S. cerevisiae)	103	103	4	225	37	2.18447	0.000138103	0.0699685
GATCACAGACAAGCTGG	s	Th	2	ARF1	375	ADP-ribosylation factor 1	184	184	0	56	6	0.304348	4.08306e-06	0.0343782
GATCCCCGCAACTCGCT	s	T	1	ARF1	375	ADP-ribosylation factor 1	1315	1315	1	1795	109	1.36502	3.51788e-06	0.0388462
GATCAGCCTGGGCAGGA	s	T	5	ARF1	375	ADP-ribosylation factor 1	0	0.9	0	15	15	16.6667	0.034404	0.383968
GATCTTGGTAGTATCCC	s	Th	1	ARF3	377	ADP-ribosylation factor 3	150	150	24	0	0	0	1.3693e-11	0.0343782
GATCCAAAACACTACTC	s	Th	1	ARF4	378	ADP-ribosylation factor 4	31	31	1	77	6	2.48387	0.0109707	0.224941
GATCACCGAAGCAGCCA	s	T	1	ARFGAP1	55738	ADP-ribosylation factor GTPase activating protein 1	60	60	16	351	20	5.85	4.21885e-15	0.0343782
GATCAGGAGAGGCTGAG	s	T	2	ARFGAP1	55738	ADP-ribosylation factor GTPase activating protein 1	5	5	5	0	0	0	0.181179	0.678357
GATCCTTTATGGACCAA	s	Th	1	ARFGEF1	10565	ADP-ribosylation factor guanine nucleotide-exchange factor 1(brefeldin A-inhibited)	16	16	1	8	9	0.5	0.523147	0.778147
GATCAGGTGGTACATCA	s	Th	1	ARFGEF2	10564	ADP-ribosylation factor guanine nucleotide-exchange factor 2 (brefeldin A-inhibited)	3	3	3	5	1	1.66667	0.535479	0.848303
GATCTTGCCTTGAGGAA	s	Th	1	ARFRP1	10139	ADP-ribosylation factor related protein 1	52	52	12	21	23	0.403846	0.0545193	0.372528
GATCTGAACACTGCTCA	s	Th	5	ARGLU1	55082	Hypothetical protein FLJ10154	30	30	7	0	0	0	0.0020268	0.121827
GATCTGATAAGGATTTG	s	Th	1	ARGLU1	55082	Hypothetical protein FLJ10154	8	8	4	0	0	0	0.0909465	0.618326
GATCCCGGGACAAGGAG	s	T	4	ARGLU1	55082	Hypothetical protein FLJ10154	45	45	0	24	6	0.533333	0.203028	0.654358
GATCACACTCCAGCCTG	s	T	5	ARHGAP1	392	Rho GTPase activating protein 1	10	10	10	26	27	2.6	0.148671	0.658939
GATCTATTTGGTCTTTC	s	T	1	ARHGAP1	392	Rho GTPase activating protein 1	5	5	5	4	4	0.8	0.630424	0.883973
GATCAGAAGGGAAGGGG	s	Th	1	ARHGAP12	94134	Rho GTPase activating protein 12	9	9	3	0	0	0	0.0909465	0.433224
GATCAAGTTCCTTGCAA	s	Th	1	ARHGAP17	55114	Rho GTPase activating protein 17	14	14	7	0	0	0	0.0290848	0.372717
GATCCTTTTCCTGCCTG	s	T	2	ARHGAP17	55114	Rho GTPase activating protein 17	0	0.9	0	7	7	7.77778	0.134721	0.636774
GATCCTGGATGGAACTG	s	T	1	ARHGAP21	57584	Rho GTPase activating protein 21	292	292	28	410	15	1.40411	0.0153306	0.240785
GATCCAGGCAGCCACCG	s	Th	1	ARHGAP22	58504	Rho GTPase activating protein 22	23	23	13	18	20	0.782609	0.657297	0.848186
GATCAGCCTCCGCAACA	s	T	1	ARHGAP25	9938	Rho GTPase activating protein 25	7	7	0	19	3	2.71429	0.199125	0.673597
GATCAAACCCATGAATG	s	Th	1	ARHGAP26	23092	Rho GTPase activating protein 26	33	33	0	0	0	0	0.00120832	0.0977861
GATCGGCTGGGTGCTGA	s	Th	5	ARHGAP26	23092	Rho GTPase activating protein 26	11	11	2	0	0	0	0.0509456	0.433224
GATCTGTGAACCTGAGG	s	T	5	ARHGAP26	23092	Rho GTPase activating protein 26	7	7	3	0	0	0	0.181179	0.618326
GATCACTTCCCCACTGT	s	Th	1	ARHGAP27	201176	Rho GTPase activating protein 27	5	5	5	11	1	2.2	0.380845	0.820362
GATCATTTTCTTGGGAC	s	Th	1	ARHGAP5	394	Rho GTPase activating protein 5	28	28	4	0	0	0	0.00341255	0.129606
GATCCAGGAGCTGGACA	s	T	1	ARHGDIA	396	Rho GDP dissociation inhibitor (GDI) alpha	495	495	7	254	22	0.513131	4.23518e-06	0.0343782
GATCTTCCACGTCTCCA	s	Th	1	ARHGDIB	397	Rho GDP dissociation inhibitor (GDI) beta	3	3	3	72	6	24	6.90253e-06	0.0343782
GATCAGGTCAGAGTCCA	s	Th	4	ARHGDIB	397	Rho GDP dissociation inhibitor (GDI) beta	5	5	1	0	0	0	0.167517	0.678357
GATCTCCTTCAAGGTCC	s	T	1	ARHGDIG	398	Rho GDP dissociation inhibitor (GDI) gamma	246	246	26	63	5	0.256098	5.04591e-08	0.0343782
GATCTCACAGGGGACCT	s	Th	5	ARHGDIG	398	Rho GDP dissociation inhibitor (GDI) gamma	17	17	7	0	0	0	0.0168196	0.231134
GATCCCCACGGAGATGC	s	T	4	ARHGEF1	9138	Rho guanine nucleotide exchange factor (GEF) 1	0	0.9	0	30	7	33.3333	0.00277623	0.127163
GATCCCTGAAAGTCCCT	s	Th	3	ARHGEF1	9138	Rho guanine nucleotide exchange factor (GEF) 1	59	59	5	123	5	2.08475	0.00690966	0.209347
GATCCCTGTCCTGGTCA	s	Th	5	ARHGEF1	9138	Rho guanine nucleotide exchange factor (GEF) 1	3	3	3	26	8	8.66667	0.0160827	0.234225
GATCACAGGGAAAGGCA	s	Th	1	ARHGEF10L	55160	Rho guanine nucleotide exchange factor (GEF) 10-like	34	34	36	31	34	0.911765	0.914958	0.85426
GATCATGGGGGTTTCTT	s	T	3	ARHGEF11	9826	Rho guanine nucleotide exchange factor (GEF) 11	12	12	1	32	12	2.66667	0.111579	0.612265
GATCACATTTTGAAATG	s	Th	1	ARHGEF12	23365	Rho guanine nucleotide exchange factor (GEF) 12	14	14	5	0	0	0	0.0290848	0.372717
GATCACATGTCCCCAGA	s	Th	1	ARHGEF16	27237	Rho guanine exchange factor (GEF) 16	30	30	1	0	0	0	0.0020268	0.121827
GATCTCCTCACAGTCGC	s	T	1	ARHGEF17	9828	Rho guanine nucleotide exchange factor (GEF) 17	0	0.9	0	87	85	96.6667	2.20516e-07	0.0343782
GATCGGGTGGGGGACAT	s	Th	2	ARHGEF17	9828	Rho guanine nucleotide exchange factor (GEF) 17	5	5	5	0	0	0	0.167517	0.678357
GATCCCAGGAATTCAGG	s	T	4	ARHGEF19	128272	Rho guanine nucleotide exchange factor (GEF) 19	0	0.9	0	58	8	64.4444	2.33168e-05	0.0406889
GATCTACCTGTCACTAC	s	Th	4	ARHGEF2	9181	Rho/rac guanine nucleotide exchange factor (GEF) 2	36	36	6	0	0	0	0.000722659	0.0929818
GATCGAAGCCTCCTATC	s	Th	1	ARHGEF2	9181	Rho/rac guanine nucleotide exchange factor (GEF) 2	59	59	4	112	8	1.89831	0.0252051	0.24321
GATCCCTTGCTCCCTGT	s	Th	2	ARHGEF2	9181	Rho/rac guanine nucleotide exchange factor (GEF) 2	5	5	5	2	2	0.4	0.592387	0.844415
GATCGTTCCTAAATCCC	s	T	4	ARHGEF3	50650	Rho guanine nucleotide exchange factor (GEF) 3	70	70	4	0	0	0	1.47283e-05	0.0343782
GATCTCTTGGTCAGGAG	s	Th	1	ARHGEF4	50649	Rho guanine nucleotide exchange factor (GEF) 4	220	220	3	38	8	0.172727	3.94725e-10	0.0343782
GATCAGGGCCATTGGTG	s	Th	2	ARHGEF4	50649	Rho guanine nucleotide exchange factor (GEF) 4	45	45	0	0	0	0	0.000156916	0.0602665
GATCTTCACATCTGCCC	s	T	1	ARHGEF6	9459	Rac/Cdc42 guanine nucleotide exchange factor (GEF) 6	30	30	5	46	4	1.53333	0.263914	0.779853
GATCCAGTATCTTCCTC	s	T	1	ARHGEF7	8874	Rho guanine nucleotide exchange factor (GEF) 7	71	71	1	186	25	2.61972	0.000156199	0.0512997
GATCAAGTAGTTGTGGA	s	Th	4	ARHGEF7	8874	Rho guanine nucleotide exchange factor (GEF) 7	20	20	7	0	0	0	0.00981802	0.216203
GATCTTTTAGTGCTTTG	s	Th	1	ARHGEF9	23229	Cdc42 guanine nucleotide exchange factor (GEF) 9	161	161	4	98	14	0.608696	0.0271027	0.238964
GATCTACCAGCCCTACG	s	Th	1	ARHGEF9	23229	Cdc42 guanine nucleotide exchange factor (GEF) 9	8	8	8	15	3	1.875	0.437667	0.793075
GATCCCCACAGTTTGGT	s	T	1	ARID1A	8289	AT rich interactive domain 1A (SWI-like)	149	149	27	410	67	2.75168	2.05787e-09	0.0343782
GATCCTGCTGCACCACA	s	T	4	ARID1A	8289	AT rich interactive domain 1A (SWI-like)	50	50	12	26	12	0.52	0.148377	0.603728
GATCCTGGGAGGTTCAG	s	Th	5	ARID1A	8289	AT rich interactive domain 1A (SWI-like)	5	5	5	0	0	0	0.167517	0.678357
GATCCTCTCCCTTTCCC	s	T	1	ARID3B	10620	AT rich interactive domain 3B (BRIGHT-like)	0	0.9	0	63	6	70	1.29653e-05	0.0388462
GATCGTGGGGGCGGGGA	s	Th	5	ARID3B	10620	AT rich interactive domain 3B (BRIGHT-like)	5	5	5	0	0	0	0.167517	0.678357
GATCCAAGACTGGCTGA	s	Th	1	ARIH1	25820	Ariadne homolog, ubiquitin-conjugating enzyme E2 binding protein, 1 (Drosophila)	3	3	0	95	4	31.6667	1.5492e-07	0.0343782
GATCTGTGGGAGTACAT	s	T	1	ARIH1	25820	Ariadne homolog, ubiquitin-conjugating enzyme E2 binding protein, 1 (Drosophila)	10	10	0	0	0	0	0.101495	0.433224
GATCTGAGTTGCAGCTC	s	T	1	ARIH2	10425	Ariadne homolog 2 (Drosophila)	41	41	10	137	4	3.34146	0.000147019	0.0512997
GATCCCCAGACAGAGTC	s	T	1	ARIH2	10425	Ariadne homolog 2 (Drosophila)	0	0.9	0	4	4	4.44444	0.290216	0.686951
GATCATTTTGACAGTTT	s	T	1	ARIH2	10425	Ariadne homolog 2 (Drosophila)	7	7	0	6	5	0.857143	0.910701	0.853335
GATCTGGACGAATGATA	s	Th	1	ARL1	400	ADP-ribosylation factor-like 1	55	55	7	0	0	0	3.46402e-05	0.0406889
GATCATTTTCTCTGGGT	s	Th	5	ARL15	54622	ADP-ribosylation factor-like 15	5	5	1	0	0	0	0.167517	0.678357
GATCACATCTTGTCTCG	s	Th	2	ARL2BP	23568	ADP-ribosylation factor-like 2 binding protein	30	30	7	46	7	1.53333	0.349298	0.779853
GATCACATTGGTCCAAC	s	Th	4	ARL4A	10124	ADP-ribosylation factor-like 4A	0	0.9	0	48	28	53.3333	7.2386e-05	0.0602665
GATCAAATCACCTTGGA	s	Th	1	ARL4C	10123	ADP-ribosylation factor-like 4C	114	114	2	0	0	0	2.91741e-09	0.0343782
GATCGCACCTGTGAATT	s	Th	1	ARL4C	10123	ADP-ribosylation factor-like 4C	33	33	18	0	0	0	0.00120832	0.0977861
GATCACTGTTCAAACCC	s	T	5	ARL4C	10123	ADP-ribosylation factor-like 4C	0	0.9	0	6	6	6.66667	0.134721	0.686951
GATCTCTACTGACCTCT	s	Th	1	ARL5A	26225	ADP-ribosylation factor-like 5A	0	0.9	0	8	8	8.88889	0.0759457	0.636774
GATCATCCATGGCACAT	s	T	3	ARL5B	221079	ADP-ribosylation factor-like 5B	7	7	4	0	0	0	0.181179	0.618326
GATCAGATTACCAGCAT	s	Th	1	ARL6	84100	ADP-ribosylation factor-like 6	20	20	5	0	0	0	0.00981802	0.216203
GATCTTTTTGTCCAAGA	s	T	1	ARL6IP1	23204	ADP-ribosylation factor-like 6 interacting protein 1	43	43	5	80	19	1.86047	0.0635276	0.432106
GATCGTTTCCCTTGCTG	s	T	2	ARL6IP1	23204	ADP-ribosylation factor-like 6 interacting protein 1	153	153	36	208	12	1.35948	0.119188	0.642974
GATCAACAAGCAAGCCA	s	Th	1	ARL6IP4	51329	ADP-ribosylation-like factor 6 interacting protein 4	286	286	18	115	16	0.402098	1.7059e-06	0.0343782
GATCAGCTGGGGAGGAA	s	T	1	ARL6IP4	51329	ADP-ribosylation-like factor 6 interacting protein 4	0	0.9	0	15	15	16.6667	0.034404	0.383968
GATCTTTCTGGCCCCTA	s	T	5	ARL6IP4	51329	ADP-ribosylation-like factor 6 interacting protein 4	5	5	5	0	0	0	0.181179	0.678357
GATCAACAAGGTGGGTG	s	Th	1	ARL6IP4	51329	ADP-ribosylation-like factor 6 interacting protein 4	30	30	4	28	7	0.933333	0.901766	0.860509
GATCTCTATCACTTTGC	s	Th	1	ARL6IP5	10550	ADP-ribosylation-like factor 6 interacting protein 5	67	67	1	5	1	0.0746269	7.35604e-05	0.0406889
GATCAGAAGAGGTGCAG	s	Th	2	ARL8A	127829	ADP-ribosylation factor-like 8A	544	544	41	190	31	0.349265	4.23661e-13	0.0343782
GATCCAGGGCCTGGGAA	s	T	1	ARL8A	127829	ADP-ribosylation factor-like 8A	60	60	4	11	11	0.183333	0.00251548	0.0918619
GATCAGCCCTCAAAGAA	s	T	1	ARL8B	55207	ADP-ribosylation factor-like 8B	163	163	0	149	23	0.91411	0.669742	0.835137
GATCCCGTGTGTGTGTG	s	T	1	ARMC10	83787	Armadillo repeat containing 10	20	20	11	48	17	2.4	0.0638969	0.432139
GATCCCTTCCTCCCTCC	s	T	4	ARMC2	84071	Armadillo repeat containing 2	0	0.9	0	50	49	55.5556	7.58015e-05	0.0512997
GATCTAAAGACCCGGGA	s	T	1	ARMC5	79798	Armadillo repeat containing 5	25	25	1	7	8	0.28	0.0848827	0.435815
GATCATTGGGTGAACAG	s	Th	1	ARMC6	93436	Armadillo repeat containing 6	0	0.9	0	41	15	45.5556	0.000220483	0.0725022
GATCCGATGGAAAGGTG	s	Th	1	ARMC7	79637	Armadillo repeat containing 7	6	6	0	0	0	0	0.167517	0.678357
GATCATGACCAACACGG	s	T	1	ARMC9	80210	Armadillo repeat containing 9	13	13	3	7	4	0.538462	0.496236	0.827468
GATCCTTTCAGCTGCCA	s	T	1	ARMCX2	9823	Armadillo repeat containing, X-linked 2	108	108	13	93	9	0.861111	0.531929	0.820003
GATCGACCTGAGCACAG	s	Th	1	ARMET	7873	Arginine-rich, mutated in early stage tumors	61	61	4	116	27	1.90164	0.0202921	0.36988
GATCCTTGCTCCCAACG	s	T	1	ARNT2	9915	Aryl-hydrocarbon receptor nuclear translocator 2	216	216	32	310	39	1.43519	0.0248462	0.389774
GATCAAGTAGTCCCAGT	s	Th	1	ARNTL	406	Aryl hydrocarbon receptor nuclear translocator-like	0	0.9	0	7	1	7.77778	0.147326	0.636774
GATCATGTGACTTCAAA	s	T	1	ARPC1A	10552	Actin related protein 2/3 complex, subunit 1A, 41kDa	53	53	15	30	30	0.566038	0.173556	0.646502
GATCAAATGACCTGTGA	s	Th	1	ARPC1B	10095	Actin related protein 2/3 complex, subunit 1B, 41kDa	9	9	9	15	16	1.66667	0.437667	0.845399
GATCCACACGTTCCGGG	s	T	2	ARPC2	10109	Actin related protein 2/3 complex, subunit 2, 34kDa	339	339	6	492	68	1.45133	0.00390642	0.170128
GATCCTGATACCAAACT	s	T	1	ARPC3	10094	Actin related protein 2/3 complex, subunit 3, 21kDa	0	0.9	0	11	0	12.2222	0.0669655	0.594545
GATCCTCCCTCCCCTAA	s	T	1	ARPC4	10093	Actin related protein 2/3 complex, subunit 4, 20kDa	53	53	8	215	42	4.0566	7.76903e-08	0.0343782
GATCTCGTGGCCTTCCC	s	Th	1	ARPC4	10093	Actin related protein 2/3 complex, subunit 4, 20kDa	11	11	11	3	3	0.272727	0.197872	0.688701
GATCCAAACAAATACAC	s	T	1	ARPC5	10092	Actin related protein 2/3 complex, subunit 5, 16kDa	2	2	2	59	1	29.5	0.000106657	0.0512997
GATCCCAGGGCTGTGGG	s	T	4	ARPC5L	81873	Actin related protein 2/3 complex, subunit 5-like	8	8	2	0	0	0	0.101495	0.618326
GATCCAAGGGCTGTGGT	s	T	1	ARPC5L	81873	Actin related protein 2/3 complex, subunit 5-like	216	216	19	277	1	1.28241	0.130998	0.666496
GATCTGTGAAATGCTAA	s	T	1	ARPP-19	10776	Cyclic AMP phosphoprotein, 19 kD	35	35	4	0	0	0	0.00171353	0.0929818
GATCTGTTACTGCATCA	s	Th	1	ARPP-19	10776	Cyclic AMP phosphoprotein, 19 kD	16	16	6	0	0	0	0.0290848	0.372717
GATCACTTGTGTGGATT	s	Th	4	ARPP-21	10777	Cyclic AMP-regulated phosphoprotein, 21 kD	14	14	4	0	0	0	0.0290848	0.372717
GATCTCAGACCCATACC	s	Th	1	ARPP-21	10777	Cyclic AMP-regulated phosphoprotein, 21 kD	16	16	15	0	0	0	0.0290848	0.372717
GATCGCTGTCCCGCACC	s	Th	1	ARPP-21	10777	Cyclic AMP-regulated phosphoprotein, 21 kD	81	81	18	46	10	0.567901	0.081141	0.428754
GATCACGGTGATGAACC	s	Th	3	ARRB1	408	Arrestin, beta 1	0	0.9	0	33	1	36.6667	0.00119467	0.120621
GATCCCCACTGTCAATG	s	T	1	ARRB2	409	Arrestin, beta 2	242	242	6	186	18	0.768595	0.145577	0.605387
GATCCTGGTGCCTGCCT	s	T	1	ARRDC1	92714	Arrestin domain containing 1	45	45	13	13	5	0.288889	0.0337667	0.226786
GATCCAAACCCACTCTT	s	T	2	ARRDC2	27106	Arrestin domain containing 2	71	71	1	2	2	0.028169	3.84333e-05	0.0343782
GATCCAAACCCACCCTT	s	T	3	ARRDC2	27106	Arrestin domain containing 2	22	22	3	24	5	1.09091	0.833806	0.861019
GATCCAGAAACCCTGGT	s	T	5	ARRDC4	91947	Arrestin domain containing 4	15	15	1	6	2	0.4	0.323488	0.673901
GATCTGTTCTTTGGATT	s	Th	1	ARSB	411	Arylsulfatase B	0	0.9	0	46	13	51.1111	0.000126201	0.0620318
GATCTGAGAAGTGAGTG	s	T	1	ARSD	414	Arylsulfatase D	30	30	5	0	0	0	0.00456115	0.121827
GATCCAGGAGAGCTGAT	s	Th	4	ARSD	414	Arylsulfatase D	6	6	0	2	2	0.333333	0.592387	0.844415
GATCCCTGTGGTGGTGT	s	T	1	ARSI	340075	Arylsulfatase family, member I	0	0.9	0	9	9	10	0.0669655	0.594545
GATCGTGCCGTGGAGCT	s	Th	1	ARVCF	421	Armadillo repeat gene deletes in velocardiofacial syndrome	83	83	2	79	14	0.951807	0.805324	0.858909
GATCTGGTGGGCAGTCG	s	Th	1	ASAH1	427	N-acylsphingosine amidohydrolase (acid ceramidase) 1	75	75	1	169	18	2.25333	0.000614697	0.0990453
GATCAAGATACGGAAGA	s	Th	1	ASAH1	427	N-acylsphingosine amidohydrolase (acid ceramidase) 1	19	19	2	0	0	0	0.0168196	0.216203
GATCTTTTTTTTTTCCC	s	T	3	ASAH1	427	N-acylsphingosine amidohydrolase (acid ceramidase) 1	51	51	20	54	11	1.05882	0.894716	0.860869
GATCCTTCTGCACCTAG	s	T	1	ASAH2B	653308	N-acylsphingosine amidohydrolase (non-lysosomal ceramidase) 2B	0	0.9	0	6	2	6.66667	0.134721	0.686951
GATCAGTCAGTGTTTCT	s	Th	1	ASB13	79754	Ankyrin repeat and SOCS box-containing 13	6	6	6	2	2	0.333333	0.592387	0.844415
GATCACTCCAGTGGTGA	s	Th	1	ASB6	140459	Ankyrin repeat and SOCS box-containing 6	92	92	20	10	4	0.108696	5.07578e-06	0.0343782
GATCCAGGCGCCACGCT	s	T	3	ASB6	140459	Ankyrin repeat and SOCS box-containing 6	85	85	5	130	25	1.52941	0.111339	0.614294
GATCCCATCCTGAGACC	s	Th	1	ASCC2	84164	Activating signal cointegrator 1 complex subunit 2	66	66	16	180	1	2.72727	3.89782e-05	0.0503822
GATCCAGTGACAGCAGG	s	T	1	ASCC3L1	23020	Activating signal cointegrator 1 complex subunit 3-like 1	217	217	30	548	56	2.52535	1.23445e-10	0.0343782
GATCCGCACGTCAAGAC	s	T	2	ASCC3L1	23020	Activating signal cointegrator 1 complex subunit 3-like 1	0	0.9	0	22	23	24.4444	0.00957784	0.184749
GATCACAGGTTAGGGGT	s	Th	1	ASCC3L1	23020	Activating signal cointegrator 1 complex subunit 3-like 1	22	22	5	36	9	1.63636	0.295409	0.791839
GATCAAGAGGCCACCAG	s	Th	1	ASCL1	429	Achaete-scute complex homolog 1 (Drosophila)	62	62	1	256	23	4.12903	1.05178e-09	0.0343782
GATCAGGCATATTTGTG	s	T	1	ASF1A	25842	ASF1 anti-silencing function 1 homolog A (S. cerevisiae)	13	13	1	2	2	0.153846	0.223086	0.642973
GATCCTAGACTCGGTGC	s	Th	2	ASF1B	55723	ASF1 anti-silencing function 1 homolog B (S. cerevisiae)	0	0.9	0	69	11	76.6667	2.66252e-06	0.0343782
GATCTGGCTTTTCCTGG	s	Th	1	ASF1B	55723	ASF1 anti-silencing function 1 homolog B (S. cerevisiae)	0	0.9	0	11	1	12.2222	0.0404366	0.594545
GATCACTCCAGCCTGCT	s	Th	3	ASGR1	432	Asialoglycoprotein receptor 1	0	0.9	0	95	1	105.556	3.4391e-08	0.0343782
GATCCCCTTGAGCAGAG	s	T	1	ASH1L	55870	Ash1 (absent, small, or homeotic)-like (Drosophila)	27	27	12	67	17	2.48148	0.0244342	0.369925
GATCCCTATTCCTACCC	s	Th	4	ASH1L	55870	Ash1 (absent, small, or homeotic)-like (Drosophila)	9	9	0	0	0	0	0.0909465	0.433224
GATCCAGATGACCTAGA	s	Th	5	ASH1L	55870	Ash1 (absent, small, or homeotic)-like (Drosophila)	5	5	2	0	0	0	0.167517	0.678357
GATCTCACTTACCGCCC	s	Th	2	ASH2L	9070	Ash2 (absent, small, or homeotic)-like (Drosophila)	0	0.9	0	11	3	12.2222	0.0404366	0.594545
GATCCGCCAGGTGCGGG	s	T	1	ASL	435	Argininosuccinate lyase	93	93	7	104	10	1.11828	0.674733	0.859739
GATCCTGCATGACTGGC	s	T	1	ASMTL	8623	Acetylserotonin O-methyltransferase-like	141	141	4	87	0	0.617021	0.0620459	0.392985
GATCCTCAGCAACGCGG	s	T	2	ASMTL	8623	Acetylserotonin O-methyltransferase-like	10	10	0	4	0	0.4	0.373777	0.810937
GATCCAGGCCAAGTATC	s	Th	1	ASNA1	439	ArsA arsenite transporter, ATP-binding, homolog 1 (bacterial)	9	9	10	23	2	2.55556	0.179519	0.713445
GATCAATGCCACTGACC	s	Th	1	ASNS	440	Asparagine synthetase	94	94	16	171	16	1.81915	0.00803236	0.214414
GATCCCACTGGGCGGAG	s	T	1	ASPA	443	Aspartoacylase (Canavan disease)	37	37	1	11	11	0.297297	0.0534023	0.240731
GATCTTGCCCAGTACAG	s	T	1	ASPH	444	Aspartate beta-hydroxylase	41	41	7	0	0	0	0.000651958	0.0699457
GATCTTACCGTGCAAGT	s	Th	5	ASPH	444	Aspartate beta-hydroxylase	5	5	2	0	0	0	0.167517	0.678357
GATCCCTCCTGGCTGTG	s	Th	3	ASPHD1	253982	Aspartate beta-hydroxylase domain containing 1	367	367	23	164	27	0.446866	8.10264e-07	0.0343782
GATCGGTGGCAGCCATG	s	Th	3	ASPHD2	57168	Aspartate beta-hydroxylase domain containing 2	50	50	1	31	1	0.62	0.292339	0.670069
GATCCCCAGCAGGAGCA	s	Th	1	ASPSCR1	79058	Alveolar soft part sarcoma chromosome region, candidate 1	28	28	7	59	18	2.10714	0.0630228	0.506674
GATCAGGGAGTGCCTGC	s	Th	1	ASPSCR1	79058	Alveolar soft part sarcoma chromosome region, candidate 1	6	6	3	0	0	0	0.167517	0.678357
GATCAGCCCGTGGACCG	s	T	4	ASPSCR1	79058	Alveolar soft part sarcoma chromosome region, candidate 1	3	3	0	9	2	3	0.265396	0.734393
GATCCCGAGTTCAACGC	s	Th	3	ASRGL1	80150	Asparaginase like 1	5	5	5	67	3	13.4	4.51162e-05	0.0444611
GATCGGGCGCTGTGCAG	s	Th	1	ASRGL1	80150	Asparaginase like 1	187	187	13	210	13	1.12299	0.528489	0.849147
GATCCCCCAAGTACAGG	s	Th	1	ASS1	445	Argininosuccinate synthetase 1	64	64	1	20	21	0.3125	0.00575836	0.173685
GATCTCAACCTGCTGAC	s	Th	1	ASTN1	460	Astrotactin 1	122	122	7	23	8	0.188525	5.2515e-06	0.0343782
GATCCTGGGGCCTGGGT	s	T	1	ASTN2	23245	Astrotactin 2	43	43	12	37	10	0.860465	0.720645	0.855966
GATCTGGTCCATGAGGC	s	Th	1	ASXL1	171023	Additional sex combs like 1 (Drosophila)	27	27	7	89	6	3.2963	0.00164989	0.125941
GATCATGTGCCAAGGCT	s	T	1	ASXL1	171023	Additional sex combs like 1 (Drosophila)	8	8	2	43	12	5.375	0.0109385	0.171274
GATCGTTTATTCTTCAG	s	T	1	ATAD1	84896	ATPase family, AAA domain containing 1	0	0.9	0	11	0	12.2222	0.0669655	0.594545
GATCAGCATTGAATGGT	s	T	1	ATAD1	84896	ATPase family, AAA domain containing 1	8	8	1	0	0	0	0.101495	0.618326
GATCTAGTTTGGTGTGT	s	T	3	ATAD1	84896	ATPase family, AAA domain containing 1	5	5	5	0	0	0	0.181179	0.678357
GATCTTTCACACACTGG	s	Th	1	ATAD3A	55210	ATPase family, AAA domain containing 3A	14	14	8	20	8	1.42857	0.702239	0.853211
GATCGCTCAGCTGGCCG	s	Th	1	ATAD3B	83858	ATPase family, AAA domain containing 3B	95	95	5	125	30	1.31579	0.29597	0.75584
GATCCTGAGAATGAACA	s	T	3	ATAD5	79915	ATPase family, AAA domain containing 5	0	0.9	0	13	2	14.4444	0.034404	0.404659
GATCACTACGATTGACG	s	Th	1	ATCAY	85300	Ataxia, cerebellar, Cayman type (caytaxin)	270	270	8	208	1	0.77037	0.115608	0.600589
GATCAGACTGAAAAACG	s	Th	1	ATF2	1386	Activating transcription factor 2	48	48	3	8	2	0.166667	0.00401138	0.123426
GATCTCTTTGCCCCCCT	s	T	2	ATF4	468	Activating transcription factor 4 (tax-responsive enhancer element B67)	0	0.9	0	58	3	64.4444	2.33168e-05	0.0406889
GATCCAGTACCTGAAAG	s	Th	1	ATF4	468	Activating transcription factor 4 (tax-responsive enhancer element B67)	22	22	4	0	0	0	0.00981802	0.173524
GATCTCCTTCCCTCCTT	s	T	1	ATF5	22809	Activating transcription factor 5	0	0.9	0	11	7	12.2222	0.0669655	0.594545
GATCTCATACAGCGATG	s	Th	5	ATF6	22926	Activating transcription factor 6	6	6	0	0	0	0	0.167517	0.678357
GATCTCTTCTACCCAGA	s	Th	1	ATF7IP	55729	Activating transcription factor 7 interacting protein	5	5	5	3	4	0.6	0.592387	0.844415
GATCCTGGGAGTTCGAG	s	T	1	ATG10	83734	ATG10 autophagy related 10 homolog (S. cerevisiae)	27	27	4	6	5	0.222222	0.0848827	0.295882
GATCAGGCATGGTGGCT	s	T	5	ATG12	9140	ATG12 autophagy related 12 homolog (S. cerevisiae)	15	15	8	0	0	0	0.0344982	0.372717
GATCACCGCTTTCCAAT	s	Th	1	ATG16L1	55054	ATG16 autophagy related 16-like 1 (S. cerevisiae)	39	39	10	0	0	0	0.000433378	0.0699457
GATCCGTACCTGGGGCC	s	Th	5	ATG16L2	89849	ATG16 autophagy related 16-like 2 (S. cerevisiae)	0	0.9	0	61	7	67.7778	7.965e-06	0.0388462
GATCCGGTTCTGGGACA	s	T	3	ATG16L2	89849	ATG16 autophagy related 16-like 2 (S. cerevisiae)	60	60	9	15	15	0.25	0.00640056	0.12961
GATCCGCCAGCTGCCCC	s	T	1	ATG2A	23130	ATG2 autophagy related 2 homolog A (S. cerevisiae)	28	28	4	50	12	1.78571	0.189125	0.662863
GATCATTGGAAGCTGCC	s	Th	1	ATG2B	55102	ATG2 autophagy related 2 homolog B (S. cerevisiae)	5	5	1	2	2	0.4	0.592387	0.844415
GATCTGTGCCCTTGCTT	s	Th	1	ATG4B	23192	ATG4 autophagy related 4 homolog B (S. cerevisiae)	14	14	14	0	0	0	0.0290848	0.372717
GATCTTTGCCCAAGCCC	s	T	4	ATG4B	23192	ATG4 autophagy related 4 homolog B (S. cerevisiae)	18	18	8	28	10	1.55556	0.456156	0.804116
GATCAACTATTTGCCTG	s	T	1	ATG5	9474	ATG5 autophagy related 5 homolog (S. cerevisiae)	0	0.9	0	87	0	96.6667	2.20516e-07	0.0343782
GATCTGGGACATGAGCG	s	Th	2	ATG7	10533	ATG7 autophagy related 7 homolog (S. cerevisiae)	0	0.9	0	46	4	51.1111	0.000126201	0.0620318
GATCCTGGCACAGTGCC	s	T	1	ATG9A	79065	ATG9 autophagy related 9 homolog A (S. cerevisiae)	237	237	4	210	8	0.886076	0.492765	0.780398
GATCTCCAGAGTGAGCG	s	T	1	ATHL1	80162	ATH1, acid trehalase-like 1 (yeast)	23	23	11	6	2	0.26087	0.133338	0.420916
GATCAATATGTGACTGG	s	Th	1	ATIC	471	5-aminoimidazole-4-carboxamide ribonucleotide formyltransferase/IMP cyclohydrolase	22	22	7	0	0	0	0.00981802	0.173524
GATCTGGATAGCTTGGA	s	Th	4	ATN1	1822	Atrophin 1	69	69	18	0	0	0	4.70449e-06	0.0343782
GATCAAGAGAGCACCAT	s	Th	4	ATN1	1822	Atrophin 1	12	12	9	0	0	0	0.0509456	0.399179
GATCCCTGTGTGCGCGC	s	T	3	ATN1	1822	Atrophin 1	438	438	26	561	54	1.28082	0.0379788	0.409475
GATCAAACAGGAGCCGG	s	Th	4	ATN1	1822	Atrophin 1	9	9	3	0	0	0	0.0909465	0.433224
GATCCTCTCTCCTTGAG	s	Th	1	ATOH8	84913	Atonal homolog 8 (Drosophila)	5	5	5	0	0	0	0.167517	0.678357
GATCCTCCCGCTGGCTT	s	T	1	ATOX1	475	ATX1 antioxidant protein 1 homolog (yeast)	121	121	3	579	57	4.78512	0	0.0343782
GATCCCTCCAGGGGAGC	s	Th	4	ATP10A	57194	ATPase, class V, type 10A	0	0.9	0	7	3	7.77778	0.147326	0.636774
GATCCTGTTCCTAAGTT	s	T	1	ATP10B	23120	ATPase, class V, type 10B	5	5	5	52	21	10.4	0.00124208	0.0741054
GATCTGTCCAGCGCTGC	s	Th	3	ATP11A	23250	ATPase, class VI, type 11A	30	30	4	0	0	0	0.0020268	0.121827
GATCCTGGCGCTCAATG	s	T	1	ATP13A1	57130	ATPase type 13A1	70	70	3	301	38	4.3	7.20122e-11	0.0343782
GATCCTGACTCCCCCAC	s	T	1	ATP13A1	57130	ATPase type 13A1	37	37	1	48	14	1.2973	0.494213	0.844299
GATCAACACCAACCTGG	s	Th	1	ATP13A2	23400	ATPase type 13A2	206	206	21	75	4	0.364078	1.49144e-05	0.0343782
GATCCTGTGTGTCAGAA	s	T	2	ATP13A3	79572	ATPase type 13A3	0	0.9	0	7	7	7.77778	0.134721	0.636774
GATCTTTCCTCTTAGGA	s	T	2	ATP13A4	84239	ATPase type 13A4	0	0.9	0	11	0	12.2222	0.0669655	0.594545
GATCTTGATATTTGGCT	s	T	1	ATP1A1	476	ATPase, Na+/K+ transporting, alpha 1 polypeptide	25	25	24	0	0	0	0.00748908	0.161136
GATCCAGGCCCTGGGAG	s	Th	4	ATP1A1	476	ATPase, Na+/K+ transporting, alpha 1 polypeptide	23	23	2	0	0	0	0.00577204	0.173524
GATCTTTATTGGTGACC	s	T	1	ATP1A2	477	ATPase, Na+/K+ transporting, alpha 2 (+) polypeptide	95	95	12	15	15	0.157895	5.42217e-05	0.0388462
GATCTCATCAGGGTAGC	s	Th	5	ATP1A2	477	ATPase, Na+/K+ transporting, alpha 2 (+) polypeptide	5	5	5	0	0	0	0.167517	0.678357
GATCCTGGCAGAAAATG	s	T	4	ATP1A3	478	ATPase, Na+/K+ transporting, alpha 3 polypeptide	15	15	4	0	0	0	0.0344982	0.372717
GATCACAAGCACAAATC	s	Th	1	ATP1B1	481	ATPase, Na+/K+ transporting, beta 1 polypeptide	125	125	1	2	2	0.016	2.91313e-09	0.0343782
GATCTGCCCATCACTTT	s	Th	1	ATP1B1	481	ATPase, Na+/K+ transporting, beta 1 polypeptide	177	177	2	7	1	0.039548	3.05755e-12	0.0343782
GATCTTGTATTCAGTCA	s	Th	1	ATP1B1	481	ATPase, Na+/K+ transporting, beta 1 polypeptide	422	422	21	56	9	0.132701	0	0.0343782
GATCAACAAGAGCACTG	s	T	1	ATP1B1	481	ATPase, Na+/K+ transporting, beta 1 polypeptide	33	33	15	0	0	0	0.00279045	0.0977861
GATCCCAAGAGCTATGA	s	Th	3	ATP1B1	481	ATPase, Na+/K+ transporting, beta 1 polypeptide	5	5	1	0	0	0	0.167517	0.678357
GATCGGTGCATCTTCCG	s	Th	4	ATP1B2	482	ATPase, Na+/K+ transporting, beta 2 polypeptide	0	0.9	0	20	11	22.2222	0.0120792	0.22588
GATCTACTGTAAAAAGA	s	T	1	ATP1B2	482	ATPase, Na+/K+ transporting, beta 2 polypeptide	12	12	2	0	0	0	0.0586249	0.399179
GATCTGCCCCCACCATC	s	T	4	ATP1B2	482	ATPase, Na+/K+ transporting, beta 2 polypeptide	35	35	14	56	25	1.6	0.283873	0.744472
GATCAGTCAGACAGGGA	s	Th	1	ATP1B2	482	ATPase, Na+/K+ transporting, beta 2 polypeptide	5	5	5	8	2	1.6	0.615841	0.85689
GATCATAGTGTTCAGTG	s	Th	2	ATP1B3	483	ATPase, Na+/K+ transporting, beta 3 polypeptide	25	25	17	34	1	1.36	0.426894	0.827386
GATCAGTTTGTTTCTTT	s	Th	1	ATP2A2	488	ATPase, Ca++ transporting, cardiac muscle, slow twitch 2	77	77	17	28	3	0.363636	0.00924156	0.163351
GATCCTCTATGTCGAAC	s	T	4	ATP2A2	488	ATPase, Ca++ transporting, cardiac muscle, slow twitch 2	5	5	5	0	0	0	0.181179	0.678357
GATCCCTCTCCAGTGAC	s	T	1	ATP2A2	488	ATPase, Ca++ transporting, cardiac muscle, slow twitch 2	20	20	3	19	0	0.95	0.907652	0.866388
GATCACGCTGAAAGGGA	s	Th	4	ATP2B1	490	ATPase, Ca++ transporting, plasma membrane 1	83	83	27	13	2	0.156627	6.42408e-05	0.043986
GATCCCTTACTTCTATC	s	Th	3	ATP2B1	490	ATPase, Ca++ transporting, plasma membrane 1	11	11	1	0	0	0	0.0509456	0.433224
GATCTTCTTCCAGCTGA	s	T	5	ATP2B1	490	ATPase, Ca++ transporting, plasma membrane 1	7	7	0	0	0	0	0.181179	0.618326
GATCTGTTTACAAGGTT	s	Th	2	ATP2B1	490	ATPase, Ca++ transporting, plasma membrane 1	14	14	2	7	7	0.5	0.284682	0.778147
GATCTCCACTGGGGGCT	s	T	3	ATP2B2	491	ATPase, Ca++ transporting, plasma membrane 2	105	105	9	0	0	0	8.87942e-08	0.0343782
GATCAGTCATGTGTCCG	s	T	1	ATP2B2	491	ATPase, Ca++ transporting, plasma membrane 2	340	340	45	82	13	0.241176	3.37448e-11	0.0343782
GATCAACCTGACGACCG	s	Th	4	ATP2B2	491	ATPase, Ca++ transporting, plasma membrane 2	37	37	17	0	0	0	0.000722659	0.073078
GATCCGACTCTTCCACG	s	Th	1	ATP2B3	492	ATPase, Ca++ transporting, plasma membrane 3	30	30	3	3	4	0.1	0.00844528	0.170127
GATCCTCTGGTTCCGGG	s	T	3	ATP2B3	492	ATPase, Ca++ transporting, plasma membrane 3	23	23	6	0	0	0	0.0123649	0.173524
GATCTTTTCCACTGGTC	s	Th	1	ATP2C1	27032	ATPase, Ca++ transporting, type 2C, member 1	44	44	2	23	8	0.522727	0.156628	0.615063
GATCAGTTTTTCCTCTT	s	T	1	ATP2C2	9914	ATPase, Ca++ transporting, type 2C, member 2	5	5	2	0	0	0	0.181179	0.678357
GATCTCAGAACAATCAG	s	Th	1	ATP5A1	498	ATP synthase, H+ transporting, mitochondrial F1 complex, alpha subunit 1, cardiac muscle	142	142	19	0	0	0	3.62168e-11	0.0343782
GATCCACTGTTGCCCAG	s	T	2	ATP5A1	498	ATP synthase, H+ transporting, mitochondrial F1 complex, alpha subunit 1, cardiac muscle	10	10	4	0	0	0	0.101495	0.433224
GATCCTGCAGGACTACA	s	T	1	ATP5B	506	ATP synthase, H+ transporting, mitochondrial F1 complex, beta polypeptide	307	307	11	204	55	0.664495	0.0144211	0.170707
GATCGAGGACTGTGTGG	s	Th	1	ATP5C1	509	ATP synthase, H+ transporting, mitochondrial F1 complex, gamma polypeptide 1	409	409	30	84	2	0.205379	6.66134e-16	0.0343782
GATCCTCCCGCCCCCCC	s	T	4	ATP5D	513	ATP synthase, H+ transporting, mitochondrial F1 complex, delta subunit	27	27	28	0	0	0	0.00748908	0.129606
GATCCGAATCGAGGCCA	s	T	1	ATP5D	513	ATP synthase, H+ transporting, mitochondrial F1 complex, delta subunit	523	523	19	386	36	0.73805	0.0149228	0.166249
GATCCCCCCAGCCTGAC	s	T	1	ATP5D	513	ATP synthase, H+ transporting, mitochondrial F1 complex, delta subunit	151	151	14	136	17	0.900662	0.632237	0.831355
GATCTCATTCCATGGGA	s	Th	1	ATP5E	514	ATP synthase, H+ transporting, mitochondrial F1 complex, epsilon subunit	72	72	23	52	9	0.722222	0.332389	0.745504
GATCACTTCTGAATAAG	s	Th	1	ATP5F1	515	ATP synthase, H+ transporting, mitochondrial F0 complex, subunit B1	27	27	1	128	20	4.74074	6.79683e-06	0.0388462
GATCATTGGCTATGCCA	s	Th	1	ATP5G1	516	ATP synthase, H+ transporting, mitochondrial F0 complex, subunit C1 (subunit 9)	67	67	4	36	3	0.537313	0.0757825	0.423838
GATCAGATGACCATTGA	s	Th	1	ATP5H	10476	ATP synthase, H+ transporting, mitochondrial F0 complex, subunit d	156	156	16	85	3	0.544872	0.0110269	0.176129
GATCTTGATGCGGGACT	s	Th	1	ATP5J2	9551	ATP synthase, H+ transporting, mitochondrial F0 complex, subunit F2	134	134	27	85	7	0.634328	0.065014	0.415605
GATCTCAGCCTGCTTCC	s	Th	1	ATP5J2	9551	ATP synthase, H+ transporting, mitochondrial F0 complex, subunit F2	0	0.9	0	5	5	5.55556	0.147326	0.686951
GATCAGACTGCTATCTG	s	Th	1	ATP5L	10632	ATP synthase, H+ transporting, mitochondrial F0 complex, subunit G	61	61	22	90	12	1.47541	0.185616	0.675915
GATCCGTCAATCTTGGG	s	T	1	ATP5O	539	ATP synthase, H+ transporting, mitochondrial F1 complex, O subunit (oligomycin sensitivity conferring protein)	317	317	4	631	49	1.99054	4.76682e-08	0.0343782
GATCCCTCCTGGGATGA	s	Th	5	ATP5O	539	ATP synthase, H+ transporting, mitochondrial F1 complex, O subunit (oligomycin sensitivity conferring protein)	0	0.9	0	15	4	16.6667	0.021955	0.383968
GATCAATTTGCTTGCTG	s	T	4	ATP5O	539	ATP synthase, H+ transporting, mitochondrial F1 complex, O subunit (oligomycin sensitivity conferring protein)	13	13	1	0	0	0	0.0586249	0.399179
GATCCAGTTCTAAGTGT	s	T	1	ATP5O	539	ATP synthase, H+ transporting, mitochondrial F1 complex, O subunit (oligomycin sensitivity conferring protein)	61	61	14	100	5	1.63934	0.118339	0.604157
GATCGCCGGCTGTTTGG	s	T	1	ATP6AP1	537	ATPase, H+ transporting, lysosomal accessory protein 1	274	274	1	375	95	1.36861	0.036612	0.399026
GATCCTCAGCCTCAAGA	s	T	4	ATP6AP1	537	ATPase, H+ transporting, lysosomal accessory protein 1	12	12	5	0	0	0	0.0586249	0.399179
GATCGCCTTGGCCTTGG	s	Th	4	ATP6AP2	10159	ATPase, H+ transporting, lysosomal accessory protein 2	31	31	20	0	0	0	0.0020268	0.121827
GATCCTTGTTGACGCTC	s	T	4	ATP6AP2	10159	ATPase, H+ transporting, lysosomal accessory protein 2	10	10	4	0	0	0	0.101495	0.433224
GATCTTTGCTCTGTTTC	s	T	1	ATP6V0A1	535	ATPase, H+ transporting, lysosomal V0 subunit a1	149	149	9	78	13	0.52349	0.0123003	0.170425
GATCTTTGGCAGCGCCA	s	T	1	ATP6V0B	533	ATPase, H+ transporting, lysosomal 21kDa, V0 subunit b	388	388	44	355	35	0.914948	0.533378	0.789204
GATCTGGCCTGTTCCTG	s	Th	1	ATP6V0C	527	ATPase, H+ transporting, lysosomal 16kDa, V0 subunit c	1476	1476	144	777	35	0.526423	2.22045e-16	0.0343782
GATCCTGATTCTCATCT	s	T	1	ATP6V0C	527	ATPase, H+ transporting, lysosomal 16kDa, V0 subunit c	43	43	2	9	2	0.209302	0.0226283	0.213242
GATCGCTGAATGTATCG	s	Th	1	ATP6V0D1	9114	ATPase, H+ transporting, lysosomal 38kDa, V0 subunit d1	206	206	12	85	3	0.412621	8.20478e-05	0.043986
GATCCGAGTGAGGCGAC	s	T	1	ATP6V0E1	8992	ATPase, H+ transporting, lysosomal 9kDa, V0 subunit e1	13	13	11	98	12	7.53846	8.60426e-06	0.0343782
GATCTGGTATGGGTGGG	s	T	4	ATP6V0E2	155066	ATPase, H+ transporting V0 subunit e2	8	8	5	0	0	0	0.101495	0.618326
GATCATCACCATGCTGG	s	Th	1	ATP6V0E2	155066	ATPase, H+ transporting V0 subunit e2	316	316	5	282	18	0.892405	0.444492	0.762149
GATCTTCTATGCAGTTC	s	T	1	ATP6V1B2	526	ATPase, H+ transporting, lysosomal 56/58kDa, V1 subunit B2	156	156	10	39	18	0.25	1.65149e-05	0.0343782
GATCAGGTCTGTAAATG	s	T	1	ATP6V1C1	528	ATPase, H+ transporting, lysosomal 42kDa, V1 subunit C1	7	7	4	0	0	0	0.181179	0.618326
GATCAGTAGTGTCAGCC	s	Th	1	ATP6V1D	51382	ATPase, H+ transporting, lysosomal 34kDa, V1 subunit D	44	44	2	11	12	0.25	0.024163	0.172371
GATCTGCTTACCAAGCA	s	T	3	ATP6V1D	51382	ATPase, H+ transporting, lysosomal 34kDa, V1 subunit D	18	18	6	0	0	0	0.0205587	0.231134
GATCAGGACCCACCTCC	s	Th	1	ATP6V1E1	529	ATPase, H+ transporting, lysosomal 31kDa, V1 subunit E1	686	686	75	156	17	0.227405	0	0.0343782
GATCTCTCAGCCAAGCA	s	Th	1	ATP6V1E2	90423	ATPase, H+ transporting, lysosomal 31kDa, V1 subunit E2	0	0.9	0	15	16	16.6667	0.021955	0.383968
GATCCCCTCCAAGGAGC	s	Th	1	ATP6V1F	9296	ATPase, H+ transporting, lysosomal 14kDa, V1 subunit F	389	389	18	369	34	0.948586	0.687099	0.83318
GATCCCCAAGTCTTAGC	s	Th	1	ATP6V1H	51606	ATPase, H+ transporting, lysosomal 50/57kDa, V1 subunit H	389	389	19	67	0	0.172237	0	0.0343782
GATCCAGGCCAATGCAT	s	Th	1	ATP8A1	10396	ATPase, aminophospholipid transporter (APLT), class I, type 8A, member 1	209	209	14	107	10	0.511962	0.00158895	0.0952547
GATCTGCATGCCTGACT	s	Th	5	ATP8A1	10396	ATPase, aminophospholipid transporter (APLT), class I, type 8A, member 1	12	12	4	0	0	0	0.0509456	0.399179
GATCCATGTCGGCTCTG	s	T	3	ATP8B2	57198	ATPase, class I, type 8B, member 2	41	41	17	13	5	0.317073	0.0505749	0.373521
GATCTCTCCGACACGGT	s	Th	4	ATP8B2	57198	ATPase, class I, type 8B, member 2	3	3	3	15	13	5	0.0904397	0.606819
GATCTTTCGTGTTTCTG	s	T	1	ATP9A	10079	ATPase, class II, type 9A	249	249	7	78	13	0.313253	6.67144e-07	0.0343782
GATCACCGTGGTCAGCT	s	T	2	ATP9B	374868	ATPase, class II, type 9B	38	38	17	43	7	1.13158	0.783527	0.860509
GATCGGAAAGAGACCTA	s	Th	1	ATPAF1	64756	ATP synthase mitochondrial F1 complex assembly factor 1	120	120	1	82	89	0.683333	0.11972	0.615561
GATCCAGAAGTGGGGCA	s	T	1	ATPAF2	91647	ATP synthase mitochondrial F1 complex assembly factor 2	7	7	6	0	0	0	0.181179	0.618326
GATCGGCCCGCCGGGCT	s	Th	2	ATPBD1B	54707	ATP binding domain 1 family, member B	6	6	6	0	0	0	0.167517	0.678357
GATCAGTCAGATGAAGA	s	Th	2	ATPBD1C	51184	ATP binding domain 1 family, member C	0	0.9	0	5	5	5.55556	0.147326	0.686951
GATCTGATGCCGCGGGG	s	T	1	ATPBD3	90353	ATP binding domain 3	0	0.9	0	20	2	22.2222	0.00957784	0.22588
GATCCTCTTGAAAACTA	s	T	5	ATRNL1	26033	Attractin-like 1	13	13	3	0	0	0	0.0586249	0.399179
GATCACCTTTCACGTAC	s	T	1	ATRNL1	26033	Attractin-like 1	7	7	0	6	6	0.857143	0.910701	0.853335
GATCCACGCCCCTCTCC	s	T	2	ATRX	546	Alpha thalassemia/mental retardation syndrome X-linked (RAD54 homolog, S. cerevisiae)	41	41	7	9	9	0.219512	0.0226283	0.228133
GATCATTACCCACCATA	s	Th	1	ATXN1	6310	Ataxin 1	12	12	4	69	1	5.75	0.000427211	0.0926416
GATCCTGAAATCTACTA	s	T	1	ATXN10	25814	Ataxin 10	25	25	24	0	0	0	0.00748908	0.161136
GATCCTGGACAACTGCA	s	Th	1	ATXN10	25814	Ataxin 10	25	25	7	0	0	0	0.00577204	0.161136
GATCCATCCTTCTCACG	s	Th	4	ATXN2	6311	Ataxin 2	9	9	6	7	7	0.777778	0.694362	0.856964
GATCACTGTCTACAGTG	s	Th	1	ATXN2	6311	Ataxin 2	41	41	5	38	5	0.926829	0.937504	0.860676
GATCTATGTCTCTTCCC	s	Th	4	ATXN2L	11273	Ataxin 2-like	5	5	1	5	5	1	0.961189	0.883973
GATCTCAGCAGGCCTCT	s	Th	1	ATXN7L3	56970	Ataxin 7-like 3	67	67	7	0	0	0	4.70449e-06	0.0343782
GATCTGTCTCTCCTGAC	s	Th	4	AUH	549	AU RNA binding protein/enoyl-Coenzyme A hydratase	17	17	1	0	0	0	0.0168196	0.231134
GATCACAGTGTCAGGGT	s	Th	1	AUP1	550	Ancient ubiquitous protein 1	83	83	8	143	13	1.72289	0.0261977	0.385586
GATCAAGTCTGGGAACA	s	Th	1	AUTS2	26053	Autism susceptibility candidate 2	44	44	2	43	0	0.977273	0.947312	0.86071
GATCAGACGTCTCAGGA	s	Th	1	AVEN	57099	Apoptosis, caspase activation inhibitor	8	8	8	0	0	0	0.0909465	0.618326
GATCAGGGCGTGGAGCT	s	Th	3	AVIL	10677	Advillin	0	0.9	0	8	2	8.88889	0.0759457	0.636774
GATCCAGGGAAAGAGCC	s	T	1	AVPI1	60370	Arginine vasopressin-induced 1	76	76	3	0	0	0	5.77894e-06	0.0343782
GATCTACTTTCCCTCTG	s	T	1	AXIN1	8312	Axin 1	20	20	1	6	5	0.3	0.208452	0.599606
GATCCTGTGACTGAGGC	s	T	1	AXIN2	8313	Axin 2 (conductin, axil)	46	46	5	32	9	0.695652	0.438168	0.791901
GATCCAAGCTAAGCACT	s	Th	1	AXL	558	AXL receptor tyrosine kinase	8	8	5	0	0	0	0.0909465	0.618326
GATCTATGTCTGCTGCC	s	Th	1	AXUD1	64651	AXIN1 up-regulated 1	84	84	0	79	10	0.940476	0.805324	0.858909
GATCCCATTGCTTTCCT	s	Th	1	AYTL1	54947	Acyltransferase like 1	5	5	1	0	0	0	0.167517	0.678357
GATCCACAGCCTGGCAG	s	T	1	AYTL2	79888	Acyltransferase like 2	189	189	22	221	8	1.16931	0.376458	0.811392
GATCCACAAGGCCTGAG	s	T	1	AZGP1	563	Alpha-2-glycoprotein 1, zinc-binding	17	17	3	30	7	1.76471	0.300409	0.773915
GATCCGCCAGGAGTTCG	s	T	3	AZI1	22994	5-azacytidine induced 1	18	18	4	130	19	7.22222	9.82469e-07	0.0343782
GATCTGAAGTTGCAGGT	s	Th	1	AZIN1	51582	Antizyme inhibitor 1	30	30	1	20	2	0.666667	0.366534	0.793096
GATCGAGACATGTAAGC	s	Th	1	B2M	567	Beta-2-microglobulin	11	11	2	0	0	0	0.0509456	0.433224
GATCTCCTCTCCCCACC	s	Th	4	B2M	567	Beta-2-microglobulin	0	0.9	0	5	5	5.55556	0.147326	0.686951
GATCTATGCCCTTGTTA	s	Th	1	B3GALNT1	8706	Beta-1,3-N-acetylgalactosaminyltransferase 1 (globoside blood group)	5	5	5	0	0	0	0.167517	0.678357
GATCTACAAGGTCCCTT	s	T	1	B3GALNT2	148789	Beta-1,3-N-acetylgalactosaminyltransferase 2	28	28	13	13	2	0.464286	0.235325	0.657715
GATCCTCAGTCTCACTA	s	T	1	B3GALT4	8705	UDP-Gal:betaGlcNAc beta 1,3-galactosyltransferase, polypeptide 4	0	0.9	0	4	4	4.44444	0.290216	0.686951
GATCAGGCAATTTCTCT	s	T	1	B3GALTL	145173	Beta 1,3-galactosyltransferase-like	0	0.9	0	28	6	31.1111	0.00277623	0.156764
GATCCCAACAGGCACCC	s	Th	5	B3GAT1	27087	Beta-1,3-glucuronyltransferase 1 (glucuronosyltransferase P)	9	9	3	0	0	0	0.0909465	0.433224
GATCCCTGAGCCACCTT	s	T	1	B3GAT1	27087	Beta-1,3-glucuronyltransferase 1 (glucuronosyltransferase P)	307	307	19	312	44	1.01629	0.94537	0.861756
GATCTATGAACAGCTTG	s	T	1	B3GAT2	135152	Beta-1,3-glucuronyltransferase 2 (glucuronosyltransferase S)	5	5	1	0	0	0	0.181179	0.678357
GATCTGAGGATTTCCCA	s	T	1	B3GAT3	26229	Beta-1,3-glucuronyltransferase 3 (glucuronosyltransferase I)	0	0.9	0	4	4	4.44444	0.290216	0.686951
GATCCCAAGGACCTGGA	s	Th	1	B3GAT3	26229	Beta-1,3-glucuronyltransferase 3 (glucuronosyltransferase I)	173	173	11	171	0	0.988439	0.894847	0.860718
GATCTGTCCCTTCAACG	s	Th	1	B3GNT1	11041	UDP-GlcNAc:betaGal beta-1,3-N-acetylglucosaminyltransferase 1	530	530	29	115	17	0.216981	0	0.0343782
GATCCGCTCCCCCAGCC	s	T	1	B3GNT4	79369	UDP-GlcNAc:betaGal beta-1,3-N-acetylglucosaminyltransferase 4	2	2	2	17	16	8.5	0.0762406	0.428561
GATCAGACAGGGGCAGC	s	Th	1	B3GNTL1	146712	UDP-GlcNAc:betaGal beta-1,3-N-acetylglucosaminyltransferase-like 1	30	30	12	3	4	0.1	0.00844528	0.170127
GATCTCAGTTCAAATGC	s	Th	1	B4GALNT1	2583	Beta-1,4-N-acetyl-galactosaminyl transferase 1	25	25	4	0	0	0	0.00577204	0.161136
GATCCAGGAAGAAGTGG	s	T	4	B4GALNT1	2583	Beta-1,4-N-acetyl-galactosaminyl transferase 1	7	7	3	22	15	3.14286	0.115244	0.640819
GATCGGCTACGGGCTCT	s	T	2	B4GALNT1	2583	Beta-1,4-N-acetyl-galactosaminyl transferase 1	5	5	5	0	0	0	0.181179	0.678357
GATCTACAAGTCGGACT	s	Th	3	B4GALNT4	338707	Beta-1,4-N-acetyl-galactosaminyl transferase 4	95	95	21	113	1	1.18947	0.490061	0.840865
GATCAGTAAGTCTGGTT	s	Th	3	B4GALT2	8704	UDP-Gal:betaGlcNAc beta 1,4- galactosyltransferase, polypeptide 2	87	87	9	154	11	1.77011	0.0161532	0.369511
GATCTGGCTTCTCCTCG	s	Th	1	B4GALT3	8703	UDP-Gal:betaGlcNAc beta 1,4- galactosyltransferase, polypeptide 3	87	87	19	108	8	1.24138	0.406288	0.820346
GATCCTCTACCACAGAC	s	T	4	B4GALT5	9334	UDP-Gal:betaGlcNAc beta 1,4- galactosyltransferase, polypeptide 5	60	60	2	0	0	0	6.03743e-05	0.0388462
GATCCGGCACCACATCT	s	T	4	B4GALT7	11285	Xylosylprotein beta 1,4-galactosyltransferase, polypeptide 7 (galactosyltransferase I)	5	5	5	0	0	0	0.181179	0.678357
GATCGTGCTCAGCGTGT	s	Th	1	B9D1	27077	B9 protein domain 1	67	67	5	3	3	0.0447761	2.01395e-05	0.0388462
GATCGGCCTGCTGCTCC	s	Th	2	B9D2	80776	B9 protein domain 2	25	25	12	0	0	0	0.00577204	0.161136
GATCTGGCCCTCCCCAG	s	Th	1	BAALC	79870	Brain and acute leukemia, cytoplasmic	222	222	20	376	12	1.69369	0.000371574	0.0934922
GATCCCATCAAAGAACC	s	Th	1	BAALC	79870	Brain and acute leukemia, cytoplasmic	45	45	3	10	1	0.222222	0.00640931	0.172371
GATCCAGAGACATGTGG	s	Th	1	BAALC	79870	Brain and acute leukemia, cytoplasmic	116	116	8	143	30	1.23276	0.318741	0.794095
GATCGGGCCCGAAAACG	s	Th	2	BACE1	23621	Beta-site APP-cleaving enzyme 1	27	27	2	23	8	0.851852	0.687073	0.851613
GATCCTGCTTCTCAGTG	s	T	5	BACH1	571	BTB and CNC homology 1, basic leucine zipper transcription factor 1	0	0.9	0	4	4	4.44444	0.290216	0.686951
GATCCGTGCTGTCTCCT	s	T	1	BAD	572	BCL2-antagonist of cell death	242	242	4	215	10	0.88843	0.502308	0.780822
GATCCTCTCTCGACTTC	s	T	1	BAG1	573	BCL2-associated athanogene	0	0.9	0	26	3	28.8889	0.0051375	0.169253
GATCCTGCCAGAAAATT	s	T	1	BAG1	573	BCL2-associated athanogene	48	48	3	19	3	0.395833	0.0467196	0.407166
GATCCCCACACAGAAAC	s	T	1	BAG3	9531	BCL2-associated athanogene 3	61	61	1	227	10	3.72131	1.94313e-07	0.0343782
GATCATTTTGTCAAAGT	s	Th	1	BAG4	9530	BCL2-associated athanogene 4	8	8	2	0	0	0	0.0909465	0.618326
GATCAAGTGGTTCTCCT	s	Th	5	BAGE	574	B melanoma antigen	5	5	2	0	0	0	0.167517	0.678357
GATCCTCTGCTCCGCCG	s	T	1	BAHCC1	57597	BAH domain and coiled-coil containing 1	48	48	13	158	24	3.29167	3.96505e-05	0.0406889
GATCCCAGGTCCTCCCA	s	T	5	BAHCC1	57597	BAH domain and coiled-coil containing 1	0	0.9	0	17	9	18.8889	0.0180309	0.238835
GATCCTGCCCACGGCCA	s	T	5	BAI1	575	Brain-specific angiogenesis inhibitor 1	10	10	3	111	23	11.1	4.91885e-07	0.0343782
GATCCCGCTGGTGGGCC	s	Th	2	BAI1	575	Brain-specific angiogenesis inhibitor 1	745	745	37	1511	10	2.02819	0	0.0343782
GATCAGTGCTGAACAAG	s	Th	4	BAI1	575	Brain-specific angiogenesis inhibitor 1	6	6	3	0	0	0	0.167517	0.678357
GATCTCTCCAGAATCCC	s	Th	1	BAI2	576	Brain-specific angiogenesis inhibitor 2	47	47	5	71	24	1.51064	0.193886	0.748948
GATCCTGAGAAATGTGA	s	T	5	BAI3	577	Brain-specific angiogenesis inhibitor 3	7	7	3	0	0	0	0.181179	0.618326
GATCCCCCAGGGTCCAT	s	T	2	BAIAP2	10458	BAI1-associated protein 2	28	28	27	132	16	4.71429	1.04611e-05	0.0343782
GATCTGCATGGACTCCG	s	Th	2	BAIAP2	10458	BAI1-associated protein 2	133	133	12	0	0	0	1.56045e-10	0.0343782
GATCCCAGCTGTTCTAG	s	Th	1	BAIAP2	10458	BAI1-associated protein 2	23	23	16	10	11	0.434783	0.153488	0.676016
GATCCAAGAAGCGGGTC	s	T	1	BAIAP2L2	80115	BAI1-associated protein 2-like 2	13	13	4	4	4	0.307692	0.223086	0.753392
GATCTGCGCTGAGGAGG	s	T	3	BAIAP3	8938	BAI1-associated protein 3	332	332	13	110	10	0.331325	3.59105e-08	0.0343782
GATCCCAGCCTCGGCCT	s	Th	4	BAIAP3	8938	BAI1-associated protein 3	0	0.9	0	18	20	20	0.0120792	0.238835
GATCCGGCTTCCTGTCC	s	T	4	BAIAP3	8938	BAI1-associated protein 3	2	2	2	4	4	2	0.93679	0.848303
GATCCTCCCTCATGGCT	s	Th	1	BAK1	578	BCL2-antagonist/killer 1	0	0.9	0	34	6	37.7778	0.000678084	0.096944
GATCCTCTCGCTTGTTC	s	T	1	BAMBI	25805	BMP and activin membrane-bound inhibitor homolog (Xenopus laevis)	3	3	3	32	5	10.6667	0.0067051	0.167768
GATCAATAAAGTCAGTG	s	Th	1	BANF1	8815	Barrier to autointegration factor 1	94	94	0	0	0	0	9.02585e-08	0.0343782
GATCGCCGTGGCCTCCT	s	T	2	BANP	54971	BTG3 associated nuclear protein	48	48	10	0	0	0	0.000250387	0.0512997
GATCCTGACGGGGTGGA	s	T	2	BANP	54971	BTG3 associated nuclear protein	35	35	0	0	0	0	0.00171353	0.0929818
GATCAGCCCCATAGTGC	s	Th	3	BAP1	8314	BRCA1 associated protein-1 (ubiquitin carboxy-terminal hydrolase)	6	6	6	0	0	0	0.167517	0.678357
GATCAGCGCTTCTGCAC	s	Th	3	BARD1	580	BRCA1 associated RING domain 1	0	0.9	0	18	3	20	0.0120792	0.238835
GATCTCAATGCCAATCC	s	Th	1	BASP1	10409	Brain abundant, membrane attached signal protein 1	716	716	10	216	13	0.301676	0	0.0343782
GATCCGCGTCTGAAAGT	s	T	5	BASP1	10409	Brain abundant, membrane attached signal protein 1	8	8	9	0	0	0	0.101495	0.618326
GATCGCTTTGAGGTCAA	s	Th	2	BAT1	7919	HLA-B associated transcript 1	0	0.9	0	38	41	42.2222	0.000386126	0.0922803
GATCTCATCCTCATCTC	s	Th	5	BAT1	7919	HLA-B associated transcript 1	5	5	2	0	0	0	0.167517	0.678357
GATCCTCAATGATGTGC	s	T	4	BAT1	7919	HLA-B associated transcript 1	0	0.9	0	4	4	4.44444	0.290216	0.686951
GATCATCACGGACTCCC	s	T	1	BAT2	7916	HLA-B associated transcript 2	441	441	1	709	62	1.60771	2.25797e-05	0.0406889
GATCGACAGGCAGTACC	s	Th	3	BAT2D1	23215	BAT2 domain containing 1	0	0.9	0	107	20	118.889	3.96513e-09	0.0343782
GATCAGCTCCTTCATCA	s	Th	3	BAT2D1	23215	BAT2 domain containing 1	14	14	4	0	0	0	0.0290848	0.372717
GATCAAAACCGAAGAAA	s	Th	1	BAT2D1	23215	BAT2 domain containing 1	0	0.9	0	13	14	14.4444	0.0404366	0.404659
GATCCAGCAAGCACAGT	s	Th	4	BAT2D1	23215	BAT2 domain containing 1	0	0.9	0	13	2	14.4444	0.0404366	0.404659
GATCAAGGTTCAAAAGC	s	Th	4	BAT2D1	23215	BAT2 domain containing 1	6	6	6	15	16	2.5	0.23068	0.688636
GATCCTTAGCTCTTTCT	s	T	1	BAT3	7917	HLA-B associated transcript 3	23	23	4	0	0	0	0.0123649	0.173524
GATCCTTAGCTCTTTGC	s	T	1	BAT3	7917	HLA-B associated transcript 3	30	30	29	46	1	1.53333	0.263914	0.779853
GATCCTGAAGTTTTTGG	s	Th	1	BAT4	7918	HLA-B associated transcript 4	8	8	5	0	0	0	0.0909465	0.618326
GATCATCACCACCACGG	s	Th	1	BAT5	7920	HLA-B associated transcript 5	48	48	3	56	8	1.16667	0.753592	0.858361
GATCCAAGACCAGGGTG	s	Th	1	BAX	581	BCL2-associated X protein	8	8	5	115	14	14.375	9.17356e-08	0.0343782
GATCCCGCCTCTGCCTG	s	T	1	BAX	581	BCL2-associated X protein	3	3	3	11	11	3.66667	0.265396	0.734393
GATCTGGCCAGAGGGGT	s	T	1	BAZ1B	9031	Bromodomain adjacent to zinc finger domain, 1B	50	50	18	152	37	3.04	9.63554e-05	0.0545859
GATCTTGGCAGAGTAAA	s	Th	4	BAZ1B	9031	Bromodomain adjacent to zinc finger domain, 1B	9	9	0	0	0	0	0.0909465	0.433224
GATCCCCAGACAGGAAG	s	T	4	BAZ1B	9031	Bromodomain adjacent to zinc finger domain, 1B	5	5	5	0	0	0	0.181179	0.678357
GATCATGGAGGAGACCA	s	T	4	BAZ2A	11176	Bromodomain adjacent to zinc finger domain, 2A	13	13	4	0	0	0	0.0586249	0.399179
GATCTGGGAGAAGAGCA	s	Th	3	BAZ2B	29994	Bromodomain adjacent to zinc finger domain, 2B	20	20	21	0	0	0	0.00981802	0.216203
GATCGTTACAGACGCCG	s	Th	3	BAZ2B	29994	Bromodomain adjacent to zinc finger domain, 2B	9	9	3	36	7	4	0.0257616	0.395914
GATCCTCTGGTATGATG	s	T	4	BBOX1	8424	Butyrobetaine (gamma), 2-oxoglutarate dioxygenase (gamma-butyrobetaine hydroxylase) 1	7	7	4	22	23	3.14286	0.115244	0.640819
GATCACACAGCAGCTGC	s	Th	1	BBS1	582	Bardet-Biedl syndrome 1	9	9	9	0	0	0	0.0909465	0.433224
GATCTCGGCCAACTAGG	s	Th	4	BBS1	582	Bardet-Biedl syndrome 1	0	0.9	0	8	2	8.88889	0.0759457	0.636774
GATCACACCCTGGTGAA	s	Th	1	BBS2	583	Bardet-Biedl syndrome 2	80	80	1	128	3	1.6	0.0704224	0.598744
GATCAGCACCAACGATT	s	T	1	BBS4	585	Bardet-Biedl syndrome 4	7	7	6	0	0	0	0.181179	0.618326
GATCCTCAGGTTGTGAG	s	T	4	BBS4	585	Bardet-Biedl syndrome 4	5	5	5	0	0	0	0.181179	0.678357
GATCTCCGCTCGCTACA	s	T	2	BBS5	129880	Bardet-Biedl syndrome 5	13	13	14	0	0	0	0.0586249	0.399179
GATCATGTAAGAGAAGC	s	T	1	BBS7	55212	Bardet-Biedl syndrome 7	10	10	10	0	0	0	0.101495	0.433224
GATCCTACTCAAATGGG	s	Th	4	BBX	56987	Bobby sox homolog (Drosophila)	5	5	5	0	0	0	0.167517	0.678357
GATCCTGGAGCTTTGCT	s	T	1	BBX	56987	Bobby sox homolog (Drosophila)	28	28	1	26	1	0.928571	0.782178	0.860415
GATCTCAGGGAAGCCTG	s	Th	1	BCAN	63827	Brevican	109	109	19	0	0	0	7.76245e-09	0.0343782
GATCCCCCCTTCCAGCC	s	T	1	BCAN	63827	Brevican	18	18	1	317	17	17.6111	0	0.0343782
GATCTTCCATCAGGGCC	s	T	1	BCAN	63827	Brevican	362	362	71	7603	565	21.0028	0	0.0343782
GATCTTCCATCAGGGCG	s	Th	2	BCAN	63827	Brevican	0	0.9	0	34	37	37.7778	0.000678084	0.096944
GATCCCAGCCCCGCCAC	s	Th	5	BCAN	63827	Brevican	0	0.9	0	31	34	34.4444	0.00119467	0.127163
GATCAGACCGTGAGGTA	s	Th	4	BCAN	63827	Brevican	122	122	20	156	19	1.27869	0.233179	0.773794
GATCCTCCCACCTCCCT	s	T	5	BCAN	63827	Brevican	443	443	36	486	178	1.09707	0.466333	0.843151
GATCAGAGTTATCCACT	s	Th	3	BCAP29	55973	B-cell receptor-associated protein 29	9	9	10	0	0	0	0.0909465	0.433224
GATCCCCCAGATACCGC	s	T	1	BCAP29	55973	B-cell receptor-associated protein 29	53	53	9	37	1	0.698113	0.372056	0.774127
GATCCAGGCTAGAGGCA	s	Th	2	BCAS1	8537	Breast carcinoma amplified sequence 1	11	11	1	0	0	0	0.0509456	0.433224
GATCCCACGCTTCTCCC	s	Th	4	BCAS1	8537	Breast carcinoma amplified sequence 1	5	5	1	0	0	0	0.167517	0.678357
GATCAGTGAAGGAAACC	s	Th	1	BCAS3	54828	Breast carcinoma amplified sequence 3	42	42	6	11	7	0.261905	0.024163	0.213242
GATCCACCCCCTGCCCG	s	T	5	BCAS4	55653	Breast carcinoma amplified sequence 4	28	28	1	0	0	0	0.00456115	0.129606
GATCCGCAGGGCTCCCC	s	T	3	BCAS4	55653	Breast carcinoma amplified sequence 4	0	0.9	0	7	4	7.77778	0.134721	0.636774
GATCATCCGCAGGCTAT	s	T	1	BCAT1	586	Branched chain aminotransferase 1, cytosolic	108	108	1	78	20	0.722222	0.221127	0.666622
GATCTCTCCGTTCTCAG	s	Th	1	BCAT2	587	Branched chain aminotransferase 2, mitochondrial	22	22	4	52	30	2.36364	0.046162	0.425054
GATCCCCCAGTCCAGCG	s	T	4	BCCIP	56647	BRCA2 and CDKN1A interacting protein	43	43	5	0	0	0	0.000651958	0.0620318
GATCGCTCTGCCCATGT	s	Th	1	BCCIP	56647	BRCA2 and CDKN1A interacting protein	25	25	1	0	0	0	0.00577204	0.161136
GATCACACTGCATCCTA	s	Th	4	BCCIP	56647	BRCA2 and CDKN1A interacting protein	8	8	8	0	0	0	0.0909465	0.618326
GATCAAGAGGAAACTCT	s	Th	5	BCCIP	56647	BRCA2 and CDKN1A interacting protein	6	6	0	0	0	0	0.167517	0.678357
GATCACTCCCAACCAGA	s	Th	1	BCDO2	83875	Beta-carotene dioxygenase 2	5	5	5	3	0	0.6	0.592387	0.844415
GATCGTGAGCGGAAACC	s	T	1	BCKDHA	593	Branched chain keto acid dehydrogenase E1, alpha polypeptide	12	12	1	0	0	0	0.0586249	0.399179
GATCTGACCCCACAGCC	s	T	1	BCKDK	10295	Branched chain ketoacid dehydrogenase kinase	61	61	17	126	5	2.06557	0.0134357	0.213171
GATCCTGGCGCTCGGGC	s	T	4	BCKDK	10295	Branched chain ketoacid dehydrogenase kinase	0	0.9	0	4	4	4.44444	0.290216	0.686951
GATCTCGGGGCGCAGCG	s	Th	1	BCL11A	53335	B-cell CLL/lymphoma 11A (zinc finger protein)	27	27	28	0	0	0	0.00341255	0.129606
GATCATGACCTCCTCAC	s	T	2	BCL11A	53335	B-cell CLL/lymphoma 11A (zinc finger protein)	17	17	6	0	0	0	0.0344982	0.231134
GATCCCGAGAGAGAGGC	s	Th	2	BCL11B	64919	B-cell CLL/lymphoma 11B (zinc finger protein)	9	9	3	0	0	0	0.0909465	0.433224
GATCCTGGCGGCTGCCG	s	Th	4	BCL6	604	B-cell CLL/lymphoma 6 (zinc finger protein 51)	0	0.9	0	46	4	51.1111	0.000126201	0.0620318
GATCCTTGGAATAAAGA	s	T	1	BCL6B	255877	B-cell CLL/lymphoma 6, member B (zinc finger protein)	0	0.9	0	19	11	21.1111	0.0180309	0.22588
GATCCCGAGCAAAAGCC	s	Th	1	BCL7A	605	B-cell CLL/lymphoma 7A	9	9	0	121	27	13.4444	3.1827e-08	0.0343782
GATCGCAGTGGTCAGAA	s	Th	5	BCL7A	605	B-cell CLL/lymphoma 7A	9	9	10	0	0	0	0.0909465	0.433224
GATCCTGGAGGAGCCCT	s	T	1	BCL7B	9275	B-cell CLL/lymphoma 7B	56	56	1	80	22	1.42857	0.249264	0.741358
GATCCCGGGGGCATAAC	s	Th	1	BCL7C	9274	B-cell CLL/lymphoma 7C	56	56	1	389	38	6.94643	0	0.0343782
GATCCCCCCACAGATGA	s	Th	5	BCL9	607	B-cell CLL/lymphoma 9	0	0.9	0	49	3	54.4444	7.2386e-05	0.0512997
GATCATCCCCTCTGAGA	s	Th	4	BCL9L	283149	B-cell CLL/lymphoma 9-like	36	36	10	0	0	0	0.000722659	0.0929818
GATCTGTCTGTGCCCAC	s	Th	4	BCL9L	283149	B-cell CLL/lymphoma 9-like	123	123	7	105	18	0.853659	0.461318	0.805129
GATCTTCATCCTCTTCA	s	T	1	BCLAF1	9774	BCL2-associated transcription factor 1	38	38	13	0	0	0	0.00105553	0.073078
GATCCAGTCCTTCTAAG	s	T	1	BCMO1	53630	Beta-carotene 15,15'-monooxygenase 1	5	5	5	0	0	0	0.181179	0.678357
GATCTGGCCTCAGACAA	s	Th	1	BCOR	54880	BCL6 co-repressor	70	70	5	8	9	0.114286	0.000145037	0.0444611
GATCTTCCTGTGGAGAA	s	T	4	BCOR	54880	BCL6 co-repressor	23	23	1	0	0	0	0.0123649	0.173524
GATCCCCAGCCAAAAAT	s	T	4	BCORL1	63035	BCL6 co-repressor-like 1	0	0.9	0	15	15	16.6667	0.034404	0.383968
GATCTGAGGGGTGAGGG	s	T	3	BCORL1	63035	BCL6 co-repressor-like 1	8	8	2	0	0	0	0.101495	0.618326
GATCCCGCCCAGGTCTG	s	Th	1	BCR	613	Breakpoint cluster region	2	2	2	30	4	15	0.00911982	0.175846
GATCACTTGTCAAGATG	s	Th	1	BCR	613	Breakpoint cluster region	47	47	11	30	2	0.638298	0.268756	0.713654
GATCAGGCTGGGCTCAG	s	Th	1	BCS1L	617	BCS1-like (yeast)	27	27	26	0	0	0	0.00341255	0.129606
GATCCCTGGTGGAAGGG	s	T	2	BDH1	622	3-hydroxybutyrate dehydrogenase, type 1	5	5	5	0	0	0	0.181179	0.678357
GATCCACTGAGCAAAGC	s	T	4	BDNF	627	Brain-derived neurotrophic factor	7	7	0	0	0	0	0.181179	0.618326
GATCTGTGTTACTGAGG	s	T	4	BDP1	55814	B double prime 1, subunit of RNA polymerase III transcription initiation factor IIIB	13	13	6	0	0	0	0.0586249	0.399179
GATCCAGTCACAGCCAT	s	T	1	BEST1	7439	Bestrophin 1	51	51	13	56	10	1.09804	0.894716	0.860869
GATCAGCCACAGCCTGA	s	Th	1	BET1L	51272	Blocked early in transport 1 homolog (S. cerevisiae)-like	12	12	7	15	13	1.25	0.684429	0.860689
GATCCCCCTCACCATGA	s	Th	1	BEX2	84707	Brain expressed X-linked 2	531	531	57	323	4	0.608286	8.42702e-05	0.0406889
GATCATACCCAGAATTC	s	Th	1	BEX4	56271	BEX family member 4	37	37	17	3	4	0.0810811	0.00303624	0.120621
GATCATCATGATGAGTT	s	Th	1	BEX5	340542	BEX family member 5	12	12	12	0	0	0	0.0509456	0.399179
GATCGTGGAGACCATGA	s	Th	1	BFSP1	631	Beaded filament structural protein 1, filensin	25	25	4	0	0	0	0.00577204	0.161136
GATCGAGAACGGGAGCC	s	Th	1	BGN	633	Biglycan	28	28	2	107	20	3.82143	0.000112418	0.0608019
GATCGTGTTTTAACTTT	s	Th	1	BHLHB2	8553	Basic helix-loop-helix domain containing, class B, 2	6	6	3	0	0	0	0.167517	0.678357
GATCCCCCCAAGGTCTC	s	T	3	BHLHB3	79365	Basic helix-loop-helix domain containing, class B, 3	55	55	16	0	0	0	9.68567e-05	0.0406889
GATCCTATGCGAAAGAC	s	T	1	BHLHB3	79365	Basic helix-loop-helix domain containing, class B, 3	30	30	8	6	6	0.2	0.053864	0.229374
GATCATTCTCAAAAGCG	s	Th	1	BICD2	23299	Bicaudal D homolog 2 (Drosophila)	12	12	0	10	11	0.833333	0.753745	0.858487
GATCCTCGCTGCTGCTG	s	T	1	BID	637	BH3 interacting domain death agonist	12	12	2	4	4	0.333333	0.223086	0.753392
GATCAGAGTCAACCACG	s	Th	1	BIN1	274	Bridging integrator 1	47	47	8	0	0	0	0.000156916	0.0512997
GATCCCCTTCCAGAACC	s	T	1	BIN1	274	Bridging integrator 1	1074	1074	15	802	33	0.746741	0.000798478	0.059695
GATCGCAGAGAACAACG	s	Th	4	BIN1	274	Bridging integrator 1	11	11	1	0	0	0	0.0509456	0.433224
GATCTTTGGAGACCTGT	s	T	2	BIN3	55909	Bridging integrator 3	50	50	1	7	8	0.14	0.00342538	0.0994113
GATCTTCTAAAGGCAGC	s	T	1	BIRC6	57448	Baculoviral IAP repeat-containing 6 (apollon)	25	25	3	0	0	0	0.00748908	0.161136
GATCCATCCATCTCTCT	s	T	1	BLCAP	10904	Bladder cancer associated protein	73	73	0	102	22	1.39726	0.212603	0.733871
GATCACAGGGTCGGGAG	s	Th	4	BLK	640	B lymphoid tyrosine kinase	84	84	19	0	0	0	3.95623e-07	0.0343782
GATCCAGTTCAGCCTCA	s	Th	1	BLM	641	Bloom syndrome	0	0.9	0	20	5	22.2222	0.0120792	0.22588
GATCGGAATGGTGGAGA	s	Th	1	BLOC1S1	2647	Biogenesis of lysosome-related organelles complex-1, subunit 1	72	72	9	198	3	2.75	1.23972e-05	0.0435195
GATCAGTTTGGGAAATG	s	Th	1	BLOC1S2	282991	Biogenesis of lysosome-related organelles complex-1, subunit 2	105	105	17	5	2	0.047619	2.11739e-07	0.0343782
GATCCTTTACAGAAAAA	s	T	1	BLZF1	8548	Basic leucine zipper nuclear factor 1 (JEM-1)	81	81	5	0	0	0	2.27489e-06	0.0343782
GATCCACAGGGGCTATC	s	T	1	BMF	90427	Bcl2 modifying factor	0	0.9	0	15	7	16.6667	0.034404	0.383968
GATCCAGGTGTCTGAGG	s	T	2	BMP1	649	Bone morphogenetic protein 1	8	8	2	46	12	5.75	0.00636678	0.160764
GATCAGCTTTTTATGGC	s	Th	1	BMP2K	55589	BMP2 inducible kinase	8	8	2	0	0	0	0.0909465	0.618326
GATCCCTCTTGGTGTGA	s	Th	1	BMP7	655	Bone morphogenetic protein 7 (osteogenic protein 1)	62	62	2	166	12	2.67742	0.000102224	0.0622268
GATCCTACAAGCTGTGC	s	Th	1	BMP7	655	Bone morphogenetic protein 7 (osteogenic protein 1)	75	75	13	72	14	0.96	0.8966	0.860753
GATCAGGTGCGGTGGCT	s	Th	2	BMP8B	656	Bone morphogenetic protein 8b (osteogenic protein 2)	0	0.9	0	11	11	12.2222	0.0404366	0.594545
GATCCTCCTGGTTCATA	s	T	5	BMP8B	656	Bone morphogenetic protein 8b (osteogenic protein 2)	0	0.9	0	6	2	6.66667	0.134721	0.686951
GATCCTAACCTGTAAGC	s	Th	1	BMPER	168667	BMP binding endothelial regulator	8	8	2	0	0	0	0.0909465	0.618326
GATCAAGAAACGTGTGA	s	Th	2	BMPR2	659	Bone morphogenetic protein receptor, type II (serine/threonine kinase)	30	30	4	0	0	0	0.0020268	0.121827
GATCTGCGGAGGTAGAC	s	T	1	BMS1	9790	BMS1 homolog, ribosome assembly protein (yeast)	55	55	9	32	5	0.581818	0.198623	0.651818
GATCTGGTGGAGGGAAG	s	Th	1	BNIP1	662	BCL2/adenovirus E1B 19kDa interacting protein 1	25	25	1	0	0	0	0.00577204	0.161136
GATCGCTTGAGACCAGC	s	Th	5	BNIP2	663	BCL2/adenovirus E1B 19kDa interacting protein 2	0	0.9	0	100	14	111.111	1.16666e-08	0.0343782
GATCAGTTTTCTGCTGA	s	Th	1	BNIP3	664	BCL2/adenovirus E1B 19kDa interacting protein 3	348	348	29	307	37	0.882184	0.365238	0.748958
GATCAGGTTAGCAAATG	s	Th	1	BNIP3L	665	BCL2/adenovirus E1B 19kDa interacting protein 3-like	14	14	1	21	3	1.5	0.508092	0.853211
GATCCTTCCACCTTGGA	s	T	1	BNIPL	149428	BCL2/adenovirus E1B 19kD interacting protein like	7	7	7	0	0	0	0.181179	0.618326
GATCACGAGGGGTCCCA	s	Th	2	BOC	91653	Boc homolog (mouse)	55	55	3	2	2	0.0363636	0.000147559	0.0510659
GATCCGGTGCTACGGGA	s	T	1	BOC	91653	Boc homolog (mouse)	3	3	3	6	5	2	0.49943	0.848303
GATCCCACTGGAGGGTA	s	T	1	BOK	666	BCL2-related ovarian killer	46	46	1	6	5	0.130435	0.00542857	0.0982267
GATCCGAATGGGCTGGG	s	T	1	BOLA1	51027	BolA homolog 1 (E. coli)	60	60	9	45	6	0.75	0.429504	0.779958
GATCCGCGGGCTTCCAC	s	T	1	BOLA3	388962	BolA homolog 3 (E. coli)	73	73	4	82	9	1.12329	0.709903	0.857588
GATCTGGGAGTGCTGGA	s	Th	3	BOP1	23246	Block of proliferation 1	91	91	16	169	28	1.85714	0.00551235	0.212183
GATCTTTCCACCAAGCC	s	T	3	BOP1	23246	Block of proliferation 1	0	0.9	0	6	5	6.66667	0.134721	0.686951
GATCGTGTTGCTGCCTG	s	T	2	BPHL	670	Biphenyl hydrolase-like (serine hydrolase; breast epithelial mucin-associated antigen)	12	12	2	0	0	0	0.0586249	0.399179
GATCAAGGCAGTTCAGA	s	Th	4	BPTF	2186	Bromodomain PHD finger transcription factor	20	20	7	5	5	0.25	0.110896	0.599606
GATCTGCAAATTGAAGT	s	Th	3	BPTF	2186	Bromodomain PHD finger transcription factor	8	8	5	0	0	0	0.0909465	0.618326
GATCATTTGGGTTAGTA	s	T	1	BPTF	2186	Bromodomain PHD finger transcription factor	5	5	2	0	0	0	0.181179	0.678357
GATCATACTAACGAGAA	s	T	1	BPTF	2186	Bromodomain PHD finger transcription factor	0	0.9	0	6	2	6.66667	0.134721	0.686951
GATCCCACCAGGAAGGA	s	Th	1	BRCA1	672	Breast cancer 1, early onset	11	11	1	48	5	4.36364	0.00852815	0.171639
GATCACCAAAAACACTC	s	Th	1	BRD1	23774	Bromodomain containing 1	20	20	9	16	18	0.8	0.621842	0.845484
GATCACGATGTTGTGGC	s	Th	2	BRD2	6046	Bromodomain containing 2	5	5	5	34	4	6.8	0.00974807	0.209474
GATCTGGAGTTACCTGA	s	Th	1	BRD2	6046	Bromodomain containing 2	147	147	5	80	5	0.544218	0.0169783	0.214744
GATCCCGGCGACCCCGG	s	T	3	BRD3	8019	Bromodomain containing 3	41	41	3	30	30	0.731707	0.403244	0.812162
GATCTATCTTGTGTGTG	s	T	3	BRD3	8019	Bromodomain containing 3	7	7	0	13	5	1.85714	0.339505	0.837221
GATCACACCGTACTTGA	s	Th	1	BRD4	23476	Bromodomain containing 4	2	2	2	30	11	15	0.00911982	0.175846
GATCTCAAAATTCCAGA	s	Th	1	BRD4	23476	Bromodomain containing 4	20	20	9	51	19	2.55	0.046162	0.406112
GATCATGATAGTCCAGG	s	T	4	BRD4	23476	Bromodomain containing 4	38	38	7	19	18	0.5	0.141771	0.666013
GATCGTCTCCTCATTGA	s	Th	3	BRD4	23476	Bromodomain containing 4	33	33	0	21	7	0.636364	0.400979	0.755086
GATCTGTCTCTTGGGTC	s	Th	1	BRD7	29117	Bromodomain containing 7	73	73	1	64	3	0.876712	0.658616	0.838871
GATCTCATGGAAAACCA	s	Th	4	BRD8	10902	Bromodomain containing 8	12	12	0	0	0	0	0.0509456	0.399179
GATCGTAGCTAGTTTGT	s	Th	1	BRD8	10902	Bromodomain containing 8	30	30	3	51	19	1.7	0.193212	0.713544
GATCCTGTCCCCTTTGG	s	T	3	BRD9	65980	Bromodomain containing 9	25	25	3	80	26	3.2	0.00414035	0.150911
GATCCTAGAGCCCTTCA	s	Th	1	BRE	9577	Brain and reproductive organ-expressed (TNFRSF1A modulator)	34	34	2	51	9	1.5	0.276161	0.793428
GATCTGCCCGCCTCGTC	s	Th	1	BRP44	25874	Brain protein 44	22	22	5	0	0	0	0.00981802	0.173524
GATCGCCTACCACAGGG	s	Th	1	BRPF1	7862	Bromodomain and PHD finger containing, 1	19	19	6	0	0	0	0.0168196	0.216203
GATCCTGCTGTGGCACG	s	Th	1	BRPF3	27154	Bromodomain and PHD finger containing, 3	134	134	23	69	9	0.514925	0.0105793	0.17434
GATCCTGCCTGCGTCCG	s	T	1	BRSK1	84446	BR serine/threonine kinase 1	23	23	1	110	7	4.78261	3.65576e-05	0.0435195
GATCCCGTAGCGTCAGT	s	T	4	BRSK1	84446	BR serine/threonine kinase 1	32	32	0	0	0	0	0.00279045	0.0977861
GATCCGGACAGGGCCCT	s	T	3	BRSK1	84446	BR serine/threonine kinase 1	43	43	2	15	15	0.348837	0.0505749	0.389717
GATCGAGGACACGAAGC	s	Th	1	BRSK2	9024	BR serine/threonine kinase 2	83	83	17	44	5	0.53012	0.0607749	0.405603
GATCCCGGGGCTTTTCC	s	T	1	BRUNOL4	56853	Bruno-like 4, RNA binding protein (Drosophila)	282	282	25	32	12	0.113475	2.73115e-13	0.0343782
GATCGGCATGAAGAGGC	s	Th	1	BRUNOL5	60680	Bruno-like 5, RNA binding protein (Drosophila)	34	34	7	16	18	0.470588	0.160575	0.606891
GATCATGGGACCAAACT	s	T	1	BRUNOL5	60680	Bruno-like 5, RNA binding protein (Drosophila)	41	41	10	24	1	0.585366	0.274401	0.744627
GATCGGACCCAAGGCTG	s	Th	1	BRUNOL6	60677	Bruno-like 6, RNA binding protein (Drosophila)	16	16	4	0	0	0	0.0290848	0.372717
GATCGAGCCACCAACCA	s	Th	4	BRUNOL6	60677	Bruno-like 6, RNA binding protein (Drosophila)	6	6	0	0	0	0	0.167517	0.678357
GATCAGAGTGAAGGTTC	s	Th	3	BRWD1	54014	Bromodomain and WD repeat domain containing 1	8	8	1	0	0	0	0.0909465	0.618326
GATCTTGGCCTCAGATG	s	Th	4	BRWD2	55717	Bromodomain and WD repeat domain containing 2	33	33	0	0	0	0	0.00120832	0.0977861
GATCAAAGCATCAGCAC	s	Th	2	BRWD2	55717	Bromodomain and WD repeat domain containing 2	9	9	10	0	0	0	0.0909465	0.433224
GATCAGACCTAACAGGC	s	Th	1	BRWD2	55717	Bromodomain and WD repeat domain containing 2	5	5	5	3	3	0.6	0.592387	0.844415
GATCAGCAGCCCCTGAG	s	T	1	BSCL2	26580	Bernardinelli-Seip congenital lipodystrophy 2 (seipin)	349	349	169	72	71	0.206304	2.79865e-12	0.0343782
GATCCCTCAGGGACAGA	s	Th	2	BSCL2	26580	Bernardinelli-Seip congenital lipodystrophy 2 (seipin)	8	8	8	0	0	0	0.0909465	0.618326
GATCGATACAGGGGAGA	s	Th	4	BSCL2	26580	Bernardinelli-Seip congenital lipodystrophy 2 (seipin)	6	6	0	0	0	0	0.167517	0.678357
GATCGTGGGTCAGGGAC	s	T	1	BSDC1	55108	BSD domain containing 1	161	161	8	173	28	1.07453	0.730077	0.860529
GATCACTGACTCTGAGG	s	Th	2	BSG	682	Basigin (Ok blood group)	45	45	13	15	7	0.333333	0.0333408	0.36968
GATCGCCCCCACCTCCA	s	Th	1	BSG	682	Basigin (Ok blood group)	112	112	20	118	85	1.05357	0.836428	0.862696
GATCATGTGTGTATGTG	s	T	1	BSN	8927	Bassoon (presynaptic cytomatrix protein)	45	45	17	6	5	0.133333	0.00542857	0.0982267
GATCTCATCAGTTCTGA	s	Th	1	BST2	684	Bone marrow stromal cell antigen 2	28	28	2	46	10	1.64286	0.246217	0.746581
GATCCAACAGAATCACT	s	T	1	BTBD1	53339	BTB (POZ) domain containing 1	17	17	3	56	5	3.29412	0.0127597	0.229656
GATCCTCCCTCTCATGG	s	T	3	BTBD10	84280	BTB (POZ) domain containing 10	50	50	2	0	0	0	0.000250387	0.0503822
GATCACAGTTCCTCTCG	s	T	2	BTBD10	84280	BTB (POZ) domain containing 10	0	0.9	0	4	4	4.44444	0.290216	0.686951
GATCAGGATGAGATTTA	s	Th	1	BTBD10	84280	BTB (POZ) domain containing 10	6	6	0	3	4	0.5	0.592387	0.844415
GATCATTTGCAAACCTC	s	T	1	BTBD11	121551	BTB (POZ) domain containing 11	8	8	8	9	9	1.125	0.890746	0.859563
GATCCATCCACGGGCCC	s	T	1	BTBD2	55643	BTB (POZ) domain containing 2	25	25	14	7	8	0.28	0.0848827	0.435815
GATCAGGGCAGCCGGGG	s	Th	1	BTBD2	55643	BTB (POZ) domain containing 2	384	384	29	366	36	0.953125	0.730203	0.833042
GATCTTCCTGCTACCCT	s	T	1	BTBD6	90135	BTB (POZ) domain containing 6	22	22	6	7	7	0.318182	0.133338	0.615908
GATCAGATAAGCTCTGG	s	Th	1	BTBD7	55727	BTB (POZ) domain containing 7	27	27	6	7	7	0.259259	0.042303	0.407162
GATCCATGTGCCACATG	s	Th	1	BTD	686	Biotinidase	6	6	3	0	0	0	0.167517	0.678357
GATCCAACCCAGAGGTA	s	T	5	BTF3L4	91408	Basic transcription factor 3-like 4	66	66	11	0	0	0	2.35457e-05	0.0343782
GATCACTTTATTTGCTA	s	Th	2	BTG1	694	B-cell translocation gene 1, anti-proliferative	0	0.9	0	93	8	103.333	3.4391e-08	0.0343782
GATCCTCTGATGTGGAC	s	T	4	BTG1	694	B-cell translocation gene 1, anti-proliferative	7	7	4	0	0	0	0.181179	0.618326
GATCTTCGAATGCTGCG	s	T	5	BTG1	694	B-cell translocation gene 1, anti-proliferative	0	0.9	0	4	4	4.44444	0.290216	0.686951
GATCCCTTTGAGAGGTG	s	T	2	BTG2	7832	BTG family, member 2	91	91	15	330	60	3.62637	3.97878e-10	0.0343782
GATCGGACTCAGCCAGC	s	Th	3	BTG2	7832	BTG family, member 2	28	28	7	0	0	0	0.00341255	0.129606
GATCTGTCCACTCCTGG	s	T	1	BTN3A2	11118	Butyrophilin, subfamily 3, member A2	0	0.9	0	58	22	64.4444	2.33168e-05	0.0406889
GATCAGCCAGAAAATGC	s	Th	1	BTRC	8945	Beta-transducin repeat containing	2	2	2	59	12	29.5	6.1436e-05	0.0512997
GATCATGATAATGGAGT	s	T	1	BTRC	8945	Beta-transducin repeat containing	46	46	25	0	0	0	0.000403622	0.0602665
GATCGATTACTTTGGGG	s	Th	1	BUB1	699	BUB1 budding uninhibited by benzimidazoles 1 homolog (yeast)	0	0.9	0	28	9	31.1111	0.00211292	0.156764
GATCCCAGAAGGGCAAA	s	T	1	BUB3	9184	BUB3 budding uninhibited by benzimidazoles 3 homolog (yeast)	55	55	4	37	10	0.672727	0.290098	0.745234
GATCCAATGGATTTGAA	s	T	1	BUD13	84811	BUD13 homolog (S. cerevisiae)	13	13	1	0	0	0	0.0586249	0.399179
GATCCACCACCAGAAAA	s	T	1	BUD31	8896	BUD31 homolog (S. cerevisiae)	98	98	16	59	36	0.602041	0.0915713	0.421512
GATCTGGTTCTGAGGAG	s	Th	1	BXDC1	84154	Brix domain containing 1	28	28	7	43	10	1.53571	0.333447	0.776731
GATCCCACTGCAGATGT	s	Th	3	BXDC2	55299	Brix domain containing 2	5	5	5	0	0	0	0.167517	0.678357
GATCACAGGGACATCTG	s	Th	3	BYSL	705	Bystin-like	17	17	4	21	3	1.23529	0.714991	0.860917
GATCCACTCCATCCCCC	s	T	1	BZRAP1	9256	Benzodiazapine receptor (peripheral) associated protein 1	212	212	8	43	1	0.20283	4.12889e-08	0.0343782
GATCCTGTCTTCCCTCC	s	Th	5	BZRAP1	9256	Benzodiazapine receptor (peripheral) associated protein 1	58	58	0	20	8	0.344828	0.013169	0.227069
GATCCTGAAGGTGTTTG	s	Th	4	BZRAP1	9256	Benzodiazapine receptor (peripheral) associated protein 1	8	8	8	0	0	0	0.0909465	0.618326
GATCCTCCTCCAGAAGG	s	T	1	BZW2	28969	Basic leucine zipper and W2 domains 2	35	35	4	9	2	0.257143	0.0534023	0.383951
GATCAGAGGTGAAGGGA	s	Th	1	C10orf10	11067	Chromosome 10 open reading frame 10	0	0.9	0	18	20	20	0.0120792	0.238835
GATCGTGCCTGTGTGCT	s	T	4	C10orf104	119504	Chromosome 10 open reading frame 104	7	7	0	0	0	0	0.181179	0.618326
GATCTTCACCAGCTGCT	s	Th	1	C10orf119	79892	Chromosome 10 open reading frame 119	3	3	0	7	6	2.33333	0.535479	0.792038
GATCCCCCTGGAGAGCC	s	T	1	C10orf132	401647	Chromosome 10 open reading frame 132	153	153	7	28	1	0.183007	1.86837e-06	0.0343782
GATCAAGAACAGGTACT	s	Th	1	C10orf137	26098	Chromosome 10 open reading frame 137	53	53	1	84	31	1.58491	0.125401	0.664737
GATCCACCATGCCCGGG	s	T	1	C10orf140	387640	Chromosome 10 open reading frame 140	8	8	2	4	4	0.5	0.373777	0.853335
GATCAGCTTCCCAGGAA	s	Th	1	C10orf33	84795	Chromosome 10 open reading frame 33	14	14	10	0	0	0	0.0290848	0.372717
GATCTCAGCTGGATGCC	s	Th	1	C10orf35	219738	Chromosome 10 open reading frame 35	42	42	3	0	0	0	0.000260508	0.0620318
GATCACCTCAGTTCTCC	s	Th	1	C10orf38	221061	Chromosome 10 open reading frame 38	197	197	3	15	9	0.0761421	8.2292e-12	0.0343782
GATCTGTCAACAGGTTA	s	Th	1	C10orf54	64115	Chromosome 10 open reading frame 54	17	17	17	10	9	0.588235	0.353765	0.79333
GATCCACCCCCTTCCCT	s	T	4	C10orf54	64115	Chromosome 10 open reading frame 54	5	5	5	6	5	1.2	0.910701	0.883973
GATCCTTCCCTCCACCT	s	T	1	C10orf57	80195	Chromosome 10 open reading frame 57	43	43	12	0	0	0	0.000651958	0.0620318
GATCTGTTTCTCTAGAA	s	T	1	C10orf58	84293	Chromosome 10 open reading frame 58	32	32	6	0	0	0	0.00279045	0.0977861
GATCAGCACAGATGGGT	s	T	4	C10orf58	84293	Chromosome 10 open reading frame 58	8	8	1	0	0	0	0.101495	0.618326
GATCATACCCTTCTTGT	s	Th	5	C10orf58	84293	Chromosome 10 open reading frame 58	5	5	1	0	0	0	0.167517	0.678357
GATCTGCAGTTCCACAT	s	T	2	C10orf59	55328	Chromosome 10 open reading frame 59	0	0.9	0	15	0	16.6667	0.034404	0.383968
GATCCATGGTTATTCCT	s	T	1	C10orf6	55719	Chromosome 10 open reading frame 6	5	5	1	0	0	0	0.181179	0.678357
GATCAGGAAAGTGACAC	s	T	1	C10orf65	112817	Chromosome 10 open reading frame 65	15	15	1	2	2	0.133333	0.13408	0.60077
GATCTTGAGGAACTAGA	s	Th	3	C10orf79	80217	Chromosome 10 open reading frame 79	6	6	6	0	0	0	0.167517	0.678357
GATCATGCCAACCAACT	s	T	4	C10orf90	118611	Chromosome 10 open reading frame 90	7	7	0	0	0	0	0.181179	0.618326
GATCTGTTGGCCGTTGG	s	T	3	C10orf92	54777	Chromosome 10 open reading frame 92	0	0.9	0	4	4	4.44444	0.290216	0.686951
GATCCTAGTTGATGGCC	s	T	1	C10orf97	80013	Chromosome 10 open reading frame 97	20	20	1	35	5	1.75	0.220238	0.749119
GATCTGGTCTCGGTGGT	s	Th	1	C11orf2	738	Chromosome 11 open reading frame2	341	341	4	438	9	1.28446	0.0472681	0.60183
GATCCTACCAAAGCACT	s	T	4	C11orf2	738	Chromosome 11 open reading frame2	5	5	5	0	0	0	0.181179	0.678357
GATCACTAAAGAGTTGC	s	Th	1	C11orf24	53838	Chromosome 11 open reading frame 24	12	12	7	18	0	1.5	0.477959	0.850127
GATCCACCAGCAGTGCC	s	T	4	C11orf30	56946	Chromosome 11 open reading frame 30	50	50	15	26	1	0.52	0.148377	0.603728
GATCCTGAAACCATGGG	s	T	4	C11orf31	280636	Chromosome 11 open reading frame 31	5	5	1	0	0	0	0.181179	0.678357
GATCCTGAAGCCATGGT	s	T	1	C11orf31	280636	Chromosome 11 open reading frame 31	186	186	9	167	26	0.897849	0.594212	0.811401
GATCCATGTTCAGTTGG	s	T	1	C11orf46	120534	Chromosome 11 open reading frame 46	35	35	6	2	2	0.0571429	0.00699559	0.127278
GATCCGGCTTGCCCAGA	s	T	1	C11orf48	79081	Chromosome 11 open reading frame 48	129	129	18	143	5	1.10853	0.620394	0.855876
GATCTGGTCTCTTTGGC	s	Th	1	C11orf51	25906	Chromosome 11 open reading frame 51	111	111	7	0	0	0	4.75797e-09	0.0343782
GATCAACTCTCTAATGG	s	T	1	C11orf54	28970	Chromosome 11 open reading frame 54	7	7	4	9	9	1.28571	0.566434	0.859563
GATCTGGCCCTCTCATC	s	Th	3	C11orf56	84067	Chromosome 11 open reading frame 56	30	30	9	51	9	1.7	0.193212	0.713544
GATCCCCTTTCCCACCC	s	Th	4	C11orf59	55004	Chromosome 11 open reading frame 59	534	534	144	0	0	0	0	0.0343782
GATCCCCTTCCCACCCT	s	T	3	C11orf59	55004	Chromosome 11 open reading frame 59	289	289	18	353	22	1.22145	0.176803	0.692204
GATCCCATGGAGGTTAG	s	Th	3	C11orf60	56912	Chromosome 11 open reading frame 60	11	11	5	5	5	0.454545	0.448963	0.810937
GATCCCGGAGTTTCCCC	s	T	1	C11orf61	79684	Chromosome 11 open reading frame 61	61	61	9	20	1	0.327869	0.0201388	0.213063
GATCCTCCTGTCTTCCT	s	T	1	C11orf68	83638	Chromosome 11 open reading frame 68	106	106	11	110	25	1.03774	0.851535	0.861899
GATCTTACTCTGTTTTC	s	Th	4	C11orf73	51501	Chromosome 11 open reading frame 73	6	6	0	0	0	0	0.167517	0.678357
GATCATGTGTCCAAAAG	s	T	1	C11orf74	119710	Chromosome 11 open reading frame 74	23	23	12	0	0	0	0.0123649	0.173524
GATCCCAGCCTCCTGAG	s	Th	1	C11orf79	54949	Chromosome 11 open reading frame 79	78	78	12	151	11	1.9359	0.00697277	0.212894
GATCCGGAGGCTGCGGG	s	T	1	C11orf80	79703	Chromosome 11 open reading frame 80	27	27	4	19	12	0.703704	0.527925	0.827382
GATCCAAGCTGCTTGAG	s	Th	1	C11orf9	745	Chromosome 11 open reading frame 9	572	572	5	225	17	0.393357	1.06271e-11	0.0343782
GATCCCTGGCTGCATCT	s	Th	1	C12orf10	60314	Chromosome 12 open reading frame 10	5	5	1	3	3	0.6	0.592387	0.844415
GATCCTGCTTCCAATGG	s	T	5	C12orf11	55726	Chromosome 12 open reading frame 11	0	0.9	0	24	1	26.6667	0.0051375	0.169253
GATCGCCCCATTGTACT	s	Th	4	C12orf27	283460	Chromosome 12 open reading frame 27	56	56	4	8	8	0.142857	0.00156277	0.0816905
GATCAGCCATACCTTTG	s	Th	4	C12orf29	91298	Chromosome 12 open reading frame 29	8	8	2	0	0	0	0.0909465	0.618326
GATCCTAAGTTAAGACT	s	Th	3	C12orf30	80018	Chromosome 12 open reading frame 30	28	28	1	0	0	0	0.00341255	0.129606
GATCAAGGCAGGGAAAG	s	Th	3	C12orf34	84915	Chromosome 12 open reading frame 34	3	3	3	120	8	40	2.08186e-09	0.0343782
GATCTTCCCCACCAACA	s	T	4	C12orf34	84915	Chromosome 12 open reading frame 34	7	7	7	0	0	0	0.181179	0.618326
GATCTCTGGGAGCTCCT	s	Th	1	C12orf44	60673	Chromosome 12 open reading frame 44	52	52	6	49	9	0.942308	0.828966	0.860723
GATCTGTGGAGGTCAAC	s	T	1	C12orf47	51275	Chromosome 12 open reading frame 47	12	12	2	0	0	0	0.0586249	0.399179
GATCAATTCAAAGTTAC	s	T	1	C12orf48	55010	Chromosome 12 open reading frame 48	0	0.9	0	4	0	4.44444	0.290216	0.686951
GATCCAAACCTTGGCCC	s	Th	1	C12orf51	283450	Chromosome 12 open reading frame 51	75	75	18	167	3	2.22667	0.000870059	0.120981
GATCATCTACTCTTGCT	s	T	1	C12orf51	283450	Chromosome 12 open reading frame 51	8	8	8	0	0	0	0.101495	0.618326
GATCCCCTGACCTAAGG	s	T	5	C12orf51	283450	Chromosome 12 open reading frame 51	8	8	5	0	0	0	0.101495	0.618326
GATCCGCCCTGGGTGGA	s	T	4	C12orf52	84934	Chromosome 12 open reading frame 52	0	0.9	0	4	4	4.44444	0.290216	0.686951
GATCATCTTGAATTACT	s	Th	1	C12orf53	196500	Chromosome 12 open reading frame 53	5	5	5	0	0	0	0.167517	0.678357
GATCGCCAGCCTGTCAG	s	T	1	C12orf57	113246	Chromosome 12 open reading frame 57	196	196	12	149	8	0.760204	0.175503	0.615684
GATCACAGCGAGGAGAA	s	Th	3	C13orf18	80183	Chromosome 13 open reading frame 18	3	3	3	30	1	10	0.00911982	0.175846
GATCACTGGTTTACTTT	s	Th	1	C13orf21	387923	Chromosome 13 open reading frame 21	8	8	2	0	0	0	0.0909465	0.618326
GATCCACTTGCATTCCA	s	T	1	C13orf7	79596	Chromosome 13 open reading frame 7	28	28	4	184	2	6.57143	7.62018e-09	0.0343782
GATCTGGTTCTTCCCTC	s	Th	1	C13orf8	283489	Chromosome 13 open reading frame 8	23	23	23	0	0	0	0.00577204	0.173524
GATCTGGACGCTGCTCT	s	Th	1	C14orf1	11161	Chromosome 14 open reading frame 1	16	16	6	49	46	3.0625	0.0189976	0.23334
GATCCATGGGGCTTTGT	s	Th	1	C14orf101	54916	Chromosome 14 open reading frame 101	17	17	4	57	6	3.35294	0.0101858	0.217317
GATCCTGGACCTGATGA	s	T	1	C14orf102	55051	Chromosome 14 open reading frame 102	0	0.9	0	11	11	12.2222	0.0669655	0.594545
GATCATGTGACCAATTG	s	T	1	C14orf104	55172	Chromosome 14 open reading frame 104	48	48	14	0	0	0	0.000250387	0.0512997
GATCAGTGGTTTCGAGG	s	T	1	C14orf119	55017	Chromosome 14 open reading frame 119	22	22	21	0	0	0	0.0123649	0.173524
GATCGGGCCCACCAGCA	s	Th	1	C14orf122	51016	Chromosome 14 open reading frame 122	25	25	9	0	0	0	0.00577204	0.161136
GATCCCACGGCGAACAC	s	T	1	C14orf124	56948	Chromosome 14 open reading frame 124	302	302	25	379	5	1.25497	0.115869	0.645975
GATCGAGAAGCCCCGTG	s	Th	3	C14orf128	84837	Chromosome 14 open reading frame 128	5	5	5	10	9	2	0.615841	0.820362
GATCATGTGGACCAGAG	s	T	1	C14orf129	51527	Chromosome 14 open reading frame 129	61	61	9	54	3	0.885246	0.718772	0.858062
GATCCATGTGGGCCAGG	s	Th	2	C14orf131	55778	Chromosome 14 open reading frame 131	19	19	4	15	7	0.789474	0.825165	0.845484
GATCGTCCTCATTCAGA	s	Th	4	C14orf132	56967	Chromosome 14 open reading frame 132	98	98	4	7	7	0.0714286	5.60248e-07	0.0343782
GATCCAGGACTTGGCGC	s	T	1	C14orf133	63894	Chromosome 14 open reading frame 133	46	46	5	214	64	4.65217	1.43382e-08	0.0343782
GATCTCAAGAAGCCCCA	s	Th	1	C14orf153	84334	Chromosome 14 open reading frame 153	17	17	1	75	16	4.41176	0.00100607	0.0967551
GATCCAGAAGCTGGTGG	s	T	1	C14orf159	80017	Chromosome 14 open reading frame 159	183	183	6	228	37	1.2459	0.20953	0.746063
GATCCAAAGACAGACCA	s	T	1	C14orf166	51637	Chromosome 14 open reading frame 166	37	37	8	143	2	3.86486	1.28547e-05	0.0388462
GATCAATCGACCTTGTG	s	Th	1	C14orf167	55449	Chromosome 14 open reading frame 167	12	12	0	0	0	0	0.0509456	0.399179
GATCACCTCTTAAAGGC	s	Th	1	C14orf172	115708	Chromosome 14 open reading frame 172	5	5	5	0	0	0	0.167517	0.678357
GATCCAGGCACTCACTT	s	T	1	C14orf2	9556	Chromosome 14 open reading frame 2	38	38	13	6	6	0.157895	0.0136242	0.160735
GATCACTGCCATCTGCT	s	Th	1	C14orf28	122525	Chromosome 14 open reading frame 28	6	6	0	0	0	0	0.167517	0.678357
GATCAGCAGATACTGAC	s	T	3	C14orf32	93487	Chromosome 14 open reading frame 32	20	20	3	0	0	0	0.0205587	0.216203
GATCTCTGCAACTAAGT	s	Th	1	C14orf32	93487	Chromosome 14 open reading frame 32	9	9	3	10	4	1.11111	0.952476	0.871292
GATCTACACGTGTTGTT	s	T	1	C14orf4	64207	Chromosome 14 open reading frame 4	12	12	1	15	15	1.25	0.873976	0.860689
GATCAGACACTGCCTTT	s	Th	1	C14orf43	91748	Chromosome 14 open reading frame 43	72	72	3	26	5	0.361111	0.0104832	0.169054
GATCCAAGAGAAGGAGG	s	Th	3	C14orf43	91748	Chromosome 14 open reading frame 43	8	8	2	10	4	1.25	0.952476	0.859563
GATCGAGAGCCGGTGAA	s	Th	1	C14orf45	80127	Chromosome 14 open reading frame 45	17	17	2	0	0	0	0.0168196	0.231134
GATCCCCTGAGCCCGGG	s	T	1	C14orf64	388011	Chromosome 14 open reading frame 64	12	12	5	41	42	3.41667	0.0426169	0.392884
GATCCACCCAGAGTGCC	s	T	3	C14orf65	317762	Chromosome 14 open reading frame 65	15	15	1	6	2	0.4	0.323488	0.673901
GATCCACTCTCCAGCGT	s	T	2	C14orf65	317762	Chromosome 14 open reading frame 65	0	0.9	0	6	2	6.66667	0.134721	0.686951
GATCTTGAAGCCGGACG	s	Th	1	C14orf65	317762	Chromosome 14 open reading frame 65	30	30	1	26	1	0.866667	0.712633	0.852925
GATCTCTCCAACAGGAC	s	Th	1	C14orf79	122616	Chromosome 14 open reading frame 79	55	55	3	0	0	0	3.46402e-05	0.0406889
GATCCCAGGCCTGTGGC	s	T	1	C14orf80	283643	Chromosome 14 open reading frame 80	22	22	4	33	3	1.5	0.468388	0.820222
GATCTCACCAGGGATAG	s	Th	4	C14orf83	161145	Chromosome 14 open reading frame 83	20	20	5	0	0	0	0.00981802	0.216203
GATCCTTAAGCTGAGGA	s	T	1	C14orf94	54930	Chromosome 14 open reading frame 94	0	0.9	0	30	7	33.3333	0.00277623	0.127163
GATCAGTTTGCATAATG	s	Th	4	C15orf15	51187	Chromosome 15 open reading frame 15	20	20	1	0	0	0	0.00981802	0.216203
GATCCTGGCTTCCAGAA	s	T	1	C15orf17	57184	Chromosome 15 open reading frame 17	33	33	2	0	0	0	0.00279045	0.0977861
GATCAAATGTAGCACAG	s	Th	1	C15orf17	57184	Chromosome 15 open reading frame 17	30	30	3	0	0	0	0.0020268	0.121827
GATCAACCTAGAGGTGG	s	T	2	C15orf27	123591	Chromosome 15 open reading frame 27	2	2	2	39	6	19.5	0.00203172	0.119474
GATCTTGGCGTTGTGGT	s	Th	3	C15orf29	79768	Chromosome 15 open reading frame 29	3	3	0	8	8	2.66667	0.294196	0.792038
GATCCGAGAGCAGGGGG	s	T	3	C15orf38	348110	Chromosome 15 open reading frame 38	0	0.9	0	11	0	12.2222	0.0669655	0.594545
GATCAAACCCAGCGGCC	s	Th	1	C15orf44	81556	Chromosome 15 open reading frame 44	125	125	7	123	2	0.984	0.990713	0.860734
GATCTTCCGGAAAAACT	s	Th	1	C16orf13	84326	Chromosome 16 open reading frame 13	47	47	8	7	7	0.148936	0.00226112	0.123426
GATCCTGCCACAGTCGC	s	T	1	C16orf13	84326	Chromosome 16 open reading frame 13	0	0.9	0	28	1	31.1111	0.00277623	0.156764
GATCCTCTGTGGCCACC	s	Th	2	C16orf14	84331	Chromosome 16 open reading frame 14	23	23	1	0	0	0	0.00577204	0.173524
GATCCTGACCCAGGCCC	s	Th	1	C16orf14	84331	Chromosome 16 open reading frame 14	41	41	8	20	2	0.487805	0.133523	0.639161
GATCCCTGGCCACCCGC	s	T	4	C16orf24	65990	Chromosome 16 open reading frame 24	70	70	11	139	2	1.98571	0.00810756	0.220258
GATCTCTGGAAGGTGAG	s	Th	3	C16orf24	65990	Chromosome 16 open reading frame 24	36	36	16	33	36	0.916667	0.754728	0.860588
GATCCAGGTTACTCTGG	s	T	1	C16orf33	79622	Chromosome 16 open reading frame 33	55	55	9	39	10	0.709091	0.401489	0.777235
GATCAAGACCACATCTG	s	Th	4	C16orf35	8131	Chromosome 16 open reading frame 35	0	0.9	0	97	12	107.778	2.00256e-08	0.0343782
GATCCCTTCGATGTGGA	s	T	3	C16orf42	115939	Chromosome 16 open reading frame 42	40	40	5	35	3	0.875	0.869691	0.85542
GATCCAGTGTGCAGAAG	s	T	1	C16orf45	89927	Chromosome 16 open reading frame 45	345	345	13	136	139	0.394203	6.17313e-07	0.0343782
GATCACCAGAAAGCAGA	s	Th	1	C16orf46	123775	Chromosome 16 open reading frame 46	6	6	0	0	0	0	0.167517	0.678357
GATCGCCACATGGCTGC	s	Th	1	C16orf48	84080	Chromosome 16 open reading frame 48	52	52	0	31	3	0.596154	0.22203	0.646502
GATCAGACCCTGGTAGC	s	Th	1	C16orf5	29965	Chromosome 16 open reading frame 5	281	281	47	210	3	0.747331	0.0728059	0.398732
GATCCTTTTCTGTATGG	s	Th	3	C16orf52	146174	Chromosome 16 open reading frame 52	52	52	3	3	3	0.0576923	0.000243396	0.059695
GATCCTCCGGGAGTAGT	s	Th	1	C16orf53	79447	Chromosome 16 open reading frame 53	39	39	6	143	24	3.66667	1.77873e-05	0.0435195
GATCTGCCATTGGCTTG	s	Th	4	C16orf55	124045	Chromosome 16 open reading frame 55	27	27	6	0	0	0	0.00341255	0.129606
GATCATCATCACGCGAG	s	T	1	C16orf55	124045	Chromosome 16 open reading frame 55	18	18	2	0	0	0	0.0205587	0.231134
GATCCTGTGTTTTGAGT	s	T	1	C16orf58	64755	Chromosome 16 open reading frame 58	88	88	18	37	38	0.420455	0.0139655	0.21196
GATCGGCATGGCTGACG	s	Th	4	C16orf58	64755	Chromosome 16 open reading frame 58	5	5	5	0	0	0	0.167517	0.678357
GATCCACTTGGAAAAGG	s	T	1	C16orf59	80178	Chromosome 16 open reading frame 59	8	8	1	11	8	1.375	0.890746	0.859563
GATCCATCCTCATCTCC	s	Th	1	C16orf61	56942	Chromosome 16 open reading frame 61	12	12	3	0	0	0	0.0509456	0.399179
GATCGGGAGTTGAGAAA	s	Th	1	C16orf61	56942	Chromosome 16 open reading frame 61	53	53	5	38	14	0.716981	0.425018	0.774127
GATCTGCTCTGCTGCCC	s	T	1	C16orf62	57020	Chromosome 16 open reading frame 62	81	81	5	230	24	2.83951	6.91635e-06	0.0343782
GATCTGTGTGCCCCAGC	s	Th	1	C16orf63	123811	Chromosome 16 open reading frame 63	11	11	2	59	2	5.36364	0.0019362	0.119404
GATCGGAGAGGAGGGCT	s	Th	4	C16orf7	9605	Chromosome 16 open reading frame 7	0	0.9	0	13	12	14.4444	0.0404366	0.404659
GATCTACTGAGGACCAT	s	T	1	C16orf7	9605	Chromosome 16 open reading frame 7	45	45	10	26	3	0.577778	0.203028	0.654358
GATCATCTGTGTCTGTG	s	T	4	C16orf7	9605	Chromosome 16 open reading frame 7	5	5	5	0	0	0	0.181179	0.678357
GATCAGTGTGCCTTACG	s	Th	1	C16orf77	146433	Chromosome 16 open reading frame 77	89	89	14	13	1	0.146067	2.51524e-05	0.0388462
GATCGGGAGACCCTGCG	s	Th	1	C16orf79	283870	Chromosome 16 open reading frame 79	37	37	5	28	26	0.756757	0.586882	0.806393
GATCCATGCAAATTGTC	s	Th	1	C16orf80	29105	Chromosome 16 open reading frame 80	34	34	2	26	8	0.764706	0.560294	0.804111
GATCCGGGACTGTCTGA	s	T	1	C16orf84	348180	Hypothetical protein LOC348180	2	2	2	7	8	3.5	0.49943	0.792038
GATCCGTGGAAATAGCC	s	T	1	C17orf28	283987	Chromosome 17 open reading frame 28	106	106	24	20	9	0.188679	0.000105	0.0388462
GATCCATGGAAATAGCC	s	T	1	C17orf28	283987	Chromosome 17 open reading frame 28	15	15	1	33	8	2.2	0.200348	0.662738
GATCACCAACAGCCGTC	s	Th	2	C17orf37	84299	Chromosome 17 open reading frame 37	6	6	0	198	24	33	2.37588e-14	0.0343782
GATCCTAGGGGTTTGGC	s	T	1	C17orf39	79018	Chromosome 17 open reading frame 39	7	7	0	95	22	13.5714	1.30309e-06	0.0343782
GATCCAGGAGGTAATCC	s	T	1	C17orf51	339263	Chromosome 17 open reading frame 51	5	5	5	0	0	0	0.181179	0.678357
GATCTTGAACTCCTAGC	s	Th	4	C17orf51	339263	Chromosome 17 open reading frame 51	0	0.9	0	5	5	5.55556	0.147326	0.686951
GATCCTTCCCTGGCTCT	s	Th	1	C17orf56	146705	Chromosome 17 open reading frame 56	98	98	18	25	13	0.255102	0.0002705	0.0609844
GATCTGGAGCGGTTGAG	s	T	1	C17orf59	54785	Chromosome 17 open reading frame 59	17	17	14	17	9	1	0.859247	0.867598
GATCACATTGGAGTTTG	s	Th	1	C17orf63	55731	Chromosome 17 open reading frame 63	8	8	2	5	5	0.625	0.694362	0.853335
GATCCTTGCTTCCTCCT	s	T	3	C17orf68	80169	Chromosome 17 open reading frame 68	0	0.9	0	30	14	33.3333	0.00277623	0.127163
GATCCCGATTTCCCCAT	s	Th	4	C17orf69	147081	Chromosome 17 open reading frame 69	0	0.9	0	8	8	8.88889	0.0759457	0.636774
GATCCACGCCAACCACG	s	T	3	C17orf70	80233	Chromosome 17 open reading frame 70	30	30	2	97	2	3.23333	0.00132797	0.0970897
GATCTCTTTTCCTGTCT	s	T	1	C17orf79	55352	Chromosome 17 open reading frame 79	61	61	7	19	0	0.311475	0.00966583	0.213063
GATCTTGCTTCCAGGCA	s	Th	1	C17orf80	55028	Chromosome 17 open reading frame 80	39	39	6	87	2	2.23077	0.0178745	0.24156
GATCCTGCCCTTCCAGT	s	Th	1	C17orf81	23587	Chromosome 17 open reading frame 81	20	20	7	51	11	2.55	0.046162	0.406112
GATCCTCATATACCCCC	s	T	1	C17orf81	23587	Chromosome 17 open reading frame 81	5	5	1	0	0	0	0.181179	0.678357
GATCAAGTTCAGTGCTG	s	Th	3	C17orf85	55421	Chromosome 17 open reading frame 85	28	28	2	16	1	0.571429	0.327909	0.740585
GATCCGGCTGCACACCA	s	T	1	C17orf90	339229	Chromosome 17 open reading frame 90	118	118	20	45	18	0.381356	0.00206209	0.0962785
GATCCTGCGTGTCTAGA	s	T	2	C18orf1	753	Chromosome 18 open reading frame 1	65	65	4	0	0	0	2.35457e-05	0.0343782
GATCTTCTGAATCCTGT	s	T	3	C18orf1	753	Chromosome 18 open reading frame 1	12	12	5	52	17	4.33333	0.00935834	0.171563
GATCATGCTCATGCCAC	s	T	5	C18orf1	753	Chromosome 18 open reading frame 1	0	0.9	0	6	2	6.66667	0.134721	0.686951
GATCGTAATCCCAAAAA	s	Th	2	C18orf10	25941	Chromosome 18 open reading frame 10	45	45	6	0	0	0	0.000156916	0.0602665
GATCTGGTTCCTGGACA	s	Th	1	C18orf10	25941	Chromosome 18 open reading frame 10	16	16	9	0	0	0	0.0290848	0.372717
GATCATGAGGCGCTCAA	s	T	1	C18orf22	79863	Chromosome 18 open reading frame 22	33	33	5	0	0	0	0.00279045	0.0977861
GATCTGCTGTTGCTGGA	s	T	1	C18orf25	147339	Chromosome 18 open reading frame 25	12	12	2	76	4	6.33333	0.000228042	0.062894
GATCTACAAAAAATTCC	s	T	1	C18orf32	497661	Chromosome 18 open reading frame 32	40	40	8	45	8	1.125	0.783527	0.860621
GATCCATCCAAAAAGCC	s	T	2	C18orf54	162681	Chromosome 18 open reading frame 54	0	0.9	0	11	11	12.2222	0.0669655	0.594545
GATCAGCCCCTTCTGTG	s	Th	3	C18orf54	162681	Chromosome 18 open reading frame 54	0	0.9	0	5	5	5.55556	0.147326	0.686951
GATCCGGGGCACAAAGA	s	T	1	C19orf10	56005	Chromosome 19 open reading frame 10	154	154	15	76	4	0.493506	0.00702513	0.12841
GATCAGTTTTGTGTCCG	s	Th	1	C19orf12	83636	Chromosome 19 open reading frame 12	103	103	13	39	17	0.378641	0.00299453	0.127157
GATCCCACCCCCCTGCA	s	T	3	C19orf12	83636	Chromosome 19 open reading frame 12	30	30	2	6	6	0.2	0.053864	0.229374
GATCGTAACACAAATGT	s	Th	1	C19orf2	8725	Chromosome 19 open reading frame 2	5	5	1	0	0	0	0.167517	0.678357
GATCTGCGCTGGGGGGT	s	T	1	C19orf20	91978	Chromosome 19 open reading frame 20	27	27	11	214	11	7.92593	3.60616e-11	0.0343782
GATCTTCACAACGACCC	s	T	3	C19orf25	148223	Chromosome 19 open reading frame 25	48	48	10	72	19	1.5	0.238688	0.692117
GATCCGGGGCAGGTACC	s	T	4	C19orf26	255057	Chromosome 19 open reading frame 26	88	88	8	0	0	0	8.98015e-07	0.0343782
GATCCCACTTCTATGAA	s	Th	1	C19orf28	126321	Chromosome 19 open reading frame 28	8	8	2	0	0	0	0.0909465	0.618326
GATCCTGGCCTTTGCCG	s	Th	1	C19orf28	126321	Chromosome 19 open reading frame 28	47	47	2	54	7	1.14894	0.62321	0.858361
GATCAGCTGTACCAGGG	s	Th	1	C19orf36	113177	Chromosome 19 open reading frame 36	5	5	5	0	0	0	0.167517	0.678357
GATCGTGCCACTGCCAC	s	T	4	C19orf40	91442	Chromosome 19 open reading frame 40	0	0.9	0	171	70	190	7.35634e-13	0.0343782
GATCCGAAGAGGAAGGG	s	T	2	C19orf43	79002	Chromosome 19 open reading frame 43	574	574	46	592	12	1.03136	0.75665	0.886421
GATCAGGTGCCCCAGTG	s	Th	1	C19orf44	84167	Chromosome 19 open reading frame 44	17	17	1	0	0	0	0.0168196	0.231134
GATCCTGCATCCAGGCA	s	T	1	C19orf46	163183	Chromosome 19 open reading frame 46	8	8	5	0	0	0	0.101495	0.618326
GATCACCCCATTTCTCC	s	Th	3	C19orf47	126526	Chromosome 19 open reading frame 47	3	3	3	67	10	22.3333	1.1906e-05	0.0388462
GATCGGTGCGTGGTGAC	s	Th	1	C19orf50	79036	Chromosome 19 open reading frame 50	0	0.9	0	20	21	22.2222	0.0120792	0.22588
GATCTGTGCAGGTGAGA	s	Th	4	C19orf50	79036	Chromosome 19 open reading frame 50	8	8	8	0	0	0	0.0909465	0.618326
GATCAGCCTGTCTGTGC	s	Th	1	C19orf54	284325	Chromosome 19 open reading frame 54	23	23	15	3	4	0.130435	0.0237562	0.240932
GATCCCGGCACTTTGGG	s	T	3	C19orf55	148137	Chromosome 19 open reading frame 55	40	40	8	0	0	0	0.00105553	0.0699457
GATCTTCAGCATGTGCG	s	T	1	C19orf56	51398	Chromosome 19 open reading frame 56	38	38	13	93	16	2.44737	0.0130747	0.208843
GATCTACTTCTTCCACC	s	T	1	C19orf6	91304	Chromosome 19 open reading frame 6	136	136	2	0	0	0	1.41524e-09	0.0343782
GATCAGCGAGGTTCTCC	s	Th	1	C19orf60	55049	Chromosome 19 open reading frame 60	180	180	8	226	18	1.25556	0.211044	0.745122
GATCCCAGGAACTGTGG	s	T	1	C19orf62	29086	Chromosome 19 open reading frame 62	207	207	23	139	21	0.671498	0.0538418	0.373241
GATCGACACGCAAAAAA	s	Th	1	C19orf63	284361	Chromosome 19 open reading frame 63	16	16	15	0	0	0	0.0290848	0.372717
GATCCTGGCCACTATGC	s	Th	4	C19orf63	284361	Chromosome 19 open reading frame 63	47	47	11	23	2	0.489362	0.111381	0.598406
GATCACGGAGCAGCCAA	s	Th	3	C1orf102	127700	Chromosome 1 open reading frame 102	28	28	4	0	0	0	0.00341255	0.129606
GATCCTGAACAGTTATC	s	T	3	C1orf103	55791	Chromosome 1 open reading frame 103	7	7	3	0	0	0	0.181179	0.618326
GATCCTTTGGTCGGGTT	s	Th	1	C1orf108	79647	Chromosome 1 open reading frame 108	9	9	3	0	0	0	0.0909465	0.433224
GATCTGGTTTTAGCCCA	s	Th	1	C1orf115	79762	Chromosome 1 open reading frame 115	56	56	58	0	0	0	3.46402e-05	0.0406889
GATCAGCTGTTGGATGT	s	Th	1	C1orf119	56900	Chromosome 1 open reading frame 119	59	59	10	39	10	0.661017	0.26179	0.749599
GATCAGTTAGTAGGCTT	s	Th	1	C1orf121	51029	Chromosome 1 open reading frame 121	0	0.9	0	16	18	17.7778	0.021955	0.383968
GATCCAGGTGGTGTTAC	s	T	1	C1orf122	127687	Chromosome 1 open reading frame 122	139	139	4	54	4	0.388489	0.00158519	0.0742493
GATCATTTCTATGTGTG	s	Th	1	C1orf128	57095	Chromosome 1 open reading frame 128	31	31	1	52	3	1.67742	0.193212	0.670484
GATCCTGAGGAGGATGA	s	Th	1	C1orf142	116841	Chromosome 1 open reading frame 142	56	56	2	38	5	0.678571	0.335785	0.745234
GATCCCCCTTGCTCCGC	s	T	1	C1orf144	26099	Chromosome 1 open reading frame 144	10	10	6	110	3	11	4.91885e-07	0.0343782
GATCCCAGGGGTGCACA	s	T	3	C1orf144	26099	Chromosome 1 open reading frame 144	58	58	3	119	16	2.05172	0.0173297	0.22789
GATCCCTTCCGTTGCAC	s	Th	5	C1orf144	26099	Chromosome 1 open reading frame 144	9	9	3	0	0	0	0.0909465	0.433224
GATCATCTCTTTCATGC	s	Th	1	C1orf149	64769	Chromosome 1 open reading frame 149	20	20	1	7	7	0.35	0.110896	0.657827
GATCCCCCTGCCCCCCC	s	Th	4	C1orf159	54991	Chromosome 1 open reading frame 159	0	0.9	0	51	55	56.6667	4.15955e-05	0.0512997
GATCCCTGCCCACGTGG	s	T	3	C1orf159	54991	Chromosome 1 open reading frame 159	23	23	4	11	11	0.478261	0.2759	0.676016
GATCTGGCAATGCTATC	s	Th	1	C1orf162	128346	Chromosome 1 open reading frame 162	0	0.9	0	13	1	14.4444	0.0404366	0.404659
GATCCAGCAATCTTGCT	s	T	2	C1orf163	65260	Chromosome 1 open reading frame 163	20	20	3	37	7	1.85	0.220238	0.686977
GATCCTCTCCTTAGTCT	s	T	1	C1orf164	55182	Chromosome 1 open reading frame 164	75	75	5	6	6	0.08	8.62984e-05	0.0343782
GATCTGCAGTCCAAGAA	s	T	4	C1orf165	79656	Chromosome 1 open reading frame 165	0	0.9	0	32	1	35.5556	0.00150902	0.120621
GATCATGTGAAGGGCAG	s	T	1	C1orf166	79594	Chromosome 1 open reading frame 166	23	23	2	2	2	0.0869565	0.0492918	0.240932
GATCATAAATGGCATGC	s	Th	5	C1orf183	55924	Chromosome 1 open reading frame 183	53	53	11	0	0	0	5.72305e-05	0.0435195
GATCTCTCTGAACCTTG	s	Th	2	C1orf183	55924	Chromosome 1 open reading frame 183	11	11	5	2	2	0.181818	0.197872	0.688701
GATCAAATTTGAGAATC	s	Th	1	C1orf187	374946	Chromosome 1 open reading frame 187	0	0.9	0	31	9	34.4444	0.00119467	0.127163
GATCAAGTTGGGGAACA	s	Th	4	C1orf187	374946	Chromosome 1 open reading frame 187	0	0.9	0	18	0	20	0.0120792	0.238835
GATCCAGATTTGCCGAT	s	T	1	C1orf19	116461	Chromosome 1 open reading frame 19	7	7	7	80	0	11.4286	1.27976e-05	0.0388462
GATCTTCCTCTACACCT	s	T	1	C1orf198	84886	Chromosome 1 open reading frame 198	103	103	34	65	26	0.631068	0.142217	0.599544
GATCCAAGAAATGGGGT	s	T	5	C1orf21	81563	Chromosome 1 open reading frame 21	2	2	2	54	1	27	0.000191644	0.0600848
GATCAAAATGCCTCCAT	s	Th	1	C1orf21	81563	Chromosome 1 open reading frame 21	6	6	6	0	0	0	0.167517	0.678357
GATCGCAAGCTGGATGA	s	T	1	C1orf212	113444	Chromosome 1 open reading frame 212	12	12	12	0	0	0	0.0586249	0.399179
GATCCAGAGAGTGGGGG	s	T	1	C1orf216	127703	Chromosome 1 open reading frame 216	285	285	35	100	5	0.350877	6.93902e-07	0.0343782
GATCTTAAGTGCCTCAG	s	T	3	C1orf25	81627	Chromosome 1 open reading frame 25	10	10	10	0	0	0	0.101495	0.433224
GATCCTGAGGCTGAGGG	s	T	5	C1orf34	22996	Chromosome 1 open reading frame 34	0	0.9	0	30	4	33.3333	0.00277623	0.127163
GATCCTGAGGCTGTTGG	s	T	1	C1orf34	22996	Chromosome 1 open reading frame 34	0	0.9	0	6	2	6.66667	0.134721	0.686951
GATCAGACGGAAAGCAG	s	Th	1	C1orf35	79169	Chromosome 1 open reading frame 35	52	52	19	105	15	2.01923	0.0206733	0.367551
GATCATTTTGCATCTGT	s	T	1	C1orf41	51668	Chromosome 1 open reading frame 41	7	7	4	6	2	0.857143	0.910701	0.853335
GATCCTTAAACAACCTA	s	T	1	C1orf52	148423	Chromosome 1 open reading frame 52	118	118	16	0	0	0	1.40596e-08	0.0343782
GATCCCGGTGACTGACT	s	Th	4	C1orf55	163859	Chromosome 1 open reading frame 55	0	0.9	0	5	2	5.55556	0.147326	0.686951
GATCAGTCATTGCTGAC	s	Th	1	C1orf59	113802	Chromosome 1 open reading frame 59	5	5	5	0	0	0	0.167517	0.678357
GATCTTCTCACCTGGGG	s	T	4	C1orf61	10485	Chromosome 1 open reading frame 61	100	100	7	410	85	4.1	6.4837e-14	0.0343782
GATCAAATGGGGTGATG	s	Th	5	C1orf61	10485	Chromosome 1 open reading frame 61	0	0.9	0	38	5	42.2222	0.000386126	0.0922803
GATCCGTCAGCCCACGG	s	T	1	C1orf61	10485	Chromosome 1 open reading frame 61	0	0.9	0	33	10	36.6667	0.00150902	0.120621
GATCAGGAACCAAAAAG	s	Th	1	C1orf61	10485	Chromosome 1 open reading frame 61	0	0.9	0	20	21	22.2222	0.0120792	0.22588
GATCCAGGCTCCTGAAT	s	T	4	C1orf61	10485	Chromosome 1 open reading frame 61	56	56	4	111	16	1.98214	0.0223855	0.239669
GATCTATATGGCTATAG	s	Th	2	C1orf61	10485	Chromosome 1 open reading frame 61	5	5	5	0	0	0	0.167517	0.678357
GATCCGCTAAGGGGCAT	s	T	1	C1orf64	149563	Chromosome 1 open reading frame 64	18	18	2	0	0	0	0.0205587	0.231134
GATCCCCAGCTGCCACT	s	T	1	C1orf66	51093	Chromosome 1 open reading frame 66	48	48	23	0	0	0	0.000250387	0.0512997
GATCCTGTGGGGAAGCT	s	T	5	C1orf69	200205	Chromosome 1 open reading frame 69	5	5	2	2	2	0.4	0.630424	0.844415
GATCCCGAAACCAATGA	s	T	3	C1orf77	26097	Chromosome 1 open reading frame 77	32	32	3	128	14	4	3.97642e-05	0.0435195
GATCAGAAGCCATTTGA	s	T	3	C1orf77	26097	Chromosome 1 open reading frame 77	15	15	2	2	2	0.133333	0.13408	0.60077
GATCTGAATGGCATAGA	s	Th	2	C1orf80	64853	Chromosome 1 open reading frame 80	0	0.9	0	7	6	7.77778	0.147326	0.636774
GATCAGCCCAACCCCCT	s	Th	3	C1orf85	112770	Chromosome 1 open reading frame 85	0	0.9	0	23	2	25.5556	0.00670973	0.184749
GATCCTGCCACCCTGAG	s	T	3	C1orf85	112770	Chromosome 1 open reading frame 85	8	8	8	6	5	0.75	0.747054	0.853335
GATCTGTGTGTTGTGGG	s	Th	1	C1orf9	51430	Chromosome 1 open reading frame 9	37	37	11	66	18	1.78378	0.120589	0.650204
GATCTGGACTATCATGG	s	Th	1	C1orf91	56063	Chromosome 1 open reading frame 91	5	5	5	0	0	0	0.167517	0.678357
GATCAGGACTAGGGGCT	s	Th	3	C1orf94	84970	Chromosome 1 open reading frame 94	5	5	2	0	0	0	0.167517	0.678357
GATCTCTTCCTCCCATG	s	Th	3	C1orf95	375057	Chromosome 1 open reading frame 95	97	97	3	0	0	0	5.52087e-08	0.0343782
GATCACCAACATGAACA	s	Th	1	C1QB	713	Complement component 1, q subcomponent, B chain	2	2	2	8	9	4	0.294196	0.792038
GATCCAGCCATCCATCT	s	T	4	C1QBP	708	Complement component 1, q subcomponent binding protein	0	0.9	0	4	0	4.44444	0.290216	0.686951
GATCAGATTCAACGCGG	s	Th	1	C1QC	714	Complement component 1, q subcomponent, C chain	136	136	22	382	41	2.80882	1.32933e-09	0.0343782
GATCCTGCACCTGGACG	s	T	1	C1QL1	10882	Complement component 1, q subcomponent-like 1	78	78	1	1470	408	18.8462	0	0.0343782
GATCGCCTTCTATGTGG	s	Th	1	C1QL2	165257	Complement component 1, q subcomponent-like 2	186	186	17	2	2	0.0107527	1.76303e-13	0.0343782
GATCCCGCAGCCTCTGG	s	T	4	C1QTNF1	114897	C1q and tumor necrosis factor related protein 1	0	0.9	0	6	6	6.66667	0.134721	0.686951
GATCCTCTGAGCTGCGC	s	T	1	C1QTNF4	114900	C1q and tumor necrosis factor related protein 4	715	715	67	128	1	0.179021	0	0.0343782
GATCCTGCCCCTGCCTG	s	T	1	C1QTNF6	114904	C1q and tumor necrosis factor related protein 6	7	7	6	2	2	0.285714	0.630424	0.779415
GATCAAGAAAGAGATGG	s	Th	1	C1R	715	Complement component 1, r subcomponent	28	28	1	75	7	2.67857	0.0089671	0.21454
GATCATTCTCAGTATCC	s	Th	1	C1S	716	Complement component 1, s subcomponent	66	66	15	7	6	0.106061	0.000119943	0.0545859
GATCCATCCTCTCTCCT	s	T	1	C2	717	Complement component 2	0	0.9	0	7	7	7.77778	0.134721	0.636774
GATCAGGTAGAACAACA	s	Th	1	C20orf103	24141	Chromosome 20 open reading frame 103	8	8	1	0	0	0	0.0909465	0.618326
GATCAGGGAACTAAGCA	s	T	1	C20orf108	116151	Chromosome 20 open reading frame 108	20	20	1	0	0	0	0.0205587	0.216203
GATCCCCAGATACCTTC	s	T	5	C20orf108	116151	Chromosome 20 open reading frame 108	0	0.9	0	19	11	21.1111	0.0180309	0.22588
GATCTAATTCCAAGGAC	s	Th	4	C20orf108	116151	Chromosome 20 open reading frame 108	5	5	1	0	0	0	0.167517	0.678357
GATCAATGAACCATCTC	s	T	1	C20orf11	54994	Chromosome 20 open reading frame 11	7	7	4	0	0	0	0.181179	0.618326
GATCAGCCTGCGACTGC	s	Th	3	C20orf11	54994	Chromosome 20 open reading frame 11	5	5	5	0	0	0	0.167517	0.678357
GATCCTGTTCTGAGCAA	s	T	1	C20orf111	51526	Chromosome 20 open reading frame 111	2	2	2	11	3	5.5	0.265396	0.734393
GATCAAGCCATCCAGGA	s	Th	1	C20orf112	140688	Chromosome 20 open reading frame 112	53	53	14	36	14	0.679245	0.314654	0.740627
GATCCCGGCCTCAGGGT	s	Th	4	C20orf116	65992	Chromosome 20 open reading frame 116	2	2	2	36	1	18	0.00295959	0.150925
GATCCAGCAGGTCTTCC	s	T	4	C20orf116	65992	Chromosome 20 open reading frame 116	15	15	6	0	0	0	0.0344982	0.372717
GATCGGGTGCTAGGACA	s	Th	1	C20orf117	140710	Chromosome 20 open reading frame 117	102	102	2	340	41	3.33333	2.11812e-10	0.0343782
GATCACCTTCTGAGCAG	s	Th	4	C20orf12	55184	Chromosome 20 open reading frame 12	0	0.9	0	5	5	5.55556	0.147326	0.686951
GATCCTGTTTTTGTTTG	s	T	3	C20orf121	79183	Chromosome 20 open reading frame 121	63	63	7	0	0	0	3.76817e-05	0.0343782
GATCGTGCGCCGAGGCC	s	Th	4	C20orf149	79144	Chromosome 20 open reading frame 149	9	9	7	95	22	10.5556	2.18983e-06	0.0343782
GATCCCACCAGCCAGCA	s	T	1	C20orf149	79144	Chromosome 20 open reading frame 149	1066	1066	42	1621	117	1.52064	8.06236e-09	0.0343782
GATCTCGTCAATAAACT	s	Th	1	C20orf175	140876	Chromosome 20 open reading frame 175	0	0.9	0	26	28	28.8889	0.00375444	0.169253
GATCATAGCTCCTAGTG	s	Th	1	C20orf177	63939	Chromosome 20 open reading frame 177	0	0.9	0	41	2	45.5556	0.000220483	0.0725022
GATCCCACTTACTGCAG	s	T	3	C20orf19	55857	Chromosome 20 open reading frame 19	0	0.9	0	24	2	26.6667	0.0051375	0.169253
GATCTAGTTGGATAGTT	s	T	1	C20orf194	25943	Chromosome 20 open reading frame 194	35	35	10	0	0	0	0.00171353	0.0929818
GATCACTTGTGGGGTCA	s	Th	4	C20orf194	25943	Chromosome 20 open reading frame 194	55	55	12	20	5	0.363636	0.0197499	0.237083
GATCGGCCTGAGGCTGG	s	Th	1	C20orf196	149840	Chromosome 20 open reading frame 196	31	31	1	8	6	0.258065	0.0636934	0.388258
GATCTGGCTGAACCAGT	s	Th	1	C20orf199	441951	Chromosome 20 open reading frame 199	16	16	10	52	9	3.25	0.011983	0.223731
GATCCTTTCCGCCTGTG	s	Th	5	C20orf199	441951	Chromosome 20 open reading frame 199	5	5	2	0	0	0	0.167517	0.678357
GATCGTTGGGGAACCCC	s	Th	1	C20orf24	55969	Chromosome 20 open reading frame 24	28	28	1	105	8	3.75	0.000177613	0.0624847
GATCCTGCACAGGTATG	s	Th	1	C20orf27	54976	Chromosome 20 open reading frame 27	72	72	9	74	1	1.02778	0.868924	0.86146
GATCTTTGTTCTTGACC	s	T	1	C20orf3	57136	Chromosome 20 open reading frame 3	17	17	17	0	0	0	0.0344982	0.231134
GATCCCGATGGGCTGGT	s	T	2	C20orf3	57136	Chromosome 20 open reading frame 3	0	0.9	0	6	2	6.66667	0.134721	0.686951
GATCACCTTAGTTTGAT	s	T	1	C20orf30	29058	Chromosome 20 open reading frame 30	0	0.9	0	6	5	6.66667	0.134721	0.686951
GATCCTGGAAATGAGAT	s	T	3	C20orf39	79953	Chromosome 20 open reading frame 39	88	88	5	71	2	0.806818	0.42308	0.789283
GATCACAGTCCCTGTGC	s	Th	1	C20orf4	25980	Chromosome 20 open reading frame 4	12	12	4	69	5	5.75	0.000427211	0.0926416
GATCCTTGTTGGTCTAG	s	T	1	C20orf43	51507	Chromosome 20 open reading frame 43	118	118	10	61	0	0.516949	0.0273974	0.217304
GATCTGTTTTGTAGCTG	s	T	4	C20orf46	55321	Chromosome 20 open reading frame 46	27	27	6	30	1	1.11111	0.822516	0.861156
GATCGGAATGCGGGGTC	s	Th	1	C20orf52	140823	Chromosome 20 open reading frame 52	0	0.9	0	228	247	253.333	0	0.0343782
GATCCTGCCTGCCTTTG	s	Th	3	C20orf67	63935	Chromosome 20 open reading frame 67	31	31	5	102	19	3.29032	0.000589326	0.0742493
GATCGCTGCCTGTGCAT	s	Th	4	C20orf67	63935	Chromosome 20 open reading frame 67	5	5	2	0	0	0	0.167517	0.678357
GATCTCTCCACCCACTG	s	Th	4	C20orf74	57186	Chromosome 20 open reading frame 74	17	17	12	0	0	0	0.0168196	0.231134
GATCGCTGCTCAGAGTG	s	Th	1	C20orf91	284800	Chromosome 20 open reading frame 91	0	0.9	0	5	5	5.55556	0.147326	0.686951
GATCTACAGTCTCCCTG	s	T	1	C20orf96	140680	Chromosome 20 open reading frame 96	0	0.9	0	11	7	12.2222	0.0669655	0.594545
GATCTGCATTCTCAGCT	s	T	1	C21orf128	150147	Chromosome 21 open reading frame 128	10	10	7	0	0	0	0.101495	0.433224
GATCCCTCCCTCCCAGT	s	Th	1	C21orf15	54094	Chromosome 21 open reading frame 15	8	8	8	0	0	0	0.0909465	0.618326
GATCACTGCGGCCCCAG	s	Th	1	C21orf2	755	Chromosome 21 open reading frame 2	95	95	14	187	15	1.96842	0.00269212	0.158467
GATCTCTGAGCAGTGGG	s	T	3	C21orf2	755	Chromosome 21 open reading frame 2	22	22	7	2	2	0.0909091	0.0492918	0.240932
GATCCAGTCTCAAGCCT	s	T	1	C21orf2	755	Chromosome 21 open reading frame 2	0	0.9	0	4	4	4.44444	0.290216	0.686951
GATCAGGAAACCAGAAA	s	Th	1	C21orf33	8209	Chromosome 21 open reading frame 33	52	52	10	0	0	0	5.72305e-05	0.0435195
GATCGGAGCCATGGTGA	s	Th	4	C21orf33	8209	Chromosome 21 open reading frame 33	22	22	4	0	0	0	0.00981802	0.173524
GATCTGTCAGAACCATT	s	Th	1	C21orf45	54069	Chromosome 21 open reading frame 45	5	5	5	0	0	0	0.167517	0.678357
GATCGAGCAGACCTCCA	s	Th	1	C21orf56	84221	Chromosome 21 open reading frame 56	17	17	5	144	5	8.47059	2.89915e-08	0.0343782
GATCATCTGTGTTGACA	s	T	1	C21orf57	54059	Chromosome 21 open reading frame 57	0	0.9	0	33	14	36.6667	0.00150902	0.120621
GATCCGCAAGGGCTCCC	s	T	4	C21orf58	54058	Chromosome 21 open reading frame 58	0	0.9	0	61	14	67.7778	1.29653e-05	0.0388462
GATCCCATCCGCATGGA	s	T	1	C21orf59	56683	Chromosome 21 open reading frame 59	32	32	7	54	8	1.6875	0.199848	0.675964
GATCAGACATGGGGGAC	s	T	4	C21orf59	56683	Chromosome 21 open reading frame 59	15	15	8	28	10	1.86667	0.300409	0.754884
GATCCCAAATGCCCCTC	s	Th	1	C21orf63	59271	Chromosome 21 open reading frame 63	33	33	0	0	0	0	0.00120832	0.0977861
GATCTATGAGACTGAAA	s	Th	1	C21orf66	94104	Chromosome 21 open reading frame 66	9	9	0	7	7	0.777778	0.694362	0.856964
GATCACCGTGTAGCATG	s	Th	1	C21orf86	257103	Chromosome 21 open reading frame 86	28	28	13	0	0	0	0.00341255	0.129606
GATCAGGCAGTTCCTGG	s	Th	1	C22orf16	400916	Chromosome 22 open reading frame 16	556	556	54	220	26	0.395683	1.90272e-11	0.0343782
GATCTGCAGTGAGAGGG	s	Th	2	C22orf26	55267	Chromosome 22 open reading frame 26	6	6	6	0	0	0	0.167517	0.678357
GATCCGTGTTGCCTCAC	s	Th	4	C22orf28	51493	Chromosome 22 open reading frame 28	0	0.9	0	10	11	11.1111	0.0759457	0.594545
GATCTTCTTCACACCAA	s	T	2	C22orf28	51493	Chromosome 22 open reading frame 28	18	18	9	30	3	1.66667	0.456156	0.773915
GATCTGCGAAAGACCAA	s	T	1	C22orf30	253143	Chromosome 22 open reading frame 30	10	10	3	17	5	1.7	0.386033	0.806271
GATCCCTCTTCTTCCTG	s	Th	1	C22orf32	91689	Chromosome 22 open reading frame 32	80	80	5	0	0	0	6.48211e-07	0.0343782
GATCCCCTTTCTCTATG	s	T	1	C22orf32	91689	Chromosome 22 open reading frame 32	169	169	17	84	4	0.497041	0.00547234	0.120953
GATCCGGGAGACAGTGG	s	T	5	C22orf36	388886	Chromosome 22 open reading frame 36	0	0.9	0	4	0	4.44444	0.290216	0.686951
GATCCCGCCAGAACGGC	s	Th	1	C22orf9	23313	Chromosome 22 open reading frame 9	225	225	23	57	0	0.253333	4.68334e-08	0.0343782
GATCCCGCCAGAACGCC	s	T	5	C22orf9	23313	Chromosome 22 open reading frame 9	60	60	62	0	0	0	6.03743e-05	0.0388462
GATCTTCTCTGTGGGGG	s	T	1	C22orf9	23313	Chromosome 22 open reading frame 9	95	95	18	41	5	0.431579	0.0125622	0.170148
GATCAAAATAACAGTGA	s	Th	1	C22orf9	23313	Chromosome 22 open reading frame 9	20	20	7	48	5	2.4	0.0687187	0.432139
GATCTGCCTGTGCTGGG	s	Th	5	C2orf14	440908	Chromosome 2 open reading frame 14	33	33	13	0	0	0	0.00120832	0.0977861
GATCCCAGCTACCTGGG	s	Th	3	C2orf15	150590	Chromosome 2 open reading frame 15	0	0.9	0	16	9	17.7778	0.021955	0.383968
GATCTTTTGTCTTCCAG	s	T	1	C2orf24	27013	Chromosome 2 open reading frame 24	30	30	2	6	6	0.2	0.053864	0.229374
GATCAGTTATCGACTCC	s	Th	5	C2orf3	6936	Chromosome 2 open reading frame 3	8	8	2	0	0	0	0.0909465	0.618326
GATCTTGGATGTGCTGG	s	T	1	C2orf33	56947	Chromosome 2 open reading frame 33	63	63	1	7	8	0.111111	0.000543047	0.0610295
GATCAGATTCTGCCCCA	s	Th	1	C2orf33	56947	Chromosome 2 open reading frame 33	0	0.9	0	5	1	5.55556	0.147326	0.686951
GATCAAGTTTGAGTATG	s	Th	1	C2orf42	54980	Chromosome 2 open reading frame 42	31	31	1	95	3	3.06452	0.0013966	0.119494
GATCCACGCAGGTAGGT	s	T	1	C2orf52	151477	Chromosome 2 open reading frame 52	2	2	2	67	2	33.5	3.31657e-05	0.0388462
GATCCTGTCTTCTTTCA	s	T	1	C2orf55	343990	Chromosome 2 open reading frame 55	13	13	6	0	0	0	0.0586249	0.399179
GATCCGCCGCTCTCTGG	s	Th	1	C2orf7	84279	Chromosome 2 open reading frame 7	102	102	17	139	9	1.36275	0.173953	0.735348
GATCTGTACCAGGTACC	s	Th	2	C3	718	Complement component 3	192	192	18	748	38	3.89583	0	0.0343782
GATCAGACCTCCTTGTC	s	Th	4	C3	718	Complement component 3	14	14	1	8	1	0.571429	0.523147	0.778147
GATCGAAAGGCACTCCA	s	Th	1	C3orf1	51300	Chromosome 3 open reading frame 1	23	23	23	0	0	0	0.00577204	0.173524
GATCCGGTGCAGCGGGA	s	T	1	C3orf10	55845	Chromosome 3 open reading frame 10	365	365	31	392	19	1.07397	0.581174	0.857782
GATCAACACACAGAAAA	s	T	1	C3orf14	57415	Chromosome 3 open reading frame 14	27	27	2	24	25	0.888889	0.966961	0.860415
GATCACTGCCTGAGACA	s	Th	1	C3orf17	25871	Chromosome 3 open reading frame 17	0	0.9	0	95	12	105.556	3.4391e-08	0.0343782
GATCAACAAGGTTTGCC	s	Th	1	C3orf17	25871	Chromosome 3 open reading frame 17	17	17	2	15	1	0.882353	0.825165	0.85979
GATCCAGCGCGTGCTCG	s	Th	1	C3orf23	285343	Chromosome 3 open reading frame 23	0	0.9	0	20	21	22.2222	0.0120792	0.22588
GATCTCTGGATTCAGTG	s	Th	1	C3orf23	285343	Chromosome 3 open reading frame 23	12	12	3	0	0	0	0.0509456	0.399179
GATCTCGGAGACGAGTG	s	Th	3	C3orf26	84319	Chromosome 3 open reading frame 26	8	8	2	10	7	1.25	0.952476	0.859563
GATCACTGGAATGTGGG	s	Th	1	C3orf26	84319	Chromosome 3 open reading frame 26	61	61	13	69	5	1.13115	0.755023	0.859871
GATCCCGACTGTGGAGA	s	Th	2	C3orf31	132001	Chromosome 3 open reading frame 31	0	0.9	0	5	1	5.55556	0.147326	0.686951
GATCGGAATTTCCACCA	s	Th	1	C3orf37	56941	Chromosome 3 open reading frame 37	36	36	6	2	2	0.0555556	0.00303624	0.127278
GATCCTGATGTTTCCTA	s	T	1	C3orf39	84892	Chromosome 3 open reading frame 39	2	2	2	15	3	7.5	0.141793	0.606819
GATCCCACCTGGTATCA	s	Th	1	C3orf42	84657	Chromosome 3 open reading frame 42	0	0.9	0	66	15	73.3333	4.60262e-06	0.0343782
GATCGTGGTGGTGGGGG	s	T	4	C3orf60	25915	Chromosome 3 open reading frame 60	0	0.9	0	82	13	91.1111	7.02724e-07	0.0343782
GATCGTGGTGGTGGGGA	s	Th	1	C3orf60	25915	Chromosome 3 open reading frame 60	169	169	4	125	3	0.739645	0.15119	0.625375
GATCCCCAGGAAGAGCA	s	Th	4	C3orf63	23272	Chromosome 3 open reading frame 63	0	0.9	0	8	9	8.88889	0.0759457	0.636774
GATCGAGGAGATGCCCT	s	Th	1	C4A	720	Complement component 4A (Rodgers blood group)	87	87	25	115	22	1.32184	0.282218	0.772914
GATCGGGAATGGTCTGT	s	Th	1	C4orf10	317648	Chromosome 4 open reading frame 10	3	3	3	28	6	9.33333	0.00911982	0.218674
GATCCCAGAGGTGCATT	s	T	1	C4orf10	317648	Chromosome 4 open reading frame 10	8	8	5	0	0	0	0.101495	0.618326
GATCCGAAGCCAACACA	s	T	1	C4orf10	317648	Chromosome 4 open reading frame 10	0	0.9	0	6	5	6.66667	0.134721	0.686951
GATCAGCACTTGGTGGG	s	Th	1	C4orf10	317648	Chromosome 4 open reading frame 10	9	9	0	18	0	2	0.283139	0.806271
GATCGTCAGATTCAGAT	s	T	1	C4orf16	55435	Chromosome 4 open reading frame 16	12	12	5	0	0	0	0.0586249	0.399179
GATCTTCAGCTGTTTGC	s	T	4	C4orf20	55325	Chromosome 4 open reading frame 20	10	10	0	0	0	0	0.101495	0.433224
GATCCACATTATACCGG	s	T	1	C4orf20	55325	Chromosome 4 open reading frame 20	0	0.9	0	9	2	10	0.0669655	0.594545
GATCTCTTTTGCTATGG	s	Th	1	C4orf27	54969	Chromosome 4 open reading frame 27	23	23	16	10	3	0.434783	0.153488	0.676016
GATCCTCCTGAGTTCCA	s	T	4	C4orf27	54969	Chromosome 4 open reading frame 27	8	8	5	2	2	0.25	0.373777	0.779415
GATCCTCCCACAGTGGA	s	T	1	C4orf28	133015	Chromosome 4 open reading frame 28	28	28	3	130	19	4.64286	1.72513e-05	0.0343782
GATCTGCTGAAGTCAGA	s	Th	3	C4orf30	54876	Chromosome 4 open reading frame 30	0	0.9	0	7	7	7.77778	0.147326	0.636774
GATCCCTTGCAGAACGA	s	T	1	C4orf8	8603	Chromosome 4 open reading frame 8	22	22	21	39	5	1.77273	0.237117	0.726478
GATCATTAAAGCCTGAG	s	Th	1	C5	727	Complement component 5	5	5	1	0	0	0	0.167517	0.678357
GATCCCCAGGATGCCCA	s	Th	2	C5AR1	728	Complement component 5a receptor 1	0	0.9	0	30	6	33.3333	0.00211292	0.127163
GATCTTTACTGATGCAC	s	T	1	C5orf13	9315	Chromosome 5 open reading frame 13	33	33	2	2	2	0.0606061	0.0113446	0.158412
GATCTTCTTCCCCATTT	s	T	1	C5orf21	83989	Chromosome 5 open reading frame 21	15	15	4	2	2	0.133333	0.13408	0.60077
GATCAACTAAAGGAGGC	s	T	5	C5orf24	134553	Chromosome 5 open reading frame 24	3	3	3	4	4	1.33333	0.93679	0.848303
GATCCAGATGCTGGGGG	s	T	4	C5orf25	375484	Chromosome 5 open reading frame 25	0	0.9	0	22	3	24.4444	0.00957784	0.184749
GATCTTGCTGACACTGC	s	Th	5	C5orf37	134359	Chromosome 5 open reading frame 37	0	0.9	0	41	12	45.5556	0.000220483	0.0725022
GATCCGGGGCGCCTTGG	s	T	1	C5orf38	153571	Chromosome 5 open reading frame 38	0	0.9	0	69	8	76.6667	4.02592e-06	0.0343782
GATCTGTGGAGCTAAGC	s	T	1	C5orf39	389289	Chromosome 5 open reading frame 39	3	3	3	17	2	5.66667	0.0762406	0.428561
GATCCAGTGTTGGAGAG	s	T	1	C5orf40	408263	Chromosome 5 open reading frame 40	25	25	11	0	0	0	0.00748908	0.161136
GATCCGCGCTATTCCCC	s	T	2	C5orf5	51306	Chromosome 5 open reading frame 5	5	5	2	2	2	0.4	0.630424	0.844415
GATCCTGGACAGGATGC	s	T	1	C6orf100	729583	Chromosome 6 open reading frame 100	0	0.9	0	45	18	50	0.000248529	0.0620318
GATCCAGGGTGCTGTTG	s	T	1	C6orf106	64771	Chromosome 6 open reading frame 106	206	206	8	143	16	0.694175	0.0838505	0.396814
GATCCTCCAGGGCAGGT	s	T	1	C6orf108	10591	Chromosome 6 open reading frame 108	113	113	11	156	22	1.38053	0.159112	0.668763
GATCCTGGATGTCCTTC	s	T	1	C6orf113	221302	Chromosome 6 open reading frame 113	5	5	5	59	17	11.8	0.000395706	0.0630416
GATCCCTGACGCAGCGT	s	Th	2	C6orf124	653483	Chromosome 6 open reading frame 124	5	5	1	8	9	1.6	0.615841	0.85689
GATCATAAGGCCTGAGC	s	Th	1	C6orf125	84300	Chromosome 6 open reading frame 125	69	69	2	139	17	2.01449	0.00508185	0.178668
GATCATTCCAGTTAGTT	s	Th	1	C6orf130	221443	Chromosome 6 open reading frame 130	37	37	8	0	0	0	0.000722659	0.073078
GATCATCCTTCCTGAAA	s	Th	1	C6orf130	221443	Chromosome 6 open reading frame 130	0	0.9	0	13	9	14.4444	0.0404366	0.404659
GATCTCCCCATCTCCCC	s	T	1	C6orf134	79969	Chromosome 6 open reading frame 134	8	8	9	97	13	12.125	4.65886e-06	0.0343782
GATCCCAAATGTTCCCA	s	T	1	C6orf136	221545	Chromosome 6 open reading frame 136	0	0.9	0	17	1	18.8889	0.0180309	0.238835
GATCCTTGACCTTGGAG	s	T	1	C6orf136	221545	Chromosome 6 open reading frame 136	90	90	23	52	10	0.577778	0.0940439	0.426653
GATCCCCGTTCTTCAAG	s	T	1	C6orf145	221749	Chromosome 6 open reading frame 145	23	23	4	32	32	1.3913	0.468388	0.820222
GATCACAGCTGCCCTTG	s	Th	3	C6orf153	88745	Chromosome 6 open reading frame 153	5	5	5	56	6	11.2	0.000387715	0.0705426
GATCCCAGCTCTCAGAT	s	Th	3	C6orf154	221424	Chromosome 6 open reading frame 154	34	34	2	0	0	0	0.00120832	0.0929818
GATCTGACCTGTGAAAA	s	T	1	C6orf159	134701	Chromosome 6 open reading frame 159	15	15	2	0	0	0	0.0344982	0.372717
GATCAAATAATGCGACG	s	Th	1	C6orf166	55122	Chromosome 6 open reading frame 166	86	86	1	0	0	0	2.41607e-07	0.0343782
GATCCTCTTCAACCCTG	s	T	1	C6orf168	84553	Chromosome 6 open reading frame 168	8	8	1	13	13	1.625	0.598244	0.837221
GATCTTCATTGTCCTCC	s	T	5	C6orf174	387104	Chromosome 6 open reading frame 174	30	30	5	0	0	0	0.00456115	0.121827
GATCCTGTATTGGGCTG	s	T	4	C6orf192	116843	Chromosome 6 open reading frame 192	13	13	3	0	0	0	0.0586249	0.399179
GATCTTCTCATTGGAGA	s	T	1	C6orf203	51250	Chromosome 6 open reading frame 203	18	18	6	9	10	0.5	0.404649	0.79333
GATCTGGTGAGCACCTT	s	T	1	C6orf211	79624	Chromosome 6 open reading frame 211	2	2	2	4	4	2	0.93679	0.848303
GATCCCCCGAAGCTGCC	s	Th	1	C6orf221	154288	Chromosome 6 open reading frame 221	0	0.9	0	33	1	36.6667	0.00119467	0.120621
GATCACTTGAGGCAGAG	s	Th	4	C6orf32	9750	Chromosome 6 open reading frame 32	9	9	0	0	0	0	0.0909465	0.433224
GATCATGGGAGCCAGAG	s	T	1	C6orf47	57827	Chromosome 6 open reading frame 47	17	17	1	48	21	2.82353	0.0334592	0.397831
GATCCCAACGGCTTGCG	s	Th	1	C6orf48	50854	Chromosome 6 open reading frame 48	205	205	15	664	39	3.23902	0	0.0343782
GATCACCCCTTCTGTGT	s	Th	3	C6orf57	135154	Chromosome 6 open reading frame 57	6	6	0	0	0	0	0.167517	0.678357
GATCCCCAGCGCCAGGA	s	Th	1	C6orf60	79632	Chromosome 6 open reading frame 60	92	92	11	61	0	0.663043	0.161025	0.617088
GATCCTACTCCTTTGGA	s	T	1	C6orf62	81688	Chromosome 6 open reading frame 62	108	108	23	9	6	0.0833333	2.99284e-06	0.0343782
GATCAGAGAATGCAGCA	s	Th	3	C6orf62	81688	Chromosome 6 open reading frame 62	17	17	2	7	4	0.411765	0.17836	0.734404
GATCTTGCAGTACACGG	s	Th	2	C6orf70	55780	Chromosome 6 open reading frame 70	16	16	7	34	14	2.125	0.11009	0.623084
GATCCAGGCCTGCAAGG	s	Th	1	C6orf81	221481	Chromosome 6 open reading frame 81	0	0.9	0	11	12	12.2222	0.0404366	0.594545
GATCCGTGGCCTGAAGG	s	T	1	C6orf85	63027	Chromosome 6 open reading frame 85	65	65	1	0	0	0	2.35457e-05	0.0343782
GATCATGACCAGAAGAG	s	T	4	C6orf85	63027	Chromosome 6 open reading frame 85	7	7	3	0	0	0	0.181179	0.618326
GATCTTTGGACTGACTG	s	T	1	C6orf85	63027	Chromosome 6 open reading frame 85	5	5	5	0	0	0	0.181179	0.678357
GATCACCTGCATCTGGA	s	T	1	C6orf85	63027	Chromosome 6 open reading frame 85	7	7	6	4	4	0.571429	0.630424	0.853335
GATCAAGGAAGAGATGG	s	Th	1	C6orf86	389362	Chromosome 6 open reading frame 86	0	0.9	0	33	11	36.6667	0.00119467	0.120621
GATCCCCATTTTGCAAG	s	T	1	C6orf89	221477	Chromosome 6 open reading frame 89	0	0.9	0	13	13	14.4444	0.034404	0.404659
GATCCTGCGTTGGAGAA	s	T	3	C7	730	Complement component 7	0	0.9	0	4	4	4.44444	0.290216	0.686951
GATCCGAATACACTGGC	s	T	1	C7orf10	79783	Chromosome 7 open reading frame 10	8	8	2	0	0	0	0.101495	0.618326
GATCCTTGGGCTGGCCT	s	T	1	C7orf11	136647	Chromosome 7 open reading frame 11	116	116	5	163	30	1.40517	0.130357	0.644511
GATCAGGGCTGGCGATA	s	Th	1	C7orf13	129790	Chromosome 7 open reading frame 13	11	11	11	0	0	0	0.0509456	0.433224
GATCCACCTCCGAAACC	s	T	2	C7orf24	79017	Chromosome 7 open reading frame 24	0	0.9	0	13	13	14.4444	0.034404	0.404659
GATCTTAAGTGTCTCCT	s	T	1	C7orf24	79017	Chromosome 7 open reading frame 24	22	22	6	41	18	1.86364	0.237117	0.726478
GATCCTGGGAGCCTCTG	s	T	1	C7orf26	79034	Chromosome 7 open reading frame 26	46	46	15	228	23	4.95652	1.93331e-09	0.0343782
GATCCTCTGGGGAAGCC	s	T	1	C7orf27	221927	Chromosome 7 open reading frame 27	120	120	12	136	6	1.13333	0.550918	0.854873
GATCTGAGGTTTTTAGA	s	T	1	C7orf28A	51622	Chromosome 7 open reading frame 28A	0	0.9	0	7	4	7.77778	0.134721	0.636774
GATCATCCTTGGGTCTC	s	T	4	C7orf28B	221960	Chromosome 7 open reading frame 28B	7	7	4	0	0	0	0.181179	0.618326
GATCGCTCGCACCTTGG	s	Th	4	C7orf28B	221960	Chromosome 7 open reading frame 28B	9	9	10	7	1	0.777778	0.694362	0.856964
GATCCAGGTTCCTCCAG	s	T	1	C7orf30	115416	Chromosome 7 open reading frame 30	13	13	3	54	12	4.15385	0.00557112	0.161188
GATCTGCAAGGCATAGG	s	Th	1	C7orf38	221786	Chromosome 7 open reading frame 38	5	5	2	66	18	13.2	7.72305e-05	0.0508427
GATCCAGTCTTAATTTG	s	T	1	C7orf41	222166	Chromosome 7 open reading frame 41	0	0.9	0	50	51	55.5556	7.58015e-05	0.0512997
GATCTCATGGGGCAGAT	s	Th	5	C7orf41	222166	Chromosome 7 open reading frame 41	31	31	8	0	0	0	0.0020268	0.121827
GATCTGTTATGGCATTC	s	Th	1	C7orf42	55069	Chromosome 7 open reading frame 42	44	44	5	0	0	0	0.000260508	0.0602665
GATCTTCACAACTGCCA	s	T	3	C7orf42	55069	Chromosome 7 open reading frame 42	3	3	3	4	4	1.33333	0.93679	0.848303
GATCCCTGCTCCCGGGC	s	T	1	C7orf43	55262	Chromosome 7 open reading frame 43	71	71	9	156	19	2.19718	0.00315013	0.124379
GATCAGCACAGTGCTGC	s	T	1	C7orf46	340277	Chromosome 7 open reading frame 46	37	37	12	26	3	0.702703	0.479947	0.774509
GATCCCTGGAGGGCTAG	s	Th	1	C7orf47	221908	Chromosome 7 open reading frame 47	20	20	2	130	8	6.5	6.30414e-07	0.0343782
GATCAACTCCCACTGAG	s	T	1	C7orf49	78996	Chromosome 7 open reading frame 49	0	0.9	0	28	6	31.1111	0.00277623	0.156764
GATCACGTACCTGTGCA	s	Th	1	C7orf50	84310	Chromosome 7 open reading frame 50	80	80	7	277	7	3.4625	4.68442e-09	0.0343782
GATCCCCCTGCGTGGGC	s	Th	1	C7orf50	84310	Chromosome 7 open reading frame 50	0	0.9	0	8	8	8.88889	0.0759457	0.636774
GATCCGAGATGTGGGCA	s	T	1	C7orf52	375607	Chromosome 7 open reading frame 52	0	0.9	0	19	8	21.1111	0.0180309	0.22588
GATCTGGTCAGGCAACC	s	Th	2	C7orf53	286006	Chromosome 7 open reading frame 53	34	34	1	3	4	0.0882353	0.00505762	0.127278
GATCAAGACACATGTTT	s	Th	1	C8orf13	83648	Chromosome 8 open reading frame 13	6	6	6	0	0	0	0.167517	0.678357
GATCCCAAGGTAGGATG	s	Th	1	C8orf32	55093	Chromosome 8 open reading frame 32	41	41	5	54	9	1.31707	0.387699	0.804026
GATCTGCCTAGTTTTAG	s	T	1	C8orf38	137682	Chromosome 8 open reading frame 38	5	5	1	0	0	0	0.181179	0.678357
GATCAAGATGTGGAGGA	s	Th	1	C8orf4	56892	Chromosome 8 open reading frame 4	8	8	1	72	8	9	8.75414e-05	0.0503822
GATCGGGGCCAAGACTG	s	Th	2	C8orf40	114926	Chromosome 8 open reading frame 40	22	22	4	0	0	0	0.00981802	0.173524
GATCAGAATGTCTGCTT	s	Th	4	C8orf53	84294	Chromosome 8 open reading frame 53	6	6	3	0	0	0	0.167517	0.678357
GATCCCCACCCTTTCTG	s	T	1	C8orf55	51337	Chromosome 8 open reading frame 55	55	55	19	46	31	0.836364	0.67134	0.83112
GATCAGTGCATTGAACA	s	Th	1	C8orf57	84257	Chromosome 8 open reading frame 57	5	5	5	30	1	6	0.0283852	0.237341
GATCTTCACGATTACCG	s	T	1	C8orf70	51101	Chromosome 8 open reading frame 70	10	10	0	6	5	0.6	0.747054	0.810937
GATCACACCTGGGGGTC	s	Th	1	C8orf73	642475	Chromosome 8 open reading frame 73	9	9	3	0	0	0	0.0909465	0.433224
GATCGGCATTCCCCTGC	s	Th	1	C8orf76	84933	Chromosome 8 open reading frame 76	17	17	5	0	0	0	0.0168196	0.231134
GATCTAGTCTGTCCTGT	s	T	1	C8orf77	286103	Chromosome 8 open reading frame 77	0	0.9	0	6	6	6.66667	0.134721	0.686951
GATCCTGAAAGCCAAGG	s	T	4	C9orf100	84904	Chromosome 9 open reading frame 100	0	0.9	0	4	4	4.44444	0.290216	0.686951
GATCGGCCAAGTATGCT	s	Th	1	C9orf102	56959	Chromosome 9 open reading frame 102	3	3	0	15	4	5	0.0904397	0.606819
GATCAGAGGAAATTCTG	s	Th	1	C9orf103	414328	Chromosome 9 open reading frame 103	0	0.9	0	67	6	74.4444	2.66252e-06	0.0343782
GATCTGTCCTCTAACTT	s	T	1	C9orf114	51490	Chromosome 9 open reading frame 114	0	0.9	0	13	13	14.4444	0.034404	0.404659
GATCCGAGGTGTCACCA	s	T	1	C9orf119	375757	Chromosome 9 open reading frame 119	144	144	9	19	0	0.131944	2.13119e-07	0.0343782
GATCCTTTGGAATTGAG	s	Th	1	C9orf125	84302	Chromosome 9 open reading frame 125	5	5	1	0	0	0	0.167517	0.678357
GATCTTGGCCACAGCCT	s	Th	3	C9orf127	51754	Chromosome 9 open reading frame 127	12	12	13	0	0	0	0.0509456	0.399179
GATCCTGACTCAAAAAG	s	T	3	C9orf130	286354	Chromosome 9 open reading frame 130	27	27	1	0	0	0	0.00748908	0.129606
GATCCTGGCTAGAAGTG	s	T	1	C9orf130	286354	Chromosome 9 open reading frame 130	7	7	4	0	0	0	0.181179	0.618326
GATCCCCAGAGAGGTGG	s	Th	1	C9orf142	286257	Chromosome 9 open reading frame 142	195	195	1	543	14	2.78462	7.12763e-13	0.0343782
GATCAACTCCTGTCTGG	s	T	1	C9orf16	79095	Chromosome 9 open reading frame 16	629	629	23	175	0	0.278219	0	0.0343782
GATCGCAGGGAACAGGT	s	Th	1	C9orf163	158055	Chromosome 9 open reading frame 163	25	25	1	0	0	0	0.00577204	0.161136
GATCTGGGAGTGCATCT	s	Th	1	C9orf164	349236	Chromosome 9 open reading frame 164	8	8	8	0	0	0	0.0909465	0.618326
GATCCCAGAGTTCAGCC	s	Th	1	C9orf165	375704	Chromosome 9 open reading frame 165	244	244	15	323	4	1.32377	0.0570545	0.606405
GATCTCTTTGAAACGAA	s	T	1	C9orf166	642968	Chromosome 9 open reading frame 166	27	27	1	0	0	0	0.00748908	0.129606
GATCGTGAAGACCTGCT	s	Th	1	C9orf23	138716	Chromosome 9 open reading frame 23	80	80	27	110	13	1.375	0.22185	0.741722
GATCAACATCCCCCCAA	s	T	1	C9orf25	203259	Chromosome 9 open reading frame 25	17	17	16	0	0	0	0.0344982	0.231134
GATCTGGAGTGGAGCTG	s	T	1	C9orf3	84909	Chromosome 9 open reading frame 3	46	46	12	15	3	0.326087	0.0337667	0.36968
GATCAGGATGCAGAGGT	s	Th	4	C9orf3	84909	Chromosome 9 open reading frame 3	5	5	5	0	0	0	0.167517	0.678357
GATCAGGCCATGGGTGT	s	Th	4	C9orf3	84909	Chromosome 9 open reading frame 3	6	6	3	0	0	0	0.167517	0.678357
GATCATACACTGTTACA	s	Th	1	C9orf3	84909	Chromosome 9 open reading frame 3	0	0.9	0	5	5	5.55556	0.147326	0.686951
GATCGCCAGCATGCTGC	s	Th	2	C9orf30	91283	Chromosome 9 open reading frame 30	53	53	8	31	7	0.584906	0.22203	0.646502
GATCAGGAAACTTGACC	s	T	5	C9orf5	23731	Chromosome 9 open reading frame 5	46	46	2	0	0	0	0.000403622	0.0602665
GATCTGAAATCTTCAGT	s	T	1	C9orf5	23731	Chromosome 9 open reading frame 5	5	5	1	0	0	0	0.181179	0.678357
GATCCCCACTCATTCCA	s	T	3	C9orf58	83543	Chromosome 9 open reading frame 58	3	3	3	24	9	8	0.0224139	0.234225
GATCTGGCCTGCCCATG	s	T	1	C9orf6	54942	Chromosome 9 open reading frame 6	20	20	19	0	0	0	0.0205587	0.216203
GATCTGGGCTGCACACA	s	Th	4	C9orf61	9413	Chromosome 9 open reading frame 61	0	0.9	0	97	14	107.778	2.00256e-08	0.0343782
GATCTGCCGGGCTGCTA	s	Th	1	C9orf61	9413	Chromosome 9 open reading frame 61	150	150	21	18	4	0.12	3.05652e-08	0.0343782
GATCCTCTTCTTCCTCT	s	Th	1	C9orf61	9413	Chromosome 9 open reading frame 61	8	8	2	0	0	0	0.0909465	0.618326
GATCTTATCTCACGCTG	s	Th	1	C9orf69	90120	Chromosome 9 open reading frame 69	34	34	2	28	3	0.823529	0.734956	0.837123
GATCAAGGAAGGCTGCC	s	Th	1	C9orf7	11094	Chromosome 9 open reading frame 7	0	0.9	0	144	38	160	1.07561e-11	0.0343782
GATCTTTTTCCATCCAG	s	T	1	C9orf72	203228	Chromosome 9 open reading frame 72	0	0.9	0	15	15	16.6667	0.034404	0.383968
GATCCGGCTCAGAGGAG	s	T	1	C9orf75	286262	Chromosome 9 open reading frame 75	227	227	17	110	3	0.484581	0.00075688	0.0629759
GATCACGCTGAGCAGCA	s	Th	3	C9orf80	58493	Chromosome 9 open reading frame 80	6	6	3	48	1	8	0.00113701	0.0981535
GATCAGACACACAGCGC	s	Th	3	C9orf86	55684	Chromosome 9 open reading frame 86	133	133	19	116	14	0.87218	0.56761	0.811387
GATCTGATGTCCTCGCC	s	Th	1	C9orf86	55684	Chromosome 9 open reading frame 86	6	6	6	5	5	0.833333	0.961189	0.883973
GATCCTTACCAACAAGG	s	T	1	C9orf89	84270	Chromosome 9 open reading frame 89	8	8	1	97	6	12.125	4.65886e-06	0.0343782
GATCGCCCACTCCGAGA	s	Th	1	C9orf9	11092	Chromosome 9 open reading frame 9	5	5	2	7	3	1.4	0.961189	0.85689
GATCTGCTGCTTCCAAG	s	Th	1	C9orf91	203197	Chromosome 9 open reading frame 91	0	0.9	0	8	8	8.88889	0.0759457	0.636774
GATCAGGACTGGCGGGA	s	Th	4	C9orf97	158427	Chromosome 9 open reading frame 97	12	12	3	0	0	0	0.0509456	0.399179
GATCCATTTGCTGTTTC	s	T	1	CA10	56934	Carbonic anhydrase X	0	0.9	0	48	17	53.3333	0.000137089	0.0602665
GATCTTCCAGAGCCTCA	s	Th	1	CA11	770	Carbonic anhydrase XI	626	626	5	102	5	0.162939	0	0.0343782
GATCTACCTTGGTGATT	s	T	1	CA2	760	Carbonic anhydrase II	126	126	2	95	15	0.753968	0.291974	0.685487
GATCCTGGCATTCTCTC	s	Th	1	CA4	762	Carbonic anhydrase IV	5	5	5	0	0	0	0.167517	0.678357
GATCCCGGCTTAAAACC	s	Th	4	CA5BL	340591	Carbonic anhydrase VB-like	34	34	7	0	0	0	0.00120832	0.0929818
GATCCACTGGAACTCCA	s	T	1	CA8	767	Carbonic anhydrase VIII	8	8	2	2	2	0.25	0.373777	0.779415
GATCCACAACCTGATTC	s	T	1	CABC1	56997	Chaperone, ABC1 activity of bc1 complex homolog (S. pombe)	55	55	19	9	9	0.163636	0.00391824	0.107038
GATCCACTACCACAACC	s	T	1	CABIN1	23523	Calcineurin binding protein 1	10	10	10	0	0	0	0.101495	0.433224
GATCACCGTCACGCCAC	s	T	1	CABIN1	23523	Calcineurin binding protein 1	144	144	6	150	43	1.04167	0.848439	0.861191
GATCCAGCCAAGCACTG	s	T	3	CABIN1	23523	Calcineurin binding protein 1	5	5	5	6	6	1.2	0.910701	0.883973
GATCACAGATTTCCCTG	s	Th	1	CABLES1	91768	Cdk5 and Abl enzyme substrate 1	123	123	12	0	0	0	6.7385e-10	0.0343782
GATCTGTTCCAACTTGG	s	T	1	CABLES1	91768	Cdk5 and Abl enzyme substrate 1	15	15	1	4	0	0.266667	0.13408	0.673901
GATCCCATCTCAAGAGC	s	Th	3	CABLES2	81928	Cdk5 and Abl enzyme substrate 2	31	31	11	93	1	3	0.0013966	0.123459
GATCAACATGAACCTGG	s	Th	1	CABP1	9478	Calcium binding protein 1	428	428	38	130	5	0.303738	3.18034e-12	0.0343782
GATCCAGAAATGACGCT	s	Th	1	CABYR	26256	Calcium binding tyrosine-(Y)-phosphorylation regulated	5	5	2	8	1	1.6	0.615841	0.85689
GATCTGGGAGCTACAGA	s	Th	1	CACHD1	57685	Cache domain containing 1	30	30	16	0	0	0	0.0020268	0.121827
GATCCCCCCACCCACGA	s	T	4	CACNA1A	773	Calcium channel, voltage-dependent, P/Q type, alpha 1A subunit	128	128	23	110	3	0.859375	0.535651	0.806412
GATCACTGTGCTCCTGT	s	Th	1	CACNA1B	774	Calcium channel, voltage-dependent, N type, alpha 1B subunit	28	28	4	0	0	0	0.00341255	0.129606
GATCCCTGTGGGGCGGT	s	T	2	CACNA1B	774	Calcium channel, voltage-dependent, N type, alpha 1B subunit	20	20	6	0	0	0	0.0205587	0.216203
GATCTGAATCTGGGGCC	s	Th	3	CACNA1C	775	Calcium channel, voltage-dependent, L type, alpha 1C subunit	59	59	4	7	6	0.118644	0.000319069	0.0709147
GATCCCAGAAAGGGCAC	s	Th	3	CACNA1C	775	Calcium channel, voltage-dependent, L type, alpha 1C subunit	14	14	14	0	0	0	0.0290848	0.372717
GATCTGGCCCAAGAACC	s	Th	4	CACNA1C	775	Calcium channel, voltage-dependent, L type, alpha 1C subunit	0	0.9	0	16	5	17.7778	0.021955	0.383968
GATCATCACACCTGTGT	s	T	4	CACNA1D	776	Calcium channel, voltage-dependent, L type, alpha 1D subunit	8	8	1	2	2	0.25	0.373777	0.779415
GATCCTGCAGAGCCTGG	s	Th	2	CACNA1H	8912	Calcium channel, voltage-dependent, T type, alpha 1H subunit	34	34	1	21	3	0.617647	0.400979	0.692189
GATCCACTGGCCAGGAC	s	T	1	CACNA1I	8911	Calcium channel, voltage-dependent, T type, alpha 1I subunit	40	40	2	15	15	0.375	0.0752627	0.405776
GATCCGAACATCTGTCT	s	T	3	CACNA2D1	781	Calcium channel, voltage-dependent, alpha 2/delta subunit 1	12	12	1	0	0	0	0.0586249	0.399179
GATCGAGGGAGCTGTGA	s	Th	2	CACNA2D3	55799	Calcium channel, voltage-dependent, alpha 2/delta 3 subunit	16	16	4	0	0	0	0.0290848	0.372717
GATCGAAGGGCATTCTT	s	Th	1	CACNA2D3	55799	Calcium channel, voltage-dependent, alpha 2/delta 3 subunit	0	0.9	0	11	12	12.2222	0.0404366	0.594545
GATCCCAGGAGACAACA	s	Th	1	CACNA2D4	93589	Calcium channel, voltage-dependent, alpha 2/delta subunit 4	5	5	5	0	0	0	0.167517	0.678357
GATCCAAGGTCCCTCAC	s	T	5	CACNB1	782	Calcium channel, voltage-dependent, beta 1 subunit	83	83	23	6	6	0.0722892	3.44458e-05	0.0343782
GATCTCCTCTGGGGGGC	s	T	4	CACNB1	782	Calcium channel, voltage-dependent, beta 1 subunit	121	121	0	37	7	0.305785	0.000370589	0.0606868
GATCCTGGGAGGACGAG	s	T	4	CACNB1	782	Calcium channel, voltage-dependent, beta 1 subunit	13	13	4	0	0	0	0.0586249	0.399179
GATCCAGACCCACTGGT	s	T	3	CACNB1	782	Calcium channel, voltage-dependent, beta 1 subunit	10	10	4	2	2	0.2	0.373777	0.688701
GATCCCCTTAGCAGGGT	s	T	1	CACNB3	784	Calcium channel, voltage-dependent, beta 3 subunit	294	294	10	17	6	0.0578231	4.44089e-16	0.0343782
GATCACCATGGGGACCC	s	Th	1	CACNG3	10368	Calcium channel, voltage-dependent, gamma subunit 3	56	56	5	0	0	0	3.46402e-05	0.0406889
GATCTGAAATGAGGCCT	s	T	1	CACNG4	27092	Calcium channel, voltage-dependent, gamma subunit 4	18	18	2	334	26	18.5556	0	0.0343782
GATCCACCCTGGAACAG	s	T	5	CACNG4	27092	Calcium channel, voltage-dependent, gamma subunit 4	0	0.9	0	4	4	4.44444	0.290216	0.686951
GATCTACAGCCGCAAGA	s	T	4	CACNG4	27092	Calcium channel, voltage-dependent, gamma subunit 4	7	7	0	7	4	1	0.910701	0.875747
GATCCTAGTGAGGGATT	s	Th	1	CACYBP	27101	Calcyclin binding protein	42	42	6	8	8	0.190476	0.010217	0.161245
GATCACGATGGTGGGTG	s	Th	2	CAD	790	Carbamoyl-phosphate synthetase 2, aspartate transcarbamylase, and dihydroorotase	5	5	5	5	5	1	0.961189	0.883973
GATCAGCCTTTTTGTTT	s	Th	4	CADM1	23705	Cell adhesion molecule 1	5	5	2	0	0	0	0.167517	0.678357
GATCGGTGGCGTCGTGG	s	Th	1	CADM1	23705	Cell adhesion molecule 1	2	2	2	5	5	2.5	0.535479	0.848303
GATCGAGCTGGTTCGCG	s	Th	5	CADM2	253559	Cell adhesion molecule 2	5	5	5	0	0	0	0.167517	0.678357
GATCCGGCACAAAGGAA	s	T	3	CADM3	57863	Cell adhesion molecule 3	33	33	5	7	8	0.212121	0.0341076	0.242554
GATCACCTGGAGAAAGG	s	Th	5	CADM3	57863	Cell adhesion molecule 3	5	5	5	0	0	0	0.167517	0.678357
GATCCGCTGGAACCGCG	s	T	1	CADM4	199731	Cell adhesion molecule 4	0	0.9	0	6	6	6.66667	0.134721	0.686951
GATCTCTGTAAGGGCCA	s	Th	1	CADM4	199731	Cell adhesion molecule 4	16	16	7	28	14	1.75	0.245881	0.754884
GATCCATCTTGCTTTTG	s	Th	1	CADPS	8618	Ca2+-dependent secretion activator	64	64	10	25	0	0.390625	0.0223843	0.237966
GATCCGGAACCGTCTCA	s	T	4	CADPS	8618	Ca2+-dependent secretion activator	12	12	5	0	0	0	0.0586249	0.399179
GATCAATGGTACAGCAG	s	Th	1	CADPS2	93664	Ca2+-dependent activator protein for secretion 2	6	6	6	0	0	0	0.167517	0.678357
GATCGTTCTGGGTCAGC	s	Th	1	CALB1	793	Calbindin 1, 28kDa	19	19	6	0	0	0	0.0168196	0.216203
GATCACACACATGGAAG	s	Th	1	CALB2	794	Calbindin 2, 29kDa (calretinin)	87	87	3	0	0	0	2.41607e-07	0.0343782
GATCTTACTCCCTCGTA	s	Th	1	CALCOCO1	57658	Calcium binding and coiled-coil domain 1	30	30	3	0	0	0	0.0020268	0.121827
GATCTGTCCACTTCAGC	s	T	1	CALCOCO2	10241	Calcium binding and coiled-coil domain 2	37	37	2	0	0	0	0.00171353	0.073078
GATCTGAAGGTCACTGT	s	Th	1	CALCOCO2	10241	Calcium binding and coiled-coil domain 2	2	2	2	43	16	21.5	0.00096987	0.0961818
GATCAAAAGGGCTATGG	s	Th	1	CALCOCO2	10241	Calcium binding and coiled-coil domain 2	12	12	0	8	8	0.666667	0.753745	0.827468
GATCTACTCATTTGCTG	s	T	1	CALCRL	10203	Calcitonin receptor-like	0	0.9	0	7	4	7.77778	0.134721	0.636774
GATCAGTTCAGAAGAGC	s	Th	4	CALD1	800	Caldesmon 1	11	11	2	0	0	0	0.0509456	0.433224
GATCGCTCCAATAAACA	s	Th	1	CALD1	800	Caldesmon 1	8	8	2	0	0	0	0.0909465	0.618326
GATCGCATGGAAGACGC	s	Th	3	CALD1	800	Caldesmon 1	14	14	1	7	7	0.5	0.284682	0.778147
GATCCTGGCCATACAAG	s	Th	4	CALM1	801	Calmodulin 1 (phosphorylase kinase, delta)	89	89	2	8	9	0.0898876	8.20187e-06	0.0343782
GATCAGAGAAGCAGATA	s	Th	2	CALM1	801	Calmodulin 1 (phosphorylase kinase, delta)	222	222	33	41	5	0.184685	1.01525e-09	0.0343782
GATCAATGAAGTGGATG	s	Th	4	CALM1	801	Calmodulin 1 (phosphorylase kinase, delta)	56	56	2	0	0	0	3.46402e-05	0.0406889
GATCAGCTGACCGAAGA	s	Th	4	CALM1	801	Calmodulin 1 (phosphorylase kinase, delta)	20	20	5	0	0	0	0.00981802	0.216203
GATCGTGTCTGGGAACC	s	T	5	CALM1	801	Calmodulin 1 (phosphorylase kinase, delta)	10	10	0	0	0	0	0.101495	0.433224
GATCAAGCTACACATCA	s	Th	1	CALM1	801	Calmodulin 1 (phosphorylase kinase, delta)	186	186	33	153	29	0.822581	0.314638	0.736174
GATCCTGTCTGGGAACC	s	T	5	CALM1	801	Calmodulin 1 (phosphorylase kinase, delta)	15	15	6	15	4	1	0.86845	0.868082
GATCTCTTGGGCAGAAT	s	Th	2	CALM2	805	Calmodulin 2 (phosphorylase kinase, delta)	47	47	14	0	0	0	0.000156916	0.0512997
GATCGGGCGGATTGAGG	s	Th	1	CALM2	805	Calmodulin 2 (phosphorylase kinase, delta)	964	964	10	731	793	0.758299	0.00152539	0.0723072
GATCAAGTAACATGTTG	s	Th	1	CALM2	805	Calmodulin 2 (phosphorylase kinase, delta)	0	0.9	0	41	38	45.5556	0.000220483	0.0725022
GATCCGTGCCCTTGCTT	s	T	4	CALM3	808	Calmodulin 3 (phosphorylase kinase, delta)	111	111	23	0	0	0	3.53055e-08	0.0343782
GATCATGCTCTCCGCTG	s	T	1	CALM3	808	Calmodulin 3 (phosphorylase kinase, delta)	126	126	5	4	0	0.031746	2.35615e-08	0.0343782
GATCCCAGCAGCCTGTT	s	Th	4	CALM3	808	Calmodulin 3 (phosphorylase kinase, delta)	16	16	15	141	29	8.8125	1.56066e-08	0.0343782
GATCTCTCTCTTCTCGC	s	Th	1	CALM3	808	Calmodulin 3 (phosphorylase kinase, delta)	551	551	5	225	22	0.408348	7.67721e-11	0.0343782
GATCAAGTGGCTTTTCC	s	Th	1	CALM3	808	Calmodulin 3 (phosphorylase kinase, delta)	1412	1412	79	130	120	0.092068	0	0.0343782
GATCCCCTTGGGGAGCC	s	T	2	CALM3	808	Calmodulin 3 (phosphorylase kinase, delta)	32	32	13	0	0	0	0.00279045	0.0977861
GATCCCCTTGGGGAGGG	s	T	5	CALM3	808	Calmodulin 3 (phosphorylase kinase, delta)	0	0.9	0	13	2	14.4444	0.034404	0.404659
GATCAAGAAAGATGAGA	s	Th	1	CALR	811	Calreticulin	5	5	1	0	0	0	0.167517	0.678357
GATCAACATCTTTTCTT	s	Th	1	CALR	811	Calreticulin	20	20	7	26	5	1.3	0.724455	0.857014
GATCCTCTGCGTGGGAG	s	T	1	CAMK1	8536	Calcium/calmodulin-dependent protein kinase I	204	204	20	98	23	0.480392	0.00143749	0.0711841
GATCACCATCACCGAGG	s	T	1	CAMK1G	57172	Calcium/calmodulin-dependent protein kinase IG	43	43	12	0	0	0	0.000651958	0.0620318
GATCCTGATGCGGCAGG	s	T	1	CAMK2A	815	Calcium/calmodulin-dependent protein kinase (CaM kinase) II alpha	1067	1067	59	234	9	0.219306	0	0.0343782
GATCTGTCTTGGGCTGT	s	Th	4	CAMK2A	815	Calcium/calmodulin-dependent protein kinase (CaM kinase) II alpha	78	78	7	46	13	0.589744	0.10739	0.599262
GATCCTAAACTCCAAGG	s	Th	4	CAMK2B	816	Calcium/calmodulin-dependent protein kinase (CaM kinase) II beta	270	270	11	66	22	0.244444	4.74679e-10	0.0343782
GATCATTAAGACCACGG	s	Th	4	CAMK2B	816	Calcium/calmodulin-dependent protein kinase (CaM kinase) II beta	108	108	8	38	5	0.351852	0.00142678	0.0930393
GATCAAGGCTGGTGCCT	s	Th	4	CAMK2B	816	Calcium/calmodulin-dependent protein kinase (CaM kinase) II beta	12	12	3	2	2	0.166667	0.197872	0.642973
GATCCACACGACCATCC	s	T	3	CAMK2B	816	Calcium/calmodulin-dependent protein kinase (CaM kinase) II beta	154	154	14	152	22	0.987013	0.908787	0.860725
GATCAAGTTTGTCTTCC	s	Th	1	CAMK2D	817	Calcium/calmodulin-dependent protein kinase (CaM kinase) II delta	231	231	2	54	9	0.233766	9.20266e-09	0.0343782
GATCGAAGCTATCAACA	s	Th	1	CAMK2D	817	Calcium/calmodulin-dependent protein kinase (CaM kinase) II delta	3	3	3	15	1	5	0.0904397	0.606819
GATCAAGGGCTCCACAG	s	Th	4	CAMK2G	818	Calcium/calmodulin-dependent protein kinase (CaM kinase) II gamma	9	9	3	0	0	0	0.0909465	0.433224
GATCCAGGCCTCACTTC	s	Th	4	CAMK2G	818	Calcium/calmodulin-dependent protein kinase (CaM kinase) II gamma	47	47	5	41	2	0.87234	0.803101	0.845372
GATCGGCCGGAGCAAGC	s	Th	1	CAMK2N1	55450	Calcium/calmodulin-dependent protein kinase II inhibitor 1	2896	2896	76	768	53	0.265193	0	0.0343782
GATCGGCTGCCGGCCGT	s	T	4	CAMK2N1	55450	Calcium/calmodulin-dependent protein kinase II inhibitor 1	17	17	4	0	0	0	0.0344982	0.231134
GATCCGATTTTACCTTG	s	Th	1	CAMK2N2	94032	Calcium/calmodulin-dependent protein kinase II inhibitor 2	31	31	10	120	9	3.87097	4.01959e-05	0.0503822
GATCGGACCCACCCTTG	s	Th	1	CAMKK1	84254	Calcium/calmodulin-dependent protein kinase kinase 1, alpha	98	98	14	30	2	0.306122	0.000587469	0.0743581
GATCGATTCAATGCCCG	s	Th	1	CAMKK2	10645	Calcium/calmodulin-dependent protein kinase kinase 2, beta	239	239	12	62	68	0.259414	1.32421e-08	0.0343782
GATCACTGCAGAAGAGG	s	Th	1	CAMKV	79012	CaM kinase-like vesicle-associated	214	214	91	0	0	0	4.44089e-16	0.0343782
GATCCACTTTGCTTTCT	s	T	1	CAMSAP1	157922	Calmodulin regulated spectrin-associated protein 1	17	17	6	33	3	1.94118	0.200348	0.736201
GATCCTGAGAAGCAGTG	s	T	5	CAMSAP1L1	23271	Calmodulin regulated spectrin-associated protein 1-like 1	8	8	2	0	0	0	0.101495	0.618326
GATCCACAGAGCTGGAG	s	T	1	CAMTA1	23261	Calmodulin binding transcription activator 1	2	2	2	108	2	54	5.73146e-08	0.0343782
GATCAGTGTGGTGCTGC	s	Th	3	CAMTA1	23261	Calmodulin binding transcription activator 1	250	250	21	89	13	0.356	1.09537e-06	0.0343782
GATCCCCTGACCTGCAT	s	T	1	CAMTA1	23261	Calmodulin binding transcription activator 1	65	65	24	330	33	5.07692	5.82423e-13	0.0343782
GATCTGTTGAAGAACTC	s	T	1	CAMTA1	23261	Calmodulin binding transcription activator 1	25	25	6	54	8	2.16	0.0834759	0.432176
GATCATGAGATTCCTGC	s	T	1	CAMTA2	23125	Calmodulin binding transcription activator 2	227	227	6	52	1	0.229075	3.10178e-08	0.0343782
GATCCAGAGCAAGTTCC	s	T	1	CAMTA2	23125	Calmodulin binding transcription activator 2	0	0.9	0	4	0	4.44444	0.290216	0.686951
GATCAGTTCTAACCCTG	s	Th	1	CAND1	55832	Cullin-associated and neddylation-dissociated 1	48	48	12	13	4	0.270833	0.0100152	0.212143
GATCTGTGCTGGGGAAC	s	Th	1	CAND1	55832	Cullin-associated and neddylation-dissociated 1	111	111	15	133	28	1.1982	0.433321	0.82311
GATCAGGAGGCAGCAGA	s	Th	1	CAND2	23066	Cullin-associated and neddylation-dissociated 2 (putative)	30	30	1	0	0	0	0.0020268	0.121827
GATCAGCTCCATGACAA	s	Th	5	CANX	821	Calnexin	0	0.9	0	46	27	51.1111	0.000126201	0.0620318
GATCCCCAGCTTTCTCC	s	T	1	CANX	821	Calnexin	38	38	13	24	5	0.631579	0.36575	0.774509
GATCGTTCATTGCCTTT	s	T	1	CANX	821	Calnexin	161	161	28	186	4	1.15528	0.510103	0.835424
GATCCCTGCCCAGCACC	s	Th	1	CAP1	10487	CAP, adenylate cyclase-associated protein 1 (yeast)	148	148	6	335	80	2.26351	2.49299e-06	0.0343782
GATCCAAGTTAATCACT	s	Th	2	CAP2	10486	CAP, adenylate cyclase-associated protein, 2 (yeast)	9	9	0	0	0	0	0.0909465	0.433224
GATCCTTGCTGGGGACG	s	T	2	CAP2	10486	CAP, adenylate cyclase-associated protein, 2 (yeast)	5	5	5	0	0	0	0.181179	0.678357
GATCTATATCTGGAAGG	s	Th	1	CAPG	822	Capping protein (actin filament), gelsolin-like	5	5	2	21	3	4.2	0.0818301	0.60678
GATCTGGATGGAGTTGT	s	Th	1	CAPN1	823	Calpain 1, (mu/I) large subunit	127	127	18	30	2	0.23622	1.33198e-05	0.0388462
GATCAACTGAACCAGTA	s	T	1	CAPN2	824	Calpain 2, (m/II) large subunit	91	91	9	180	1	1.97802	0.00386236	0.13053
GATCCACCACAGGGTTA	s	Th	1	CAPN5	726	Calpain 5	0	0.9	0	126	35	140	1.57133e-10	0.0343782
GATCATCAAGTGTGAGG	s	Th	3	CAPN5	726	Calpain 5	3	3	0	25	3	8.33333	0.0160827	0.234225
GATCCTGTCTGGAGTCA	s	T	4	CAPNS1	826	Calpain, small subunit 1	0	0.9	0	74	20	82.2222	2.24757e-06	0.0343782
GATCCTGTCTGCAGTCA	s	Th	1	CAPNS1	826	Calpain, small subunit 1	58	58	10	28	4	0.482759	0.0781241	0.421618
GATCTTCAGCTTGGTAG	s	T	1	CAPRIN2	65981	Caprin family member 2	5	5	5	0	0	0	0.181179	0.678357
GATCCCCCCAGCCCCCC	s	Th	5	CAPS	828	Calcyphosine	0	0.9	0	30	32	33.3333	0.00211292	0.127163
GATCCCCGCACCCGGAC	s	T	1	CAPS	828	Calcyphosine	46	46	9	72	4	1.56522	0.174581	0.667089
GATCATTTTAGTGTCTT	s	Th	2	CAPZA2	830	Capping protein (actin filament) muscle Z-line, alpha 2	17	17	1	8	1	0.470588	0.353765	0.734404
GATCCCAGGGGCACTTG	s	Th	1	CAPZB	832	Capping protein (actin filament) muscle Z-line, beta	20	20	5	0	0	0	0.00981802	0.216203
GATCCAGCCAAGACCTG	s	T	5	CAPZB	832	Capping protein (actin filament) muscle Z-line, beta	0	0.9	0	20	6	22.2222	0.00957784	0.22588
GATCTACATCCAGCCTG	s	T	5	CAPZB	832	Capping protein (actin filament) muscle Z-line, beta	5	5	2	0	0	0	0.181179	0.678357
GATCCAGGTCTGTGCAG	s	T	2	CAPZB	832	Capping protein (actin filament) muscle Z-line, beta	139	139	2	137	1	0.985612	0.948166	0.86073
GATCCTGAGCGAGAAAC	s	Th	2	CARD14	79092	Caspase recruitment domain family, member 14	28	28	5	0	0	0	0.00341255	0.129606
GATCTTGCCTCCCATCA	s	Th	1	CARHSP1	23589	Calcium regulated heat stable protein 1, 24kDa	11	11	11	0	0	0	0.0509456	0.433224
GATCTGTCACGGAAGGC	s	Th	1	CARM1	10498	Coactivator-associated arginine methyltransferase 1	183	183	14	220	7	1.20219	0.324075	0.794515
GATCGGGAAGCTGTGTG	s	Th	1	CARTPT	9607	CART prepropeptide	36	36	10	0	0	0	0.000722659	0.0929818
GATCTTGCTGGAGGCGA	s	Th	1	CASC2	255082	Cancer susceptibility candidate 2	20	20	2	0	0	0	0.00981802	0.216203
GATCTGCTTTAAGACTG	s	T	1	CASC2	255082	Cancer susceptibility candidate 2	0	0.9	0	20	5	22.2222	0.00957784	0.22588
GATCAGCATTGTGACTT	s	T	1	CASC3	22794	Cancer susceptibility candidate 3	121	121	10	156	41	1.28926	0.28827	0.751578
GATCCACTGCAGTTCCA	s	T	2	CASC3	22794	Cancer susceptibility candidate 3	2	2	2	4	4	2	0.93679	0.848303
GATCTGTTTCCCATGAA	s	T	1	CASC5	57082	Cancer susceptibility candidate 5	0	0.9	0	59	13	65.5556	2.33168e-05	0.0406889
GATCCCACAAGTCCTAA	s	Th	3	CASKIN2	57513	CASK interacting protein 2	6	6	3	51	4	8.5	0.000663967	0.0931773
GATCCCGGCTGCTTGGA	s	T	2	CASP6	839	Caspase 6, apoptosis-related cysteine peptidase	0	0.9	0	63	1	70	1.29653e-05	0.0388462
GATCATCCAGAGGAGCT	s	T	1	CASP7	840	Caspase 7, apoptosis-related cysteine peptidase	5	5	5	24	6	4.8	0.0661315	0.401082
GATCAGCAAACCGGGGC	s	Th	1	CASP9	842	Caspase 9, apoptosis-related cysteine peptidase	12	12	12	44	8	3.66667	0.0138557	0.236608
GATCAAGCACTCGAGGC	s	Th	1	CAST	831	Calpastatin	8	8	2	28	10	3.5	0.0692377	0.42682
GATCAGCTGAACAGCAG	s	T	2	CAST	831	Calpastatin	8	8	2	15	15	1.875	0.598244	0.793075
GATCTCACTTGGCGGCA	s	Th	1	CAT	847	Catalase	30	30	3	7	3	0.233333	0.026026	0.388258
GATCTGCCGGGTGCTGA	s	Th	3	CATSPER2	117155	Cation channel, sperm associated 2	30	30	10	71	1	2.36667	0.0238434	0.382459
GATCAACCATCGCTTTA	s	Th	4	CAV1	857	Caveolin 1, caveolae protein, 22kDa	0	0.9	0	43	0	47.7778	0.000220483	0.0696973
GATCTGTGTTAGTCCCT	s	Th	1	CBARA1	10367	Calcium binding atopy-related autoantigen 1	75	75	18	113	19	1.50667	0.105347	0.651066
GATCCGCTCAGGCACGG	s	T	1	CBFA2T2	9139	Core-binding factor, runt domain, alpha subunit 2; translocated to, 2	141	141	7	147	21	1.04255	0.856298	0.871327
GATCAGCGAAGACGGGA	s	T	2	CBFA2T3	863	Core-binding factor, runt domain, alpha subunit 2; translocated to, 3	10	10	0	28	10	2.8	0.0898995	0.618367
GATCCTGAACTGGTCTA	s	Th	1	CBL	867	Cas-Br-M (murine) ecotropic retroviral transforming sequence	0	0.9	0	31	34	34.4444	0.00119467	0.127163
GATCTCCTGATTTGGCA	s	T	4	CBL	867	Cas-Br-M (murine) ecotropic retroviral transforming sequence	10	10	10	0	0	0	0.101495	0.433224
GATCGTGAAATCTAAGG	s	Th	1	CBLN1	869	Cerebellin 1 precursor	17	17	10	0	0	0	0.0168196	0.231134
GATCTGCCCAGGAAAGG	s	T	1	CBLN2	147381	Cerebellin 2 precursor	65	65	18	0	0	0	2.35457e-05	0.0343782
GATCTGTGCTGTCTTAT	s	T	1	CBLN3	643866	Cerebellin 3 precursor	13	13	4	0	0	0	0.0586249	0.399179
GATCATAAATCTGACAA	s	T	1	CBLN4	140689	Cerebellin 4 precursor	25	25	7	0	0	0	0.00748908	0.161136
GATCCTCCTGAATGCCT	s	T	1	CBR1	873	Carbonyl reductase 1	35	35	10	41	10	1.17143	0.792528	0.860332
GATCCTGGCCAGGCGTC	s	Th	1	CBR3	874	Carbonyl reductase 3	20	20	5	51	9	2.55	0.046162	0.406112
GATCCAGTACCACAGCA	s	Th	4	CBS	875	Cystathionine-beta-synthase	0	0.9	0	7	6	7.77778	0.147326	0.636774
GATCGACTTTGTGTCTC	s	Th	3	CBS	875	Cystathionine-beta-synthase	30	30	4	48	2	1.6	0.261874	0.752037
GATCAAGTTTGTACATA	s	Th	1	CBWD1	55871	COBW domain containing 1	41	41	5	0	0	0	0.000433378	0.0699457
GATCCCAGTCACAATTA	s	Th	1	CBWD1	55871	COBW domain containing 1	25	25	1	44	8	1.76	0.1634	0.675988
GATCCAAGAGTTTAGTG	s	Th	1	CBX1	10951	Chromobox homolog 1 (HP1 beta homolog Drosophila )	17	17	2	0	0	0	0.0168196	0.231134
GATCCTGGCACGCTGAG	s	T	1	CBX2	84733	Chromobox homolog 2 (Pc class homolog, Drosophila)	0	0.9	0	132	23	146.667	2.2185e-10	0.0343782
GATCGACGTGTAGTGAA	s	Th	3	CBX3	11335	Chromobox homolog 3 (HP1 gamma homolog, Drosophila)	0	0.9	0	128	17	142.222	1.57133e-10	0.0343782
GATCGCCTTCCAGAACA	s	T	4	CBX4	8535	Chromobox homolog 4 (Pc class homolog, Drosophila)	0	0.9	0	7	4	7.77778	0.134721	0.636774
GATCTCTTCCTTCTGCT	s	Th	3	CBX5	23468	Chromobox homolog 5 (HP1 alpha homolog, Drosophila)	0	0.9	0	7	1	7.77778	0.147326	0.636774
GATCACTCTCAATCCCG	s	Th	3	CBX5	23468	Chromobox homolog 5 (HP1 alpha homolog, Drosophila)	6	6	6	0	0	0	0.167517	0.678357
GATCTTTTCAGGGTTGG	s	T	4	CBX5	23468	Chromobox homolog 5 (HP1 alpha homolog, Drosophila)	0	0.9	0	4	4	4.44444	0.290216	0.686951
GATCAGAACCCTAGCGC	s	Th	3	CBX6	23466	Chromobox homolog 6	97	97	0	0	0	0	5.52087e-08	0.0343782
GATCCGCCACATGAAGT	s	Th	4	CBX6	23466	Chromobox homolog 6	17	17	4	0	0	0	0.0168196	0.231134
GATCTTTAGTTGTCCAC	s	T	1	CBX7	23492	Chromobox homolog 7	193	193	16	26	12	0.134715	4.01941e-09	0.0343782
GATCCCTGTGGCCAGAA	s	T	3	CBX8	57332	Chromobox homolog 8 (Pc class homolog, Drosophila)	13	13	4	13	2	1	0.873976	0.86926
GATCAGCCGGAAGAGAA	s	Th	1	CBY1	25776	Chibby homolog 1 (Drosophila)	66	66	21	0	0	0	7.73758e-06	0.0343782
GATCCTGGTGCTATGGT	s	T	1	CBY1	25776	Chibby homolog 1 (Drosophila)	0	0.9	0	4	4	4.44444	0.290216	0.686951
GATCCTGGCCCTCAGGC	s	Th	1	CC2D1A	54862	Coiled-coil and C2 domain containing 1A	106	106	4	179	9	1.68868	0.0140351	0.240852
GATCTTGGGTTTGGTCT	s	Th	3	CC2D1B	200014	Coiled-coil and C2 domain containing 1B	36	36	10	0	0	0	0.000722659	0.0929818
GATCTATGTTGCCTCTC	s	Th	1	CC2D2A	57545	Coiled-coil and C2 domain containing 2A	5	5	2	0	0	0	0.167517	0.678357
GATCCTCCTCAAGACCC	s	T	1	CC2D2B	387707	Coiled-coil and C2 domain containing 2B	5	5	5	0	0	0	0.181179	0.678357
GATCAAAAATCCAAGGA	s	Th	1	CCAR1	55749	Cell division cycle and apoptosis regulator 1	12	12	4	0	0	0	0.0509456	0.399179
GATCAGTGCAGAGAAGC	s	Th	1	CCDC100	153241	Coiled-coil domain containing 100	0	0.9	0	16	1	17.7778	0.021955	0.383968
GATCCATGCGCCCCCAC	s	T	1	CCDC101	112869	Coiled-coil domain containing 101	17	17	3	175	8	10.2941	4.44597e-10	0.0343782
GATCCGCAGTGCTCGCT	s	T	1	CCDC102A	92922	Coiled-coil domain containing 102A	8	8	5	72	4	9	0.000133863	0.0503822
GATCCGTAAGCTCCAGA	s	T	1	CCDC102B	79839	Coiled-coil domain containing 102B	0	0.9	0	37	14	41.1111	0.000824106	0.0922803
GATCAATTTCAAGAAGC	s	Th	1	CCDC104	112942	Coiled-coil domain containing 104	52	52	10	13	12	0.25	0.00640652	0.161106
GATCGCACCACGCCTCC	s	Th	1	CCDC106	29903	Coiled-coil domain containing 106	362	362	116	66	61	0.18232	1.77636e-15	0.0343782
GATCAACGCGAGCGGAC	s	Th	3	CCDC107	203260	Coiled-coil domain containing 107	48	48	22	0	0	0	9.46885e-05	0.0512997
GATCTCTCCCCACACAG	s	T	3	CCDC107	203260	Coiled-coil domain containing 107	37	37	2	0	0	0	0.00171353	0.073078
GATCACCAGAACTTTGT	s	Th	4	CCDC112	153733	Coiled-coil domain containing 112	20	20	2	0	0	0	0.00981802	0.216203
GATCCCCCACCTGGCAG	s	T	1	CCDC113	29070	Coiled-coil domain containing 113	45	45	3	0	0	0	0.000403622	0.0602665
GATCCGTGAAAGGCTGA	s	Th	2	CCDC12	151903	Coiled-coil domain containing 12	59	59	24	120	27	2.0339	0.00964647	0.217284
GATCCGTAAGTGCAGTG	s	Th	4	CCDC12	151903	Coiled-coil domain containing 12	0	0.9	0	21	7	23.3333	0.00670973	0.22588
GATCTGGACCCAAGACA	s	Th	1	CCDC120	90060	Coiled-coil domain containing 120	8	8	8	0	0	0	0.0909465	0.618326
GATCCGAGCCTCTCTGC	s	Th	5	CCDC123	84902	Coiled-coil domain containing 123	22	22	7	0	0	0	0.00981802	0.173524
GATCGAGGACACGCTGC	s	Th	1	CCDC124	115098	Coiled-coil domain containing 124	239	239	25	364	21	1.52301	0.00488593	0.175468
GATCTCAGAAAATCGGC	s	Th	4	CCDC127	133957	Coiled-coil domain containing 127	53	53	11	13	1	0.245283	0.00640652	0.161106
GATCATCAGCCGCTCCT	s	T	4	CCDC130	81576	Coiled-coil domain containing 130	8	8	2	0	0	0	0.101495	0.618326
GATCCCCATCCTGGAGA	s	T	1	CCDC130	81576	Coiled-coil domain containing 130	90	90	14	113	18	1.25556	0.340505	0.804906
GATCCTCTTCGGTTGGA	s	T	1	CCDC131	196441	Coiled-coil domain containing 131	7	7	4	46	14	6.57143	0.00219969	0.160764
GATCCGGGTTCAGCAGC	s	T	5	CCDC131	196441	Coiled-coil domain containing 131	23	23	4	0	0	0	0.0123649	0.173524
GATCGCTTTGGGCCAAA	s	Th	4	CCDC131	196441	Coiled-coil domain containing 131	20	20	10	0	0	0	0.00981802	0.216203
GATCCAGCAGCTCCAAG	s	T	4	CCDC136	64753	Coiled-coil domain containing 136	12	12	5	0	0	0	0.0586249	0.399179
GATCCCCAGTGGCCACC	s	Th	1	CCDC136	64753	Coiled-coil domain containing 136	192	192	36	136	24	0.708333	0.0865729	0.426804
GATCCCTGCTGCCACCA	s	T	1	CCDC14	64770	Coiled-coil domain containing 14	38	38	0	126	8	3.31579	0.000284263	0.0610295
GATCTTAGTGTGGACAG	s	Th	4	CCDC14	64770	Coiled-coil domain containing 14	27	27	6	0	0	0	0.00341255	0.129606
GATCAGTGATGTTGAGG	s	T	5	CCDC144B	284047	Coiled-coil domain containing 144B	61	61	9	0	0	0	3.76817e-05	0.0388462
GATCAGATTCTGACAAG	s	Th	4	CCDC144B	284047	Coiled-coil domain containing 144B	0	0.9	0	16	18	17.7778	0.021955	0.383968
GATCACCAAGACAGAAA	s	Th	3	CCDC144B	284047	Coiled-coil domain containing 144B	11	11	2	0	0	0	0.0509456	0.433224
GATCCCCAGGTGGGGCA	s	Th	1	CCDC144B	284047	Coiled-coil domain containing 144B	5	5	5	0	0	0	0.167517	0.678357
GATCAAAGTCAGACAGC	s	Th	5	CCDC144B	284047	Coiled-coil domain containing 144B	5	5	2	0	0	0	0.167517	0.678357
GATCCAAGAATCTGAAA	s	Th	1	CCDC144B	284047	Coiled-coil domain containing 144B	6	6	3	0	0	0	0.167517	0.678357
GATCGATGAGCAGATAG	s	Th	1	CCDC16	91603	Coiled-coil domain containing 16	11	11	4	0	0	0	0.0509456	0.433224
GATCCTGAGAGCTTTGA	s	T	1	CCDC23	374969	Coiled-coil domain containing 23	83	83	10	139	28	1.6747	0.0370119	0.403732
GATCCCTGGTGTCTGGA	s	T	1	CCDC24	149473	Coiled-coil domain containing 24	27	27	4	41	8	1.51852	0.350419	0.803902
GATCGTGAAGAGAGGAA	s	T	2	CCDC25	55246	Coiled-coil domain containing 25	0	0.9	0	7	4	7.77778	0.134721	0.636774
GATCGCAAGCTGTTGAT	s	T	1	CCDC28A	25901	Coiled-coil domain containing 28A	17	17	11	0	0	0	0.0344982	0.231134
GATCCCAGCAGCAGACA	s	Th	4	CCDC28B	79140	Coiled-coil domain containing 28B	0	0.9	0	33	3	36.6667	0.00119467	0.120621
GATCAAAAGAGGTGAAG	s	Th	1	CCDC41	51134	Coiled-coil domain containing 41	6	6	3	3	4	0.5	0.592387	0.844415
GATCCTCTCTGCTTTCC	s	Th	2	CCDC43	124808	Coiled-coil domain containing 43	5	5	5	3	3	0.6	0.592387	0.844415
GATCTCAGGTGACCGGC	s	Th	3	CCDC44	51204	Coiled-coil domain containing 44	19	19	18	0	0	0	0.0168196	0.216203
GATCTCGGCTTCAGCTG	s	Th	1	CCDC45	90799	Coiled-coil domain containing 45	0	0.9	0	72	25	80	1.54173e-06	0.0343782
GATCCTGAGAAACAGCG	s	Th	1	CCDC47	57003	Coiled-coil domain containing 47	19	19	7	0	0	0	0.0168196	0.216203
GATCAAGAGAAGGCAAC	s	Th	4	CCDC47	57003	Coiled-coil domain containing 47	5	5	1	0	0	0	0.167517	0.678357
GATCCGGGAGGACCCAC	s	T	3	CCDC49	54883	Coiled-coil domain containing 49	8	8	1	22	7	2.75	0.242077	0.640819
GATCTTCTTGAGAGGCC	s	T	1	CCDC53	51019	Coiled-coil domain containing 53	56	56	8	56	20	1	0.970572	0.861744
GATCAGCACCAACAGAA	s	Th	4	CCDC55	84081	Coiled-coil domain containing 55	17	17	1	0	0	0	0.0168196	0.231134
GATCAGAAAAAAGGAAC	s	Th	3	CCDC55	84081	Coiled-coil domain containing 55	0	0.9	0	11	12	12.2222	0.0404366	0.594545
GATCAGAACCGACCCAG	s	Th	4	CCDC55	84081	Coiled-coil domain containing 55	31	31	1	39	4	1.25806	0.588743	0.835568
GATCATGTCCAACCTGC	s	T	1	CCDC56	28958	Coiled-coil domain containing 56	204	204	4	247	56	1.21078	0.281056	0.774096
GATCAGAGCTCCCATCG	s	Th	1	CCDC57	284001	Coiled-coil domain containing 57	0	0.9	0	56	14	62.2222	2.39413e-05	0.043986
GATCAGTGTAGCTTTGA	s	Th	1	CCDC59	29080	Coiled-coil domain containing 59	109	109	16	89	6	0.816514	0.409506	0.779399
GATCCAGATGAAGCAGC	s	T	4	CCDC61	729440	Coiled-coil domain containing 61	5	5	1	0	0	0	0.181179	0.678357
GATCGCAGCCCACCCCC	s	Th	4	CCDC64	92558	Coiled-coil domain containing 64	77	77	1	51	6	0.662338	0.211216	0.64705
GATCCTTGGAAAAAATC	s	T	4	CCDC66	285331	Coiled-coil domain containing 66	3	3	3	7	8	2.33333	0.49943	0.792038
GATCTTGCCCTTCTGTG	s	Th	1	CCDC77	84318	Coiled-coil domain containing 77	9	9	10	0	0	0	0.0909465	0.433224
GATCCACCAGAAGCTCC	s	T	3	CCDC78	124093	Coiled-coil domain containing 78	41	41	7	126	16	3.07317	0.000555382	0.069476
GATCAGCACAGGGAGAG	s	T	3	CCDC80	151887	Coiled-coil domain containing 80	70	70	17	78	24	1.11429	0.716281	0.86038
GATCCAGCTTCATTATG	s	T	1	CCDC81	60494	Coiled-coil domain containing 81	0	0.9	0	7	0	7.77778	0.134721	0.636774
GATCACAGCTCCAGGAC	s	Th	1	CCDC84	338657	Coiled-coil domain containing 84	164	164	10	246	14	1.5	0.0263768	0.38404
GATCAGTTGCCCCTGGC	s	Th	1	CCDC85B	11007	Coiled-coil domain containing 85B	495	495	13	285	90	0.575758	2.5426e-05	0.0388462
GATCTGAGCTCAGGACG	s	Th	1	CCDC86	79080	Coiled-coil domain containing 86	0	0.9	0	34	2	37.7778	0.000678084	0.096944
GATCTGTCCATGTGGAA	s	Th	1	CCDC88A	55704	Coiled-coil domain containing 88A	152	152	3	272	18	1.78947	0.0011951	0.121523
GATCTAATGAAGGAGAA	s	T	2	CCDC88A	55704	Coiled-coil domain containing 88A	0	0.9	0	28	29	31.1111	0.00277623	0.156764
GATCAAAACTGGTTCCC	s	Th	4	CCDC88A	55704	Coiled-coil domain containing 88A	73	73	10	28	6	0.383562	0.0134272	0.210308
GATCTCAACTGCCGAAG	s	Th	1	CCDC88A	55704	Coiled-coil domain containing 88A	0	0.9	0	16	5	17.7778	0.021955	0.383968
GATCCTCCAGGAGCTGG	s	T	4	CCDC88A	55704	Coiled-coil domain containing 88A	5	5	5	0	0	0	0.181179	0.678357
GATCTGCATTTTGCCAG	s	T	1	CCDC88A	55704	Coiled-coil domain containing 88A	0	0.9	0	6	6	6.66667	0.134721	0.686951
GATCAAGAAGACAAGAC	s	Th	3	CCDC90B	60492	Coiled-coil domain containing 90B	48	48	3	0	0	0	9.46885e-05	0.0512997
GATCACCGAGCAGCCGT	s	T	4	CCDC92	80212	Coiled-coil domain containing 92	41	41	10	0	0	0	0.000651958	0.0699457
GATCCCAACAAACTTTA	s	T	3	CCDC92	80212	Coiled-coil domain containing 92	7	7	0	0	0	0	0.181179	0.618326
GATCCCAGGGGCCCCCG	s	Th	4	CCDC93	54520	Coiled-coil domain containing 93	0	0.9	0	10	1	11.1111	0.0759457	0.594545
GATCCTGTGTGTGTGTA	s	Th	1	CCDC93	54520	Coiled-coil domain containing 93	0	0.9	0	8	1	8.88889	0.0759457	0.636774
GATCCAAGTATCCTACA	s	T	2	CCDC93	54520	Coiled-coil domain containing 93	5	5	1	0	0	0	0.181179	0.678357
GATCACCTTCAAGACAG	s	T	1	CCDC94	55702	Coiled-coil domain containing 94	5	5	5	0	0	0	0.181179	0.678357
GATCGACATCCCGGAGT	s	Th	1	CCDC95	283899	Coiled-coil domain containing 95	47	47	1	80	5	1.70213	0.0826446	0.625385
GATCAGTCCCCAAATCA	s	Th	1	CCDC97	90324	Coiled-coil domain containing 97	17	17	18	3	4	0.176471	0.0678473	0.416223
GATCCTGCGAGAGGAGT	s	T	4	CCDC97	90324	Coiled-coil domain containing 97	0	0.9	0	7	4	7.77778	0.134721	0.636774
GATCCTGGAGAAGTGGG	s	T	1	CCHCR1	54535	Coiled-coil alpha-helical rod protein 1	27	27	6	45	6	1.66667	0.251532	0.746581
GATCCCGCGGGCTCCGG	s	Th	1	CCK	885	Cholecystokinin	1498	1498	18	323	19	0.215621	0	0.0343782
GATCGTTGTGCTTTTTT	s	T	1	CCKBR	887	Cholecystokinin B receptor	27	27	12	0	0	0	0.00748908	0.129606
GATCTGTGCTGACCCCA	s	Th	1	CCL2	6347	Chemokine (C-C motif) ligand 2	72	72	9	162	19	2.25	0.000754181	0.122146
GATCTACTGGGGCTGTT	s	T	1	CCL27	10850	Chemokine (C-C motif) ligand 27	23	23	4	11	11	0.478261	0.2759	0.676016
GATCGGCCTGGGGAAAT	s	Th	1	CCL3	6348	Chemokine (C-C motif) ligand 3	0	0.9	0	89	96	98.8889	1.01597e-07	0.0343782
GATCCCAGTGAGACCTG	s	Th	1	CCL4	6351	Chemokine (C-C motif) ligand 4	0	0.9	0	64	0	71.1111	4.60262e-06	0.0388462
GATCTCGGACATCAGCA	s	Th	2	CCM2	83605	Cerebral cavernous malformation 2	152	152	9	157	9	1.03289	0.890181	0.883892
GATCAGCACTCTACCAC	s	T	1	CCNB1	891	Cyclin B1	0	0.9	0	76	15	84.4444	1.25613e-06	0.0343782
GATCATACCACTGCAGT	s	T	4	CCNB1IP1	57820	Cyclin B1 interacting protein 1	0	0.9	0	7	7	7.77778	0.134721	0.636774
GATCTTGCCATGGAAGA	s	Th	1	CCNC	892	Cyclin C	19	19	2	61	4	3.21053	0.00647955	0.22799
GATCGAAGCCCTGCTGG	s	Th	1	CCND1	595	Cyclin D1	2	2	2	190	12	95	2.75335e-14	0.0343782
GATCTCTCTCTCTCTCC	s	Th	5	CCND2	894	Cyclin D2	45	45	16	0	0	0	0.000156916	0.0602665
GATCCAAGTCGGAGGAT	s	T	3	CCND2	894	Cyclin D2	22	22	4	0	0	0	0.0123649	0.173524
GATCAGTGTATGCGAAA	s	Th	1	CCND2	894	Cyclin D2	77	77	2	153	6	1.98701	0.0051087	0.17594
GATCTTTGTGGCCAAGG	s	T	1	CCND3	896	Cyclin D3	66	66	14	69	34	1.04545	0.849445	0.873698
GATCAGGTGGCACAGCT	s	T	2	CCNDBP1	23582	Cyclin D-type binding-protein 1	5	5	5	0	0	0	0.181179	0.678357
GATCTGAAGAAGTTGCT	s	Th	1	CCNH	902	Cyclin H	0	0.9	0	7	4	7.77778	0.147326	0.636774
GATCTGAAGAAGCTGCT	s	Th	1	CCNH	902	Cyclin H	5	5	5	16	2	3.2	0.23068	0.688636
GATCCTGAGCTCCCTTT	s	T	1	CCNI	10983	Cyclin I	440	440	21	293	12	0.665909	0.00374836	0.0967745
GATCTTCACACAGCCAC	s	T	4	CCNI	10983	Cyclin I	10	10	10	0	0	0	0.101495	0.433224
GATCAACTGGGAGCTAT	s	T	4	CCNI	10983	Cyclin I	10	10	4	0	0	0	0.101495	0.433224
GATCCATTGTCGGGAGC	s	Th	1	CCNI	10983	Cyclin I	648	648	77	692	72	1.0679	0.51902	0.856909
GATCGGAAGGTGGTGAA	s	Th	1	CCNJL	79616	Cyclin J-like	0	0.9	0	25	10	27.7778	0.00375444	0.169253
GATCTCGCTCCTTTGAG	s	Th	1	CCNL1	57018	Cyclin L1	123	123	13	56	60	0.455285	0.00418654	0.130496
GATCAAGAAGCAGGTCC	s	Th	2	CCNL1	57018	Cyclin L1	45	45	9	10	1	0.222222	0.00640931	0.172371
GATCAGCGACGAGAGCG	s	Th	1	CCNL2	81669	Cyclin L2	131	131	20	284	14	2.16794	2.23685e-05	0.0444611
GATCCGCCGGCGGAAGA	s	Th	4	CCNL2	81669	Cyclin L2	14	14	2	0	0	0	0.0290848	0.372717
GATCAGCGTCTCCTAAG	s	Th	4	CCNL2	81669	Cyclin L2	2	2	2	7	7	3.5	0.535479	0.792038
GATCTGTGTTGAAAGTC	s	Th	1	CCNL2	81669	Cyclin L2	8	8	8	13	14	1.625	0.658162	0.837221
GATCTACCTGCGGGGCA	s	Th	1	CCNL2	81669	Cyclin L2	6	6	6	8	2	1.33333	0.615841	0.85689
GATCCCAGCTCGCTCTC	s	Th	1	CCNY	219771	Cyclin Y	69	69	20	0	0	0	4.70449e-06	0.0343782
GATCCGCGAGGAAGCGC	s	T	1	CCNY	219771	Cyclin Y	15	15	9	0	0	0	0.0344982	0.372717
GATCACATGGGTGCTTG	s	Th	3	CCNY	219771	Cyclin Y	19	19	7	13	4	0.684211	0.578411	0.804193
GATCCTCAATACTGATT	s	T	1	CCPG1	9236	Cell cycle progression 1	18	18	19	0	0	0	0.0205587	0.231134
GATCACTTTCCCAGGTG	s	Th	1	CCR1	1230	Chemokine (C-C motif) receptor 1	0	0.9	0	71	13	78.8889	1.54173e-06	0.0343782
GATCGTCTCTCCCTCCC	s	T	1	CCR5	1234	Chemokine (C-C motif) receptor 5	0	0.9	0	43	16	47.7778	0.000248529	0.0696973
GATCCAGCAGGAGACCC	s	T	1	CCRK	23552	Cell cycle related kinase	23	23	14	0	0	0	0.0123649	0.173524
GATCCGCCTCCCGGGTT	s	Th	4	CCRN4L	25819	CCR4 carbon catabolite repression 4-like (S. cerevisiae)	20	20	1	0	0	0	0.00981802	0.216203
GATCTGCTCTTGCGATG	s	T	2	CCS	9973	Copper chaperone for superoxide dismutase	141	141	24	67	2	0.475177	0.00563811	0.131003
GATCTTTGGACCAGTTT	s	T	1	CCT2	10576	Chaperonin containing TCP1, subunit 2 (beta)	60	60	6	43	1	0.716667	0.429504	0.751933
GATCCAGAACTGTGGGG	s	T	3	CCT3	7203	Chaperonin containing TCP1, subunit 3 (gamma)	27	27	2	0	0	0	0.00748908	0.129606
GATCAGGTTGGGGGGCA	s	Th	1	CCT3	7203	Chaperonin containing TCP1, subunit 3 (gamma)	202	202	34	197	213	0.975248	0.860814	0.859706
GATCCAAGTGGCACCTC	s	T	1	CCT4	10575	Chaperonin containing TCP1, subunit 4 (delta)	0	0.9	0	13	2	14.4444	0.034404	0.404659
GATCACCTTGGTGTTCC	s	Th	1	CCT4	10575	Chaperonin containing TCP1, subunit 4 (delta)	105	105	14	93	15	0.885714	0.66209	0.835477
GATCCACTTCTGTGATT	s	T	1	CCT5	22948	Chaperonin containing TCP1, subunit 5 (epsilon)	61	61	24	0	0	0	3.76817e-05	0.0388462
GATCCTGAGGATTACAG	s	T	1	CCT6A	908	Chaperonin containing TCP1, subunit 6A (zeta 1)	22	22	9	113	25	5.13636	2.18492e-05	0.0406889
GATCAGTTGGACTTTGA	s	Th	1	CCT6A	908	Chaperonin containing TCP1, subunit 6A (zeta 1)	8	8	1	33	1	4.125	0.0423796	0.381366
GATCCAGCGCCTCGCCC	s	Th	1	CCT7	10574	Chaperonin containing TCP1, subunit 7 (eta)	34	34	5	138	11	4.05882	9.14025e-06	0.0388462
GATCGTCAGGAGGGCCA	s	T	1	CCT7	10574	Chaperonin containing TCP1, subunit 7 (eta)	40	40	25	0	0	0	0.00105553	0.0699457
GATCGTGTCTGTAGATG	s	T	1	CCT7	10574	Chaperonin containing TCP1, subunit 7 (eta)	75	75	15	17	9	0.226667	0.00186867	0.0817479
GATCATCATGGCAAAAC	s	Th	1	CCT8	10694	Chaperonin containing TCP1, subunit 8 (theta)	55	55	3	0	0	0	3.46402e-05	0.0406889
GATCCATGCCGGCGGTC	s	Th	3	CD14	929	CD14 molecule	0	0.9	0	34	8	37.7778	0.000678084	0.096944
GATCTTCACGTGCTGCC	s	T	1	CD151	977	CD151 molecule (Raph blood group)	43	43	2	121	18	2.81395	0.000856368	0.0941994
GATCCGCTCACAGGAGG	s	T	4	CD151	977	CD151 molecule (Raph blood group)	0	0.9	0	4	4	4.44444	0.290216	0.686951
GATCTGGCTGTCTTCCT	s	Th	1	CD160	11126	CD160 molecule	5	5	5	7	6	1.4	0.961189	0.85689
GATCTGGCATGGAGGTT	s	T	4	CD163	9332	CD163 molecule	0	0.9	0	50	4	55.5556	7.58015e-05	0.0512997
GATCAGGTTACTGTAGA	s	Th	1	CD164	8763	CD164 molecule, sialomucin	23	23	1	0	0	0	0.00577204	0.173524
GATCCCACGACTTTTTA	s	Th	1	CD200	4345	CD200 molecule	53	53	11	20	2	0.377358	0.0294289	0.372528
GATCTGCCAGGTGCTGC	s	Th	3	CD200	4345	CD200 molecule	0	0.9	0	10	6	11.1111	0.0759457	0.594545
GATCTGACATCCCCACT	s	T	1	CD22	933	CD22 molecule	76	76	6	0	0	0	5.77894e-06	0.0343782
GATCTGAGAGGAGGCTG	s	Th	1	CD22	933	CD22 molecule	769	769	71	172	35	0.223667	0	0.0343782
GATCTCAACCAAATATC	s	Th	1	CD248	57124	CD248 molecule, endosialin	0	0.9	0	13	12	14.4444	0.0404366	0.404659
GATCATGTTCAGCCCTG	s	T	1	CD276	80381	CD276 molecule	7	7	0	11	3	1.57143	0.566434	0.859563
GATCCGGGAGCGGCCAC	s	T	1	CD2BP2	10421	CD2 (cytoplasmic tail) binding protein 2	91	91	9	50	4	0.549451	0.0718152	0.402473
GATCCGGGGAGCTAGGA	s	T	1	CD320	51293	CD320 molecule	103	103	1	269	29	2.61165	2.64041e-06	0.0343782
GATCCTGGGAGGTTGCC	s	T	4	CD320	51293	CD320 molecule	15	15	6	4	4	0.266667	0.13408	0.673901
GATCCACATCCTCTACA	s	T	1	CD33	945	CD33 molecule	0	0.9	0	32	9	35.5556	0.00150902	0.120621
GATCTTGCCCCAGCTCA	s	T	1	CD37	951	CD37 molecule	8	8	8	46	48	5.75	0.00636678	0.160764
GATCCACCAAGAAGAGG	s	T	1	CD3EAP	10849	CD3e molecule, epsilon associated protein	10	10	6	0	0	0	0.101495	0.433224
GATCCCCTCTCTTCCTA	s	T	1	CD4	920	CD4 molecule	48	48	4	65	0	1.35417	0.397991	0.793335
GATCCAGCAGTTTGGTG	s	Th	1	CD40	958	CD40 molecule, TNF receptor superfamily member 5	0	0.9	0	46	0	51.1111	0.000126201	0.0620318
GATCCGACCCTGTGTTT	s	T	5	CD40	958	CD40 molecule, TNF receptor superfamily member 5	17	17	4	0	0	0	0.0344982	0.231134
GATCAACAGTGGCAATG	s	T	2	CD44	960	CD44 molecule (Indian blood group)	0	0.9	0	4	4	4.44444	0.290216	0.686951
GATCTATGTTGTTTGCC	s	T	1	CD47	961	CD47 molecule	7	7	0	71	17	10.1429	7.11295e-05	0.0512997
GATCCTCTCTTGGAGCT	s	T	1	CD47	961	CD47 molecule	186	186	9	136	14	0.731183	0.151962	0.600779
GATCCCAGTTTCTGCTG	s	T	5	CD47	961	CD47 molecule	2	2	2	13	2	6.5	0.141793	0.651863
GATCATGCTCCTCACCA	s	T	1	CD48	962	CD48 molecule	0	0.9	0	11	11	12.2222	0.0669655	0.594545
GATCCTTAATGCAGAGC	s	Th	1	CD59	966	CD59 molecule, complement regulatory protein	5	5	5	0	0	0	0.167517	0.678357
GATCAACGAAGAGGGAC	s	T	3	CD59	966	CD59 molecule, complement regulatory protein	0	0.9	0	4	4	4.44444	0.290216	0.686951
GATCCCGTGTTGCCATG	s	Th	2	CD59	966	CD59 molecule, complement regulatory protein	2	2	2	11	6	5.5	0.16258	0.734393
GATCCCTGAAGTTGCCC	s	T	1	CD59	966	CD59 molecule, complement regulatory protein	46	46	18	30	12	0.652174	0.308578	0.752869
GATCCATAAGGAGGGCT	s	Th	1	CD63	967	CD63 molecule	434	434	9	1087	79	2.50461	0	0.0343782
GATCACGTTTGCCATCT	s	Th	1	CD63	967	CD63 molecule	0	0.9	0	8	8	8.88889	0.0759457	0.636774
GATCCCCGTTCCTGACA	s	T	1	CD74	972	CD74 molecule, major histocompatibility complex, class II invariant chain	1109	1109	76	2020	276	1.82146	0	0.0343782
GATCCTGAGCATGGTGC	s	T	1	CD81	975	CD81 molecule	856	856	29	1550	311	1.81075	2.44249e-14	0.0343782
GATCATGAGCATGGTGC	s	Th	1	CD81	975	CD81 molecule	0	0.9	0	25	27	27.7778	0.00375444	0.169253
GATCTGAGCATGGTGCT	s	T	2	CD81	975	CD81 molecule	0	0.9	0	7	8	7.77778	0.134721	0.636774
GATCCTCATTGCCCAGG	s	T	2	CD82	3732	CD82 molecule	0	0.9	0	4	4	4.44444	0.290216	0.686951
GATCACTAAGGGATGGG	s	Th	1	CD86	942	CD86 molecule	0	0.9	0	15	3	16.6667	0.021955	0.383968
GATCTTGTGCTGTGCTA	s	Th	1	CD9	928	CD9 molecule	261	261	8	110	7	0.421456	1.42366e-05	0.0343782
GATCCCTGCAAAGGCTT	s	Th	5	CD93	22918	CD93 molecule	31	31	10	0	0	0	0.0020268	0.121827
GATCGAGCTTCTCCTCT	s	Th	1	CD93	22918	CD93 molecule	0	0.9	0	11	6	12.2222	0.0404366	0.594545
GATCCCGTGTGCCACCA	s	T	1	CD97	976	CD97 molecule	8	8	9	37	7	4.625	0.031816	0.22717
GATCCGAAGGTCTGCAC	s	T	4	CD97	976	CD97 molecule	0	0.9	0	4	0	4.44444	0.290216	0.686951
GATCCCCGGGATTGTGG	s	T	1	CD99	4267	CD99 molecule	183	183	33	1272	177	6.95082	0	0.0343782
GATCTGGCATGGTGGCA	s	T	4	CD99L2	83692	CD99 molecule-like 2	0	0.9	0	15	3	16.6667	0.034404	0.383968
GATCAAGGACTCAAAAG	s	Th	3	CD99L2	83692	CD99 molecule-like 2	8	8	1	0	0	0	0.0909465	0.618326
GATCTGCGGTGGTCAGG	s	T	1	CDADC1	81602	Cytidine and dCMP deaminase domain containing 1	17	17	16	0	0	0	0.0344982	0.231134
GATCTCACTGTTGCCTT	s	Th	4	CDC14B	8555	CDC14 cell division cycle 14 homolog B (S. cerevisiae)	11	11	11	0	0	0	0.0509456	0.433224
GATCGCACACCTTTGCA	s	Th	1	CDC16	8881	Cell division cycle 16 homolog (S. cerevisiae)	172	172	15	115	1	0.668605	0.0603642	0.404504
GATCCAGCCAAACGAAT	s	Th	1	CDC2	983	Cell division cycle 2, G1 to S and G2 to M	0	0.9	0	18	3	20	0.0120792	0.238835
GATCATTCTGAGCTCAG	s	Th	1	CDC23	8697	Cell division cycle 23 homolog (S. cerevisiae)	14	14	7	131	0	9.35714	7.36451e-08	0.0343782
GATCGAGAACCTCCTGG	s	Th	1	CDC25B	994	Cell division cycle 25 homolog B (S. pombe)	44	44	2	48	5	1.09091	0.751409	0.862266
GATCACAATAAGGAACT	s	Th	3	CDC2L2	728642	Cell division cycle 2-like 2 (PITSLRE proteins)	8	8	8	46	13	5.75	0.00562234	0.160764
GATCCTCTTCTTTCTCT	s	T	4	CDC2L5	8621	Cell division cycle 2-like 5 (cholinesterase-related cell division controller)	13	13	11	0	0	0	0.0586249	0.399179
GATCCAGAAGTCGTCAT	s	Th	3	CDC2L5	8621	Cell division cycle 2-like 5 (cholinesterase-related cell division controller)	8	8	2	0	0	0	0.0909465	0.618326
GATCTTTCAAAGAGTCC	s	Th	1	CDC2L5	8621	Cell division cycle 2-like 5 (cholinesterase-related cell division controller)	0	0.9	0	8	9	8.88889	0.0759457	0.636774
GATCTTCTGAACTATGC	s	Th	1	CDC2L5	8621	Cell division cycle 2-like 5 (cholinesterase-related cell division controller)	5	5	5	0	0	0	0.167517	0.678357
GATCAGCCACAATGACA	s	Th	1	CDC2L6	23097	Cell division cycle 2-like 6 (CDK8-like)	14	14	2	2	2	0.142857	0.115514	0.60077
GATCGGGAGTACACAGA	s	Th	1	CDC34	997	Cell division cycle 34 homolog (S. cerevisiae)	47	47	8	56	2	1.19149	0.62321	0.858361
GATCGCCAGTACATGGA	s	T	2	CDC37	11140	Cell division cycle 37 homolog (S. cerevisiae)	20	20	3	7	4	0.35	0.208452	0.657827
GATCAGACACTTAGTAC	s	Th	1	CDC37L1	55664	Cell division cycle 37 homolog (S. cerevisiae)-like 1	16	16	1	0	0	0	0.0290848	0.372717
GATCCTCTGCTACCAAA	s	T	1	CDC42BPA	8476	CDC42 binding protein kinase alpha (DMPK-like)	30	30	2	0	0	0	0.00456115	0.121827
GATCCACGCCCCCAGCC	s	T	3	CDC42BPA	8476	CDC42 binding protein kinase alpha (DMPK-like)	8	8	5	0	0	0	0.101495	0.618326
GATCAATGAGCGGCTAA	s	Th	3	CDC42BPA	8476	CDC42 binding protein kinase alpha (DMPK-like)	47	47	5	49	10	1.04255	0.893981	0.862748
GATCAGTTTTATGCCGC	s	T	2	CDC42BPB	9578	CDC42 binding protein kinase beta (DMPK-like)	8	8	2	0	0	0	0.101495	0.618326
GATCCAGAGAACGAAAG	s	T	4	CDC42BPB	9578	CDC42 binding protein kinase beta (DMPK-like)	5	5	2	0	0	0	0.181179	0.678357
GATCACGTAGACCCACC	s	Th	1	CDC42BPB	9578	CDC42 binding protein kinase beta (DMPK-like)	320	320	28	353	6	1.10312	0.485266	0.847508
GATCAGCCACCCACTCG	s	Th	1	CDC42EP1	11135	CDC42 effector protein (Rho GTPase binding) 1	125	125	20	118	6	0.944	0.805008	0.855416
GATCCCACCTGTATGGT	s	Th	1	CDC42EP2	10435	CDC42 effector protein (Rho GTPase binding) 2	41	41	2	13	14	0.317073	0.037235	0.373521
GATCCTCAGCGGCGGCC	s	T	4	CDC42EP3	10602	CDC42 effector protein (Rho GTPase binding) 3	45	45	10	2	2	0.0444444	0.00166262	0.0719491
GATCAGCGCCCCGCTGG	s	T	2	CDC42EP4	23580	CDC42 effector protein (Rho GTPase binding) 4	7	7	4	0	0	0	0.181179	0.618326
GATCCCGAGGCCTCTCC	s	T	4	CDC42EP4	23580	CDC42 effector protein (Rho GTPase binding) 4	2	2	2	9	10	4.5	0.265396	0.734393
GATCTGCCTGTCGTGCC	s	Th	1	CDC42EP4	23580	CDC42 effector protein (Rho GTPase binding) 4	100	100	0	80	2	0.8	0.457004	0.776648
GATCAAGTGACTACTGG	s	T	1	CDC42SE1	56882	CDC42 small effector 1	51	51	6	22	23	0.431373	0.0611554	0.423993
GATCACTGCTAACAATC	s	Th	5	CDC42SE2	56990	CDC42 small effector 2	2	2	2	28	1	14	0.00911982	0.218674
GATCAGGCAGTTGAAAA	s	Th	3	CDC6	990	Cell division cycle 6 homolog (S. cerevisiae)	5	5	5	0	0	0	0.167517	0.678357
GATCCAGAAAAATGCAA	s	T	2	CDC6	990	Cell division cycle 6 homolog (S. cerevisiae)	0	0.9	0	4	4	4.44444	0.290216	0.686951
GATCTGTAGTGTCATGG	s	T	1	CDCA4	55038	Cell division cycle associated 4	0	0.9	0	4	4	4.44444	0.290216	0.686951
GATCCTGCGGCTCCCCA	s	T	4	CDCA8	55143	Cell division cycle associated 8	0	0.9	0	6	6	6.66667	0.134721	0.686951
GATCTTTCACCTGCTGT	s	Th	1	CDCA8	55143	Cell division cycle associated 8	19	19	2	13	12	0.684211	0.578411	0.804193
GATCCTCCTGCCTCAAT	s	T	4	CDH1	999	Cadherin 1, type 1, E-cadherin (epithelial)	5	5	5	0	0	0	0.181179	0.678357
GATCGCCATCCTCGCCT	s	T	1	CDH11	1009	Cadherin 11, type 2, OB-cadherin (osteoblast)	45	45	13	33	7	0.733333	0.438168	0.791901
GATCATGGTAGAGAATC	s	T	1	CDH13	1012	Cadherin 13, H-cadherin (heart)	45	45	3	0	0	0	0.000403622	0.0602665
GATCCATACTGTTTGGA	s	Th	1	CDH2	1000	Cadherin 2, type 1, N-cadherin (neuronal)	0	0.9	0	8	1	8.88889	0.0759457	0.636774
GATCCTCACCCTCAGGC	s	T	1	CDH22	64405	Cadherin-like 22	28	28	27	4	4	0.142857	0.0184487	0.295882
GATCTTCGATATCGATG	s	T	5	CDH22	64405	Cadherin-like 22	15	15	9	0	0	0	0.0344982	0.372717
GATCAATGGGAAAACAA	s	Th	3	CDH3	1001	Cadherin 3, type 1, P-cadherin (placental)	0	0.9	0	26	28	28.8889	0.00375444	0.169253
GATCCATACTGCAGAGA	s	Th	5	CDH3	1001	Cadherin 3, type 1, P-cadherin (placental)	5	5	2	0	0	0	0.167517	0.678357
GATCCAGCCACCACTCT	s	T	1	CDH3	1001	Cadherin 3, type 1, P-cadherin (placental)	50	50	12	32	32	0.64	0.341112	0.734752
GATCAGGCCCATGGTGC	s	Th	3	CDH4	1002	Cadherin 4, type 1, R-cadherin (retinal)	112	112	15	84	11	0.75	0.280654	0.670613
GATCTGCAAAGTCTCAG	s	Th	3	CDH8	1006	Cadherin 8, type 2	20	20	9	0	0	0	0.00981802	0.216203
GATCCCACGGCCCCGCC	s	T	4	CDH8	1006	Cadherin 8, type 2	18	18	9	0	0	0	0.0205587	0.231134
GATCCTTTCAGCCGGCC	s	T	2	CDH9	1007	Cadherin 9, type 2 (T1-cadherin)	28	28	9	0	0	0	0.00456115	0.129606
GATCCTGAGGACCCGGG	s	T	1	CDIPT	10423	CDP-diacylglycerol--inositol 3-phosphatidyltransferase (phosphatidylinositol synthase)	161	161	5	303	54	1.88199	0.000415663	0.0726439
GATCACTTTTGAGATTG	s	Th	5	CDK10	8558	Cyclin-dependent kinase 10	0	0.9	0	8	9	8.88889	0.0759457	0.636774
GATCCCATTTTCCTCTG	s	Th	1	CDK2	1017	Cyclin-dependent kinase 2	0	0.9	0	11	3	12.2222	0.0404366	0.594545
GATCCTAGCTGCCTTGT	s	Th	2	CDK2AP1	8099	CDK2-associated protein 1	8	8	5	30	9	3.75	0.0692377	0.398772
GATCCGGCCTACCTATG	s	T	1	CDK2AP2	10263	CDK2-associated protein 2	124	124	7	154	21	1.24194	0.342341	0.781638
GATCCCAGGAGAGCTGG	s	T	1	CDK3	1018	Cyclin-dependent kinase 3	12	12	5	80	7	6.66667	0.000132602	0.0521146
GATCTGAAGCCAGAGAA	s	Th	2	CDK4	1019	Cyclin-dependent kinase 4	0	0.9	0	102	110	113.333	1.16666e-08	0.0343782
GATCTGAAGCCAGAGGA	s	Th	4	CDK4	1019	Cyclin-dependent kinase 4	19	19	9	0	0	0	0.0168196	0.216203
GATCAAGGTAACCCTGG	s	Th	4	CDK4	1019	Cyclin-dependent kinase 4	0	0.9	0	5	5	5.55556	0.147326	0.686951
GATCTGCTGCAGAACCT	s	T	2	CDK5	1020	Cyclin-dependent kinase 5	38	38	3	0	0	0	0.00105553	0.073078
GATCGACTGAGGTGCCA	s	Th	3	CDK5R2	8941	Cyclin-dependent kinase 5, regulatory subunit 2 (p39)	122	122	8	7	6	0.057377	1.86519e-08	0.0343782
GATCACCTCAGCCAGTT	s	Th	1	CDK5RAP1	51654	CDK5 regulatory subunit associated protein 1	45	45	3	0	0	0	0.000156916	0.0602665
GATCAATTGGTCGTAAC	s	Th	1	CDK5RAP2	55755	CDK5 regulatory subunit associated protein 2	28	28	2	0	0	0	0.00341255	0.129606
GATCTTGGCACTCTCCA	s	T	1	CDK5RAP3	80279	CDK5 regulatory subunit associated protein 3	40	40	5	115	8	2.875	0.00107609	0.0965841
GATCCAACACAAGCAGT	s	T	1	CDK6	1021	Cyclin-dependent kinase 6	0	0.9	0	4	4	4.44444	0.290216	0.686951
GATCGATTTGTTTTCTA	s	Th	1	CDKL2	8999	Cyclin-dependent kinase-like 2 (CDC2-related kinase)	6	6	6	0	0	0	0.167517	0.678357
GATCTTTCTAGGAGGGA	s	T	1	CDKN1A	1026	Cyclin-dependent kinase inhibitor 1A (p21, Cip1)	0	0.9	0	72	74	80	2.24757e-06	0.0343782
GATCAGCGCCTGAGAAG	s	T	1	CDKN1C	1028	Cyclin-dependent kinase inhibitor 1C (p57, Kip2)	169	169	13	17	16	0.100592	9.64798e-09	0.0343782
GATCATCAGTCACCGAA	s	T	1	CDKN2A	1029	Cyclin-dependent kinase inhibitor 2A (melanoma, p16, inhibits CDK4)	0	0.9	0	76	4	84.4444	1.25613e-06	0.0343782
GATCCCCAGACCACAAC	s	T	1	CDO1	1036	Cysteine dioxygenase, type I	55	55	1	33	16	0.6	0.198623	0.651818
GATCCCAGTGGGAACCT	s	T	1	CDR2L	30850	Cerebellar degeneration-related protein 2-like	56	56	6	39	1	0.696429	0.401489	0.777235
GATCGACAAAGGGATGC	s	Th	1	CDS2	8760	CDP-diacylglycerol synthase (phosphatidate cytidylyltransferase) 2	66	66	9	13	9	0.19697	0.00104033	0.091959
GATCCGAGCCAAGGAGG	s	T	1	CDT1	81620	Chromatin licensing and DNA replication factor 1	0	0.9	0	111	9	123.333	6.93007e-09	0.0343782
GATCCTCGTGCCTAAAA	s	T	3	CDYL	9425	Chromodomain protein, Y-like	0	0.9	0	37	1	41.1111	0.000824106	0.0922803
GATCCATTCTCACAGCC	s	T	1	CDYL	9425	Chromodomain protein, Y-like	0	0.9	0	28	3	31.1111	0.00277623	0.156764
GATCTGCCTCTCAGGAA	s	T	1	CEBPG	1054	CCAAT/enhancer binding protein (C/EBP), gamma	20	20	4	33	34	1.65	0.320704	0.779439
GATCCGGACGAGGAGGA	s	T	3	CEBPZ	10153	CCAAT/enhancer binding protein zeta	13	13	4	4	4	0.307692	0.223086	0.753392
GATCCATTCCGGCGCCT	s	T	1	CECR1	51816	Cat eye syndrome chromosome region, candidate 1	18	18	2	78	17	4.33333	0.00145898	0.0926727
GATCCTGGGCTCAGAAT	s	Th	1	CECR6	27439	Cat eye syndrome chromosome region, candidate 6	59	59	4	33	4	0.559322	0.123374	0.618946
GATCACCAAGAAGATGG	s	Th	1	CEL	1056	Carboxyl ester lipase (bile salt-stimulated lipase)	3	3	3	8	9	2.66667	0.294196	0.792038
GATCTCCACTCTTCATG	s	T	2	CELSR2	1952	Cadherin, EGF LAG seven-pass G-type receptor 2 (flamingo homolog, Drosophila)	22	22	21	0	0	0	0.0123649	0.173524
GATCCAGAAGACCTTGA	s	T	1	CELSR3	1951	Cadherin, EGF LAG seven-pass G-type receptor 3 (flamingo homolog, Drosophila)	20	20	4	11	7	0.55	0.404649	0.749707
GATCAACCCCTTGTGCC	s	Th	4	CEMP1	752014	Cementum protein 1	3	3	3	39	10	13	0.00169243	0.119474
GATCCTGACCTCCTGAG	s	Th	3	CEMP1	752014	Cementum protein 1	19	19	9	30	6	1.57895	0.384809	0.81151
GATCCTGGGCCCCCAGG	s	T	1	CEND1	51286	Cell cycle exit and neuronal differentiation 1	98	98	6	74	73	0.755102	0.307749	0.730431
GATCCTTTAGTAATGCT	s	Th	1	CENPB	1059	Centromere protein B, 80kDa	12	12	0	0	0	0	0.0509456	0.399179
[truncated: 11,609 more rows]
