# Supplementary material for: Massively Parallel Signature Sequencing and Bioinformatics Analysis Identifies Up-Regulation of TGFBI and SOX4 in Human Glioblastoma
Source: PLoS One. 2010 Apr 19;5(4):e10210. doi: 10.1371/journal.pone.0010210 (PMC2856677; doi:10.1371/journal.pone.0010210)
Supplement: Table S3 — Up-regulated genes in GBM tissues compared with normal tissues. (0.46 MB XLS) [file pone.0010210.s003.xls]

## Sheet: out
Table S3: MPSS tags that were over expressed in GBM comparing with normal brain tissues (FDR<0.1)
Signature	Significant	Selected_Step	Class	Gene Symbol		UI_HuBr_norm_SELECTED_MEAN_N	UI_HuBr_norm_STDV	UI_HuBr_tumr_SELECTED_MEAN_N	UI_HuBr_tumr_STDV	Ratio GBM/Normal*	P-Val: UI_HuBr_norm | UI_HuBr_tumr**	FDR
GATCTTGGAAATGCTTG	s	Th	1	A2M	Alpha-2-macroglobulin	0	0	52	57	#DIV/0!	4.15955e-05	0.0503822
GATCCTGCAGCTCCGTG	s	T	5	AATK	Apoptosis-associated tyrosine kinase	0	0	46	4	#DIV/0!	0.000137089	0.0620318
GATCCGAGCCAACCATC	s	Th	1	ABBA-1	Actin-bundling protein with BAIAP2 homology	484	20	1265	75	2.61364	0	0.0343782
GATCAGGGTAAGGTAGC	s	Th	1	ABCB7	ATP-binding cassette, sub-family B (MDR/TAP), member 7	2	2	62	12	31	3.55173e-05	0.043986
GATCCCCAAGTGGTGAA	s	T	1	ABCC3	ATP-binding cassette, sub-family C (CFTR/MRP), member 3	3	0	58	23	19.3333	0.000106657	0.0512997
GATCCTCGTTTTCTGGG	s	T	1	ABCF2	ATP-binding cassette, sub-family F (GCN20), member 2	33	9	169	24	5.12121	1.62507e-07	0.0343782
GATCAGTTGAGCCCGGG	s	Th	4	ABHD3	Abhydrolase domain containing 3	0	0	51	12	#DIV/0!	4.15955e-05	0.0512997
GATCCTGCTTGGGCCCC	s	T	1	ABI1	Abl-interactor 1	86	20	240	37	2.7907	3.65982e-06	0.0343782
GATCCTTGAGAAGCGAG	s	T	3	ACAD9	Acyl-Coenzyme A dehydrogenase family, member 9	15	12	128	6	8.53333	3.30132e-07	0.0343782
GATCCGAGAGGGCATGG	s	T	1	ACADVL	Acyl-Coenzyme A dehydrogenase, very long chain	521	44	1517	138	2.91171	0	0.0343782
GATCCAGCAGCACGGAG	s	T	4	ACTB	Actin, beta	0	0	65	0	#DIV/0!	7.21998e-06	0.0343782
GATCAGCAAGCAGGAGT	s	T	1	ACTB	Actin, beta	4647	195	8644	755	1.86012	0	0.0343782
GATCGGTGGCTCCATCC	s	Th	1	ACTG1	Actin, gamma 1	2129	38	4359	183	2.04744	0	0.0343782
GATCCTCTCACCATTTT	s	T	1	ADAMTS9	ADAM metallopeptidase with thrombospondin type 1 motif, 9	0	0	63	13	#DIV/0!	1.29653e-05	0.0388462
GATCCCCGTACCACAGT	s	T	1	ADCY6	Adenylate cyclase 6	68	4	206	3	3.02941	7.22096e-06	0.0343782
GATCTGAAAAGGCGTCT	s	Th	1	ADFP	Adipose differentiation-related protein	0	0	62	8	#DIV/0!	7.965e-06	0.0388462
GATCAGCCCCCAGGGCT	s	Th	2	ADM	Adrenomedullin	0	0	138	4	#DIV/0!	3.14158e-11	0.0343782
GATCCCCGGGCCCAAAC	s	T	1	AGBL5	ATP/GTP binding protein-like 5	7	6	56	9	8	0.000701129	0.0943182
GATCCAGCTTCAGCTTC	s	T	1	AGGF1	Angiogenic factor with G patch and FHA domains 1	45	13	182	26	4.04444	1.16437e-06	0.0343782
GATCATTTGGGGTCAGG	s	Th	5	AGPAT3	1-acylglycerol-3-phosphate O-acyltransferase 3	0	0	95	6	#DIV/0!	3.4391e-08	0.0343782
GATCTGGGTGTCCTGAC	s	Th	1	AGRN	Agrin	100	3	423	23	4.23	1.77636e-15	0.0343782
GATCACTTAGTTTTTGG	s	T	1	AHCY	S-adenosylhomocysteine hydrolase	0	0	41	3	#DIV/0!	0.000451822	0.0725022
GATCCACTCCGCCATCG	s	Th	1	AK2	Adenylate kinase 2	9	3	123	24	13.6667	1.87445e-08	0.0343782
GATCTGTTTGTTCCCTG	s	Th	1	AK2	Adenylate kinase 2	11	5	102	11	9.27273	2.48912e-06	0.0343782
GATCCCCACGCCTCCCC	s	T	2	AKAP13	A kinase (PRKA) anchor protein 13	0	0	59	1	#DIV/0!	2.33168e-05	0.0406889
GATCCGCAGGAGGGTGG	s	T	1	AKAP13	A kinase (PRKA) anchor protein 13	38	3	130	16	3.42105	0.000180619	0.0512997
GATCCCAGCCAATGCCA	s	Th	1	AKR1A1	Aldo-keto reductase family 1, member A1 (aldehyde reductase)	0	0	41	8	#DIV/0!	0.000220483	0.0725022
GATCCTGCCCACTGTGT	s	T	1	AKR7A3	Aldo-keto reductase family 7, member A3 (aflatoxin aldehyde reductase)	3	0	43	3	14.3333	0.00112264	0.0961818
GATCTCTCCACGGTAGC	s	Th	1	AKT1	V-akt murine thymoma viral oncogene homolog 1	102	11	261	14	2.55882	2.84747e-06	0.0343782
GATCCATGAGCTGCCCT	s	T	1	AKT2	V-akt murine thymoma viral oncogene homolog 2	3	3	43	5	14.3333	0.00112264	0.0961818
GATCCCCTGAGCAAGTC	s	T	4	ALDH3A2	Aldehyde dehydrogenase 3 family, member A2	10	7	173	31	17.3	3.39466e-11	0.0343782
GATCCTCCCTGATGGGG	s	T	1	ALDOA	Aldolase A, fructose-bisphosphate	23	2	82	2	3.56522	0.00198915	0.0992481
GATCCTGCGGGCAAGCT	s	T	3	ALG1	Asparagine-linked glycosylation 1 homolog (S. cerevisiae, beta-1,4-mannosyltransferase)	18	8	180	24	10	4.88498e-10	0.0343782
GATCCTACCTCCAGGCG	s	Th	5	ALG12	Asparagine-linked glycosylation 12 homolog (S. cerevisiae, alpha-1,6-mannosyltransferase)	0	0	36	14	#DIV/0!	0.000678084	0.096944
GATCCGCGCGGGCCGGG	s	Th	1	AMH	Anti-Mullerian hormone	0	0	172	35	#DIV/0!	8.74856e-14	0.0343782
GATCAGCCGAAGAAAGC	s	Th	1	ANAPC5	Anaphase promoting complex subunit 5	109	27	343	8	3.14679	5.44311e-10	0.0343782
GATCCTGGGCCAGCCCC	s	T	1	ANGEL1	Angel homolog 1 (Drosophila)	0	0	35	5	#DIV/0!	0.000824106	0.096944
GATCCGACCGAACCCCA	s	Th	1	ANGPTL2	Angiopoietin-like 2	8	4	103	6	12.875	4.48537e-07	0.0343782
GATCCTGACTCAGCTGG	s	T	3	ANKIB1	Ankyrin repeat and IBR domain containing 1	86	3	262	4	3.04651	2.91859e-07	0.0343782
GATCCCTCAGCAGGAAC	s	Th	1	ANKMY2	Ankyrin repeat and MYND domain containing 2	33	7	100	3	3.0303	0.00117558	0.0995298
GATCACTGCCTTGGGCT	s	Th	1	ANKRD10	Ankyrin repeat domain 10	116	1	435	12	3.75	1.55431e-14	0.0343782
GATCATAGTCCAACATT	s	Th	1	ANKRD12	Ankyrin repeat domain 12	0	0	36	19	#DIV/0!	0.000678084	0.096944
GATCCAAATCTTGCGGA	s	Th	4	ANKRD26	Ankyrin repeat domain 26	0	0	49	1	#DIV/0!	7.2386e-05	0.0512997
GATCAGAATCATGGTCT	s	Th	1	ANXA2	Annexin A2	14	11	89	13	6.35714	5.62863e-05	0.0510659
GATCTCTTTGACTGCTG	s	Th	1	ANXA5	Annexin A5	42	12	146	13	3.47619	2.40012e-05	0.043986
GATCTTAGCCATCCCAA	s	Th	1	AP3M1	Adaptor-related protein complex 3, mu 1 subunit	3	3	44	8	14.6667	0.000556847	0.0920388
GATCAGAACTTACAAAC	s	Th	3	AP4M1	Adaptor-related protein complex 4, mu 1 subunit	0	0	38	5	#DIV/0!	0.000386126	0.0922803
GATCAGCCTGTGCCACA	s	Th	1	APEH	N-acylaminoacyl-peptide hydrolase	44	11	149	13	3.38636	1.55384e-05	0.0444611
GATCCCACCTGCCTGTC	s	Th	1	APH1A	Anterior pharynx defective 1 homolog A (C. elegans)	75	10	190	2	2.53333	7.00073e-05	0.059695
GATCCAGCCAGACTTGC	s	T	1	APOA1BP	Apolipoprotein A-I binding protein	86	3	284	47	3.30233	2.11604e-08	0.0343782
GATCGTCTTGGAAGGCC	s	T	1	APOC1	Apolipoprotein C-I	37	5	817	11	22.0811	0	0.0343782
GATCCCCCAGGTTCAGA	s	Th	1	APOC2	Apolipoprotein C-II	61	9	171	17	2.80328	6.9227e-05	0.0508427
GATCTTGGCAAGAAACC	s	Th	1	APOD	Apolipoprotein D	253	21	523	42	2.06719	4.53383e-08	0.0343782
GATCCTTGAGTCCTACT	s	T	1	APOE	Apolipoprotein E	0	0	56	2	#DIV/0!	4.2002e-05	0.043986
GATCACTGTGGACAGGG	s	Th	1	APPL2	Adaptor protein, phosphotyrosine interaction, PH domain and leucine zipper containing 2	116	32	276	28	2.37931	5.57586e-06	0.0388462
GATCCCCCATTCCCCAC	s	T	1	ARAF	V-raf murine sarcoma 3611 viral oncogene homolog	33	5	111	29	3.36364	0.00042834	0.0708454
GATCATCCAGTACGTGG	s	T	1	ARC	Activity-regulated cytoskeleton-associated protein	7	6	330	56	47.1429	0	0.0343782
GATCAGTGAAGTGGAGC	s	Th	1	ARD1A	ARD1 homolog A, N-acetyltransferase (S. cerevisiae)	103	4	225	37	2.18447	0.000138103	0.0699685
GATCCCCGCAACTCGCT	s	T	1	ARF1	ADP-ribosylation factor 1	1315	1	1795	109	1.36502	3.51788e-06	0.0388462
GATCACCGAAGCAGCCA	s	T	1	ARFGAP1	ADP-ribosylation factor GTPase activating protein 1	60	16	351	20	5.85	4.21885e-15	0.0343782
GATCTTCCACGTCTCCA	s	Th	1	ARHGDIB	Rho GDP dissociation inhibitor (GDI) beta	3	3	72	6	24	6.90253e-06	0.0343782
GATCTCCTCACAGTCGC	s	T	1	ARHGEF17	Rho guanine nucleotide exchange factor (GEF) 17	0	0	87	85	#DIV/0!	2.20516e-07	0.0343782
GATCCCAGGAATTCAGG	s	T	4	ARHGEF19	Rho guanine nucleotide exchange factor (GEF) 19	0	0	58	8	#DIV/0!	2.33168e-05	0.0406889
GATCCAGTATCTTCCTC	s	T	1	ARHGEF7	Rho guanine nucleotide exchange factor (GEF) 7	71	1	186	25	2.61972	0.000156199	0.0512997
GATCCCCACAGTTTGGT	s	T	1	ARID1A	AT rich interactive domain 1A (SWI-like)	149	27	410	67	2.75168	2.05787e-09	0.0343782
GATCCTCTCCCTTTCCC	s	T	1	ARID3B	AT rich interactive domain 3B (BRIGHT-like)	0	0	63	6	#DIV/0!	1.29653e-05	0.0388462
GATCCAAGACTGGCTGA	s	Th	1	ARIH1	Ariadne homolog, ubiquitin-conjugating enzyme E2 binding protein, 1 (Drosophila)	3	0	95	4	31.6667	1.5492e-07	0.0343782
GATCTGAGTTGCAGCTC	s	T	1	ARIH2	Ariadne homolog 2 (Drosophila)	41	10	137	4	3.34146	0.000147019	0.0512997
GATCACATTGGTCCAAC	s	Th	4	ARL4A	ADP-ribosylation factor-like 4A	0	0	48	28	#DIV/0!	7.2386e-05	0.0602665
GATCCCTTCCTCCCTCC	s	T	4	ARMC2	Armadillo repeat containing 2	0	0	50	49	#DIV/0!	7.58015e-05	0.0512997
GATCATTGGGTGAACAG	s	Th	1	ARMC6	Armadillo repeat containing 6	0	0	41	15	#DIV/0!	0.000220483	0.0725022
GATCCTCCCTCCCCTAA	s	T	1	ARPC4	Actin related protein 2/3 complex, subunit 4, 20kDa	53	8	215	42	4.0566	7.76903e-08	0.0343782
GATCCAAACAAATACAC	s	T	1	ARPC5	Actin related protein 2/3 complex, subunit 5, 16kDa	2	2	59	1	29.5	0.000106657	0.0512997
GATCTGTTCTTTGGATT	s	Th	1	ARSB	Arylsulfatase B	0	0	46	13	#DIV/0!	0.000126201	0.0620318
GATCTGGTGGGCAGTCG	s	Th	1	ASAH1	N-acylsphingosine amidohydrolase (acid ceramidase) 1	75	1	169	18	2.25333	0.000614697	0.0990453
GATCCCATCCTGAGACC	s	Th	1	ASCC2	Activating signal cointegrator 1 complex subunit 2	66	16	180	1	2.72727	3.89782e-05	0.0503822
GATCCAGTGACAGCAGG	s	T	1	ASCC3L1	Activating signal cointegrator 1 complex subunit 3-like 1	217	30	548	56	2.52535	1.23445e-10	0.0343782
GATCAAGAGGCCACCAG	s	Th	1	ASCL1	Achaete-scute complex homolog 1 (Drosophila)	62	1	256	23	4.12903	1.05178e-09	0.0343782
GATCCTAGACTCGGTGC	s	Th	2	ASF1B	ASF1 anti-silencing function 1 homolog B (S. cerevisiae)	0	0	69	11	#DIV/0!	2.66252e-06	0.0343782
GATCACTCCAGCCTGCT	s	Th	3	ASGR1	Asialoglycoprotein receptor 1	0	0	95	1	#DIV/0!	3.4391e-08	0.0343782
GATCCCGAGTTCAACGC	s	Th	3	ASRGL1	Asparaginase like 1	5	5	67	3	13.4	4.51162e-05	0.0444611
GATCTCTTTGCCCCCCT	s	T	2	ATF4	Activating transcription factor 4 (tax-responsive enhancer element B67)	0	0	58	3	#DIV/0!	2.33168e-05	0.0406889
GATCCGTACCTGGGGCC	s	Th	5	ATG16L2	ATG16 autophagy related 16-like 2 (S. cerevisiae)	0	0	61	7	#DIV/0!	7.965e-06	0.0388462
GATCAACTATTTGCCTG	s	T	1	ATG5	ATG5 autophagy related 5 homolog (S. cerevisiae)	0	0	87	0	#DIV/0!	2.20516e-07	0.0343782
GATCTGGGACATGAGCG	s	Th	2	ATG7	ATG7 autophagy related 7 homolog (S. cerevisiae)	0	0	46	4	#DIV/0!	0.000126201	0.0620318
GATCCTCCCGCTGGCTT	s	T	1	ATOX1	ATX1 antioxidant protein 1 homolog (yeast)	121	3	579	57	4.78512	0	0.0343782
GATCCTGTTCCTAAGTT	s	T	1	ATP10B	ATPase, class V, type 10B	5	5	52	21	10.4	0.00124208	0.0741054
GATCCTGGCGCTCAATG	s	T	1	ATP13A1	ATPase type 13A1	70	3	301	38	4.3	7.20122e-11	0.0343782
GATCACTTCTGAATAAG	s	Th	1	ATP5F1	ATP synthase, H+ transporting, mitochondrial F0 complex, subunit B1	27	1	128	20	4.74074	6.79683e-06	0.0388462
GATCCGTCAATCTTGGG	s	T	1	ATP5O	ATP synthase, H+ transporting, mitochondrial F1 complex, O subunit (oligomycin sensitivity conferring protein)	317	4	631	49	1.99054	4.76682e-08	0.0343782
GATCCGAGTGAGGCGAC	s	T	1	ATP6V0E1	ATPase, H+ transporting, lysosomal 9kDa, V0 subunit e1	13	11	98	12	7.53846	8.60426e-06	0.0343782
GATCATTACCCACCATA	s	Th	1	ATXN1	Ataxin 1	12	4	69	1	5.75	0.000427211	0.0926416
GATCCGCCAGGAGTTCG	s	T	3	AZI1	5-azacytidine induced 1	18	4	130	19	7.22222	9.82469e-07	0.0343782
GATCTGGCCCTCCCCAG	s	Th	1	BAALC	Brain and acute leukemia, cytoplasmic	222	20	376	12	1.69369	0.000371574	0.0934922
GATCCCCACACAGAAAC	s	T	1	BAG3	BCL2-associated athanogene 3	61	1	227	10	3.72131	1.94313e-07	0.0343782
GATCCTCTGCTCCGCCG	s	T	1	BAHCC1	BAH domain and coiled-coil containing 1	48	13	158	24	3.29167	3.96505e-05	0.0406889
GATCCTGCCCACGGCCA	s	T	5	BAI1	Brain-specific angiogenesis inhibitor 1	10	3	111	23	11.1	4.91885e-07	0.0343782
GATCCCGCTGGTGGGCC	s	Th	2	BAI1	Brain-specific angiogenesis inhibitor 1	745	37	1511	10	2.02819	0	0.0343782
GATCCCCCAGGGTCCAT	s	T	2	BAIAP2	BAI1-associated protein 2	28	27	132	16	4.71429	1.04611e-05	0.0343782
GATCCTCCCTCATGGCT	s	Th	1	BAK1	BCL2-antagonist/killer 1	0	0	34	6	#DIV/0!	0.000678084	0.096944
GATCGCTTTGAGGTCAA	s	Th	2	BAT1	HLA-B associated transcript 1	0	0	38	41	#DIV/0!	0.000386126	0.0922803
GATCATCACGGACTCCC	s	T	1	BAT2	HLA-B associated transcript 2	441	1	709	62	1.60771	2.25797e-05	0.0406889
GATCGACAGGCAGTACC	s	Th	3	BAT2D1	BAT2 domain containing 1	0	0	107	20	#DIV/0!	3.96513e-09	0.0343782
GATCCAAGACCAGGGTG	s	Th	1	BAX	BCL2-associated X protein	8	5	115	14	14.375	9.17356e-08	0.0343782
GATCTGGCCAGAGGGGT	s	T	1	BAZ1B	Bromodomain adjacent to zinc finger domain, 1B	50	18	152	37	3.04	9.63554e-05	0.0545859
GATCTTCCATCAGGGCC	s	T	1	BCAN	Brevican	362	71	7603	565	21.0028	0	0.0343782
GATCCCCCCTTCCAGCC	s	T	1	BCAN	Brevican	18	1	317	17	17.6111	0	0.0343782
GATCTTCCATCAGGGCG	s	Th	2	BCAN	Brevican	0	0	34	37	#DIV/0!	0.000678084	0.096944
GATCCTGGCGGCTGCCG	s	Th	4	BCL6	B-cell CLL/lymphoma 6 (zinc finger protein 51)	0	0	46	4	#DIV/0!	0.000126201	0.0620318
GATCCCGAGCAAAAGCC	s	Th	1	BCL7A	B-cell CLL/lymphoma 7A	9	0	121	27	13.4444	3.1827e-08	0.0343782
GATCCCGGGGGCATAAC	s	Th	1	BCL7C	B-cell CLL/lymphoma 7C	56	1	389	38	6.94643	0	0.0343782
GATCCCCCCACAGATGA	s	Th	5	BCL9	B-cell CLL/lymphoma 9	0	0	49	3	#DIV/0!	7.2386e-05	0.0512997
GATCGAGAACGGGAGCC	s	Th	1	BGN	Biglycan	28	2	107	20	3.82143	0.000112418	0.0608019
GATCGGAATGGTGGAGA	s	Th	1	BLOC1S1	Biogenesis of lysosome-related organelles complex-1, subunit 1	72	9	198	3	2.75	1.23972e-05	0.0435195
GATCCCTCTTGGTGTGA	s	Th	1	BMP7	Bone morphogenetic protein 7 (osteogenic protein 1)	62	2	166	12	2.67742	0.000102224	0.0622268
GATCGCTTGAGACCAGC	s	Th	5	BNIP2	BCL2/adenovirus E1B 19kDa interacting protein 2	0	0	100	14	#DIV/0!	1.16666e-08	0.0343782
GATCCTGCCTGCGTCCG	s	T	1	BRSK1	BR serine/threonine kinase 1	23	1	110	7	4.78261	3.65576e-05	0.0435195
GATCACTTTATTTGCTA	s	Th	2	BTG1	B-cell translocation gene 1, anti-proliferative	0	0	93	8	#DIV/0!	3.4391e-08	0.0343782
GATCCCTTTGAGAGGTG	s	T	2	BTG2	BTG family, member 2	91	15	330	60	3.62637	3.97878e-10	0.0343782
GATCTGTCCACTCCTGG	s	T	1	BTN3A2	Butyrophilin, subfamily 3, member A2	0	0	58	22	#DIV/0!	2.33168e-05	0.0406889
GATCAGCCAGAAAATGC	s	Th	1	BTRC	Beta-transducin repeat containing	2	2	59	12	29.5	6.1436e-05	0.0512997
GATCAAGGCAGGGAAAG	s	Th	3	C12orf34	Chromosome 12 open reading frame 34	3	3	120	8	40	2.08186e-09	0.0343782
GATCCACTTGCATTCCA	s	T	1	C13orf7	Chromosome 13 open reading frame 7	28	4	184	2	6.57143	7.62018e-09	0.0343782
GATCCAGGACTTGGCGC	s	T	1	C14orf133	Chromosome 14 open reading frame 133	46	5	214	64	4.65217	1.43382e-08	0.0343782
GATCTCAAGAAGCCCCA	s	Th	1	C14orf153	Chromosome 14 open reading frame 153	17	1	75	16	4.41176	0.00100607	0.0967551
GATCCAAAGACAGACCA	s	T	1	C14orf166	Chromosome 14 open reading frame 166	37	8	143	2	3.86486	1.28547e-05	0.0388462
GATCAAGACCACATCTG	s	Th	4	C16orf35	Chromosome 16 open reading frame 35	0	0	97	12	#DIV/0!	2.00256e-08	0.0343782
GATCCTCCGGGAGTAGT	s	Th	1	C16orf53	Chromosome 16 open reading frame 53	39	6	143	24	3.66667	1.77873e-05	0.0435195
GATCTGCTCTGCTGCCC	s	T	1	C16orf62	Chromosome 16 open reading frame 62	81	5	230	24	2.83951	6.91635e-06	0.0343782
GATCACCAACAGCCGTC	s	Th	2	C17orf37	Chromosome 17 open reading frame 37	6	0	198	24	33	2.37588e-14	0.0343782
GATCCTAGGGGTTTGGC	s	T	1	C17orf39	Chromosome 17 open reading frame 39	7	0	95	22	13.5714	1.30309e-06	0.0343782
GATCCACGCCAACCACG	s	T	3	C17orf70	Chromosome 17 open reading frame 70	30	2	97	2	3.23333	0.00132797	0.0970897
GATCTGCTGTTGCTGGA	s	T	1	C18orf25	Chromosome 18 open reading frame 25	12	2	76	4	6.33333	0.000228042	0.062894
GATCTGCGCTGGGGGGT	s	T	1	C19orf20	Chromosome 19 open reading frame 20	27	11	214	11	7.92593	3.60616e-11	0.0343782
GATCGTGCCACTGCCAC	s	T	4	C19orf40	Chromosome 19 open reading frame 40	0	0	171	70	#DIV/0!	7.35634e-13	0.0343782
GATCACCCCATTTCTCC	s	Th	3	C19orf47	Chromosome 19 open reading frame 47	3	3	67	10	22.3333	1.1906e-05	0.0388462
GATCCCCCTTGCTCCGC	s	T	1	C1orf144	Chromosome 1 open reading frame 144	10	6	110	3	11	4.91885e-07	0.0343782
GATCCCCCTGCCCCCCC	s	Th	4	C1orf159	Chromosome 1 open reading frame 159	0	0	51	55	#DIV/0!	4.15955e-05	0.0512997
GATCCAGATTTGCCGAT	s	T	1	C1orf19	Chromosome 1 open reading frame 19	7	7	80	0	11.4286	1.27976e-05	0.0388462
GATCCAAGAAATGGGGT	s	T	5	C1orf21	Chromosome 1 open reading frame 21	2	2	54	1	27	0.000191644	0.0600848
GATCTTCTCACCTGGGG	s	T	4	C1orf61	Chromosome 1 open reading frame 61	100	7	410	85	4.1	6.4837e-14	0.0343782
GATCAAATGGGGTGATG	s	Th	5	C1orf61	Chromosome 1 open reading frame 61	0	0	38	5	#DIV/0!	0.000386126	0.0922803
GATCCCGAAACCAATGA	s	T	3	C1orf77	Chromosome 1 open reading frame 77	32	3	128	14	4	3.97642e-05	0.0435195
GATCAGATTCAACGCGG	s	Th	1	C1QC	Complement component 1, q subcomponent, C chain	136	22	382	41	2.80882	1.32933e-09	0.0343782
GATCCTGCACCTGGACG	s	T	1	C1QL1	Complement component 1, q subcomponent-like 1	78	1	1470	408	18.8462	0	0.0343782
GATCGGGTGCTAGGACA	s	Th	1	C20orf117	Chromosome 20 open reading frame 117	102	2	340	41	3.33333	2.11812e-10	0.0343782
GATCGTGCGCCGAGGCC	s	Th	4	C20orf149	Chromosome 20 open reading frame 149	9	7	95	22	10.5556	2.18983e-06	0.0343782
GATCCCACCAGCCAGCA	s	T	1	C20orf149	Chromosome 20 open reading frame 149	1066	42	1621	117	1.52064	8.06236e-09	0.0343782
GATCATAGCTCCTAGTG	s	Th	1	C20orf177	Chromosome 20 open reading frame 177	0	0	41	2	#DIV/0!	0.000220483	0.0725022
GATCGTTGGGGAACCCC	s	Th	1	C20orf24	Chromosome 20 open reading frame 24	28	1	105	8	3.75	0.000177613	0.0624847
GATCACAGTCCCTGTGC	s	Th	1	C20orf4	Chromosome 20 open reading frame 4	12	4	69	5	5.75	0.000427211	0.0926416
GATCGGAATGCGGGGTC	s	Th	1	C20orf52	Chromosome 20 open reading frame 52	0	0	228	247	#DIV/0!	0	0.0343782
GATCCTGCCTGCCTTTG	s	Th	3	C20orf67	Chromosome 20 open reading frame 67	31	5	102	19	3.29032	0.000589326	0.0742493
GATCGAGCAGACCTCCA	s	Th	1	C21orf56	Chromosome 21 open reading frame 56	17	5	144	5	8.47059	2.89915e-08	0.0343782
GATCCGCAAGGGCTCCC	s	T	4	C21orf58	Chromosome 21 open reading frame 58	0	0	61	14	#DIV/0!	1.29653e-05	0.0388462
GATCCACGCAGGTAGGT	s	T	1	C2orf52	Chromosome 2 open reading frame 52	2	2	67	2	33.5	3.31657e-05	0.0388462
GATCTGTACCAGGTACC	s	Th	2	C3	Complement component 3	192	18	748	38	3.89583	0	0.0343782
GATCACTGCCTGAGACA	s	Th	1	C3orf17	Chromosome 3 open reading frame 17	0	0	95	12	#DIV/0!	3.4391e-08	0.0343782
GATCCCACCTGGTATCA	s	Th	1	C3orf42	Chromosome 3 open reading frame 42	0	0	66	15	#DIV/0!	4.60262e-06	0.0343782
GATCGTGGTGGTGGGGG	s	T	4	C3orf60	Chromosome 3 open reading frame 60	0	0	82	13	#DIV/0!	7.02724e-07	0.0343782
GATCCTCCCACAGTGGA	s	T	1	C4orf28	Chromosome 4 open reading frame 28	28	3	130	19	4.64286	1.72513e-05	0.0343782
GATCTTGCTGACACTGC	s	Th	5	C5orf37	Chromosome 5 open reading frame 37	0	0	41	12	#DIV/0!	0.000220483	0.0725022
GATCCGGGGCGCCTTGG	s	T	1	C5orf38	Chromosome 5 open reading frame 38	0	0	69	8	#DIV/0!	4.02592e-06	0.0343782
GATCCTGGACAGGATGC	s	T	1	C6orf100	Chromosome 6 open reading frame 100	0	0	45	18	#DIV/0!	0.000248529	0.0620318
GATCCTGGATGTCCTTC	s	T	1	C6orf113	Chromosome 6 open reading frame 113	5	5	59	17	11.8	0.000395706	0.0630416
GATCTCCCCATCTCCCC	s	T	1	C6orf134	Chromosome 6 open reading frame 134	8	9	97	13	12.125	4.65886e-06	0.0343782
GATCACAGCTGCCCTTG	s	Th	3	C6orf153	Chromosome 6 open reading frame 153	5	5	56	6	11.2	0.000387715	0.0705426
GATCCCAACGGCTTGCG	s	Th	1	C6orf48	Chromosome 6 open reading frame 48	205	15	664	39	3.23902	0	0.0343782
GATCCTGGGAGCCTCTG	s	T	1	C7orf26	Chromosome 7 open reading frame 26	46	15	228	23	4.95652	1.93331e-09	0.0343782
GATCTGCAAGGCATAGG	s	Th	1	C7orf38	Chromosome 7 open reading frame 38	5	2	66	18	13.2	7.72305e-05	0.0508427
GATCCAGTCTTAATTTG	s	T	1	C7orf41	Chromosome 7 open reading frame 41	0	0	50	51	#DIV/0!	7.58015e-05	0.0512997
GATCCCTGGAGGGCTAG	s	Th	1	C7orf47	Chromosome 7 open reading frame 47	20	2	130	8	6.5	6.30414e-07	0.0343782
GATCACGTACCTGTGCA	s	Th	1	C7orf50	Chromosome 7 open reading frame 50	80	7	277	7	3.4625	4.68442e-09	0.0343782
GATCAAGATGTGGAGGA	s	Th	1	C8orf4	Chromosome 8 open reading frame 4	8	1	72	8	9	8.75414e-05	0.0503822
GATCAGAGGAAATTCTG	s	Th	1	C9orf103	Chromosome 9 open reading frame 103	0	0	67	6	#DIV/0!	2.66252e-06	0.0343782
GATCCCCAGAGAGGTGG	s	Th	1	C9orf142	Chromosome 9 open reading frame 142	195	1	543	14	2.78462	7.12763e-13	0.0343782
GATCTGGGCTGCACACA	s	Th	4	C9orf61	Chromosome 9 open reading frame 61	0	0	97	14	#DIV/0!	2.00256e-08	0.0343782
GATCAAGGAAGGCTGCC	s	Th	1	C9orf7	Chromosome 9 open reading frame 7	0	0	144	38	#DIV/0!	1.07561e-11	0.0343782
GATCACGCTGAGCAGCA	s	Th	3	C9orf80	Chromosome 9 open reading frame 80	6	3	48	1	8	0.00113701	0.0981535
GATCCTTACCAACAAGG	s	T	1	C9orf89	Chromosome 9 open reading frame 89	8	1	97	6	12.125	4.65886e-06	0.0343782
GATCCATTTGCTGTTTC	s	T	1	CA10	Carbonic anhydrase X	0	0	48	17	#DIV/0!	0.000137089	0.0602665
GATCTGAAATGAGGCCT	s	T	1	CACNG4	Calcium channel, voltage-dependent, gamma subunit 4	18	2	334	26	18.5556	0	0.0343782
GATCTGAAGGTCACTGT	s	Th	1	CALCOCO2	Calcium binding and coiled-coil domain 2	2	2	43	16	21.5	0.00096987	0.0961818
GATCAAGTAACATGTTG	s	Th	1	CALM2	Calmodulin 2 (phosphorylase kinase, delta)	0	0	41	38	#DIV/0!	0.000220483	0.0725022
GATCCCAGCAGCCTGTT	s	Th	4	CALM3	Calmodulin 3 (phosphorylase kinase, delta)	16	15	141	29	8.8125	1.56066e-08	0.0343782
GATCCGATTTTACCTTG	s	Th	1	CAMK2N2	Calcium/calmodulin-dependent protein kinase II inhibitor 2	31	10	120	9	3.87097	4.01959e-05	0.0503822
GATCCACAGAGCTGGAG	s	T	1	CAMTA1	Calmodulin binding transcription activator 1	2	2	108	2	54	5.73146e-08	0.0343782
GATCCCCTGACCTGCAT	s	T	1	CAMTA1	Calmodulin binding transcription activator 1	65	24	330	33	5.07692	5.82423e-13	0.0343782
GATCAGCTCCATGACAA	s	Th	5	CANX	Calnexin	0	0	46	27	#DIV/0!	0.000126201	0.0620318
GATCCCTGCCCAGCACC	s	Th	1	CAP1	CAP, adenylate cyclase-associated protein 1 (yeast)	148	6	335	80	2.26351	2.49299e-06	0.0343782
GATCCACCACAGGGTTA	s	Th	1	CAPN5	Calpain 5	0	0	126	35	#DIV/0!	1.57133e-10	0.0343782
GATCCTGTCTGGAGTCA	s	T	4	CAPNS1	Calpain, small subunit 1	0	0	74	20	#DIV/0!	2.24757e-06	0.0343782
GATCTGTTTCCCATGAA	s	T	1	CASC5	Cancer susceptibility candidate 5	0	0	59	13	#DIV/0!	2.33168e-05	0.0406889
GATCCCACAAGTCCTAA	s	Th	3	CASKIN2	CASK interacting protein 2	6	3	51	4	8.5	0.000663967	0.0931773
GATCCCGGCTGCTTGGA	s	T	2	CASP6	Caspase 6, apoptosis-related cysteine peptidase	0	0	63	1	#DIV/0!	1.29653e-05	0.0388462
GATCAACCATCGCTTTA	s	Th	4	CAV1	Caveolin 1, caveolae protein, 22kDa	0	0	43	0	#DIV/0!	0.000220483	0.0696973
GATCCTGGCACGCTGAG	s	T	1	CBX2	Chromobox homolog 2 (Pc class homolog, Drosophila)	0	0	132	23	#DIV/0!	2.2185e-10	0.0343782
GATCGACGTGTAGTGAA	s	Th	3	CBX3	Chromobox homolog 3 (HP1 gamma homolog, Drosophila)	0	0	128	17	#DIV/0!	1.57133e-10	0.0343782
GATCCATGCGCCCCCAC	s	T	1	CCDC101	Coiled-coil domain containing 101	17	3	175	8	10.2941	4.44597e-10	0.0343782
GATCCGCAGTGCTCGCT	s	T	1	CCDC102A	Coiled-coil domain containing 102A	8	5	72	4	9	0.000133863	0.0503822
GATCCGTAAGCTCCAGA	s	T	1	CCDC102B	Coiled-coil domain containing 102B	0	0	37	14	#DIV/0!	0.000824106	0.0922803
GATCCCTGCTGCCACCA	s	T	1	CCDC14	Coiled-coil domain containing 14	38	0	126	8	3.31579	0.000284263	0.0610295
GATCTCGGCTTCAGCTG	s	Th	1	CCDC45	Coiled-coil domain containing 45	0	0	72	25	#DIV/0!	1.54173e-06	0.0343782
GATCAGAGCTCCCATCG	s	Th	1	CCDC57	Coiled-coil domain containing 57	0	0	56	14	#DIV/0!	2.39413e-05	0.043986
GATCCACCAGAAGCTCC	s	T	3	CCDC78	Coiled-coil domain containing 78	41	7	126	16	3.07317	0.000555382	0.069476
GATCTGAGCTCAGGACG	s	Th	1	CCDC86	Coiled-coil domain containing 86	0	0	34	2	#DIV/0!	0.000678084	0.096944
GATCGGCCTGGGGAAAT	s	Th	1	CCL3	Chemokine (C-C motif) ligand 3	0	0	89	96	#DIV/0!	1.01597e-07	0.0343782
GATCCCAGTGAGACCTG	s	Th	1	CCL4	Chemokine (C-C motif) ligand 4	0	0	64	0	#DIV/0!	4.60262e-06	0.0388462
GATCAGCACTCTACCAC	s	T	1	CCNB1	Cyclin B1	0	0	76	15	#DIV/0!	1.25613e-06	0.0343782
GATCGAAGCCCTGCTGG	s	Th	1	CCND1	Cyclin D1	2	2	190	12	95	2.75335e-14	0.0343782
GATCAGCGACGAGAGCG	s	Th	1	CCNL2	Cyclin L2	131	20	284	14	2.16794	2.23685e-05	0.0444611
GATCACTTTCCCAGGTG	s	Th	1	CCR1	Chemokine (C-C motif) receptor 1	0	0	71	13	#DIV/0!	1.54173e-06	0.0343782
GATCGTCTCTCCCTCCC	s	T	1	CCR5	Chemokine (C-C motif) receptor 5	0	0	43	16	#DIV/0!	0.000248529	0.0696973
GATCCTGAGGATTACAG	s	T	1	CCT6A	Chaperonin containing TCP1, subunit 6A (zeta 1)	22	9	113	25	5.13636	2.18492e-05	0.0406889
GATCCAGCGCCTCGCCC	s	Th	1	CCT7	Chaperonin containing TCP1, subunit 7 (eta)	34	5	138	11	4.05882	9.14025e-06	0.0388462
GATCCATGCCGGCGGTC	s	Th	3	CD14	CD14 molecule	0	0	34	8	#DIV/0!	0.000678084	0.096944
GATCTTCACGTGCTGCC	s	T	1	CD151	CD151 molecule (Raph blood group)	43	2	121	18	2.81395	0.000856368	0.0941994
GATCTGGCATGGAGGTT	s	T	4	CD163	CD163 molecule	0	0	50	4	#DIV/0!	7.58015e-05	0.0512997
GATCCGGGGAGCTAGGA	s	T	1	CD320	CD320 molecule	103	1	269	29	2.61165	2.64041e-06	0.0343782
GATCCAGCAGTTTGGTG	s	Th	1	CD40	CD40 molecule, TNF receptor superfamily member 5	0	0	46	0	#DIV/0!	0.000126201	0.0620318
GATCTATGTTGTTTGCC	s	T	1	CD47	CD47 molecule	7	0	71	17	10.1429	7.11295e-05	0.0512997
GATCCATAAGGAGGGCT	s	Th	1	CD63	CD63 molecule	434	9	1087	79	2.50461	0	0.0343782
GATCCCCGTTCCTGACA	s	T	1	CD74	CD74 molecule, major histocompatibility complex, class II invariant chain	1109	76	2020	276	1.82146	0	0.0343782
GATCCTGAGCATGGTGC	s	T	1	CD81	CD81 molecule	856	29	1550	311	1.81075	2.44249e-14	0.0343782
GATCCCCGGGATTGTGG	s	T	1	CD99	CD99 molecule	183	33	1272	177	6.95082	0	0.0343782
GATCATTCTGAGCTCAG	s	Th	1	CDC23	Cell division cycle 23 homolog (S. cerevisiae)	14	7	131	0	9.35714	7.36451e-08	0.0343782
GATCCTGAGGACCCGGG	s	T	1	CDIPT	CDP-diacylglycerol--inositol 3-phosphatidyltransferase (phosphatidylinositol synthase)	161	5	303	54	1.88199	0.000415663	0.0726439
GATCCCAGGAGAGCTGG	s	T	1	CDK3	Cyclin-dependent kinase 3	12	5	80	7	6.66667	0.000132602	0.0521146
GATCTGAAGCCAGAGAA	s	Th	2	CDK4	Cyclin-dependent kinase 4	0	0	102	110	#DIV/0!	1.16666e-08	0.0343782
GATCTTGGCACTCTCCA	s	T	1	CDK5RAP3	CDK5 regulatory subunit associated protein 3	40	5	115	8	2.875	0.00107609	0.0965841
GATCTTTCTAGGAGGGA	s	T	1	CDKN1A	Cyclin-dependent kinase inhibitor 1A (p21, Cip1)	0	0	72	74	#DIV/0!	2.24757e-06	0.0343782
GATCATCAGTCACCGAA	s	T	1	CDKN2A	Cyclin-dependent kinase inhibitor 2A (melanoma, p16, inhibits CDK4)	0	0	76	4	#DIV/0!	1.25613e-06	0.0343782
GATCCGAGCCAAGGAGG	s	T	1	CDT1	Chromatin licensing and DNA replication factor 1	0	0	111	9	#DIV/0!	6.93007e-09	0.0343782
GATCCTCGTGCCTAAAA	s	T	3	CDYL	Chromodomain protein, Y-like	0	0	37	1	#DIV/0!	0.000824106	0.0922803
GATCCATTCCGGCGCCT	s	T	1	CECR1	Cat eye syndrome chromosome region, candidate 1	18	2	78	17	4.33333	0.00145898	0.0926727
GATCACCTGTTAGCATT	s	Th	1	CENPF	Centromere protein F, 350/400ka (mitosin)	3	3	84	22	28	7.8557e-07	0.0343782
GATCCTCAGCCTCCCAG	s	T	1	CENPL	Centromere protein L	141	9	288	69	2.04255	0.000142388	0.0606868
GATCGTCTGTGAGTTCC	s	T	1	CENTB5	Centaurin, beta 5	237	8	423	38	1.78481	0.000118237	0.0545859
GATCCCCCTTCGAGGTA	s	T	3	CENTD2	Centaurin, delta 2	61	7	264	16	4.32787	1.72517e-09	0.0343782
GATCTCTGCCTTCCCCC	s	Th	5	CENTD3	Centaurin, delta 3	0	0	64	0	#DIV/0!	4.60262e-06	0.0388462
GATCACCAGCAGCTTGC	s	Th	1	CEP57	Centrosomal protein 57kDa	0	0	49	3	#DIV/0!	7.2386e-05	0.0512997
GATCTACGACGCTCCCC	s	Th	4	CEP57	Centrosomal protein 57kDa	0	0	49	17	#DIV/0!	7.2386e-05	0.0512997
GATCTTCCTGGCACCCT	s	T	1	CHADL	Chondroadherin-like	61	4	236	7	3.86885	4.81497e-08	0.0343782
GATCCGCCAGGCCTGTG	s	T	1	CHCHD5	Coiled-coil-helix-coiled-coil-helix domain containing 5	35	7	197	40	5.62857	1.15194e-08	0.0343782
GATCTGGAGTTGAGAGC	s	Th	1	CHCHD8	Coiled-coil-helix-coiled-coil-helix domain containing 8	27	7	220	7	8.14815	6.57074e-12	0.0343782
GATCTGGTGGGCCTCAG	s	Th	1	CHD1L	Chromodomain helicase DNA binding protein 1-like	30	19	98	15	3.26667	0.000909357	0.0970897
GATCGGGCGTGGAGAGC	s	Th	1	CHD2	Chromodomain helicase DNA binding protein 2	0	0	38	8	#DIV/0!	0.000386126	0.0922803
GATCCTATGATGCCAGC	s	Th	1	CHD8	Chromodomain helicase DNA binding protein 8	14	5	74	12	5.28571	0.000413275	0.092717
GATCACAGCTTCACTCC	s	Th	4	CHERP	Calcium homeostasis endoplasmic reticulum protein	0	0	52	9	#DIV/0!	4.15955e-05	0.0503822
GATCCCCAAGCCTGGCA	s	T	1	CHI3L1	Chitinase 3-like 1 (cartilage glycoprotein-39)	38	3	6216	450	163.579	0	0.0343782
GATCATAGATTGGACCT	s	T	1	CHI3L2	Chitinase 3-like 2	0	0	371	20	#DIV/0!	0	0.0343782
GATCGCCACACTGCCAC	s	T	1	CHMP7	CHMP family, member 7	0	0	50	3	#DIV/0!	7.58015e-05	0.0512997
GATCATCAAACGCCAGC	s	T	3	CHST11	Carbohydrate (chondroitin 4) sulfotransferase 11	2	2	132	16	66	1.03646e-09	0.0343782
GATCAGTGCTGAGATAG	s	Th	1	CHST11	Carbohydrate (chondroitin 4) sulfotransferase 11	5	2	74	3	14.8	1.54047e-05	0.0406889
GATCAGGTGCTTTGCTG	s	Th	1	CHST3	Carbohydrate (chondroitin 6) sulfotransferase 3	0	0	72	1	#DIV/0!	1.54173e-06	0.0343782
GATCCGGGTCAGTCACC	s	T	1	CHST7	Carbohydrate (N-acetylglucosamine 6-O) sulfotransferase 7	13	7	98	30	7.53846	8.60426e-06	0.0343782
GATCTGTACTGAGGGGC	s	Th	1	CHST8	Carbohydrate (N-acetylgalactosamine 4-0) sulfotransferase 8	8	8	179	29	22.375	2.30505e-12	0.0343782
GATCTGAGGACACTGCC	s	T	3	CIB2	Calcium and integrin binding family member 2	10	4	184	27	18.4	6.25189e-12	0.0343782
GATCAGACCTTCTTGGG	s	Th	2	CINP	Cyclin-dependent kinase 2-interacting protein	8	4	62	5	7.75	0.000421329	0.0693882
GATCCGGGCGGGTGGGG	s	T	4	CKB	Creatine kinase, brain	143	6	355	31	2.48252	2.41876e-07	0.0343782
GATCTTAACCGCTCTGT	s	Th	1	CLCN5	Chloride channel 5 (nephrolithiasis 2, X-linked, Dent disease)	0	0	57	14	#DIV/0!	1.38001e-05	0.0406889
GATCCTGCGCTCCCAGC	s	Th	4	CLCN7	Chloride channel 7	0	0	51	6	#DIV/0!	4.15955e-05	0.0512997
GATCAGCTGTGTGTGTG	s	Th	1	CLCN7	Chloride channel 7	84	6	194	1	2.30952	0.000235542	0.0699685
GATCCGCTCCTGCCTGC	s	T	3	CLDN5	Claudin 5 (transmembrane protein deleted in velocardiofacial syndrome)	134	7	267	42	1.99254	0.000436095	0.0703981
GATCGCCCTCATGAGTG	s	T	1	CLIP2	CAP-GLY domain containing linker protein 2	211	23	362	109	1.71564	0.000699763	0.0932498
GATCCACCGTACCAGGA	s	T	1	CLK3	CDC-like kinase 3	23	6	95	8	4.13043	0.000278143	0.0629759
GATCGAGTCCGCCATGG	s	Th	1	CLPP	ClpP caseinolytic peptidase, ATP-dependent, proteolytic subunit homolog (E. coli)	95	2	256	33	2.69474	1.96198e-06	0.0343782
GATCAGGCCGGGGCGGT	s	T	1	CLPTM1	Cleft lip and palate associated transmembrane protein 1	100	13	208	9	2.08	0.000873754	0.0947764
GATCAACAACCGGGCAT	s	T	2	CLTB	Clathrin, light chain (Lcb)	25	7	319	56	12.76	0	0.0343782
GATCGCTTGGAGGGTCC	s	Th	1	CLU	Clusterin	22	1	141	6	6.40909	1.40526e-07	0.0343782
GATCCCATCACTGTGAC	s	Th	1	CLU	Clusterin	61	19	284	4	4.65574	1.69094e-11	0.0343782
GATCCTGCACTCTAACA	s	Th	1	CLU	Clusterin	1815	34	2350	77	1.29477	3.20576e-06	0.0435195
GATCTTTTCAGAGTGGT	s	Th	1	CNN3	Calponin 3, acidic	17	8	80	14	4.70588	0.000386682	0.0736103
GATCCCCCTGCCCAGGT	s	T	1	CNOT3	CCR4-NOT transcription complex, subunit 3	60	1	496	31	8.26667	0	0.0343782
GATCCCCTTCTCCCATC	s	T	1	CNOT4	CCR4-NOT transcription complex, subunit 4	0	0	37	5	#DIV/0!	0.000824106	0.0922803
GATCTTTTGTTTTGGGT	s	T	1	CNOT6L	CCR4-NOT transcription complex, subunit 6-like	0	0	37	38	#DIV/0!	0.000824106	0.0922803
GATCACCCCCAGGAGGG	s	Th	1	CNPY2	Canopy 2 homolog (zebrafish)	28	27	126	25	4.5	6.79683e-06	0.0388462
GATCCTGGAGGAGTCCA	s	T	5	CNTNAP1	Contactin associated protein 1	0	0	71	36	#DIV/0!	4.02592e-06	0.0343782
GATCGGGCTGTGGCTGA	s	Th	1	COASY	Coenzyme A synthase	114	21	225	21	1.97368	0.000780043	0.0982267
GATCCTGCTGTCACCCC	s	T	1	COG2	Component of oligomeric golgi complex 2	10	10	97	27	9.7	4.65886e-06	0.0343782
GATCCGTCCTGAGCGTG	s	Th	1	COL18A1	Collagen, type XVIII, alpha 1	8	4	197	5	24.625	1.63203e-13	0.0343782
GATCCGCGCCGAGGGCA	s	T	1	COL1A1	Collagen, type I, alpha 1	0	0	35	20	#DIV/0!	0.000824106	0.096944
GATCAAGGTGCTCCTGG	s	Th	4	COL1A2	Collagen, type I, alpha 2	0	0	67	16	#DIV/0!	2.66252e-06	0.0343782
GATCCACATTGTTAGGT	s	T	1	COL1A2	Collagen, type I, alpha 2	0	0	180	53	#DIV/0!	1.33227e-13	0.0343782
GATCGTGTGCAGTGACA	s	T	3	COL20A1	Collagen, type XX, alpha 1	0	0	169	2	#DIV/0!	7.35634e-13	0.0343782
GATCCTCGGGCTGGGGG	s	T	3	COL27A1	Collagen, type XXVII, alpha 1	12	1	208	17	17.3333	8.21565e-13	0.0343782
GATCCGGGCAGAGGGCA	s	T	1	COL2A1	Collagen, type II, alpha 1 (primary osteoarthritis, spondyloepiphyseal dysplasia, congenital)	0	0	69	4	#DIV/0!	4.02592e-06	0.0343782
GATCCTGGAAGACCCGG	s	T	3	COL6A1	Collagen, type VI, alpha 1	0	0	76	11	#DIV/0!	1.25613e-06	0.0343782
GATCCCATGGGCCGTTC	s	Th	1	COQ4	Coenzyme Q4 homolog (S. cerevisiae)	67	15	175	28	2.61194	0.000102756	0.0610295
GATCAGCCGGCGCAACG	s	Th	1	CORO1B	Coronin, actin binding protein, 1B	0	0	59	8	#DIV/0!	1.38001e-05	0.0406889
GATCAAAAAAGCTCACG	s	Th	3	CORO1C	Coronin, actin binding protein, 1C	0	0	36	9	#DIV/0!	0.000678084	0.096944
GATCGTTTTGTTTTGTT	s	T	1	COTL1	Coactosin-like 1 (Dictyostelium)	0	0	199	14	#DIV/0!	7.77156e-15	0.0343782
GATCTGCATTTGCTACA	s	Th	1	COX7C	Cytochrome c oxidase subunit VIIc	5	2	110	23	22	4.23827e-08	0.0343782
GATCCTTCTAACATGCT	s	T	1	CP	Ceruloplasmin (ferroxidase)	0	0	41	1	#DIV/0!	0.000451822	0.0725022
GATCATCCCCACAGCCA	s	T	1	CPA1	Carboxypeptidase A1 (pancreatic)	0	0	41	6	#DIV/0!	0.000451822	0.0725022
GATCTTCATATTGCTGT	s	T	1	CPNE1	Copine I	0	0	35	12	#DIV/0!	0.000824106	0.096944
GATCGGCACCACACCCG	s	Th	4	CPSF1	Cleavage and polyadenylation specific factor 1, 160kDa	0	0	107	3	#DIV/0!	3.96513e-09	0.0343782
GATCGGCACCACACCAG	s	T	3	CPSF1	Cleavage and polyadenylation specific factor 1, 160kDa	32	30	160	22	5	7.49015e-07	0.0343782
GATCTTTTCCAAGTTCC	s	Th	1	CPT1B	Carnitine palmitoyltransferase 1B (muscle)	5	5	66	8	13.2	7.72305e-05	0.0508427
GATCCAGGACCTGCCCC	s	T	1	CPT1B	Carnitine palmitoyltransferase 1B (muscle)	20	11	87	11	4.35	0.000319838	0.0704762
GATCCCCTTTGTGCTAA	s	Th	1	CPXM1	Carboxypeptidase X (M14 family), member 1	0	0	41	2	#DIV/0!	0.000220483	0.0725022
GATCCGCCTCGTGCCCC	s	T	1	CREB3L1	CAMP responsive element binding protein 3-like 1	3	3	104	9	34.6667	1.01855e-07	0.0343782
GATCCGTGAATTCTCGG	s	T	1	CRMP1	Collapsin response mediator protein 1	126	12	306	32	2.42857	2.42373e-06	0.0343782
GATCGTGATGAGCGTCT	s	Th	1	CROP	Cisplatin resistance-associated overexpressed protein	37	11	120	25	3.24324	0.00018193	0.0700038
GATCGGTTGAGCCCAGG	s	Th	1	CROT	Carnitine O-octanoyltransferase	0	0	75	14	#DIV/0!	8.93539e-07	0.0343782
GATCCCAGCTGATGTGG	s	Th	4	CRYAB	Crystallin, alpha B	0	0	130	67	#DIV/0!	9.18552e-11	0.0343782
GATCCACAGTGCCTGTG	s	T	1	CRYZ	Crystallin, zeta (quinone reductase)	30	5	147	28	4.9	1.37904e-06	0.0343782
GATCACTGCAGCTTCTA	s	Th	2	CSDE1	Cold shock domain containing E1, RNA-binding	83	8	266	11	3.20482	5.02025e-08	0.0343782
GATCGGAGCAGCATTTG	s	Th	3	CSNK1A1	Casein kinase 1, alpha 1	0	0	44	12	#DIV/0!	0.000126201	0.0620318
GATCCATCCGATGGCCT	s	T	1	CSNK2B	Casein kinase 2, beta polypeptide	300	0	655	83	2.18333	6.39501e-10	0.0343782
GATCGGGCCAGGGACAG	s	Th	3	CSPG4	Chondroitin sulfate proteoglycan 4	45	0	175	147	3.88889	9.65547e-07	0.0343782
GATCGAGCTGCTGCGGG	s	Th	2	CTA-126B4.3	CGI-96 protein	0	0	36	7	#DIV/0!	0.000678084	0.096944
GATCATCCCTGGAGGCA	s	T	1	CTBP2	C-terminal binding protein 2	13	3	82	9	6.30769	0.000132602	0.0508427
GATCCCCTGCTGGCTGG	s	T	3	CTDSP1	CTD (carboxy-terminal domain, RNA polymerase II, polypeptide A) small phosphatase 1	25	3	210	14	8.4	6.19409e-11	0.0343782
GATCCATCCATCTCCAG	s	T	2	CTSB	Cathepsin B	0	0	35	20	#DIV/0!	0.000824106	0.096944
GATCGCACCTCGTCCCG	s	Th	1	CUEDC1	CUE domain containing 1	14	2	82	0	5.85714	0.000153191	0.0610295
GATCCCCCCATGCCCCG	s	Th	1	CUX1	Cut-like homeobox 1	42	6	274	26	6.52381	2.60014e-13	0.0343782
GATCTGTGTTTGGGGTT	s	Th	5	CUZD1	CUB and zona pellucida-like domains 1	0	0	46	0	#DIV/0!	0.000126201	0.0620318
GATCTGCCCTGGAGAGG	s	Th	1	CXCR7	Chemokine (C-X-C motif) receptor 7	19	7	113	16	5.94737	2.78471e-06	0.0388462
GATCCCCTCACTACCGA	s	T	1	CXXC1	CXXC finger 1 (PHD domain)	101	24	254	45	2.51485	1.25993e-05	0.0388462
GATCGCAGCTCCTGACA	s	Th	1	CYP19A1	Cytochrome P450, family 19, subfamily A, polypeptide 1	0	0	36	4	#DIV/0!	0.000678084	0.096944
GATCCAAAAAAACTCCA	s	Th	1	CYP39A1	Cytochrome P450, family 39, subfamily A, polypeptide 1	0	0	39	6	#DIV/0!	0.000386126	0.0725022
GATCCAGCCTCCAGGAG	s	T	2	D15Wsu75e	DNA segment, Chr 15, Wayne State University 75, expressed	13	4	113	22	8.69231	9.45635e-07	0.0343782
GATCAACCCACAGAACA	s	T	1	DAD1	Defender against cell death 1	53	5	223	10	4.20755	2.95867e-08	0.0343782
GATCTGGTGCCTGCTGG	s	T	5	DAGLA	Diacylglycerol lipase, alpha	0	0	35	21	#DIV/0!	0.000824106	0.096944
GATCTGTTACAAGTCCT	s	Th	1	DAK	Dihydroxyacetone kinase 2 homolog (S. cerevisiae)	8	4	64	0	8	0.000249785	0.0693882
GATCCCAAACGACTCAC	s	Th	1	DARS	Aspartyl-tRNA synthetase	155	24	336	2	2.16774	4.48871e-06	0.0388462
GATCATCGTGCTCTCAG	s	T	1	DAXX	Death-associated protein 6	41	3	147	2	3.58537	3.7418e-05	0.0406889
GATCGCTTCCTGGTCCT	s	Th	1	DBI	Diazepam binding inhibitor (GABA receptor modulator, acyl-Coenzyme A binding protein)	120	19	348	59	2.9	4.66179e-09	0.0343782
GATCGACATCACATGCT	s	T	1	DBN1	Drebrin 1	0	0	123	31	#DIV/0!	1.23759e-09	0.0343782
GATCCTGTTGGATGTGA	s	T	1	DCBLD2	Discoidin, CUB and LCCL domain containing 2	5	2	167	15	33.4	2.62919e-11	0.0343782
GATCTGTCTCTTTGGCT	s	Th	1	DCTN5	Dynactin 5 (p25)	5	2	48	2	9.6	0.00113701	0.0981535
GATCCAGCAAGAAAGCC	s	T	4	DCUN1D5	DCN1, defective in cullin neddylation 1, domain containing 5 (S. cerevisiae)	0	0	63	10	#DIV/0!	1.29653e-05	0.0388462
GATCACAGCCGGAATGC	s	Th	1	DDAH1	Dimethylarginine dimethylaminohydrolase 1	11	11	84	35	7.63636	3.30951e-05	0.0435195
GATCCTTTCACACCGAG	s	T	4	DDB1	Damage-specific DNA binding protein 1, 127kDa	0	0	37	10	#DIV/0!	0.000824106	0.0922803
GATCTTAAACTCAGTAA	s	Th	1	DDEF1	Development and differentiation enhancing factor 1	0	0	34	1	#DIV/0!	0.000678084	0.096944
GATCCTCTCCACCCTCC	s	T	1	DDR1	Discoidin domain receptor family, member 1	176	17	392	23	2.22727	8.77548e-07	0.0343782
GATCCAGGGCCGGGCAG	s	T	1	DDR2	Discoidin domain receptor family, member 2	0	0	35	3	#DIV/0!	0.000824106	0.096944
GATCCTGGTGGCCACCA	s	T	1	DDX39	DEAD (Asp-Glu-Ala-Asp) box polypeptide 39	45	10	384	34	8.53333	0	0.0343782
GATCACTGACTGCCCCA	s	Th	1	DDX41	DEAD (Asp-Glu-Ala-Asp) box polypeptide 41	106	32	220	10	2.07547	0.000416587	0.0927489
GATCCTGGTAACTGTTC	s	T	3	DDX42	DEAD (Asp-Glu-Ala-Asp) box polypeptide 42	63	3	256	9	4.06349	4.5089e-09	0.0343782
GATCCTGAAGCAGCGGC	s	T	1	DDX54	DEAD (Asp-Glu-Ala-Asp) box polypeptide 54	53	15	145	3	2.73585	0.000428004	0.0702034
GATCATCCTGGAGCTGG	s	T	1	DGCR6L	DiGeorge syndrome critical region gene 6-like	0	0	310	50	#DIV/0!	0	0.0343782
GATCTGACAGATGCCAG	s	Th	4	DGKD	Diacylglycerol kinase, delta 130kDa	0	0	44	2	#DIV/0!	0.000126201	0.0620318
GATCATTCTGGGCGGGG	s	Th	2	DHPS	Deoxyhypusine synthase	0	0	54	7	#DIV/0!	2.39413e-05	0.043986
GATCCAGCCTTCCCTGC	s	T	1	DHRS4	Dehydrogenase/reductase (SDR family) member 4	13	1	176	16	13.5385	7.25846e-11	0.0343782
GATCTGTTGTGCTACAG	s	Th	4	DHTKD1	Dehydrogenase E1 and transketolase domain containing 1	0	0	57	16	#DIV/0!	1.38001e-05	0.0406889
GATCCCACAGGGCCTCC	s	Th	3	DHX35	DEAH (Asp-Glu-Ala-His) box polypeptide 35	19	2	92	13	4.84211	9.00435e-05	0.0610295
GATCTACACTCCAGGCC	s	T	1	DHX38	DEAH (Asp-Glu-Ala-His) box polypeptide 38	20	6	128	12	6.4	9.82469e-07	0.0343782
GATCACGCTACTGCGCT	s	Th	4	DIP2A	DIP2 disco-interacting protein 2 homolog A (Drosophila)	0	0	71	9	#DIV/0!	1.54173e-06	0.0343782
GATCAGTAAGACAAACT	s	Th	1	DKFZp667F0711	Hypothetical protein DKFZp667F0711	0	0	44	2	#DIV/0!	0.000126201	0.0620318
GATCCAGGGTGGCTAAA	s	T	3	DKFZP761N09121	Hypothetical protein DKFZp761N09121	43	12	188	1	4.37209	1.9294e-07	0.0343782
GATCATTGCCGCAGCCA	s	Th	5	DNAH7	Dynein, axonemal, heavy chain 7	0	0	49	10	#DIV/0!	7.2386e-05	0.0512997
GATCTCTTTCTCTCTTT	s	Th	5	DNAJC6	DnaJ (Hsp40) homolog, subfamily C, member 6	0	0	77	15	#DIV/0!	5.183e-07	0.0343782
GATCCGCATGACCATCG	s	Th	1	DNALI1	Dynein, axonemal, light intermediate chain 1	0	0	64	26	#DIV/0!	4.60262e-06	0.0388462
GATCGACAAGTGGGGCA	s	Th	1	DNASE1L2	Deoxyribonuclease I-like 2	6	3	51	1	8.5	0.000663967	0.0931773
GATCGAGCTGGTCTTGG	s	Th	2	DNASE1L3	Deoxyribonuclease I-like 3	0	0	64	13	#DIV/0!	4.60262e-06	0.0388462
GATCAGGCTTCTCAACC	s	T	1	DNM1DN11-6	DNM1DN11.6 duplicon	0	0	46	1	#DIV/0!	0.000137089	0.0620318
GATCCCGGAAGACCCCA	s	T	3	DOCK6	Dedicator of cytokinesis 6	0	0	45	1	#DIV/0!	0.000248529	0.0620318
GATCGATACCAGCCCCG	s	Th	1	DOM3Z	Dom-3 homolog Z (C. elegans)	16	12	89	10	5.5625	5.62863e-05	0.0510659
GATCCTCCCGCCTCCGC	s	T	1	DPY30	Dpy-30 homolog (C. elegans)	15	16	282	31	18.8	0	0.0343782
GATCTGTGCTAGCTGTG	s	Th	1	DPYSL3	Dihydropyrimidinase-like 3	269	6	772	47	2.86989	0	0.0343782
GATCATGCAGACGGACG	s	T	1	DRAP1	DR1-associated protein 1 (negative cofactor 2 alpha)	105	1	232	4	2.20952	0.000189713	0.0624847
GATCGAGCAAGAAGCAG	s	Th	1	DSCAM	Down syndrome cell adhesion molecule	3	0	85	20	28.3333	7.8557e-07	0.0343782
GATCCGGTTTCTTTTTG	s	T	1	DUSP1	Dual specificity phosphatase 1	23	8	136	21	5.91304	9.50325e-07	0.0343782
GATCCACAGTGTGAGCA	s	T	1	DUSP14	Dual specificity phosphatase 14	13	3	76	8	5.84615	0.000228042	0.062894
GATCTCCCTTCAGCAAC	s	Th	1	DUT	DUTP pyrophosphatase	0	0	34	4	#DIV/0!	0.000678084	0.096944
GATCGCACTCCAGCCTG	s	T	5	DVL3	Dishevelled, dsh homolog 3 (Drosophila)	0	0	39	1	#DIV/0!	0.000451822	0.0725022
GATCTAGTCCGGACTTG	s	Th	1	DYRK1A	Dual-specificity tyrosine-(Y)-phosphorylation regulated kinase 1A	0	0	62	58	#DIV/0!	7.965e-06	0.0388462
GATCCTGGAGAGTTTCC	s	T	3	DZIP1L	DAZ interacting protein 1-like	0	0	39	6	#DIV/0!	0.000451822	0.0725022
GATCCTACCTCAGGCCC	s	T	1	E2F8	E2F transcription factor 8	0	0	56	17	#DIV/0!	4.2002e-05	0.043986
GATCAGGCCATCCAGGA	s	Th	1	EBAG9	Estrogen receptor binding site associated, antigen, 9	23	1	90	2	3.91304	0.000500749	0.0729352
GATCTATGCCCACTCCA	s	Th	4	ECHDC1	Enoyl Coenzyme A hydratase domain containing 1	0	0	39	20	#DIV/0!	0.000386126	0.0725022
GATCAACCCTGGTACAA	s	T	2	EDC3	Enhancer of mRNA decapping 3 homolog (S. cerevisiae)	0	0	45	1	#DIV/0!	0.000248529	0.0620318
GATCGCCGTTCTGGTAA	s	Th	1	EEF1A1	Eukaryotic translation elongation factor 1 alpha 1	1590	70	2198	2068	1.38239	3.19362e-08	0.0343782
GATCCTGCCCGGAGACC	s	T	1	EEF2	Eukaryotic translation elongation factor 2	1902	64	2438	20	1.28181	1.24181e-05	0.0444611
GATCCTGACACCCGCCC	s	T	1	EEFSEC	Eukaryotic elongation factor, selenocysteine-tRNA-specific	15	1	121	6	8.06667	9.83556e-07	0.0343782
GATCTTCTGTGGTGCTT	s	T	1	EFEMP1	EGF-containing fibulin-like extracellular matrix protein 1	0	0	50	8	#DIV/0!	7.58015e-05	0.0512997
GATCACTCTGTGGCAGA	s	Th	1	EFNA1	Ephrin-A1	25	2	107	0	4.28	4.8799e-05	0.0510659
GATCCTATGTTGCTGGA	s	T	3	EFTUD2	Elongation factor Tu GTP binding domain containing 2	8	2	67	2	8.375	0.00040716	0.0602665
GATCAAGAAATCAGGAT	s	Th	1	EGLN1	Egl nine homolog 1 (C. elegans)	100	3	235	13	2.35	3.02177e-05	0.0510659
GATCCACTTGCGGCAGA	s	T	4	EGR1	Early growth response 1	7	4	189	23	27	8.75078e-13	0.0343782
GATCCACATTTTTCCCC	s	T	1	EID2	EP300 interacting inhibitor of differentiation 2	38	16	128	3	3.36842	0.000180619	0.0600848
GATCAGTGTTTTCAAGT	s	Th	1	EID2B	EP300 interacting inhibitor of differentiation 2B	2	2	59	2	29.5	6.1436e-05	0.0512997
GATCGTTCTCTGCCTCA	s	Th	3	EIF2AK2	Eukaryotic translation initiation factor 2-alpha kinase 2	0	0	85	7	#DIV/0!	1.74778e-07	0.0343782
GATCATCTGAGCCTCAG	s	T	1	EIF2AK4	Eukaryotic translation initiation factor 2 alpha kinase 4	51	6	139	28	2.72549	0.00064791	0.0732594
GATCCTGGCTGAGGAAA	s	T	1	EIF2B5	Eukaryotic translation initiation factor 2B, subunit 5 epsilon, 82kDa	18	1	180	57	10	4.88498e-10	0.0343782
GATCATGAAGACCTGCT	s	T	1	EIF3F	Eukaryotic translation initiation factor 3, subunit F	35	0	106	4	3.02857	0.00134937	0.0982514
GATCGTGTCCTGCCGCA	s	Th	1	EIF3G	Eukaryotic translation initiation factor 3, subunit G	153	30	471	61	3.07843	7.05214e-13	0.0343782
GATCCCAGAGGCTCTCC	s	T	1	EIF4A1	Eukaryotic translation initiation factor 4A, isoform 1	262	16	704	37	2.68702	1.37668e-14	0.0343782
GATCAGCAGTTCCAGCC	s	T	1	EIF4EBP1	Eukaryotic translation initiation factor 4E binding protein 1	13	4	145	8	11.1538	1.10822e-08	0.0343782
GATCTAAGCTCCAGGCA	s	Th	1	ELAVL1	ELAV (embryonic lethal, abnormal vision, Drosophila)-like 1 (Hu antigen R)	9	0	61	13	6.77778	0.000421329	0.096319
GATCACAGGGCAGAGCC	s	Th	4	ELAVL3	ELAV (embryonic lethal, abnormal vision, Drosophila)-like 3 (Hu antigen C)	0	0	36	9	#DIV/0!	0.000678084	0.096944
GATCTCACTTGGCTCCG	s	Th	1	ELOF1	Elongation factor 1 homolog (S. cerevisiae)	36	37	177	36	4.91667	7.92092e-08	0.0343782
GATCCTCCCCCAAGGTG	s	T	1	EMILIN3	Elastin microfibril interfacer 3	0	0	43	1	#DIV/0!	0.000248529	0.0696973
GATCTACCCCAGGGAGA	s	Th	3	EMP1	Epithelial membrane protein 1	17	5	75	6	4.41176	0.00100607	0.0967551
GATCCTGGAGGCAGCAG	s	T	1	ENDOG	Endonuclease G	86	10	197	10	2.2907	0.000398428	0.0706946
GATCTATCCCTGCGGCC	s	Th	1	ENG	Endoglin (Osler-Rendu-Weber syndrome 1)	19	1	251	18	13.2105	1.11022e-15	0.0343782
GATCCCCTGAGCCCCAG	s	T	4	ENO2	Enolase 2 (gamma, neuronal)	0	0	48	20	#DIV/0!	0.000137089	0.0602665
GATCCCTAATTCTCTCT	s	T	4	EP300	E1A binding protein p300	10	3	76	4	7.6	7.66289e-05	0.0517904
GATCCCCACAACCTCAC	s	T	1	EPHB3	EPH receptor B3	25	9	160	33	6.4	1.10226e-07	0.0343782
GATCATGAAGCCACCGG	s	T	3	EPN2	Epsin 2	186	1	741	30	3.98387	0	0.0343782
GATCCCCGCATGGTGTT	s	T	1	EPS8L2	EPS8-like 2	2	2	97	2	48.5	3.22185e-07	0.0343782
GATCCAGCCAGGCATCT	s	T	1	ERCC3	Excision repair cross-complementing rodent repair deficiency, complementation group 3 (xeroderma pigmentosum group B complementing)	110	6	297	64	2.7	5.04411e-07	0.0343782
GATCTCTCTCGCTGTGA	s	Th	5	ETV6	Ets variant gene 6 (TEL oncogene)	0	0	41	8	#DIV/0!	0.000220483	0.0725022
GATCGGCCCTACTAGAT	s	T	1	EWSR1	Ewing sarcoma breakpoint region 1	445	19	745	104	1.67416	2.68083e-06	0.0343782
GATCTTGCTCAGTAGCT	s	Th	1	EXOC2	Exocyst complex component 2	5	5	48	8	9.6	0.00113701	0.0981535
GATCCCAGTCCGTGGGA	s	T	1	EXOC4	Exocyst complex component 4	17	3	214	4	12.5882	9.86322e-13	0.0343782
GATCGCTTGTGCCTGGG	s	T	5	EXOSC6	Exosome component 6	5	5	188	12	37.6	8.75078e-13	0.0343782
GATCTGTGTAACCCGTC	s	Th	1	FAM105B	Family with sequence similarity 105, member B	0	0	51	4	#DIV/0!	4.15955e-05	0.0512997
GATCCAGACAGCTGGCC	s	T	1	FAM127A	Family with sequence similarity 127, member A	106	8	238	35	2.24528	0.000133024	0.0521146
GATCCCTTGGGGGGCGG	s	Th	5	FAM127A	Family with sequence similarity 127, member A	0	0	39	4	#DIV/0!	0.000386126	0.0725022
GATCCTGCCCTGAATCT	s	T	1	FAM134C	Family with sequence similarity 134, member C	37	18	113	22	3.05405	0.000551486	0.0932286
GATCATCCGGAGTCGGG	s	Th	1	FAM20C	Family with sequence similarity 20, member C	120	25	244	29	2.03333	0.000280411	0.0739636
GATCAAGTGGACTCGTG	s	Th	1	FAM38A	Family with sequence similarity 38, member A	34	4	167	10	4.91176	1.34228e-07	0.0343782
GATCTCTTCAACAAGCT	s	Th	1	FAM39DP	Family with sequence similarity 39, member D pseudogene	167	29	453	24	2.71257	1.53975e-10	0.0343782
GATCAGGCTGGGCCACT	s	Th	1	FAM46B	Family with sequence similarity 46, member B	0	0	52	11	#DIV/0!	4.15955e-05	0.0503822
GATCCGCTGAGCATCCA	s	T	1	FAM50A	Family with sequence similarity 50, member A	100	7	273	16	2.73	9.91217e-07	0.0343782
GATCAAGGCGGGAGGCT	s	Th	1	FAM64A	Family with sequence similarity 64, member A	0	0	36	1	#DIV/0!	0.000678084	0.096944
GATCGACTCCAGTGAGA	s	Th	4	FAM7A2	Family with sequence similarity 7, member A2	0	0	36	16	#DIV/0!	0.000678084	0.096944
GATCGTGGGGACTGCGA	s	Th	1	FANCA	Fanconi anemia, complementation group A	0	0	89	27	#DIV/0!	1.01597e-07	0.0343782
GATCAAATATGGCATCA	s	Th	1	FARSA	Phenylalanyl-tRNA synthetase, alpha subunit	0	0	34	9	#DIV/0!	0.000678084	0.096944
GATCCTGGCTCGGGAAG	s	T	1	FASTK	Fas-activated serine/threonine kinase	206	5	444	10	2.15534	4.12695e-07	0.0343782
GATCATTTGAGGTTGGG	s	Th	3	FBLN7	Fibulin 7	0	0	185	4	#DIV/0!	1.04361e-14	0.0343782
GATCCCCAGAAGCGATG	s	T	2	FBN3	Fibrillin 3	2	2	80	7	40	3.24793e-06	0.0343782
GATCCTGGTAGGGGGTG	s	T	1	FBXL11	F-box and leucine-rich repeat protein 11	55	7	147	2	2.67273	0.000511411	0.0740944
GATCAGTGGACCTGGGA	s	T	1	FBXL18	F-box and leucine-rich repeat protein 18	17	6	115	23	6.76471	2.91786e-06	0.0343782
GATCAGTCATCCACCAG	s	Th	1	FCGBP	Fc fragment of IgG binding protein	0	0	313	16	#DIV/0!	0	0.0343782
GATCTCCCTTCGTGGAG	s	T	1	FCGRT	Fc fragment of IgG, receptor, transporter, alpha	33	5	115	20	3.48485	0.000268501	0.0616339
GATCACGGTTGGGCTGC	s	Th	1	FDX1	Ferredoxin 1	5	1	74	26	14.8	1.54047e-05	0.0406889
GATCCCATCGGCATCCC	s	Th	1	FEV	FEV (ETS oncogene family)	0	0	123	9	#DIV/0!	2.68881e-10	0.0343782
GATCCCTGCCCCACAGA	s	Th	1	FIBP	Fibroblast growth factor (acidic) intracellular binding protein	0	0	71	26	#DIV/0!	1.54173e-06	0.0343782
GATCCCCTCAGAGCAGG	s	T	1	FKSG24	Hypothetical protein MGC12972	15	4	167	22	11.1333	1.34497e-09	0.0343782
GATCCTGTATATCCGCA	s	T	1	FLAD1	FAD1 flavin adenine dinucleotide synthetase homolog (S. cerevisiae)	0	0	45	12	#DIV/0!	0.000248529	0.0620318
GATCGCTGAATTTCTTC	s	Th	1	FLJ10357	Hypothetical protein FLJ10357	0	0	44	2	#DIV/0!	0.000126201	0.0620318
GATCATCCAAGTTGTTG	s	T	5	FLJ11827	Hypothetical protein FLJ11827	0	0	43	1	#DIV/0!	0.000248529	0.0696973
GATCCCAGTTCCAAGCC	s	T	1	FLJ20323	Hypothetical protein FLJ20323	7	0	65	8	9.28571	0.000126029	0.0615627
GATCTGTTTGTGGTACC	s	Th	1	FLJ31306	Hypothetical protein FLJ31306	8	1	61	7	7.625	0.000421329	0.0718367
GATCAAGTTTTCGATGT	s	Th	1	FLJ37644	Hypothetical gene supported by AK094963	2	2	49	13	24.5	0.000320249	0.0693882
GATCCACCCCTGCCCGC	s	T	2	FLJ40142	FLJ40142 protein	0	0	102	7	#DIV/0!	2.19072e-08	0.0343782
GATCGTCTTCACCTCCA	s	T	1	FLJ40330	Similar to protein immuno-reactive with anti-PTH polyclonal antibodies	8	2	61	8	7.625	0.000708636	0.0718367
GATCCTGGTGAAGCACG	s	T	1	FLNA	Filamin A, alpha (actin binding protein 280)	217	30	713	139	3.28571	0	0.0343782
GATCCGCGTTGGGGAGC	s	T	1	FLNC	Filamin C, gamma (actin binding protein 280)	18	4	264	20	14.6667	2.66454e-15	0.0343782
GATCCCACTCCCCCCCC	s	T	1	FLOT1	Flotillin 1	0	0	264	27	#DIV/0!	0	0.0343782
GATCACTCGCCAGAACT	s	Th	3	FLT3LG	Fms-related tyrosine kinase 3 ligand	3	0	61	6	20.3333	3.55173e-05	0.0503822
GATCCTAGTAATTGCCT	s	T	1	FN1	Fibronectin 1	10	4	85	2	8.5	2.50472e-05	0.0406889
GATCAACCTGTGGCTGT	s	Th	1	FNBP1	Formin binding protein 1	16	10	87	2	5.4375	5.62863e-05	0.0510659
GATCTGGCTGTGTTTGT	s	Th	1	FNBP1L	Formin binding protein 1-like	17	4	82	20	4.82353	0.000386682	0.0704762
GATCATGCATTGTTGAG	s	T	1	FOS	V-fos FBJ murine osteosarcoma viral oncogene homolog	115	26	368	32	3.2	6.14488e-10	0.0343782
GATCCCTCGTGGCCGCC	s	Th	2	FOXD1	Forkhead box D1	0	0	36	7	#DIV/0!	0.000678084	0.096944
GATCCCCCGCGAGCCGG	s	T	1	FOXD4	Forkhead box D4	2	2	58	11	29	0.000106657	0.0512997
GATCTGCTTGCCAGAGT	s	T	1	FOXM1	Forkhead box M1	0	0	316	15	#DIV/0!	0	0.0343782
GATCAGCCGAACTCTAG	s	Th	1	FOXN3	Forkhead box N3	5	2	57	3	11.4	0.000226409	0.0630416
GATCCAATCATAGCCAG	s	T	5	FRMD4A	FERM domain containing 4A	0	0	41	3	#DIV/0!	0.000451822	0.0725022
GATCTGGCGGGGGGGGT	s	T	1	FSCN1	Fascin homolog 1, actin-bundling protein (Strongylocentrotus purpuratus)	0	0	139	10	#DIV/0!	7.06593e-11	0.0343782
GATCTGGCGGGGGGCGT	s	Th	1	FSCN1	Fascin homolog 1, actin-bundling protein (Strongylocentrotus purpuratus)	641	44	1289	8	2.01092	2.22045e-16	0.0343782
GATCTTCATGCCCTGGG	s	Th	1	FTL	Ferritin, light polypeptide	722	94	1089	123	1.50831	1.31731e-06	0.0343782
GATCAGTCAGGCCCAGC	s	Th	1	FTSJ3	FtsJ homolog 3 (E. coli)	42	0	134	13	3.19048	0.000132223	0.0616339
GATCCTGAAAGGTTGTC	s	T	3	FUNDC2	FUN14 domain containing 2	8	2	115	5	14.375	2.80199e-07	0.0343782
GATCAGATTGCATGTGA	s	Th	1	FYN	FYN oncogene related to SRC, FGR, YES	106	6	340	31	3.20755	4.19988e-10	0.0343782
GATCCCCCTGGCCAAGG	s	T	1	G0S2	G0/G1switch 2	3	3	82	28	27.3333	3.24793e-06	0.0343782
GATCATACACCCGCCCT	s	Th	4	GABBR1	Gamma-aminobutyric acid (GABA) B receptor, 1	0	0	52	11	#DIV/0!	4.15955e-05	0.0503822
GATCAATGGGTTCCAGT	s	Th	1	GADD45A	Growth arrest and DNA-damage-inducible, alpha	0	0	120	9	#DIV/0!	4.60248e-10	0.0343782
GATCCGATGGAGAAGGG	s	T	1	GADD45B	Growth arrest and DNA-damage-inducible, beta	28	3	301	8	10.75	4.44089e-16	0.0343782
GATCCCAAAGGGGTTGG	s	Th	4	GALNT10	UDP-N-acetyl-alpha-D-galactosamine:polypeptide N-acetylgalactosaminyltransferase 10 (GalNAc-T10)	23	10	85	3	3.69565	0.00123869	0.094873
GATCCCCAGTCATACTG	s	T	4	GALNTL1	UDP-N-acetyl-alpha-D-galactosamine:polypeptide N-acetylgalactosaminyltransferase-like 1	0	0	59	2	#DIV/0!	2.33168e-05	0.0406889
GATCATGTGTGCTCGGG	s	T	1	GANAB	Glucosidase, alpha; neutral AB	0	0	35	5	#DIV/0!	0.000824106	0.096944
GATCATCAGCAATGCCT	s	T	1	GAPDH	Glyceraldehyde-3-phosphate dehydrogenase	3681	53	6786	484	1.84352	0	0.0343782
GATCTCTGAGCTGCCCA	s	T	1	GARS	Glycyl-tRNA synthetase	51	4	215	20	4.21569	7.76903e-08	0.0343782
GATCAGGCTTCCTGCTT	s	Th	1	GATAD1	GATA zinc finger domain containing 1	16	9	102	5	6.375	7.44555e-06	0.0388462
GATCCTCCTGTCTCCAC	s	T	1	GATS	Opposite strand transcription unit to STAG3	0	0	41	20	#DIV/0!	0.000451822	0.0725022
GATCATGGGTGAGGGGT	s	T	1	GBAS	Glioblastoma amplified sequence	128	17	570	11	4.45312	0	0.0343782
GATCCCACTGAAGACCT	s	T	2	GBAS	Glioblastoma amplified sequence	5	5	76	26	15.2	2.26656e-05	0.0388462
GATCCCCCCTACTGGCG	s	T	1	GCS1	Glucosidase I	20	7	121	5	6.05	2.86343e-06	0.0343782
GATCAAGACGAGCCTGG	s	Th	4	GDF15	Growth differentiation factor 15	0	0	75	9	#DIV/0!	8.93539e-07	0.0343782
GATCAAATCCAGCCGGG	s	Th	3	GEMIN4	Gem (nuclear organelle) associated protein 4	0	0	151	1	#DIV/0!	3.68616e-12	0.0343782
GATCTGTGCCCAGAGAC	s	Th	1	GFAP	Glial fibrillary acidic protein	198	52	679	346	3.42929	0	0.0343782
GATCTGTGCCCAGAGAT	s	Th	1	GFAP	Glial fibrillary acidic protein	4468	309	5289	95	1.18375	2.98684e-06	0.0515995
GATCCTGGAGTTTGTGG	s	T	1	GIYD2	GIY-YIG domain containing 2	8	2	280	1	35	0	0.0343782
GATCTTACACTCTGCTT	s	Th	1	GLCCI1	Glucocorticoid induced transcript 1	0	0	57	9	#DIV/0!	1.38001e-05	0.0406889
GATCACCAGAGCCTGCG	s	T	4	GLE1	GLE1 RNA export mediator homolog (yeast)	0	0	46	18	#DIV/0!	0.000137089	0.0620318
GATCGTCGCCCCTCTGC	s	Th	3	GLUL	Glutamate-ammonia ligase (glutamine synthetase)	20	7	118	7	5.9	4.57783e-06	0.0343782
GATCACAAGGCTGCCTG	s	T	1	GM2A	GM2 ganglioside activator	0	0	35	3	#DIV/0!	0.000824106	0.096944
GATCCTGACCAGCAAGC	s	T	1	GNAI2	Guanine nucleotide binding protein (G protein), alpha inhibiting activity polypeptide 2	194	19	605	90	3.11856	5.10703e-15	0.0343782
GATCACGCTCCCCGCCT	s	Th	2	GNAI2	Guanine nucleotide binding protein (G protein), alpha inhibiting activity polypeptide 2	497	30	907	60	1.82495	7.16478e-10	0.0343782
GATCCCAGCAGCCCAGG	s	Th	5	GNAO1	Guanine nucleotide binding protein (G protein), alpha activating activity polypeptide O	2	2	74	12	37	4.00493e-06	0.0343782
GATCTGGAACTAATGGC	s	Th	1	GNB2	Guanine nucleotide binding protein (G protein), beta polypeptide 2	275	22	535	18	1.94545	3.03075e-07	0.0343782
GATCCGCAGAGCTGAGC	s	T	4	GNMT	Glycine N-methyltransferase	0	0	76	8	#DIV/0!	1.25613e-06	0.0343782
GATCAGGAAGCCAAACT	s	Th	5	GOLGA4	Golgi autoantigen, golgin subfamily a, 4	0	0	39	3	#DIV/0!	0.000386126	0.0725022
GATCTGTACCATCCTGT	s	Th	2	GOSR1	Golgi SNAP receptor complex member 1	0	0	98	1	#DIV/0!	2.00256e-08	0.0343782
GATCTGCCTGTCCGGGC	s	T	1	GPAA1	Glycosylphosphatidylinositol anchor attachment protein 1 homolog (yeast)	325	33	609	53	1.87385	5.96253e-07	0.0343782
GATCGTGCCATTGTGCT	s	Th	4	GPBP1	GC-rich promoter binding protein 1	16	16	72	24	4.5	0.000676135	0.092717
GATCAGCCCCAACAGAG	s	Th	1	GPC2	Glypican 2	0	0	61	16	#DIV/0!	7.965e-06	0.0388462
GATCCTGAACTGTCAAG	s	Th	4	GPD1	Glycerol-3-phosphate dehydrogenase 1 (soluble)	0	0	61	17	#DIV/0!	7.965e-06	0.0388462
GATCACCTCCACATCTC	s	T	2	GPR108	G protein-coupled receptor 108	0	0	35	20	#DIV/0!	0.000824106	0.096944
GATCTCTCCTGCTGTAA	s	Th	3	GPR17	G protein-coupled receptor 17	33	3	154	1	4.66667	8.93867e-07	0.0343782
GATCCTGGCTTTCCAGG	s	Th	1	GPR172A	G protein-coupled receptor 172A	8	5	64	16	8	0.000249785	0.0693882
GATCACACTGCTCTTTC	s	Th	3	GPR173	G protein-coupled receptor 173	0	0	38	5	#DIV/0!	0.000386126	0.0922803
GATCTTGAGGGTCTGGC	s	T	1	GPR56	G protein-coupled receptor 56	70	1	219	43	3.12857	1.96632e-06	0.0343782
GATCTGGGCCTGGTGAG	s	Th	1	GPSM1	G-protein signaling modulator 1 (AGS3-like, C. elegans)	83	11	499	19	6.01205	0	0.0343782
GATCTGGGCCTGGCGAG	s	Th	1	GPSM1	G-protein signaling modulator 1 (AGS3-like, C. elegans)	8	8	59	55	7.375	0.000709838	0.0919382
GATCCAACCCAAGGGCA	s	T	1	GPX4	Glutathione peroxidase 4 (phospholipid hydroperoxidase)	1047	13	1944	105	1.85673	0	0.0343782
GATCATCTTGGCTTGGG	s	T	1	GRB10	Growth factor receptor-bound protein 10	0	0	61	12	#DIV/0!	1.29653e-05	0.0388462
GATCCACAGGCAGAGCC	s	T	1	GRHPR	Glyoxylate reductase/hydroxypyruvate reductase	276	6	600	148	2.17391	2.96525e-09	0.0343782
GATCCAAGGAAACGCCT	s	T	1	GRIK1	Glutamate receptor, ionotropic, kainate 1	28	1	119	5	4.25	7.5978e-05	0.043986
GATCCGGGGAAGCTGCG	s	T	1	GRLF1	Glucocorticoid receptor DNA binding factor 1	0	0	199	38	#DIV/0!	7.77156e-15	0.0343782
GATCGGCGGACGCCCAT	s	T	1	GSN	Gelsolin (amyloidosis, Finnish type)	783	58	1803	27	2.30268	0	0.0343782
GATCCGCGGACGCCCAT	s	T	1	GSN	Gelsolin (amyloidosis, Finnish type)	0	0	52	53	#DIV/0!	7.58015e-05	0.0503822
GATCCCCTGAAGGGTCT	s	T	1	GSTT2	Glutathione S-transferase theta 2	53	5	245	21	4.62264	1.56142e-09	0.0343782
GATCAAGGTTGCTCTTC	s	Th	1	GTF2A1	General transcription factor IIA, 1, 19/37kDa	6	3	82	0	13.6667	5.26404e-06	0.0343782
GATCCGCCGGCCGTGGT	s	Th	4	GTF3A	General transcription factor IIIA	0	0	34	2	#DIV/0!	0.000678084	0.096944
GATCACAGGCGTGAGCT	s	Th	3	GTPBP3	GTP binding protein 3 (mitochondrial)	0	0	138	47	#DIV/0!	3.14158e-11	0.0343782
GATCTTCACTCGGCAGA	s	T	1	GUSB	Glucuronidase, beta	75	5	206	27	2.74667	2.47362e-05	0.0406889
GATCGGTGCCTCAGCGT	s	Th	1	H19	H19, imprinted maternally expressed untranslated mRNA	0	0	663	18	#DIV/0!	0	0.0343782
GATCGAGGGCTGGCGGG	s	Th	1	H19	H19, imprinted maternally expressed untranslated mRNA	0	0	44	5	#DIV/0!	0.000126201	0.0620318
GATCACATTTTCTGTTG	s	Th	1	H2AFV	H2A histone family, member V	5	1	59	9	11.8	0.000226409	0.0630416
GATCGCTGATTTCGGTC	s	T	1	H2AFX	H2A histone family, member X	0	0	45	6	#DIV/0!	0.000248529	0.0620318
GATCTCACCGTGGGTCC	s	Th	1	H2AFZ	H2A histone family, member Z	136	3	330	12	2.42647	4.94987e-07	0.0343782
GATCTGCGCTTCCAGAG	s	T	1	H3F3A	H3 histone, family 3A	654	7	2623	342	4.0107	0	0.0343782
GATCCAGAAGAAGTGAC	s	T	1	HADHB	Hydroxyacyl-Coenzyme A dehydrogenase/3-ketoacyl-Coenzyme A thiolase/enoyl-Coenzyme A hydratase (trifunctional protein), beta subunit	61	21	290	34	4.7541	5.67535e-11	0.0343782
GATCAAGGCTGAGCTGC	s	Th	1	HARS	Histidyl-tRNA synthetase	0	0	134	13	#DIV/0!	5.37115e-11	0.0343782
GATCCTGAGAACTTCAG	s	T	1	HBB	Hemoglobin, beta	159	33	646	30	4.06289	0	0.0343782
GATCTGCTTGGAGTTTT	s	T	1	HCFC1	Host cell factor C1 (VP16-accessory protein)	61	3	338	26	5.54098	8.41549e-14	0.0343782
GATCACTCCTTCTGTGG	s	Th	1	hCG_38984	HCG38984	0	0	49	1	#DIV/0!	7.2386e-05	0.0512997
GATCAGGAAGTGAGCGG	s	Th	4	HCN3	Hyperpolarization activated cyclic nucleotide-gated potassium channel 3	0	0	38	8	#DIV/0!	0.000386126	0.0922803
GATCATCACTCCCTGCC	s	T	1	HCST	Hematopoietic cell signal transducer	0	0	39	8	#DIV/0!	0.000451822	0.0725022
GATCTCCTGTTTTTTTC	s	Th	1	HDAC1	Histone deacetylase 1	0	0	69	5	#DIV/0!	2.66252e-06	0.0343782
GATCCAATGGTGCCAAA	s	Th	1	HDAC7A	Histone deacetylase 7A	14	7	93	1	6.64286	2.05325e-05	0.043986
GATCAGGCCAGCGTGTC	s	Th	4	HDGF2	Hepatoma-derived growth factor-related protein 2	0	0	34	15	#DIV/0!	0.000678084	0.096944
GATCCACCCAGGCCTTT	s	Th	1	HEBP2	Heme binding protein 2	0	0	67	16	#DIV/0!	2.66252e-06	0.0343782
GATCCGACACTATGGAC	s	Th	4	HEBP2	Heme binding protein 2	0	0	52	3	#DIV/0!	4.15955e-05	0.0503822
GATCATTTATCAAGACG	s	Th	1	HEL308	DNA helicase HEL308	0	0	49	1	#DIV/0!	7.2386e-05	0.0512997
GATCTCCTCCCTCCTCC	s	Th	1	HES6	Hairy and enhancer of split 6 (Drosophila)	23	23	144	38	6.26087	2.35225e-07	0.0343782
GATCATGGTGTGCGAGT	s	T	1	HEY1	Hairy/enhancer-of-split related with YRPW motif 1	50	2	167	171	3.34	1.60688e-05	0.0388462
GATCCCCGACCTCGTGG	s	T	4	HIC1	Hypermethylated in cancer 1	0	0	43	16	#DIV/0!	0.000248529	0.0696973
GATCTCGCCCTTACCCC	s	Th	1	HIG2	Hypoxia-inducible protein 2	0	0	128	7	#DIV/0!	1.57133e-10	0.0343782
GATCGCACTGCTGTACC	s	Th	4	HIG2	Hypoxia-inducible protein 2	2	2	126	15	63	7.11308e-10	0.0343782
GATCACACACTAATGTA	s	Th	1	HIP2	Huntingtin interacting protein 2	0	0	38	2	#DIV/0!	0.000386126	0.0922803
GATCATTTTTTCGGTCT	s	Th	1	HIPK2	Homeodomain interacting protein kinase 2	161	7	602	14	3.73913	0	0.0343782
GATCCCACCCAAATCCA	s	T	1	HIST1H2BD	Histone cluster 1, H2bd	0	0	78	9	#DIV/0!	1.25613e-06	0.0343782
GATCCTGGAGCTGGCGG	s	T	1	HIST2H2AA3	Histone cluster 2, H2aa3	60	9	251	11	4.18333	3.21873e-09	0.0343782
GATCACTGGAGCTGTGG	s	Th	1	HLA-A	Major histocompatibility complex, class I, A	648	77	2213	8	3.41512	0	0.0343782
GATCTGTGTTTCCTCCC	s	Th	1	HLA-B	Major histocompatibility complex, class I, B	6	3	438	24	73	0	0.0343782
GATCACACTGACCTGGC	s	Th	1	HLA-B	Major histocompatibility complex, class I, B	294	30	1742	89	5.92517	0	0.0343782
GATCAAACGAACTGTGG	s	Th	1	HLA-C	Major histocompatibility complex, class I, C	0	0	61	7	#DIV/0!	7.965e-06	0.0388462
GATCTGACGGAAGGCGG	s	Th	5	HLA-DQA1	Major histocompatibility complex, class II, DQ alpha 1	0	0	46	17	#DIV/0!	0.000126201	0.0620318
GATCCAGAATGGAGACT	s	T	1	HLA-DRB1	Major histocompatibility complex, class II, DR beta 1	33	5	431	98	13.0606	0	0.0343782
GATCCACAATGGAGACT	s	T	1	HLA-DRB1	Major histocompatibility complex, class II, DR beta 1	37	9	212	16	5.72973	1.45503e-09	0.0343782
GATCCAGCGGCAGTGAC	s	T	1	HM13	Histocompatibility (minor) 13	86	3	537	67	6.24419	0	0.0343782
GATCCCGAGACTCTGCT	s	T	1	HMBS	Hydroxymethylbilane synthase	15	1	84	4	5.6	0.000212415	0.0610295
GATCCCAATGCACCCAA	s	T	1	HMGB1	High-mobility group box 1	700	228	1012	768	1.44571	4.95151e-05	0.0515995
GATCAAAAGTGAACACC	s	Th	1	HMGB2	High-mobility group box 2	47	5	303	11	6.44681	8.43769e-15	0.0343782
GATCAAATCCACAAACC	s	Th	1	HMGB3	High-mobility group box 3	23	2	157	4	6.82609	3.22638e-08	0.0343782
GATCCTCAACCAATAAA	s	T	1	HMGN1	High-mobility group nucleosome binding domain 1	13	14	65	8	5	0.00114372	0.0968229
GATCTGCGGTTTTGGCT	s	T	1	HMGN2	High-mobility group nucleosomal binding domain 2	2	2	74	76	37	1.03594e-05	0.0343782
GATCCGCGAGGTTGTCT	s	T	2	HMGN2	High-mobility group nucleosomal binding domain 2	40	8	117	14	2.925	0.000694067	0.0929626
GATCAGCCCTGCCCTTC	s	Th	1	HMOX1	Heme oxygenase (decycling) 1	23	4	261	9	11.3478	2.66454e-15	0.0343782
GATCTGAAGGGAGAAGG	s	T	1	HN1	Hematological and neurological expressed 1	5	5	80	4	16	1.27976e-05	0.0343782
GATCCAAACACCAAGCG	s	Th	1	HNRNPA1	Heterogeneous nuclear ribonucleoprotein A1	17	8	107	10	6.29412	7.58293e-06	0.0388462
GATCACTGACTCTTGGT	s	Th	1	HNRPH1	Heterogeneous nuclear ribonucleoprotein H1 (H)	105	1	216	4	2.05714	0.00057215	0.0941994
GATCGCATGGCCACCGG	s	T	1	HNRPM	Heterogeneous nuclear ribonucleoprotein M	0	0	102	41	#DIV/0!	2.19072e-08	0.0343782
GATCCGGGAGGGTGGGG	s	T	1	HNT	Neurotrimin	78	35	215	2	2.75641	1.96772e-05	0.0388462
GATCGAAGTGTTCCGTC	s	Th	1	HRASLS	HRAS-like suppressor	6	3	202	4	33.6667	1.39888e-14	0.0343782
GATCTGGCTCCCATAGG	s	Th	1	HSD17B10	Hydroxysteroid (17-beta) dehydrogenase 10	31	4	257	31	8.29032	4.50751e-14	0.0343782
GATCAACAATGCTGGGG	s	Th	1	HSD17B2	Hydroxysteroid (17-beta) dehydrogenase 2	0	0	36	10	#DIV/0!	0.000678084	0.096944
GATCAGCGAGGCCGACA	s	Th	1	HSPA1A	Heat shock 70kDa protein 1A	77	11	684	32	8.88312	0	0.0343782
GATCAGCGAGGCGGACA	s	Th	1	HSPA1A	Heat shock 70kDa protein 1A	405	19	613	15	1.51358	0.000276432	0.091975
GATCACCATCCCAGTCA	s	Th	1	HSPB1	Heat shock 27kDa protein 1	20	1	84	22	4.2	0.000564192	0.0925335
GATCTGAACCCAGGGTG	s	Th	1	HSPB7	Heat shock 27kDa protein family, member 7 (cardiovascular)	2	2	44	5	22	0.000556847	0.0920388
GATCCCCAACATGCTGC	s	Th	1	HSPC152	Hypothetical protein HSPC152	0	0	34	8	#DIV/0!	0.000678084	0.096944
GATCCTACTGACAGCCA	s	T	1	HSPC171	HSPC171 protein	27	14	206	38	7.62963	1.06321e-10	0.0343782
GATCCGCAGGCAGAAGC	s	T	1	HTRA1	HtrA serine peptidase 1	616	79	951	86	1.54383	6.32297e-06	0.0388462
GATCTGCCTGCCTATGA	s	T	1	HUWE1	HECT, UBA and WWE domain containing 1	48	10	139	16	2.89583	0.00035344	0.0696973
GATCCACAGGCGGGTGC	s	T	3	HYPE	Huntingtin interacting protein E	27	6	108	5	4	0.000145313	0.0608019
GATCACTGAGGCCAGCC	s	Th	1	ICT1	Immature colon carcinoma transcript 1	0	0	71	13	#DIV/0!	1.54173e-06	0.0343782
GATCAAACTAGCTCAGG	s	T	1	IDH1	Isocitrate dehydrogenase 1 (NADP+), soluble	0	0	227	28	#DIV/0!	2.22045e-16	0.0343782
GATCCAGTTCTCTCAGG	s	T	3	IDUA	Iduronidase, alpha-L-	15	1	108	10	7.2	8.61262e-06	0.0343782
GATCTCCATCTTTGGCT	s	Th	1	IER5L	Immediate early response 5-like	6	6	51	9	8.5	0.000663967	0.0931773
GATCAAGAATCCTGCTC	s	Th	1	IFI30	Interferon, gamma-inducible protein 30	0	0	75	19	#DIV/0!	8.93539e-07	0.0343782
GATCCACTTCCAGAAGC	s	T	3	IFI35	Interferon-induced protein 35	7	3	74	2	10.5714	4.01493e-05	0.0503822
GATCCCAGAAGGCTGAG	s	T	5	IFI35	Interferon-induced protein 35	0	0	45	6	#DIV/0!	0.000248529	0.0620318
GATCAGTATGAAGAAGC	s	Th	1	IFIT2	Interferon-induced protein with tetratricopeptide repeats 2	0	0	51	9	#DIV/0!	4.15955e-05	0.0512997
GATCAAGCCATCGGAGC	s	Th	1	IFNGR2	Interferon gamma receptor 2 (interferon gamma transducer 1)	77	7	264	11	3.42857	1.26073e-08	0.0343782
GATCTACGCTGCCTTCA	s	Th	1	IFRD2	Interferon-related developmental regulator 2	2	2	103	10	51.5	3.06864e-08	0.0343782
GATCCAAAACGCTTCGA	s	Th	1	IGF2	Insulin-like growth factor 2 (somatomedin A)	19	6	220	7	11.5789	1.9984e-13	0.0343782
GATCCAGGGAGCCCCCC	s	Th	1	IGFBP2	Insulin-like growth factor binding protein 2, 36kDa	0	0	66	61	#DIV/0!	4.60262e-06	0.0343782
GATCCAGGGAGCCCCCA	s	T	1	IGFBP2	Insulin-like growth factor binding protein 2, 36kDa	58	3	1326	51	22.8621	0	0.0343782
GATCCCTCAACCAAGAA	s	T	4	IGFBP3	Insulin-like growth factor binding protein 3	0	0	43	10	#DIV/0!	0.000248529	0.0696973
GATCATGCCCCTTCTCT	s	T	2	IGFBP5	Insulin-like growth factor binding protein 5	30	9	130	23	4.33333	1.72513e-05	0.0388462
GATCACACATCAAGACT	s	Th	1	IGFBP7	Insulin-like growth factor binding protein 7	31	2	148	15	4.77419	9.52668e-07	0.0343782
GATCCCAGGGGAGGGGT	s	T	1	IGL@	Immunoglobulin lambda locus	80	7	193	36	2.4125	0.000210635	0.0622268
GATCATGGGTTGGGGTG	s	T	1	IHPK1	Inositol hexaphosphate kinase 1	71	69	325	9	4.57746	5.55289e-12	0.0343782
GATCGGGAACGAGAGCG	s	Th	3	IK	IK cytokine, down-regulator of HLA II	2	2	44	5	22	0.000556847	0.0920388
GATCCCGCAACCGAGGA	s	Th	1	IL32	Interleukin 32	12	10	72	2	6	0.000256974	0.0702513
GATCCTTGGCCAGGAGG	s	T	1	ILF2	Interleukin enhancer binding factor 2, 45kDa	211	7	559	60	2.64929	1.32971e-11	0.0343782
GATCAGCGGTTCTTTTT	s	T	3	ILF3	Interleukin enhancer binding factor 3, 90kDa	7	3	208	6	29.7143	5.15143e-14	0.0343782
GATCCCAGGGAGGAAGT	s	Th	1	ILF3	Interleukin enhancer binding factor 3, 90kDa	25	10	272	12	10.88	6.66134e-16	0.0343782
GATCAGGTGGTCAAGGT	s	Th	1	ILVBL	IlvB (bacterial acetolactate synthase)-like	47	5	220	16	4.68085	2.45709e-09	0.0343782
GATCCAGCACACCTCCC	s	T	1	IMPDH2	IMP (inosine monophosphate) dehydrogenase 2	0	0	106	15	#DIV/0!	1.23182e-08	0.0343782
GATCCAGCACACCTCCT	s	Th	1	IMPDH2	IMP (inosine monophosphate) dehydrogenase 2	84	0	197	8	2.34524	0.000165789	0.0631075
GATCCACCAGGTCATCT	s	Th	1	ING4	Inhibitor of growth family, member 4	0	0	46	40	#DIV/0!	0.000126201	0.0620318
GATCTGCAGTCCTGCCT	s	T	1	IQGAP3	IQ motif containing GTPase activating protein 3	0	0	150	2	#DIV/0!	1.27309e-11	0.0343782
GATCCAGCCCTGCGTCT	s	T	4	IQSEC3	IQ motif and Sec7 domain 3	61	1	234	9	3.83607	7.68359e-08	0.0343782
GATCCTCCAGAAAGTCG	s	T	1	IRAK1	Interleukin-1 receptor-associated kinase 1	101	14	214	18	2.11881	0.000684427	0.0816905
GATCATCCCTCCTGCTG	s	T	5	ITGA3	Integrin, alpha 3 (antigen CD49C, alpha 3 subunit of VLA-3 receptor)	0	0	54	8	#DIV/0!	4.2002e-05	0.043986
GATCCACCTGAGCGACC	s	T	1	ITGB2	Integrin, beta 2 (complement component 3 receptor 3 and 4 subunit)	33	1	136	6	4.12121	1.49787e-05	0.0388462
GATCCCTACCGCAGTAG	s	Th	4	ITM2B	Integral membrane protein 2B	0	0	75	4	#DIV/0!	8.93539e-07	0.0343782
GATCCTGGGCTCATAGG	s	Th	1	IVD	Isovaleryl Coenzyme A dehydrogenase	14	2	146	0	10.4286	5.53356e-09	0.0343782
GATCCAGGCTTCTGCCA	s	T	3	JARID1A	Jumonji, AT rich interactive domain 1A	0	0	54	7	#DIV/0!	4.2002e-05	0.043986
GATCTGCGGCAAAGTGT	s	T	4	JARID2	Jumonji, AT rich interactive domain 2	0	0	35	12	#DIV/0!	0.000824106	0.096944
GATCGGAGGCTGCAGTG	s	Th	1	JTV1	JTV1 gene	22	1	85	10	3.86364	0.000564192	0.094873
GATCAAGGTCTGCAAGG	s	Th	1	KARS	Lysyl-tRNA synthetase	86	5	241	4	2.80233	1.57177e-06	0.0343782
GATCCCTCCACGCAGCG	s	T	2	KCNAB3	Potassium voltage-gated channel, shaker-related subfamily, beta member 3	7	6	84	0	12	7.2271e-06	0.0388462
GATCACCACAGCCATCA	s	T	4	KCND3	Potassium voltage-gated channel, Shal-related subfamily, member 3	0	0	35	3	#DIV/0!	0.000824106	0.096944
GATCTGTCATGACCAGA	s	T	1	KCNIP1	Kv channel interacting protein 1	40	2	158	6	3.95	4.17471e-06	0.0343782
GATCCAGTCGGCCTGGA	s	T	3	KCNQ2	Potassium voltage-gated channel, KQT-like subfamily, member 2	3	3	189	29	63	2.00728e-13	0.0343782
GATCCATGTCCGGCGCC	s	Th	1	KCTD13	Potassium channel tetramerisation domain containing 13	180	23	358	28	1.98889	2.02147e-05	0.0444611
GATCCAGACTTAGGGAC	s	Th	1	KCTD2	Potassium channel tetramerisation domain containing 2	52	22	167	43	3.21154	1.52508e-05	0.0435195
GATCAGACTCTTCCACC	s	Th	1	KCTD4	Potassium channel tetramerisation domain containing 4	5	1	61	13	12.2	0.000132225	0.0609844
GATCTGTTCCATCCGTT	s	Th	1	KCTD5	Potassium channel tetramerisation domain containing 5	19	2	80	2	4.21053	0.000386682	0.0962888
GATCCCATGGCTCTCAC	s	T	1	KDELR1	KDEL (Lys-Asp-Glu-Leu) endoplasmic reticulum protein retention receptor 1	58	1	201	10	3.46552	2.299e-06	0.0343782
GATCCGGGTGTCCGTGG	s	T	1	KHK	Ketohexokinase (fructokinase)	45	7	128	10	2.84444	0.000680404	0.0916794
GATCTGCCACTGGAGAC	s	Th	2	KIAA0020	KIAA0020	0	0	103	7	#DIV/0!	6.79992e-09	0.0343782
GATCGTGTTGGGCATAG	s	T	1	KIAA0152	KIAA0152	0	0	39	3	#DIV/0!	0.000451822	0.0725022
GATCACTCTGAAAGATT	s	Th	1	KIAA0280	KIAA0280	0	0	38	5	#DIV/0!	0.000386126	0.0922803
GATCCCCAGGGCCTCTT	s	T	3	KIAA0415	KIAA0415	51	0	149	37	2.92157	0.00028131	0.0606868
GATCCCGGGAGTTACAG	s	T	1	KIAA0664	KIAA0664	95	8	286	16	3.01053	1.54625e-07	0.0343782
GATCGTCATTTCCAAGG	s	T	1	KIAA0888	KIAA0888 protein	8	1	59	21	7.375	0.00123121	0.0919382
GATCCCCCAAGGTCTCC	s	Th	1	KIAA1183	KIAA1183 protein	11	1	89	3	8.09091	1.97618e-05	0.0388462
GATCCCCAGGGTTTCTT	s	T	1	KIAA1545	KIAA1545 protein	10	0	89	5	8.9	1.43053e-05	0.0388462
GATCAGGCAGTCTGCTC	s	Th	1	KIAA1706	KIAA1706 protein	5	5	108	25	21.6	7.23653e-08	0.0343782
GATCTGCCACAATTTGC	s	Th	1	KIAA1706	KIAA1706 protein	0	0	34	6	#DIV/0!	0.000678084	0.096944
GATCTGCGAGAAGTTTG	s	T	1	KIAA1787	KIAA1787 protein	7	7	59	10	8.42857	0.000395706	0.0919382
GATCCTGGAGCCCGGAA	s	T	1	KIAA1949	KIAA1949	32	6	156	15	4.875	1.24147e-06	0.0343782
GATCCCCGCAGTCTTCA	s	T	4	KIF22	Kinesin family member 22	0	0	132	17	#DIV/0!	2.2185e-10	0.0343782
GATCCATCCGGAGGAAG	s	T	1	KIFC3	Kinesin family member C3	43	2	163	22	3.7907	5.73593e-06	0.0343782
GATCTTCCTGGAAATGA	s	T	4	KLF6	Kruppel-like factor 6	0	0	50	4	#DIV/0!	7.58015e-05	0.0512997
GATCTTGTCCAAGCAGT	s	Th	1	KLHDC8A	Kelch domain containing 8A	6	0	51	4	8.5	0.000663967	0.0931773
GATCGGAGTCGCCAGGC	s	Th	1	KNTC1	Kinetochore associated 1	0	0	49	53	#DIV/0!	7.2386e-05	0.0512997
GATCCCATTCCACCCTG	s	Th	3	KPTN	Kaptin (actin binding protein)	8	1	54	24	6.75	0.00119423	0.0943182
GATCCCACACCCGACAT	s	Th	1	KRI1	KRI1 homolog (S. cerevisiae)	5	5	52	40	10.4	0.000663967	0.0741054
GATCGCTTAAACCCAGG	s	Th	1	KRIT1	KRIT1, ankyrin repeat containing	0	0	62	8	#DIV/0!	7.965e-06	0.0388462
GATCTCATCAGCGTGCA	s	Th	1	KSR1	Kinase suppressor of ras 1	5	1	66	12	13.2	7.72305e-05	0.0508427
GATCACAGGGAGCCTGT	s	Th	1	LAMA4	Laminin, alpha 4	0	0	118	17	#DIV/0!	7.88077e-10	0.0343782
GATCGGGCCTTACCGTG	s	Th	1	LAMB1	Laminin, beta 1	44	2	134	29	3.04545	0.000132223	0.0702513
GATCTACAACACCTGCC	s	Th	1	LAMB2	Laminin, beta 2 (laminin S)	6	6	69	24	11.5	4.51162e-05	0.0444611
GATCCCCGGCACACACT	s	Th	3	LAMC3	Laminin, gamma 3	0	0	64	10	#DIV/0!	4.60262e-06	0.0388462
GATCAGTTCAGCCAAGC	s	Th	2	LAPTM5	Lysosomal associated multispanning membrane protein 5	52	9	185	4	3.55769	1.17032e-06	0.0343782
GATCCAGACCCACATCT	s	T	4	LARP7	La ribonucleoprotein domain family, member 7	3	3	54	12	18	0.000191644	0.0600848
GATCAGCCACATCAACT	s	Th	1	LAS1L	LAS1-like (S. cerevisiae)	6	3	156	27	26	2.40874e-11	0.0343782
GATCAAACCTTTCTGGC	s	Th	1	LASP1	LIM and SH3 protein 1	103	19	256	30	2.48544	5.92591e-06	0.0388462
GATCCTGCCATTGCACC	s	T	4	LASS2	LAG1 homolog, ceramide synthase 2	0	0	136	40	#DIV/0!	1.25182e-10	0.0343782
GATCCCCTTCCTATCAA	s	T	1	LASS5	LAG1 homolog, ceramide synthase 5	0	0	175	37	#DIV/0!	4.16334e-13	0.0343782
GATCGGTGTTTGAAAAT	s	Th	4	LBR	Lamin B receptor	0	0	39	3	#DIV/0!	0.000386126	0.0725022
GATCCGCGTCCCTGGCT	s	T	1	LCAT	Lecithin-cholesterol acyltransferase	8	2	80	4	10	4.38268e-05	0.0388462
GATCCCCCCACAGCCCC	s	T	1	LGALS3BP	Lectin, galactoside-binding, soluble, 3 binding protein	134	3	349	53	2.60448	1.78448e-07	0.0343782
GATCAGGGTTCACTTCT	s	Th	3	LHFPL3	Lipoma HMGIC fusion partner-like 3	0	0	100	10	#DIV/0!	1.16666e-08	0.0343782
GATCCCAGCTACCTGAG	s	Th	1	LIMD1	LIM domains containing 1	0	0	72	27	#DIV/0!	1.54173e-06	0.0343782
GATCTCCTGCGCCCACA	s	Th	1	LIME1	Lck interacting transmembrane adaptor 1	52	9	146	3	2.80769	0.000177722	0.0702034
GATCTGGGCTGCAGGAG	s	Th	1	LMNA	Lamin A/C	109	7	280	19	2.56881	9.31582e-07	0.0343782
GATCGGGTTGAGGATTG	s	Th	1	LOC100093631	General transcription factor II, i, pseudogene	759	48	1694	140	2.23188	0	0.0343782
GATCCAAGAGTCCAGAC	s	T	2	LOC147650	Hypothetical protein LOC147650	0	0	43	1	#DIV/0!	0.000248529	0.0696973
GATCCCCATCAGTGCCC	s	T	3	LOC151534	Hypothetical protein BC009264	0	0	59	1	#DIV/0!	2.33168e-05	0.0406889
GATCATCCGCTGAGGGT	s	Th	4	LOC23117	KIAA0220-like protein	6	6	48	1	8	0.00113701	0.0981535
GATCTGAGCTATGCAGG	s	Th	2	LOC254559	Hypothetical protein LOC254559	0	0	84	22	#DIV/0!	1.74778e-07	0.0343782
GATCCCTCTCAGCTTCT	s	Th	1	LOC257407	Hypothetical protein LOC257407	5	1	49	7	9.8	0.00113701	0.0931773
GATCCCTTTGTCCTTTG	s	T	1	LOC283174	Hypothetical protein LOC283174	15	2	93	5	6.2	7.35915e-05	0.043986
GATCTGCCGCTAACTTT	s	Th	1	LOC284702	Hypothetical protein LOC284702	30	4	103	6	3.43333	0.000380253	0.0742493
GATCCACGTGCCCGGCC	s	T	1	LOC342892	Hypothetical protein LOC342892	0	0	93	16	#DIV/0!	1.23675e-07	0.0343782
GATCAGGAGGGGAGAAG	s	Th	1	LOC348262	Hypothetical protein LOC348262	203	12	349	12	1.71921	0.000426782	0.0963412
GATCAGCTCTGCACACC	s	Th	5	LOC388135	Similar to RIKEN cDNA 6030419C18 gene	0	0	48	9	#DIV/0!	7.2386e-05	0.0602665
GATCCAAAGCCAGATGA	s	Th	1	LOC388514	Similar to cytochrome P450, family 4, subfamily F, polypeptide 12	0	0	74	4	#DIV/0!	8.93539e-07	0.0343782
GATCCACTGTTCAATCT	s	T	1	LOC388796	Hypothetical LOC388796	3	3	72	7	24	1.03594e-05	0.0343782
GATCATGCCATTTCCCT	s	T	1	LOC389247	Hypothetical gene supported by BC038563	0	0	41	14	#DIV/0!	0.000451822	0.0725022
GATCTCAACCTCGCTTG	s	Th	1	LOC389831	Hypothetical gene supported by AL713796	2	2	85	13	42.5	7.8557e-07	0.0343782
GATCCCTGCGTGTTGGC	s	Th	1	LOC402573	Hypothetical LOC402573	0	0	51	2	#DIV/0!	4.15955e-05	0.0512997
GATCCACTCTCCCACCT	s	T	4	LOC550643	Hypothetical protein LOC550643	0	0	54	7	#DIV/0!	4.2002e-05	0.043986
GATCCGAGTCCGCGGGT	s	T	3	LOC643665	Hypothetical LOC643665	7	6	78	6	11.1429	2.26656e-05	0.0406889
GATCGCCGGGGAGCGTG	s	T	1	LOC645323	Hypothetical LOC645323	5	5	123	1	24.6	2.40991e-08	0.0343782
GATCCACACGCTGGCCC	s	T	1	LOC652968	Hypothetical protein LOC652968	3	3	95	11	31.6667	3.22185e-07	0.0343782
GATCACTTCAGCTGCCT	s	Th	1	LOC653354	Similar to amrmadillo repeat containing, X-linked 6 (H. sapiens)-like	41	14	185	7	4.5122	4.65499e-08	0.0343782
GATCGCACACTACCGTA	s	Th	1	LOC728190	Hypothetical protein LOC728190	5	1	82	3	16.4	5.26404e-06	0.0343782
GATCAGAGCACTGAGAA	s	Th	1	LOC728411	Similar to Beta-glucuronidase precursor	0	0	36	20	#DIV/0!	0.000678084	0.096944
GATCATCGCAAGGAAGG	s	T	1	LOC728844	Hypothetical protein LOC728844	38	3	227	17	5.97368	4.88062e-10	0.0343782
GATCCCACCAGTGCACT	s	T	5	LOC729047	Hypothetical protein LOC729047	0	0	39	40	#DIV/0!	0.000451822	0.0725022
GATCCCAGAATGCTCAG	s	Th	1	LOC730051	Similar to Zinc finger protein 418	0	0	41	2	#DIV/0!	0.000220483	0.0725022
GATCGCTCTCACTGGCC	s	Th	1	LRCH4	Leucine-rich repeats and calponin homology (CH) domain containing 4	12	0	85	23	7.08333	3.30951e-05	0.0444611
GATCAGGTTTTAGGGTC	s	T	1	LRP10	Low density lipoprotein receptor-related protein 10	38	0	119	8	3.13158	0.000694067	0.0719919
GATCTGTTTCTAAAGCG	s	Th	1	LRPPRC	Leucine-rich PPR-motif containing	2	2	79	7	39.5	2.32542e-06	0.0343782
GATCCGATTTGTGGAGG	s	T	1	LRRC1	Leucine rich repeat containing 1	13	4	76	15	5.84615	0.000228042	0.062894
GATCCTCGCTTCCAGGA	s	T	1	LRRC37B2	Leucine rich repeat containing 37, member B2	0	0	35	16	#DIV/0!	0.000824106	0.096944
GATCCCCTCCCCTGCCC	s	T	1	LRRC41	Leucine rich repeat containing 41	71	25	189	55	2.66197	0.000104972	0.0505712
GATCGTTCTGCAGTGGG	s	Th	1	LRRC42	Leucine rich repeat containing 42	17	1	84	8	4.94118	0.000238558	0.0704762
GATCTTGGGAGATGTGG	s	T	1	LSM3	LSM3 homolog, U6 small nuclear RNA associated (S. cerevisiae)	15	4	95	11	6.33333	4.31657e-05	0.0406889
GATCCGGGTAAAGTTCC	s	T	1	LSM7	LSM7 homolog, U6 small nuclear RNA associated (S. cerevisiae)	61	3	169	28	2.77049	0.000140982	0.0517904
GATCCAAGGGGAAACTG	s	T	1	LSP1	Lymphocyte-specific protein 1	0	0	69	3	#DIV/0!	4.02592e-06	0.0343782
GATCTTTCCAGTGTCAG	s	Th	4	LTBP3	Latent transforming growth factor beta binding protein 3	0	0	59	5	#DIV/0!	1.38001e-05	0.0406889
GATCCTGGACGGCTGCA	s	T	1	LTBP4	Latent transforming growth factor beta binding protein 4	60	4	193	48	3.21667	5.64119e-06	0.0343782
GATCTGACTGCCCGGAC	s	T	2	LTF	Lactotransferrin	0	0	364	25	#DIV/0!	0	0.0343782
GATCTGAACCCGTCTCC	s	Th	1	LUC7L	LUC7-like (S. cerevisiae)	200	35	381	50	1.905	2.62364e-05	0.0508427
GATCTACCTCCCGAGAG	s	Th	1	LUC7L	LUC7-like (S. cerevisiae)	6	6	51	1	8.5	0.000663967	0.0931773
GATCCTCCGAATCTGGT	s	T	1	LYPD1	LY6/PLAUR domain containing 1	53	1	466	51	8.79245	0	0.0343782
GATCCAGTGTGACATGT	s	T	4	MACF1	Microtubule-actin crosslinking factor 1	0	0	52	14	#DIV/0!	7.58015e-05	0.0503822
GATCGCCCGCCCCAGCC	s	Th	1	MAD2L2	MAD2 mitotic arrest deficient-like 2 (yeast)	22	1	361	48	16.4091	0	0.0343782
GATCGCAGTTTGGAAAC	s	Th	4	MAFB	V-maf musculoaponeurotic fibrosarcoma oncogene homolog B (avian)	5	2	48	2	9.6	0.00113701	0.0981535
GATCCAGGCGGGAGCAG	s	T	1	MAGED2	Melanoma antigen family D, 2	393	24	1185	32	3.01527	0	0.0343782
GATCTTACTGGCCAAGC	s	Th	1	MAGED4B	Melanoma antigen family D, 4B	270	17	1068	42	3.95556	0	0.0343782
GATCACAATGAGCCAAG	s	Th	1	MAK10	MAK10 homolog, amino-acid N-acetyltransferase subunit, (S. cerevisiae)	0	0	44	21	#DIV/0!	0.000126201	0.0620318
GATCTACCCCGGACACG	s	Th	1	MAMDC2	MAM domain containing 2	630	105	955	22	1.51587	5.32994e-06	0.0388462
GATCAGCTGTAAAATGG	s	Th	1	MAML2	Mastermind-like 2 (Drosophila)	0	0	128	7	#DIV/0!	1.57133e-10	0.0343782
GATCCAGTTTGGGCACC	s	Th	4	MAN2C1	Mannosidase, alpha, class 2C, member 1	0	0	48	1	#DIV/0!	7.2386e-05	0.0602665
GATCCCACTAGCTGTGA	s	T	1	MANBAL	Mannosidase, beta A, lysosomal-like	0	0	43	3	#DIV/0!	0.000248529	0.0696973
GATCACTTTCTGAAATT	s	Th	1	MAOA	Monoamine oxidase A	0	0	102	9	#DIV/0!	1.16666e-08	0.0343782
GATCCCAGCCGGGGAGG	s	Th	5	MAP1S	Microtubule-associated protein 1S	0	0	51	14	#DIV/0!	4.15955e-05	0.0512997
GATCTACTTGCCTCATT	s	T	1	MAP2K4	Mitogen-activated protein kinase kinase 4	53	9	141	3	2.66038	0.00064791	0.0817111
GATCAAAGCTGGACTGG	s	Th	1	MAP3K1	Mitogen-activated protein kinase kinase kinase 1	8	8	305	9	38.125	0	0.0343782
GATCCTGACAAGAGAGC	s	T	4	MAP3K5	Mitogen-activated protein kinase kinase kinase 5	0	0	35	8	#DIV/0!	0.000824106	0.096944
GATCCTGAGAACTTGGA	s	T	1	MAP4K4	Mitogen-activated protein kinase kinase kinase kinase 4	70	1	306	58	4.37143	2.72267e-11	0.0343782
GATCCCAACTGCCCCCC	s	T	1	MAP6	Microtubule-associated protein 6	141	24	280	88	1.98582	0.000270634	0.069476
GATCTGCCAGGCTGGGG	s	Th	1	MAPRE1	Microtubule-associated protein, RP/EB family, member 1	95	5	330	24	3.47368	1.8412e-10	0.0343782
GATCAAAAGGCAGGAGG	s	Th	1	MARCH4	Membrane-associated ring finger (C3HC4) 4	6	6	57	17	9.5	0.000226409	0.0630416
GATCTGTGTGGGTAGCC	s	Th	3	MARCH9	Membrane-associated ring finger (C3HC4) 9	17	7	248	6	14.5882	1.77636e-15	0.0343782
GATCCAATTCCTATTGC	s	T	1	MARCKS	Myristoylated alanine-rich protein kinase C substrate	0	0	72	4	#DIV/0!	2.24757e-06	0.0343782
GATCATAGTCTTAGGAG	s	Th	1	MARCKS	Myristoylated alanine-rich protein kinase C substrate	131	8	267	11	2.03817	0.000111364	0.0632403
GATCCCGGGGACATGAT	s	T	1	MARK3	MAP/microtubule affinity-regulating kinase 3	86	7	228	3	2.65116	1.24328e-05	0.0388462
GATCCGGGATGCCTTGC	s	T	4	MARS	Methionyl-tRNA synthetase	0	0	76	11	#DIV/0!	1.25613e-06	0.0343782
GATCCAGCCCTGAGCAT	s	T	2	MAST2	Microtubule associated serine/threonine kinase 2	35	6	124	21	3.54286	0.000138818	0.0602665
GATCCATGTAACTGCCT	s	T	3	MAT2A	Methionine adenosyltransferase II, alpha	0	0	54	4	#DIV/0!	4.2002e-05	0.043986
GATCCCAGTGAAGGGTT	s	T	1	MAX	MYC associated factor X	0	0	113	10	#DIV/0!	3.90076e-09	0.0343782
GATCTCGGTTGAAGTGT	s	Th	1	MCART1	Mitochondrial carrier triple repeat 1	0	0	34	4	#DIV/0!	0.000678084	0.096944
GATCCAGGCTGCTCTGA	s	T	1	MCM3	Minichromosome maintenance complex component 3	17	3	342	70	20.1176	0	0.0343782
GATCACTTTTGTCTGAT	s	Th	1	MCM7	Minichromosome maintenance complex component 7	0	0	49	9	#DIV/0!	7.2386e-05	0.0512997
GATCAGCTGAGCCTTCT	s	Th	4	MECP2	Methyl CpG binding protein 2 (Rett syndrome)	39	3	179	19	4.58974	1.18821e-07	0.0343782
GATCTGTGCAGGAGACC	s	Th	1	MECP2	Methyl CpG binding protein 2 (Rett syndrome)	3	3	46	10	15.3333	0.000556847	0.0920388
GATCCGCTACCTCACCC	s	T	1	MED11	Mediator complex subunit 11	8	2	124	6	15.5	5.17369e-08	0.0343782
GATCCTGCGGCAGCAGC	s	T	3	MED12	Mediator complex subunit 12	48	6	230	2	4.79167	4.72744e-09	0.0343782
GATCCTTCCGCCTCAGT	s	T	5	MED20	Mediator complex subunit 20	0	0	48	5	#DIV/0!	0.000137089	0.0602665
GATCCATGAGCAGCTCC	s	T	1	MED24	Mediator complex subunit 24	108	14	479	89	4.43519	2.22045e-16	0.0343782
GATCCGGGGACCAGGGG	s	T	3	METRN	Meteorin, glial cell differentiation regulator	408	7	3000	205	7.35294	0	0.0343782
GATCTGCTTCACCCAGC	s	T	1	MEX3B	Mex-3 homolog B (C. elegans)	3	3	43	10	14.3333	0.00112264	0.0961818
GATCAGACTTTTGTCTC	s	Th	1	MFAP3	Microfibrillar-associated protein 3	0	0	44	11	#DIV/0!	0.000126201	0.0620318
GATCCCAGGTGCGTGTG	s	T	3	MFGE8	Milk fat globule-EGF factor 8 protein	41	13	150	17	3.65854	2.35321e-05	0.0388462
GATCACGAACAATAGCT	s	Th	1	MFSD1	Major facilitator superfamily domain containing 1	0	0	66	2	#DIV/0!	4.60262e-06	0.0343782
GATCTACAAATGGGAAG	s	T	1	MGC14327	Hypothetical protein MGC14327	15	2	91	11	6.06667	7.35915e-05	0.0503822
GATCACCTGGGGTTGGG	s	T	3	MGC15523	Hypothetical protein MGC15523	0	0	106	15	#DIV/0!	1.23182e-08	0.0343782
GATCCACCAGCAGAGGC	s	T	1	MGC15523	Hypothetical protein MGC15523	70	4	165	2	2.35714	0.000638846	0.0930152
GATCCAAGTTGCAGTGT	s	T	1	MGC16121	Hypothetical protein MGC16121	0	0	59	16	#DIV/0!	2.33168e-05	0.0406889
GATCTTGTAGTCAACCC	s	Th	3	MGC21881	Hypothetical locus MGC21881	2	2	48	2	24	0.000320249	0.0718638
GATCCTCAGTGGTAAGG	s	T	4	MGC33556	Hypothetical LOC339541	2	2	54	7	27	0.000191644	0.0600848
GATCCGACGGGGTTTGG	s	T	1	MGC33846	Hypothetical protein MGC33846	209	15	401	39	1.91866	2.90957e-05	0.0435195
GATCCGTGCTCCGACAA	s	T	5	MGST1	Microsomal glutathione S-transferase 1	0	0	67	28	#DIV/0!	7.21998e-06	0.0343782
GATCACTTCCTGACCCG	s	Th	1	MIB2	Mindbomb homolog 2 (Drosophila)	72	15	238	17	3.30556	9.14088e-08	0.0343782
GATCGGCAGGCTGAGGA	s	T	1	MICAL1	Microtubule associated monoxygenase, calponin and LIM domain containing 1	80	7	214	22	2.675	1.96772e-05	0.0406889
GATCGGCGGCGCGCAGA	s	Th	1	MIF	Macrophage migration inhibitory factor (glycosylation-inhibiting factor)	1009	27	2093	11	2.07433	0	0.0343782
GATCAGGGCTTCCTCAC	s	Th	1	MIF4GD	MIF4G domain containing	23	9	97	12	4.21739	0.000199261	0.0610295
GATCGCTTCCTTGTGAG	s	Th	4	MKI67	Antigen identified by monoclonal antibody Ki-67	0	0	36	6	#DIV/0!	0.000678084	0.096944
GATCTGTTTCTGGGGCC	s	Th	1	MKKS	McKusick-Kaufman syndrome	14	1	72	15	5.14286	0.000676135	0.092717
GATCCACCGCCACACTG	s	T	5	MLC1	Megalencephalic leukoencephalopathy with subcortical cysts 1	0	0	41	3	#DIV/0!	0.000451822	0.0725022
GATCTGTTTGGCCTGAC	s	Th	2	MLL3	Myeloid/lymphoid or mixed-lineage leukemia 3	2	2	64	7	32	2.05542e-05	0.043986
GATCCCATTGGGGGTTG	s	Th	3	MLL5	Myeloid/lymphoid or mixed-lineage leukemia 5 (trithorax homolog, Drosophila)	0	0	97	7	#DIV/0!	2.00256e-08	0.0343782
GATCCCCAAGGCACTTG	s	Th	1	MMP15	Matrix metallopeptidase 15 (membrane-inserted)	2	2	103	26	51.5	3.06864e-08	0.0343782
GATCCTGGCTTCCCCAA	s	T	1	MMP2	Matrix metallopeptidase 2 (gelatinase A, 72kDa gelatinase, 72kDa type IV collagenase)	2	2	184	5	92	3.54383e-13	0.0343782
GATCCAAGCAGGGGGAT	s	T	1	MMP28	Matrix metallopeptidase 28	83	0	208	21	2.50602	7.66228e-05	0.0505712
GATCCGCAAGTTGTGGA	s	T	1	MND1	Meiotic nuclear divisions 1 homolog (S. cerevisiae)	0	0	59	13	#DIV/0!	2.33168e-05	0.0406889
GATCTGGACTTTAATCT	s	Th	3	MOV10	Mov10, Moloney leukemia virus 10, homolog (mouse)	0	0	54	6	#DIV/0!	2.39413e-05	0.043986
GATCTCCTTGGCCAGCA	s	T	1	MPND	MPN domain containing	0	0	39	16	#DIV/0!	0.000451822	0.0725022
GATCCTACTGCCTCATC	s	Th	5	MPV17L	MPV17 mitochondrial membrane protein-like	0	0	48	5	#DIV/0!	7.2386e-05	0.0602665
GATCGTGCGGGCAGGCC	s	Th	1	MRPL11	Mitochondrial ribosomal protein L11	12	9	133	9	11.0833	1.34537e-08	0.0343782
GATCAAGGCGGCCCTGG	s	Th	3	MRPL12	Mitochondrial ribosomal protein L12	106	9	228	24	2.15094	0.000157147	0.0693402
GATCTGGCCATCTACGA	s	Th	2	MRPL20	Mitochondrial ribosomal protein L20	139	6	361	8	2.59712	3.28306e-08	0.0343782
GATCCCCAGGAGGCCTG	s	T	1	MRPL28	Mitochondrial ribosomal protein L28	30	29	110	112	3.66667	0.000200625	0.0621346
GATCCATTCGAGGTGCA	s	T	1	MRPL36	Mitochondrial ribosomal protein L36	60	14	162	20	2.7	0.000177635	0.0630416
GATCCCGGCTGTTGGCC	s	T	1	MRPL4	Mitochondrial ribosomal protein L4	61	4	217	33	3.55738	4.86624e-07	0.0343782
GATCATCACCACCCTGA	s	Th	4	MRPL45	Mitochondrial ribosomal protein L45	0	0	44	11	#DIV/0!	0.000126201	0.0620318
GATCCCCATGGCGCTTG	s	Th	1	MRPL46	Mitochondrial ribosomal protein L46	0	0	90	1	#DIV/0!	5.90933e-08	0.0343782
GATCCGTGGCAGGGCTG	s	T	1	MRPS21	Mitochondrial ribosomal protein S21	159	6	382	28	2.40252	2.31242e-07	0.0343782
GATCGAGCGAGTGAACA	s	Th	1	MRPS26	Mitochondrial ribosomal protein S26	39	6	162	21	4.15385	1.1976e-06	0.0343782
GATCTGCCTGCCCCCTG	s	T	3	MST1	Macrophage stimulating 1 (hepatocyte growth factor-like)	0	0	59	1	#DIV/0!	2.33168e-05	0.0406889
GATCGGGAACTCCTGCT	s	Th	1	MT1X	Metallothionein 1X	67	5	656	11	9.79104	0	0.0343782
GATCTCAACTGCTCCTG	s	Th	1	MT2A	Metallothionein 2A	0	0	95	16	#DIV/0!	3.4391e-08	0.0343782
GATCCCAACTGCTCCTG	s	Th	1	MT2A	Metallothionein 2A	756	8	4394	156	5.81217	0	0.0343782
GATCGTGCGGCCGCGGC	s	Th	1	MTA1	Metastasis associated 1	0	0	235	96	#DIV/0!	0	0.0343782
GATCCGCAAGCTGCTCT	s	T	1	MTA1	Metastasis associated 1	0	0	48	1	#DIV/0!	0.000137089	0.0602665
GATCCTCCAGGAGCGGC	s	T	1	MTIF3	Mitochondrial translational initiation factor 3	91	25	223	2	2.45055	8.05289e-05	0.0444611
GATCCAAAATGGGAGGC	s	Th	1	MTMR2	Myotubularin related protein 2	28	2	100	23	3.57143	0.000279637	0.0718638
GATCTGTACCTGAGAGG	s	Th	1	MVK	Mevalonate kinase (mevalonic aciduria)	3	3	71	16	23.6667	6.90253e-06	0.0388462
GATCCTGGACCAGTCAG	s	T	2	MVP	Major vault protein	30	1	117	10	3.9	7.5978e-05	0.0510659
GATCCTGTACAGCCAGT	s	Th	1	MYL6	Myosin, light chain 6, alkali, smooth muscle and non-muscle	878	26	1506	45	1.71526	5.57554e-13	0.0343782
GATCATACTTTGAGTGA	s	Th	1	MYNN	Myoneurin	0	0	56	6	#DIV/0!	2.39413e-05	0.043986
GATCCTGGGGTGGGGGT	s	T	5	MYO1F	Myosin IF	0	0	136	14	#DIV/0!	1.25182e-10	0.0343782
GATCTGTGTCACACCCA	s	Th	1	MYST1	MYST histone acetyltransferase 1	25	4	110	6	4.4	3.03587e-05	0.0503822
GATCCAGACAGTCTGAG	s	T	4	MYST4	MYST histone acetyltransferase (monocytic leukemia) 4	8	8	74	9	9.25	0.000133863	0.0503822
GATCAAGAACCCATCAG	s	Th	4	MYT1L	Myelin transcription factor 1-like	0	0	103	23	#DIV/0!	6.79992e-09	0.0343782
GATCTGCAGTGGCTGTT	s	T	1	N4BP1	Nedd4 binding protein 1	0	0	115	23	#DIV/0!	3.90076e-09	0.0343782
GATCCCTTCACTGGCCC	s	T	1	NAB2	NGFI-A binding protein 2 (EGR1 binding protein 2)	10	10	72	8	7.2	0.000133863	0.0606306
GATCGAAGATTTATCCC	s	Th	1	NACA	Nascent polypeptide-associated complex alpha subunit	166	10	300	18	1.80723	0.000410765	0.0962785
GATCCAGGCTCAGAACT	s	T	1	NAGK	N-acetylglucosamine kinase	71	2	204	16	2.87324	2.05512e-05	0.0388462
GATCTGATGTGTTTGAG	s	T	4	NAGLU	N-acetylglucosaminidase, alpha- (Sanfilippo disease IIIB)	0	0	63	2	#DIV/0!	1.29653e-05	0.0388462
GATCATCCAGCAGTGTC	s	T	4	NAIP	NLR family, apoptosis inhibitory protein	0	0	35	8	#DIV/0!	0.000824106	0.096944
GATCCCATCTTTAGCGC	s	Th	4	NAPE-PLD	N-acyl-phosphatidylethanolamine-hydrolyzing phospholipase D	0	0	64	3	#DIV/0!	4.60262e-06	0.0388462
GATCGTCTGCTGAATAC	s	Th	1	NASP	Nuclear autoantigenic sperm protein (histone-binding)	22	5	105	15	4.77273	3.23402e-05	0.0503822
GATCTGGCTGGAGCCCA	s	Th	1	NAV1	Neuron navigator 1	0	0	66	2	#DIV/0!	4.60262e-06	0.0343782
GATCATACACACTGTAC	s	Th	1	NBEAL2	Neurobeachin-like 2	0	0	48	5	#DIV/0!	7.2386e-05	0.0602665
GATCAAAGAAGGAAAGA	s	Th	4	NBPF1	Neuroblastoma breakpoint family, member 1	8	4	59	14	7.375	0.000709838	0.0919382
GATCACCTGGCCCGGGA	s	T	3	NCAM1	Neural cell adhesion molecule 1	138	19	271	1	1.96377	0.00047058	0.0713382
GATCCTCTTGGCAGGTG	s	T	5	NCAN	Neurocan	0	0	61	8	#DIV/0!	1.29653e-05	0.0388462
GATCACTTCCCGCAGTC	s	Th	1	NCAPD3	Non-SMC condensin II complex, subunit D3	14	14	72	67	5.14286	0.000676135	0.092717
GATCAAGCGGGGGGCGC	s	Th	1	NCF1	Neutrophil cytosolic factor 1, (chronic granulomatous disease, autosomal 1)	0	0	92	7	#DIV/0!	5.90933e-08	0.0343782
GATCTGGTTCGGCTGCT	s	Th	1	NCF4	Neutrophil cytosolic factor 4, 40kDa	2	2	51	4	25.5	0.000184457	0.0693882
GATCCCCTAAACTTGCA	s	T	1	NCK2	NCK adaptor protein 2	15	4	106	25	7.06667	8.61262e-06	0.0343782
GATCACAGTCTTGAGGT	s	Th	1	NCOA5	Nuclear receptor coactivator 5	47	17	125	10	2.65957	0.00084547	0.0991946
GATCACCCTGACAGTGG	s	Th	1	NCSTN	Nicastrin	106	3	443	9	4.17925	6.66134e-16	0.0343782
GATCGGGGCAAGAGAGG	s	Th	1	NDRG1	N-myc downstream regulated gene 1	323	32	589	1	1.82353	8.56791e-07	0.0343782
GATCCTGGATGCCACGA	s	T	1	NDUFA12L	NDUFA12-like	50	15	160	30	3.2	3.96505e-05	0.0435195
GATCCCTGCCCCCCCCC	s	Th	1	NDUFA13	NADH dehydrogenase (ubiquinone) 1 alpha subcomplex, 13	95	99	213	26	2.24211	0.000207472	0.0693882
GATCCTTCCCAGTGGAC	s	T	1	NDUFB2	NADH dehydrogenase (ubiquinone) 1 beta subcomplex, 2, 8kDa	505	30	863	52	1.70891	1.63792e-07	0.0343782
GATCGCGACGGCTGGTT	s	T	1	NDUFC2	NADH dehydrogenase (ubiquinone) 1, subcomplex unknown, 2, 14.5kDa	229	14	563	0	2.45852	1.30895e-10	0.0343782
GATCCGCCACTTTCGGC	s	Th	1	NDUFV1	NADH dehydrogenase (ubiquinone) flavoprotein 1, 51kDa	428	6	643	27	1.50234	0.000234112	0.0743581
GATCCTGGGCATGCGCT	s	Th	1	NEK2	NIMA (never in mitosis gene a)-related kinase 2	0	0	39	0	#DIV/0!	0.000386126	0.0725022
GATCCTGAAGAGAGCTG	s	T	1	NEO1	Neogenin homolog 1 (chicken)	8	2	54	1	6.75	0.00213476	0.0943182
GATCCCCAGTGGGATGG	s	T	5	NES	Nestin	0	0	56	5	#DIV/0!	4.2002e-05	0.043986
GATCAGCTGAAGCAGGA	s	T	1	NF2	Neurofibromin 2 (bilateral acoustic neuroma)	0	0	61	3	#DIV/0!	1.29653e-05	0.0388462
GATCCGAGTCCAGGCTG	s	T	2	NFASC	Neurofascin homolog (chicken)	0	0	52	1	#DIV/0!	7.58015e-05	0.0503822
GATCGGATGGAGACAGA	s	Th	5	NFAT5	Nuclear factor of activated T-cells 5, tonicity-responsive	0	0	46	10	#DIV/0!	0.000126201	0.0620318
GATCTGCTGGTGGACAG	s	Th	1	NFKB2	Nuclear factor of kappa light polypeptide gene enhancer in B-cells 2 (p49/p100)	5	1	61	16	12.2	0.000132225	0.0609844
GATCGGAGGCTTGTCAG	s	Th	1	NGFR	Nerve growth factor receptor (TNFR superfamily, member 16)	0	0	34	4	#DIV/0!	0.000678084	0.096944
GATCCACCTGTCCTGAC	s	T	1	NHLH1	Nescient helix loop helix 1	0	0	74	28	#DIV/0!	2.24757e-06	0.0343782
GATCAACCGTGGTGGGG	s	Th	4	NICN1	Nicolin 1	0	0	57	4	#DIV/0!	1.38001e-05	0.0406889
GATCGGCGTGGGGGTGC	s	T	1	NINJ1	Ninjurin 1	129	8	371	9	2.87597	5.1147e-09	0.0343782
GATCTCATCCAGCCCAC	s	Th	1	NIP30	NEFA-interacting nuclear protein NIP30	39	6	148	2	3.79487	1.142e-05	0.0388462
GATCATGTTTGTGTTGC	s	T	5	NIPA1	Non imprinted in Prader-Willi/Angelman syndrome 1	0	0	59	10	#DIV/0!	2.33168e-05	0.0406889
GATCACCGTGAATCCGG	s	T	1	NIPA2	Non imprinted in Prader-Willi/Angelman syndrome 2	32	0	128	29	4	3.97642e-05	0.0435195
GATCCCCAGGTAATCTG	s	T	1	NIPBL	Nipped-B homolog (Drosophila)	18	18	162	6	9	7.52724e-09	0.0343782
GATCCTGCTCCTGTGGC	s	Th	2	NKAIN4	Na+/K+ transporting ATPase interacting 4	78	6	518	89	6.64103	0	0.0343782
GATCTGCCGCTCCCTCC	s	Th	1	NKIRAS2	NFKB inhibitor interacting Ras-like 2	189	1	338	30	1.78836	0.000327374	0.0743581
GATCTGGTTCCAGAACC	s	Th	1	NKX2-1	NK2 homeobox 1	28	4	154	8	5.5	1.42958e-07	0.0343782
GATCCTTTCCCCTGCCT	s	T	3	NLGN2	Neuroligin 2	176	0	527	6	2.99432	7.6783e-13	0.0343782
GATCTATGAATGACAGG	s	Th	1	NME1	Non-metastatic cells 1, protein (NM23A) expressed in	66	15	185	3	2.80303	1.76754e-05	0.0435195
GATCCAGCTGTGGTTCC	s	T	1	NME4	Non-metastatic cells 4, protein expressed in	159	23	668	74	4.20126	0	0.0343782
GATCATGCTTGTGTGAG	s	T	1	NOLA3	Nucleolar protein family A, member 3 (H/ACA small nucleolar RNPs)	0	0	67	6	#DIV/0!	7.21998e-06	0.0343782
GATCCCGTCGCTGACGC	s	T	1	NOSIP	Nitric oxide synthase interacting protein	91	15	191	1	2.0989	0.00142637	0.0983418
GATCCCTTCCCCTTCCA	s	Th	4	NOVA1	Neuro-oncological ventral antigen 1	50	11	184	32	3.68	8.57123e-07	0.0343782
GATCCAGGGAACGGTTG	s	Th	3	NOVA1	Neuro-oncological ventral antigen 1	0	0	36	39	#DIV/0!	0.000678084	0.096944
GATCACGTGAGTCAATA	s	Th	1	NPB	Neuropeptide B	0	0	34	9	#DIV/0!	0.000678084	0.096944
GATCTCGCCTGGGGACC	s	Th	1	NPDC1	Neural proliferation, differentiation and control, 1	676	6	1122	32	1.65976	4.46861e-09	0.0343782
GATCCCCCCCCACCCAG	s	T	2	NPDC1	Neural proliferation, differentiation and control, 1	60	8	178	60	2.96667	3.26394e-05	0.0435195
GATCCTGGAGGAATGAA	s	T	1	NPFF	Neuropeptide FF-amide peptide precursor	0	0	71	6	#DIV/0!	4.02592e-06	0.0343782
GATCTCTGGCAGTGGAG	s	Th	1	NPM1	Nucleophosmin (nucleolar phosphoprotein B23, numatrin)	148	10	463	49	3.12838	1.23523e-12	0.0343782
GATCCCCGTCCGTGCGC	s	T	1	NPW	Neuropeptide W	0	0	54	12	#DIV/0!	4.2002e-05	0.043986
GATCACGGGAACTTGAG	s	Th	1	NRP2	Neuropilin 2	3	3	46	3	15.3333	0.000556847	0.0920388
GATCCGCCATCAGTACC	s	T	1	NSMCE4A	Non-SMC element 4 homolog A (S. cerevisiae)	5	1	82	24	16.4	1.27976e-05	0.0343782
GATCCTTCCTGCAGTGG	s	T	1	NSUN5C	NOL1/NOP2/Sun domain family, member 5C	144	7	325	46	2.25694	7.4529e-06	0.0343782
GATCCGCATCATCAACA	s	T	1	NT5DC2	5'-nucleotidase domain containing 2	38	20	271	38	7.13158	9.10827e-13	0.0343782
GATCCCACTGGATGGGT	s	T	1	NTRK2	Neurotrophic tyrosine kinase, receptor, type 2	274	9	462	62	1.68613	0.000194459	0.062894
GATCCCAGCCCGATTCT	s	T	1	NTRK3	Neurotrophic tyrosine kinase, receptor, type 3	2	2	156	15	78	3.36935e-11	0.0343782
GATCTGCGCCGGGTCGC	s	T	4	NUDT14	Nudix (nucleoside diphosphate linked moiety X)-type motif 14	0	0	115	5	#DIV/0!	3.90076e-09	0.0343782
GATCCTGAGGTGACCTT	s	T	2	NUDT22	Nudix (nucleoside diphosphate linked moiety X)-type motif 22	2	2	100	24	50	1.81102e-07	0.0343782
GATCCCCTGGGGTATTT	s	T	1	NUFIP2	Nuclear fragile X mental retardation protein interacting protein 2	7	6	72	0	10.2857	4.01493e-05	0.0503822
GATCTGGACTGTCCTGG	s	Th	1	NUP37	Nucleoporin 37kDa	0	0	41	2	#DIV/0!	0.000220483	0.0725022
GATCTCATTGACAACCT	s	Th	1	NUP85	Nucleoporin 85kDa	0	0	115	6	#DIV/0!	1.3499e-09	0.0343782
GATCACCTGGATTTTCA	s	Th	1	NUPL2	Nucleoporin like 2	11	4	143	9	13	2.79095e-09	0.0343782
GATCGTGGACCATGTGA	s	Th	1	NXPH4	Neurexophilin 4	3	0	43	0	14.3333	0.00096987	0.0961818
GATCCCCGTCTCAAGTG	s	Th	1	OBSL1	Obscurin-like 1	5	1	51	12	10.2	0.000663967	0.0931773
GATCACTAAGCAAAGCT	s	Th	1	OCRL	Oculocerebrorenal syndrome of Lowe	19	4	139	4	7.31579	4.83199e-08	0.0343782
GATCGCTCTGAATTTGG	s	Th	1	OGFR	Opioid growth factor receptor	28	2	92	13	3.28571	0.00106575	0.0977428
GATCTCAACAAAGGGTC	s	Th	1	OGT	O-linked N-acetylglucosamine (GlcNAc) transferase (UDP-N-acetylglucosamine:polypeptide-N-acetylglucosaminyl transferase)	34	36	120	1	3.52941	8.76326e-05	0.0613819
GATCCTCCCTTTGCCAT	s	T	4	OLFM1	Olfactomedin 1	0	0	48	14	#DIV/0!	0.000137089	0.0602665
GATCCCAGCTGCGGTGG	s	Th	1	OLIG1	Oligodendrocyte transcription factor 1	753	23	2678	78	3.55644	0	0.0343782
GATCCTGCCACTACACT	s	T	4	OPA3	Optic atrophy 3 (autosomal recessive, with chorea and spastic paraplegia)	7	6	56	5	8	0.000701129	0.0943182
GATCCTGAGCCTGACCA	s	T	1	ORC3L	Origin recognition complex, subunit 3-like (yeast)	0	0	76	15	#DIV/0!	1.25613e-06	0.0343782
GATCCCAATCAGATTCC	s	T	1	OSBP	Oxysterol binding protein	40	5	117	12	2.925	0.000694067	0.0929626
GATCACTTGTGCTTAGC	s	Th	1	OSBPL3	Oxysterol binding protein-like 3	0	0	34	1	#DIV/0!	0.000678084	0.096944
GATCCTGGAATTTTCTC	s	T	3	OSM	Oncostatin M	0	0	89	6	#DIV/0!	2.20516e-07	0.0343782
GATCCTTCAGGACTGGG	s	T	1	OTP	Orthopedia homeobox	0	0	65	8	#DIV/0!	7.21998e-06	0.0343782
GATCCACGCCATGGCAG	s	T	1	P2RY11	Purinergic receptor P2Y, G-protein coupled, 11	0	0	35	5	#DIV/0!	0.000824106	0.096944
GATCCTGTCAGGGTGTC	s	T	1	P4HB	Procollagen-proline, 2-oxoglutarate 4-dioxygenase (proline 4-hydroxylase), beta polypeptide	277	24	1032	62	3.72563	0	0.0343782
GATCACGGGAATGCTGC	s	Th	1	PABPC4	Poly(A) binding protein, cytoplasmic 4 (inducible form)	109	16	399	40	3.66055	4.16112e-13	0.0343782
GATCCGGGACAGTTTAC	s	T	4	PAK7	P21(CDKN1A)-activated kinase 7	13	4	67	6	5.15385	0.00114372	0.0926416
GATCTGCCTTGCCAACA	s	T	4	PCBP2	Poly(rC) binding protein 2	0	0	41	12	#DIV/0!	0.000451822	0.0725022
GATCAGAGCCGAGTACA	s	Th	1	PCDHB10	Protocadherin beta 10	0	0	54	6	#DIV/0!	2.39413e-05	0.043986
GATCTGCCTGACTCTAA	s	Th	5	PCDHB12	Protocadherin beta 12	0	0	34	1	#DIV/0!	0.000678084	0.096944
GATCTACTGAGGCTAGT	s	T	1	PCDHB2	Protocadherin beta 2	0	0	74	32	#DIV/0!	2.24757e-06	0.0343782
GATCTGCCCGCGGCGGC	s	Th	1	PCDHGC3	Protocadherin gamma subfamily C, 3	965	45	3385	18	3.50777	0	0.0343782
GATCTGAGAGGAGTCGG	s	Th	1	PCGF2	Polycomb group ring finger 2	0	0	49	6	#DIV/0!	7.2386e-05	0.0512997
GATCTCTCTCATCCCCA	s	Th	4	PCNXL3	Pecanex-like 3 (Drosophila)	11	2	113	13	10.2727	3.10083e-07	0.0343782
GATCCTACTATCATTGT	s	T	1	PDE4B	Phosphodiesterase 4B, cAMP-specific (phosphodiesterase E4 dunce homolog, Drosophila)	0	0	48	5	#DIV/0!	0.000137089	0.0602665
GATCAGGAACTACTTCA	s	Th	1	PDE4D	Phosphodiesterase 4D, cAMP-specific (phosphodiesterase E3 dunce homolog, Drosophila)	0	0	39	13	#DIV/0!	0.000386126	0.0725022
GATCGCTACGAGGAGCT	s	Th	4	PDE9A	Phosphodiesterase 9A	0	0	67	10	#DIV/0!	2.66252e-06	0.0343782
GATCGGCCAGTTTTCGG	s	Th	5	PDGFRA	Platelet-derived growth factor receptor, alpha polypeptide	8	2	689	29	86.125	0	0.0343782
GATCTCTAAAGCAGTAG	s	Th	1	PDIA3	Protein disulfide isomerase family A, member 3	59	5	144	2	2.44068	0.000826136	0.0971807
GATCTGGAGCATTTGAG	s	Th	2	PDIA4	Protein disulfide isomerase family A, member 4	0	0	43	46	#DIV/0!	0.000220483	0.0696973
GATCCAGGGTCCCCCAG	s	T	1	PDIA4	Protein disulfide isomerase family A, member 4	2	2	46	12	23	0.000621641	0.0920388
GATCAGGAAGTTTCTTC	s	Th	1	PDIK1L	PDLIM1 interacting kinase 1 like	3	0	49	7	16.3333	0.000320249	0.0693882
GATCTGGCTTCCATTTG	s	Th	1	PDLIM5	PDZ and LIM domain 5	39	6	138	21	3.53846	4.27643e-05	0.0503822
GATCTATTGACGGGCCT	s	T	1	PDRG1	P53 and DNA damage regulated 1	17	1	186	29	10.9412	8.42639e-11	0.0343782
GATCCAGCCAGGCACCC	s	T	1	PDXDC1	Pyridoxal-dependent decarboxylase domain containing 1	0	0	39	1	#DIV/0!	0.000451822	0.0725022
GATCGAGGTTGCAGTGA	s	Th	5	PDXK	Pyridoxal (pyridoxine, vitamin B6) kinase	0	0	77	2	#DIV/0!	5.183e-07	0.0343782
GATCCTGAGTCCAGAAT	s	T	3	PEBP1	Phosphatidylethanolamine binding protein 1	12	2	113	16	9.41667	9.45635e-07	0.0343782
GATCGTGCTACTGCAGT	s	T	3	PECR	Peroxisomal trans-2-enoyl-CoA reductase	0	0	180	65	#DIV/0!	1.33227e-13	0.0343782
GATCAAGAAAATCATCC	s	Th	2	PELI1	Pellino homolog 1 (Drosophila)	0	0	52	12	#DIV/0!	4.15955e-05	0.0503822
GATCCAGGGGCTGCCTC	s	T	4	PER1	Period homolog 1 (Drosophila)	56	1	152	7	2.71429	0.000339024	0.0695388
GATCCCCCAACACTGAC	s	T	3	PERQ1	PERQ amino acid rich, with GYF domain 1	0	0	71	13	#DIV/0!	4.02592e-06	0.0343782
GATCAAGCTGGCCTCGG	s	Th	1	PERQ1	PERQ amino acid rich, with GYF domain 1	77	4	374	7	4.85714	4.66294e-15	0.0343782
GATCAGGACTGGCAGGG	s	Th	1	PEX12	Peroxisomal biogenesis factor 12	5	5	84	2	16.8	3.07812e-06	0.0343782
GATCCTCTTCCTGCTCC	s	T	1	PEX16	Peroxisomal biogenesis factor 16	13	9	72	11	5.53846	0.000391339	0.0702513
GATCCTCCTCCCAGCTC	s	T	1	PFKFB3	6-phosphofructo-2-kinase/fructose-2,6-biphosphatase 3	71	18	303	16	4.26761	1.01659e-10	0.0343782
GATCCACCCACCACCCC	s	T	4	PGD	Phosphogluconate dehydrogenase	0	0	43	44	#DIV/0!	0.000248529	0.0696973
GATCCAGACCAGCGTCT	s	T	1	PGPEP1	Pyroglutamyl-peptidase I	60	2	171	37	2.85	7.67809e-05	0.0508427
GATCGAGCTGCGCAAGC	s	Th	1	PHB	Prohibitin	37	1	144	15	3.89189	8.21389e-06	0.0388462
GATCGCTACCCACCTTC	s	Th	3	PHF12	PHD finger protein 12	0	0	44	41	#DIV/0!	0.000126201	0.0620318
GATCGCAGCTCCAAGAG	s	Th	4	PHF14	PHD finger protein 14	6	6	100	0	16.6667	2.11086e-07	0.0343782
GATCTGGATTTCTATAG	s	Th	1	PHF15	PHD finger protein 15	0	0	39	4	#DIV/0!	0.000386126	0.0725022
GATCCATGCTGTGCTGA	s	Th	4	PHF8	PHD finger protein 8	0	0	36	1	#DIV/0!	0.000678084	0.096944
GATCCAGTTGTCACTGA	s	Th	3	PHIP	Pleckstrin homology domain interacting protein	0	0	130	5	#DIV/0!	9.18552e-11	0.0343782
GATCTGGGTGTGCTCTA	s	Th	1	PHLDA1	Pleckstrin homology-like domain, family A, member 1	0	0	72	78	#DIV/0!	1.54173e-06	0.0343782
GATCCACCATCAAGGCC	s	T	1	PHPT1	Phosphohistidine phosphatase 1	0	0	58	14	#DIV/0!	2.33168e-05	0.0406889
GATCCGGTGCGCCATGT	s	T	1	PI3	Peptidase inhibitor 3, skin-derived (SKALP)	0	0	80	26	#DIV/0!	7.02724e-07	0.0343782
GATCCTGTGGTTGGCCA	s	T	1	PI4KB	Phosphatidylinositol 4-kinase, catalytic, beta	221	3	459	36	2.07692	9.2767e-07	0.0343782
GATCCATCTGCTGGTGG	s	T	1	PIGQ	Phosphatidylinositol glycan anchor biosynthesis, class Q	0	0	61	12	#DIV/0!	1.29653e-05	0.0388462
GATCAGCATGTAAAGTG	s	Th	1	PIGS	Phosphatidylinositol glycan anchor biosynthesis, class S	0	0	39	16	#DIV/0!	0.000386126	0.0725022
GATCAGGGAGGCAGCAG	s	Th	1	PILRB	Paired immunoglobin-like type 2 receptor beta	152	6	567	2	3.73026	0	0.0343782
GATCATAAAACGGACCA	s	T	1	PIP5K3	Phosphatidylinositol-3-phosphate/phosphatidylinositol 5-kinase, type III	38	7	132	5	3.47368	0.000114259	0.0505712
GATCAGTTAGTGTCAAG	s	Th	1	PJA2	Praja 2, RING-H2 motif containing	8	8	54	1	6.75	0.00119423	0.0943182
GATCAACGCCTCACTGA	s	Th	1	PKM2	Pyruvate kinase, muscle	705	55	1009	20	1.43121	3.89853e-05	0.0606306
GATCGCTGCTGTGTCAC	s	T	1	PLA2G2A	Phospholipase A2, group IIA (platelets, synovial fluid)	0	0	41	3	#DIV/0!	0.000451822	0.0725022
GATCCCGTTCCCACCCA	s	T	3	PLA2G4B	Phospholipase A2, group IVB (cytosolic)	0	0	84	4	#DIV/0!	3.93488e-07	0.0343782
GATCTTTCAGGAAAGAC	s	Th	1	PLAT	Plasminogen activator, tissue	0	0	52	1	#DIV/0!	4.15955e-05	0.0503822
GATCCGGGGGACCCCTT	s	T	2	PLAUR	Plasminogen activator, urokinase receptor	7	7	115	1	16.4286	7.52866e-08	0.0343782
GATCCGCCGGAGCCTGC	s	Th	1	PLCB3	Phospholipase C, beta 3 (phosphatidylinositol-specific)	9	9	69	5	7.66667	0.000147937	0.0699457
GATCCATGCTGAGGAGA	s	T	1	PLCE1	Phospholipase C, epsilon 1	2	2	78	2	39	5.79806e-06	0.0343782
GATCTCCTCCCCGAGGA	s	Th	1	PLOD3	Procollagen-lysine, 2-oxoglutarate 5-dioxygenase 3	41	11	121	4	2.95122	0.000360752	0.0741422
GATCAAGAACCCGCAGT	s	Th	4	PLXNA3	Plexin A3	0	0	38	9	#DIV/0!	0.000386126	0.0922803
GATCCTATGTCTGTCTG	s	T	3	PLXNB2	Plexin B2	22	1	82	9	3.72727	0.00198915	0.0992481
GATCCCCCTCCTTCCCC	s	T	1	PLXNB3	Plexin B3	53	15	297	138	5.60377	1.32827e-12	0.0343782
GATCTGGTTGGCATTTT	s	Th	1	PNN	Pinin, desmosome associated protein	6	0	69	5	11.5	4.51162e-05	0.0444611
GATCAGCTGGGTTTTGG	s	T	1	POGZ	Pogo transposable element with ZNF domain	58	14	215	10	3.7069	3.68783e-07	0.0343782
GATCCTGGAGTGGACCC	s	T	1	POLD2	Polymerase (DNA directed), delta 2, regulatory subunit 50kDa	78	15	332	13	4.25641	1.12321e-11	0.0343782
GATCAGTAAACCAGTGC	s	Th	1	POLDIP2	Polymerase (DNA-directed), delta interacting protein 2	114	10	269	62	2.35965	1.123e-05	0.0388462
GATCAGCTTGAAGAGGA	s	T	1	POLDIP3	Polymerase (DNA-directed), delta interacting protein 3	0	0	43	44	#DIV/0!	0.000248529	0.0696973
GATCGGTCGGTAGCCCA	s	Th	1	POLR1B	Polymerase (RNA) I polypeptide B, 128kDa	28	8	118	7	4.21429	2.79767e-05	0.043986
GATCCCCATCATCATTC	s	T	1	POLR2F	Polymerase (RNA) II (DNA directed) polypeptide F	46	9	408	54	8.86957	0	0.0343782
GATCCTCTGCTCATTGC	s	Th	1	POLR2F	Polymerase (RNA) II (DNA directed) polypeptide F	0	0	59	12	#DIV/0!	1.38001e-05	0.0406889
GATCCGCTTAAAGATTG	s	T	1	POLR2G	Polymerase (RNA) II (DNA directed) polypeptide G	13	1	72	19	5.53846	0.000391339	0.0702513
GATCATCATCCGAGTGC	s	T	1	POLR2J	Polymerase (RNA) II (DNA directed) polypeptide J, 13.3kDa	58	17	199	5	3.43103	2.299e-06	0.0343782
GATCTTCCTGGACAGGA	s	T	1	POMZP3	POM (POM121 homolog, rat) and ZP3 fusion	7	4	82	2	11.7143	1.27976e-05	0.0388462
GATCGTGTTGGCGGTTG	s	T	1	POMZP3	POM (POM121 homolog, rat) and ZP3 fusion	8	5	72	22	9	0.000133863	0.0503822
GATCCTTCCTCGGGGGA	s	T	1	PON2	Paraoxonase 2	646	47	1708	194	2.64396	0	0.0343782
GATCCGCAACAACTCAG	s	T	1	POP7	Processing of precursor 7, ribonuclease P/MRP subunit (S. cerevisiae)	20	7	89	9	4.45	0.000319838	0.0704762
GATCCGCGTCTGGTTCT	s	T	1	POU2F2	POU class 2 homeobox 2	13	1	72	11	5.53846	0.000391339	0.0702513
GATCTCCTCTTCCACCT	s	Th	1	POU6F1	POU class 6 homeobox 1	0	0	84	8	#DIV/0!	1.74778e-07	0.0343782
GATCGAGGTGGAGAAGC	s	Th	1	PPIB	Peptidylprolyl isomerase B (cyclophilin B)	134	8	559	37	4.17164	0	0.0343782
GATCATCGCCGACTGTG	s	T	1	PPIE	Peptidylprolyl isomerase E (cyclophilin E)	18	1	78	13	4.33333	0.00145898	0.0926727
GATCATGAATCAAGCCC	s	T	1	PPIG	Peptidylprolyl isomerase G (cyclophilin G)	22	4	89	2	4.04545	0.000750694	0.0921431
GATCAGTTTGGGGTGCA	s	Th	1	PPIL5	Peptidylprolyl isomerase (cyclophilin)-like 5	0	0	62	2	#DIV/0!	7.965e-06	0.0388462
GATCCCAGGCAGAGGGA	s	Th	4	PPM1F	Protein phosphatase 1F (PP2C domain containing)	0	0	46	0	#DIV/0!	0.000126201	0.0620318
GATCCTGGGTGCCTCAG	s	T	5	PPM1F	Protein phosphatase 1F (PP2C domain containing)	0	0	43	5	#DIV/0!	0.000248529	0.0696973
GATCAGTGCCTGGCACC	s	Th	2	PPM1G	Protein phosphatase 1G (formerly 2C), magnesium-dependent, gamma isoform	177	5	387	13	2.18644	8.02336e-07	0.0343782
GATCCGGGGCATGCAGA	s	T	1	PPP1R14B	Protein phosphatase 1, regulatory (inhibitor) subunit 14B	169	17	592	29	3.50296	0	0.0343782
GATCTCATCCAAGCAAA	s	Th	3	PPP2R1B	Protein phosphatase 2 (formerly 2A), regulatory subunit A, beta isoform	0	0	44	8	#DIV/0!	0.000126201	0.0620318
GATCTCCCTGCTCAGGG	s	T	2	PPP2R3B	Protein phosphatase 2 (formerly 2A), regulatory subunit B'', beta	0	0	56	2	#DIV/0!	4.2002e-05	0.043986
GATCTGCCGTGCCCACC	s	T	1	PPP4C	Protein phosphatase 4 (formerly X), catalytic subunit	56	4	386	24	6.89286	0	0.0343782
GATCCCCAGTGTTTGGA	s	T	1	PPRC1	Peroxisome proliferator-activated receptor gamma, coactivator-related 1	0	0	41	6	#DIV/0!	0.000451822	0.0725022
GATCAGTGCCAGAACTG	s	Th	4	PPT1	Palmitoyl-protein thioesterase 1 (ceroid-lipofuscinosis, neuronal 1, infantile)	0	0	59	1	#DIV/0!	1.38001e-05	0.0406889
GATCCAGCTGGAAAGCT	s	T	1	PRDX4	Peroxiredoxin 4	28	7	154	28	5.5	4.94159e-07	0.0343782
GATCCTGCAAACCCAGA	s	T	1	PRELP	Proline/arginine-rich end leucine-rich repeat protein	3	0	85	2	28.3333	1.82085e-06	0.0343782
GATCCCCAGACCTCACT	s	T	1	PRKAG1	Protein kinase, AMP-activated, gamma 1 non-catalytic subunit	63	12	180	54	2.85714	4.02064e-05	0.043986
GATCTTCCATGGTGGAC	s	T	1	PRKX	Protein kinase, X-linked	0	0	84	37	#DIV/0!	3.93488e-07	0.0343782
GATCGGGGACATCCTTA	s	Th	1	PRPF6	PRP6 pre-mRNA processing factor 6 homolog (S. cerevisiae)	31	4	134	20	4.32258	6.30501e-06	0.0388462
GATCGGGAGGACCTGTA	s	Th	1	PRPF8	PRP8 pre-mRNA processing factor 8 homolog (S. cerevisiae)	236	9	631	31	2.67373	4.86278e-14	0.0343782
GATCAAATTGTGTCTCC	s	Th	1	PSCD2	Pleckstrin homology, Sec7 and coiled-coil domains 2 (cytohesin-2)	0	0	157	4	#DIV/0!	1.26432e-12	0.0343782
GATCCACACGCTCACCT	s	T	4	PSD2	Pleckstrin and Sec7 domain containing 2	0	0	35	12	#DIV/0!	0.000824106	0.096944
GATCTGGAATTTTGGTG	s	T	1	PSEN1	Presenilin 1 (Alzheimer disease 3)	17	16	80	11	4.70588	0.000359438	0.0736103
GATCCGTGATGCCACTT	s	T	1	PSMA6	Proteasome (prosome, macropain) subunit, alpha type, 6	83	20	362	60	4.36145	5.42233e-13	0.0343782
GATCACAAAGACTGGCG	s	Th	1	PSMB10	Proteasome (prosome, macropain) subunit, beta type, 10	64	12	180	21	2.8125	3.89782e-05	0.043986
GATCCGCCTGGCAGCCA	s	T	1	PSMB6	Proteasome (prosome, macropain) subunit, beta type, 6	383	17	581	78	1.51697	0.000643351	0.0932286
GATCGCACTGCGCAGGG	s	Th	1	PSMC3	Proteasome (prosome, macropain) 26S subunit, ATPase, 3	291	2	567	19	1.94845	1.13208e-07	0.0343782
GATCATCTCCCCTGGCA	s	T	1	PSMD5	Proteasome (prosome, macropain) 26S subunit, non-ATPase, 5	10	10	78	17	7.8	7.66289e-05	0.0505712
GATCGTCTGAGCCCCCG	s	Th	1	PSMD8	Proteasome (prosome, macropain) 26S subunit, non-ATPase, 8	0	0	92	6	#DIV/0!	5.90933e-08	0.0343782
GATCACAGCTCACTGCG	s	Th	4	PTER	Phosphotriesterase related	0	0	38	1	#DIV/0!	0.000386126	0.0922803
GATCCTGAGTTGATAGC	s	Th	4	PTGES3	Prostaglandin E synthase 3 (cytosolic)	0	0	54	9	#DIV/0!	2.39413e-05	0.043986
GATCTCGGATGACCAAA	s	Th	1	PTMA	Prothymosin, alpha (gene sequence 28)	848	34	1158	82	1.36557	0.000117606	0.0718524
GATCACCGGCGTGCCCC	s	T	2	PTMA	Prothymosin, alpha (gene sequence 28)	128	30	249	28	1.94531	0.000961717	0.0934922
GATCCCCTCTTCTCAGA	s	Th	1	PTMS	Parathymosin	489	6	1137	1	2.32515	0	0.0343782
GATCCCCTGCAACTGGA	s	T	3	PTN	Pleiotrophin (heparin binding growth factor 8, neurite growth-promoting factor 1)	164	28	360	10	2.19512	5.04612e-06	0.0343782
GATCAGGTTCCCCGCCT	s	Th	4	PTN	Pleiotrophin (heparin binding growth factor 8, neurite growth-promoting factor 1)	16	4	85	3	5.3125	9.29499e-05	0.0545859
GATCCCTGATTAAGCTG	s	T	1	PTPN11	Protein tyrosine phosphatase, non-receptor type 11 (Noonan syndrome 1)	30	5	104	17	3.46667	0.000521127	0.0742493
GATCCCCAAGCACCAAC	s	T	3	PTPRA	Protein tyrosine phosphatase, receptor type, A	0	0	56	27	#DIV/0!	4.2002e-05	0.043986
GATCAGTACTGGCCTGC	s	Th	3	PTPRZ1	Protein tyrosine phosphatase, receptor-type, Z polypeptide 1	2	2	116	3	58	3.56326e-09	0.0343782
GATCCTCAGCCTTGTGA	s	T	1	PTPRZ1	Protein tyrosine phosphatase, receptor-type, Z polypeptide 1	524	8	6946	781	13.2557	0	0.0343782
GATCGCCAGAGCCCAGG	s	T	1	PTRF	Polymerase I and transcript release factor	0	0	154	9	#DIV/0!	7.19447e-12	0.0343782
GATCCTTGACGAGGAGA	s	T	1	PTTG1	Pituitary tumor-transforming 1	0	0	46	45	#DIV/0!	0.000137089	0.0620318
GATCCGGCCCCACATCG	s	T	4	PUM1	Pumilio homolog 1 (Drosophila)	63	12	214	56	3.39683	7.67087e-07	0.0343782
GATCAAACTGAATGAAA	s	Th	1	PURA	Purine-rich element binding protein A	56	11	143	17	2.55357	0.000474623	0.0925335
GATCGCTGCAGCCATGT	s	Th	1	PUS1	Pseudouridylate synthase 1	34	4	138	26	4.05882	9.14025e-06	0.0388462
GATCCCCTGGGCAAGCA	s	T	1	PUSL1	Pseudouridylate synthase-like 1	46	5	169	24	3.67391	4.82923e-06	0.0343782
GATCGCTGTAACAGGAG	s	Th	1	PXDN	Peroxidasin homolog (Drosophila)	5	5	210	13	42	4.88498e-15	0.0343782
GATCGGGTGGCCGATGG	s	Th	1	PXDN	Peroxidasin homolog (Drosophila)	34	2	362	13	10.6471	0	0.0343782
GATCCCATGGACATTTG	s	Th	1	PYCR1	Pyrroline-5-carboxylate reductase 1	0	0	67	13	#DIV/0!	2.66252e-06	0.0343782
GATCTGCGCACGGTGCA	s	T	1	PYGB	Phosphorylase, glycogen; brain	359	44	680	66	1.89415	8.27365e-08	0.0343782
GATCTCCCAAGCTTTGG	s	Th	1	QSOX2	Quiescin Q6 sulfhydryl oxidase 2	2	2	66	12	33	2.05542e-05	0.0406889
GATCCTGTGTAGAAGCT	s	T	1	RAB10	RAB10, member RAS oncogene family	30	1	130	8	4.33333	1.72513e-05	0.0388462
GATCTGTTGGCTTCCTG	s	T	3	RAB11FIP3	RAB11 family interacting protein 3 (class II)	2	2	56	25	28	0.000191644	0.0600848
GATCCATTTTGCTTACA	s	T	1	RAB14	RAB14, member RAS oncogene family	13	7	80	0	6.15385	0.000132602	0.0521146
GATCCCACCCTTGGACC	s	Th	4	RAB31	RAB31, member RAS oncogene family	27	1	143	27	5.2963	6.16157e-07	0.0343782
GATCTCTCACATCCAGC	s	Th	3	RAB7A	RAB7A, member RAS oncogene family	0	0	34	2	#DIV/0!	0.000678084	0.096944
GATCGTGCTGCACAACC	s	T	1	RABL4	RAB, member of RAS oncogene family-like 4	124	13	334	0	2.69355	1.62259e-07	0.0343782
GATCCGAGCAGTCCTCT	s	T	2	RAC1	Ras-related C3 botulinum toxin substrate 1 (rho family, small GTP binding protein Rac1)	355	22	674	55	1.89859	7.74526e-08	0.0343782
GATCGTGCCATTGTGAT	s	T	1	RAG1AP1	Recombination activating gene 1 activating protein 1	0	0	63	13	#DIV/0!	1.29653e-05	0.0388462
GATCTGCTGCTGAGACG	s	T	1	RAGE	Renal tumor antigen	5	5	230	16	46	1.77636e-15	0.0343782
GATCCCCGAGTGTGGGC	s	T	1	RAI1	Retinoic acid induced 1	70	9	249	2	3.55714	5.40726e-08	0.0343782
GATCCCTGGATTGCTGG	s	T	1	RAMP2	Receptor (G protein-coupled) activity modifying protein 2	25	1	119	3	4.76	3.24765e-05	0.0406889
GATCTGGTACGAGTGTG	s	Th	1	RAN	RAN, member RAS oncogene family	139	22	364	54	2.61871	2.27173e-08	0.0343782
GATCATAGCCTAGCAGG	s	Th	2	RANBP10	RAN binding protein 10	2	2	67	13	33.5	1.1906e-05	0.0388462
GATCCTTGTGCCAAACG	s	T	1	RANBP5	RAN binding protein 5	0	0	124	20	#DIV/0!	6.97537e-10	0.0343782
GATCGTGCCACCGCGCT	s	T	5	RASA3	RAS p21 protein activator 3	0	0	46	48	#DIV/0!	0.000137089	0.0620318
GATCCCGGGGGAAGACC	s	T	1	RAVER1	Ribonucleoprotein, PTB-binding 1	7	7	147	13	21	4.49663e-10	0.0343782
GATCCCTGGAGCTGGCC	s	T	1	RAVER1	Ribonucleoprotein, PTB-binding 1	43	2	163	11	3.7907	5.73593e-06	0.0343782
GATCCACTTTGGACCAC	s	T	4	RBBP4	Retinoblastoma binding protein 4	5	5	71	6	14.2	7.11295e-05	0.0435195
GATCAGAATTTCACCAG	s	Th	1	RBM25	RNA binding motif protein 25	64	7	166	21	2.59375	0.000181712	0.0622268
GATCTACCCTTCCCCCC	s	T	5	RBM26	RNA binding motif protein 26	5	5	67	17	13.4	0.000126029	0.0444611
GATCCAAGCCTGCAACT	s	Th	2	RBM28	RNA binding motif protein 28	8	1	64	0	8	0.000249785	0.0693882
GATCCGTGACAAGCGCA	s	Th	1	RBM42	RNA binding motif protein 42	70	5	230	18	3.28571	3.22498e-07	0.0343782
GATCTTCACGAGGCTGG	s	T	1	RBM8A	RNA binding motif protein 8A	30	1	139	9	4.63333	3.81628e-06	0.0343782
GATCGGCCTCGCCGTGT	s	T	3	RCCD1	RCC1 domain containing 1	10	10	91	7	9.1	8.16568e-06	0.0388462
GATCCCCAAGAGCTGTT	s	Th	2	RCN2	Reticulocalbin 2, EF-hand calcium binding domain	73	76	395	55	5.41096	0	0.0343782
GATCTGAACAAGGATGG	s	Th	1	RCN3	Reticulocalbin 3, EF-hand calcium binding domain	0	0	98	1	#DIV/0!	2.00256e-08	0.0343782
GATCCAGGATTCAAGCT	s	T	1	RCOR1	REST corepressor 1	0	0	82	2	#DIV/0!	7.02724e-07	0.0343782
GATCAGGCCGTTGCTGA	s	Th	3	RDBP	RD RNA binding protein	130	12	343	12	2.63846	3.9539e-08	0.0343782
GATCAGCTCCTAAGGGG	s	Th	4	RELA	V-rel reticuloendotheliosis viral oncogene homolog A, nuclear factor of kappa light polypeptide gene enhancer in B-cells 3, p65 (avian)	3	3	44	2	14.6667	0.000556847	0.0920388
GATCCTGTGCTTTCCGA	s	T	1	RELB	V-rel reticuloendotheliosis viral oncogene homolog B, nuclear factor of kappa light polypeptide gene enhancer in B-cells 3 (avian)	0	0	41	6	#DIV/0!	0.000451822	0.0725022
GATCGTCCACTGGGTGC	s	Th	4	RENBP	Renin binding protein	0	0	38	5	#DIV/0!	0.000386126	0.0922803
GATCATTTTTGGAAGCA	s	Th	1	REPIN1	Replication initiator 1	100	0	364	15	3.64	5.23204e-12	0.0343782
GATCTAGAAACCAGCAG	s	T	1	RERE	Arginine-glutamic acid dipeptide (RE) repeats	0	0	80	82	#DIV/0!	7.02724e-07	0.0343782
GATCATCTGAGGTCGTC	s	T	5	RFPL1S	Ret finger protein-like 1 antisense	0	0	56	2	#DIV/0!	4.2002e-05	0.043986
GATCACAAAATGTGCAT	s	Th	1	RFXDC2	Regulatory factor X domain containing 2	0	0	97	26	#DIV/0!	2.00256e-08	0.0343782
GATCAAGGCCACAGGGA	s	Th	1	RGL2	Ral guanine nucleotide dissociation stimulator-like 2	184	3	412	23	2.23913	1.45047e-07	0.0343782
GATCAGTTATGAAGAAG	s	Th	1	RHEB	Ras homolog enriched in brain	0	0	36	39	#DIV/0!	0.000678084	0.096944
GATCTTCGGAATGATGA	s	T	1	RHOA	Ras homolog gene family, member A	193	11	384	52	1.98964	1.46442e-05	0.0406889
GATCCCCGGGGGCGAGA	s	T	1	RHOB	Ras homolog gene family, member B	1485	6	1962	46	1.32121	1.34996e-05	0.043986
GATCTGCCTTATTGCAT	s	T	1	RHOQ	Ras homolog gene family, member Q	5	1	80	15	16	1.27976e-05	0.0343782
GATCCCCCATCCCCCTG	s	Th	1	RIF1	RAP1 interacting factor homolog (yeast)	6	3	66	5	11	7.72305e-05	0.0508427
GATCCAAACTTTCTGTC	s	T	4	RIOK3	RIO kinase 3 (yeast)	0	0	59	6	#DIV/0!	2.33168e-05	0.0406889
GATCCTCAGACCCTGCA	s	T	1	RNASEH2C	Ribonuclease H2, subunit C	27	8	154	50	5.7037	1.86539e-07	0.0343782
GATCATCCAGCAGCTCG	s	T	1	RNF126	Ring finger protein 126	38	3	117	23	3.07895	0.000694067	0.0719919
GATCCCGGCTTCCTCAC	s	T	1	RNF157	Ring finger protein 157	173	14	388	0	2.24277	7.83082e-07	0.0343782
GATCCCTCTTTTCCAGA	s	Th	1	RNF20	Ring finger protein 20	0	0	41	15	#DIV/0!	0.000220483	0.0725022
GATCCCCCCAAGCCCAG	s	Th	1	RNF25	Ring finger protein 25	11	5	102	28	9.27273	2.48912e-06	0.0343782
GATCTGCCGACCTTGCT	s	T	1	RNF44	Ring finger protein 44	146	9	275	16	1.88356	0.000736755	0.0932084
GATCGGAATGCAAATCT	s	Th	1	RNPS1	RNA binding protein S1, serine-rich domain	0	0	89	7	#DIV/0!	1.01597e-07	0.0343782
GATCAGAAACTTCCGGC	s	Th	4	RP13-122B23.3	Cofactor of BRCA1	0	0	46	16	#DIV/0!	0.000126201	0.0620318
GATCTTCGTAACGGCCT	s	T	1	RP3-402G11.5	Selenoprotein O	78	5	173	2	2.21795	0.00134327	0.0975604
GATCCTGGAGCCCCCGC	s	T	1	RP5-1077B9.4	Invasion inhibitory protein 45	58	7	256	6	4.41379	1.98181e-09	0.0343782
GATCCCAGGTGTGGTGG	s	T	1	RPIA	Ribose 5-phosphate isomerase A (ribose 5-phosphate epimerase)	0	0	87	22	#DIV/0!	2.20516e-07	0.0343782
GATCATCCTTCCTGGCA	s	T	1	RPL11	Ribosomal protein L11	339	23	572	50	1.68732	3.27951e-05	0.0444611
GATCCTGGGGACTGCCC	s	T	1	RPL12	Ribosomal protein L12	13	4	126	34	9.69231	1.79132e-07	0.0343782
GATCATTTGACAACTGG	s	T	1	RPL12	Ribosomal protein L12	53	12	149	4	2.81132	0.00028131	0.0631075
GATCCGAGGAGGCGGGA	s	Th	1	RPL13	Ribosomal protein L13	0	0	494	142	#DIV/0!	0	0.0343782
GATCCGAGGAGGCGGAA	s	T	1	RPL13	Ribosomal protein L13	2131	125	5284	387	2.47959	0	0.0343782
GATCCACTACCGGAAGA	s	T	1	RPL13A	Ribosomal protein L13a	1039	8	1651	123	1.58903	2.16133e-10	0.0343782
GATCACCGCCGCGAGTA	s	T	1	RPL14	Ribosomal protein L14	221	66	421	271	1.90498	2.10048e-05	0.0406889
GATCACCAAACCAGTCA	s	Th	4	RPL15	Ribosomal protein L15	0	0	182	78	#DIV/0!	1.75415e-14	0.0343782
GATCACCAAACCAGTCC	s	Th	1	RPL15	Ribosomal protein L15	337	23	574	150	1.70326	1.11263e-05	0.0435195
GATCCTCACTTTCGACC	s	T	1	RPL18	Ribosomal protein L18	5	2	58	4	11.6	0.000395706	0.0630416
GATCAAGTTCCCGCTGC	s	Th	1	RPL18A	Ribosomal protein L18a	1065	35	2127	111	1.99718	0	0.0343782
GATCACCGTGACATCCG	s	T	1	RPL22	Ribosomal protein L22	461	32	789	58	1.7115	5.62275e-07	0.0343782
GATCAAGGGACGGCTGA	s	Th	1	RPL23	Ribosomal protein L23	740	15	1971	41	2.66351	0	0.0343782
GATCATCTAAACTGAGT	s	T	1	RPL23A	Ribosomal protein L23a	334	25	798	37	2.38922	1.16351e-13	0.0343782
GATCCTCGAACGGAAAG	s	T	1	RPL26	Ribosomal protein L26	1061	61	1946	193	1.83412	0	0.0343782
GATCCGCAAGAACAAGT	s	T	1	RPL28	Ribosomal protein L28	551	8	1463	92	2.65517	0	0.0343782
GATCCGGCCAGCGGAAG	s	T	2	RPL28	Ribosomal protein L28	0	0	45	6	#DIV/0!	0.000248529	0.0620318
GATCAAACCAAGGCCCA	s	Th	1	RPL29	Ribosomal protein L29	86	89	982	249	11.4186	0	0.0343782
GATCAAGAACAATGCCT	s	Th	1	RPL3	Ribosomal protein L3	1069	106	1563	6	1.46211	6.02297e-08	0.0343782
GATCCAGGTGACTCTGA	s	T	1	RPL30	Ribosomal protein L30	468	45	1010	69	2.15812	3.01981e-14	0.0343782
GATCAAGCGTGCTTTCC	s	Th	1	RPL34	Ribosomal protein L34	206	13	438	7	2.12621	2.54554e-07	0.0343782
GATCCGAGTCGTCCGGA	s	T	1	RPL35	Ribosomal protein L35	768	6	1742	168	2.26823	0	0.0343782
GATCCCCCTACCCTGAC	s	T	4	RPL36	Ribosomal protein L36	0	0	48	17	#DIV/0!	0.000137089	0.0602665
GATCTGGCACTGTGGTT	s	Th	1	RPL37A	Ribosomal protein L37a	980	86	2629	167	2.68265	0	0.0343782
GATCTGGCACTGTGGCT	s	Th	2	RPL37A	Ribosomal protein L37a	0	0	52	57	#DIV/0!	4.15955e-05	0.0503822
GATCACCTCTGAGACCC	s	T	1	RPL41	Ribosomal protein L41	1444	49	2972	156	2.05817	0	0.0343782
GATCTCCAACCAGGCCA	s	T	1	RPL6	Ribosomal protein L6	116	11	351	5	3.02586	3.41878e-09	0.0343782
GATCTGTGTTTGCTCTG	s	Th	1	RPL6	Ribosomal protein L6	591	39	1169	73	1.978	8.21565e-15	0.0343782
GATCCGCCGTCACTGGG	s	T	1	RPL7A	Ribosomal protein L7a	407	9	1652	140	4.05897	0	0.0343782
GATCAAGACTGGAGACA	s	Th	1	RPLP0-like	Ribosomal protein P0-like	5	5	92	13	18.4	1.05315e-06	0.0343782
GATCTTGGACAGCGTGG	s	Th	1	RPLP2	Ribosomal protein, large, P2	720	33	1912	6	2.65556	0	0.0343782
GATCCGGATTGGTGCCA	s	T	1	RPN2	Ribophorin II	33	1	427	20	12.9394	0	0.0343782
GATCCCCGACCACCCTA	s	T	1	RPP25	Ribonuclease P/MRP 25kDa subunit	0	0	48	49	#DIV/0!	0.000137089	0.0602665
GATCGCCTTGTGACCGG	s	Th	1	RPRM	Reprimo, TP53 dependent G2 arrest mediator candidate	0	0	57	6	#DIV/0!	1.38001e-05	0.0406889
GATCGGTGACATCGTCA	s	Th	1	RPS11	Ribosomal protein S11	761	22	1117	80	1.46781	4.18328e-06	0.0388462
GATCCTCTCTGGCGTGG	s	T	1	RPS11	Ribosomal protein S11	33	5	106	11	3.21212	0.000680072	0.0926727
GATCGGTGTAATCCTGA	s	Th	1	RPS13	Ribosomal protein S13	0	0	89	26	#DIV/0!	1.01597e-07	0.0343782
GATCGGCCACTACCTGG	s	Th	1	RPS15	Ribosomal protein S15	1087	6	3233	170	2.97424	0	0.0343782
GATCAGCCCCAGATTTG	s	Th	1	RPS15A	Ribosomal protein S15a	142	28	659	173	4.64085	0	0.0343782
GATCAAAGACATCCTCA	s	Th	1	RPS16	Ribosomal protein S16	220	12	627	12	2.85	5.77316e-15	0.0343782
GATCCCAGACTGGTTCT	s	Th	1	RPS18	Ribosomal protein S18	431	10	838	27	1.94432	1.26955e-10	0.0343782
GATCTGGACAGAATCGC	s	T	1	RPS19	Ribosomal protein S19	329	10	2001	54	6.08207	0	0.0343782
GATCGGCAAGCCCCCCA	s	T	1	RPS2	Ribosomal protein S2	0	0	2278	46	#DIV/0!	0	0.0343782
GATCGGCAAGCCCCACA	s	Th	1	RPS2	Ribosomal protein S2	523	90	1958	99	3.74379	0	0.0343782
GATCATGAAAATGGGTC	s	T	4	RPS25	Ribosomal protein S25	0	0	54	15	#DIV/0!	4.2002e-05	0.043986
GATCTCGTGAAGCCCGC	s	Th	1	RPS26	Ribosomal protein S26	808	42	1604	177	1.98515	0	0.0343782
GATCTTTGCTGGCAAGC	s	T	1	RPS27A	Ribosomal protein S27a	996	50	2022	189	2.03012	0	0.0343782
GATCCGGAAATATGGCC	s	T	1	RPS29	Ribosomal protein S29	375	25	761	23	2.02933	6.90326e-10	0.0343782
GATCATGCTGCCCTGGG	s	T	1	RPS3	Ribosomal protein S3	556	29	2200	122	3.95683	0	0.0343782
GATCATACACCTGCTCA	s	Th	1	RPS5	Ribosomal protein S5	322	14	567	4	1.76087	3.84176e-06	0.0388462
GATCCCCGAGGAGTCCC	s	T	1	RRP9	RRP9, small subunit (SSU) processome component, homolog (yeast)	37	5	189	3	5.10811	3.21338e-08	0.0343782
GATCCACTTGTGCATGT	s	Th	1	RSBN1	Round spermatid basic protein 1	0	0	36	1	#DIV/0!	0.000678084	0.096944
GATCCCCTGAGGTCGGG	s	T	4	RSPH3	Radial spoke head 3 homolog (Chlamydomonas)	0	0	176	5	#DIV/0!	2.35589e-13	0.0343782
GATCACAACAGAGAGGG	s	Th	1	RUNX1T1	Runt-related transcription factor 1; translocated to, 1 (cyclin D-related)	12	0	102	8	8.5	2.48912e-06	0.0343782
GATCCTGACTGCTGTCA	s	T	1	S100A4	S100 calcium binding protein A4	0	0	46	10	#DIV/0!	0.000137089	0.0620318
GATCTACAATGAAGCCC	s	T	1	S100A6	S100 calcium binding protein A6	179	20	425	18	2.3743	5.66489e-08	0.0343782
GATCTGGCTGTGAGGCC	s	Th	1	SAA1	Serum amyloid A1	0	0	612	0	#DIV/0!	0	0.0343782
GATCAGGCTGCCAATAA	s	Th	1	SAA2	Serum amyloid A2	0	0	80	1	#DIV/0!	3.00871e-07	0.0343782
GATCTTTTGTTCTTCTG	s	T	3	SAMD4A	Sterile alpha motif domain containing 4A	0	0	59	5	#DIV/0!	2.33168e-05	0.0406889
GATCTGGTGCTTCTTCT	s	Th	1	SAP18	Sin3A-associated protein, 18kDa	9	3	75	21	8.33333	5.17647e-05	0.0517904
GATCACCTGACAGGGCA	s	Th	1	SAPS2	SAPS domain family, member 2	12	13	169	2	14.0833	4.17399e-11	0.0343782
GATCAAGCCAAGAAGGA	s	Th	5	SAR1B	SAR1 gene homolog B (S. cerevisiae)	6	3	62	11	10.3333	0.000132225	0.0521146
GATCCTCCTTTCCTCAT	s	T	3	SARM1	Sterile alpha and TIR motif containing 1	22	22	110	10	5	3.65576e-05	0.0435195
GATCGAATACGTGGATG	s	Th	1	SART1	Squamous cell carcinoma antigen recognized by T cells	17	17	103	20	6.05882	1.24844e-05	0.0388462
GATCCGACCCATCTTCA	s	Th	2	SART3	Squamous cell carcinoma antigen recognized by T cells 3	9	0	62	2	6.88889	0.000421329	0.0921634
GATCCCCGAGGGCTGCG	s	T	4	SBNO2	Strawberry notch homolog 2 (Drosophila)	0	0	134	23	#DIV/0!	2.2185e-10	0.0343782
GATCCAGTTCAGCCCAC	s	T	4	SBNO2	Strawberry notch homolog 2 (Drosophila)	5	5	119	12	23.8	4.25911e-08	0.0343782
GATCCTAGGCCTCTCTG	s	T	5	SCARB2	Scavenger receptor class B, member 2	0	0	37	3	#DIV/0!	0.000824106	0.0922803
GATCACTAATGGTCAAG	s	Th	1	SCARB2	Scavenger receptor class B, member 2	81	18	180	7	2.22222	0.000576727	0.093059
GATCCACGGCAAGCACA	s	T	1	SCARF2	Scavenger receptor class F, member 2	15	2	74	24	4.93333	0.00101933	0.092717
GATCCAAAGCTGGTCGA	s	T	1	SCG3	Secretogranin III	329	113	793	166	2.41033	6.21725e-14	0.0343782
GATCAAGCTGAAGTGAA	s	Th	2	SCO1	SCO cytochrome oxidase deficient homolog 1 (yeast)	6	0	51	2	8.5	0.000663967	0.0931773
GATCAGAGCTTGAACAC	s	Th	1	SCP2	Sterol carrier protein 2	97	22	310	39	3.19588	2.28121e-09	0.0343782
GATCCGTCTGCCAAGAG	s	T	1	SCRIB	Scribbled homolog (Drosophila)	35	7	119	3	3.4	0.000349828	0.0632403
GATCTTAGCTGTGGGGT	s	Th	1	SCRN1	Secernin 1	0	0	100	7	#DIV/0!	1.16666e-08	0.0343782
GATCCCAGGAACTTGAG	s	T	1	SCUBE2	Signal peptide, CUB domain, EGF-like 2	0	0	71	21	#DIV/0!	4.02592e-06	0.0343782
GATCGTTCATCCGATTG	s	Th	3	SCUBE2	Signal peptide, CUB domain, EGF-like 2	0	0	148	5	#DIV/0!	6.29585e-12	0.0343782
GATCTGCACCTTCTGCC	s	Th	2	SCXB	Scleraxis homolog B (mouse)	6	3	59	1	9.83333	0.000226409	0.0630416
GATCGCTGGAGGCATGT	s	Th	1	SDC3	Syndecan 3	398	12	1281	18	3.21859	0	0.0343782
GATCCGCGGCGGCTCGG	s	T	1	SDF2L1	Stromal cell-derived factor 2-like 1	73	13	193	44	2.64384	7.0246e-05	0.0503822
GATCCTCCCGCCTCCCC	s	T	5	SDHC	Succinate dehydrogenase complex, subunit C, integral membrane protein, 15kDa	0	0	265	11	#DIV/0!	0	0.0343782
GATCCTGGCATCTATGT	s	T	2	SEC14L2	SEC14-like 2 (S. cerevisiae)	0	0	37	12	#DIV/0!	0.000824106	0.0922803
GATCCTAAGAAGGGGGC	s	Th	1	SEC61A1	Sec61 alpha 1 subunit (S. cerevisiae)	125	14	589	74	4.712	0	0.0343782
GATCAGTTGCTCCAGTG	s	Th	5	SEC61A1	Sec61 alpha 1 subunit (S. cerevisiae)	0	0	46	3	#DIV/0!	0.000126201	0.0620318
GATCCACTGTCCGGCAG	s	Th	1	SEC61B	Sec61 beta subunit	103	18	438	22	4.25243	4.44089e-16	0.0343782
GATCTGGAGCCACAGTC	s	T	1	SELI	Selenoprotein I	0	0	48	14	#DIV/0!	0.000137089	0.0602665
GATCTATCCTCAGCACT	s	Th	1	SEMA5A	Sema domain, seven thrombospondin repeats (type 1 and type 1-like), transmembrane domain (TM) and short cytoplasmic domain, (semaphorin) 5A	25	1	216	26	8.64	3.57137e-12	0.0343782
GATCAGGCTGGGAACCA	s	Th	3	SEMA6C	Sema domain, transmembrane domain (TM), and cytoplasmic domain, (semaphorin) 6C	0	0	157	19	#DIV/0!	1.26432e-12	0.0343782
GATCCTCAAGTGCCCAT	s	T	1	SEPHS1	Selenophosphate synthetase 1	23	4	85	17	3.69565	0.00122507	0.094873
GATCCCCTTTGGTTTTA	s	T	1	SEPT2	Septin 2	108	11	258	44	2.38889	2.43436e-05	0.0406889
GATCCGCTCTGGTCAAA	s	T	2	SEPX1	Selenoprotein X, 1	18	9	76	15	4.22222	0.00145898	0.0967551
GATCATGCAGCAGAAGC	s	T	1	SERF2	Small EDRK-rich factor 2	276	34	843	16	3.05435	0	0.0343782
GATCTGTGCCAGCTGGG	s	Th	1	SERINC2	Serine incorporator 2	0	0	256	16	#DIV/0!	0	0.0343782
GATCCGTATGGCCAACG	s	T	1	SERP1	Stress-associated endoplasmic reticulum protein 1	68	11	215	40	3.16176	3.04322e-06	0.0343782
GATCTGAAGAGCGTCCT	s	T	1	SERPINA1	Serpin peptidase inhibitor, clade A (alpha-1 antiproteinase, antitrypsin), member 1	22	7	137	25	6.22727	9.50325e-07	0.0343782
GATCATTGTCCCTACAG	s	Th	1	SERPINA3	Serpin peptidase inhibitor, clade A (alpha-1 antiproteinase, antitrypsin), member 3	0	0	190	12	#DIV/0!	5.9952e-15	0.0343782
GATCTGTCTGGCATGTC	s	T	1	SERPINB1	Serpin peptidase inhibitor, clade B (ovalbumin), member 1	3	3	104	27	34.6667	1.01855e-07	0.0343782
GATCCGCCCGCCTCCCC	s	T	5	SERPINB6	Serpin peptidase inhibitor, clade B (ovalbumin), member 6	0	0	1970	1067	#DIV/0!	0	0.0343782
GATCTGTCTCCAAGACC	s	T	1	SERPINE1	Serpin peptidase inhibitor, clade E (nexin, plasminogen activator inhibitor type 1), member 1	2	2	46	4	23	0.000621641	0.0920388
GATCTGGCCCTCCCCCG	s	Th	5	SERPINE2	Serpin peptidase inhibitor, clade E (nexin, plasminogen activator inhibitor type 1), member 2	0	0	80	21	#DIV/0!	3.00871e-07	0.0343782
GATCAGGTTAGGGCGAG	s	T	1	SERPING1	Serpin peptidase inhibitor, clade G (C1 inhibitor), member 1, (angioedema, hereditary)	33	11	314	57	9.51515	2.22045e-16	0.0343782
GATCAAGCCTGCCTCAA	s	Th	1	SERPINH1	Serpin peptidase inhibitor, clade H (heat shock protein 47), member 1, (collagen binding protein 1)	5	2	110	20	22	4.23827e-08	0.0343782
GATCCCGTGTCTGTGTG	s	Th	1	SETD1A	SET domain containing 1A	23	4	102	1	4.43478	0.000125047	0.0512997
GATCCTCAGCCCGAACT	s	T	2	SETD5	SET domain containing 5	27	1	113	29	4.18519	5.36897e-05	0.0510659
GATCCTAAGGGGTTCAG	s	T	1	SEZ6	Seizure related 6 homolog (mouse)	91	5	210	19	2.30769	0.000244797	0.0624847
GATCTTCCTATGTCCTT	s	T	1	SEZ6L	Seizure related 6 homolog (mouse)-like	12	5	87	4	7.25	4.45938e-05	0.0435195
GATCACCTGAGCTGCCT	s	Th	1	SF1	Splicing factor 1	327	15	712	32	2.17737	2.37506e-11	0.0343782
GATCCCCCAGAGACCCC	s	T	1	SF3A3	Splicing factor 3a, subunit 3, 60kDa	65	14	238	46	3.66154	1.02466e-07	0.0343782
GATCCTATGGCCATGAC	s	T	1	SF3B2	Splicing factor 3b, subunit 2, 145kDa	280	3	481	17	1.71786	9.75191e-05	0.0521146
GATCTCCCATGGGTCAC	s	T	1	SF3B4	Splicing factor 3b, subunit 4, 49kDa	25	7	110	1	4.4	8.84789e-05	0.0503822
GATCAGGTGAGCTGTGT	s	Th	1	SFPQ	Splicing factor proline/glutamine-rich (polypyrimidine tract binding protein associated)	262	0	1155	82	4.4084	0	0.0343782
GATCGGGGAAATCTGCA	s	Th	4	SFRS10	Splicing factor, arginine/serine-rich 10 (transformer 2 homolog, Drosophila)	0	0	52	4	#DIV/0!	4.15955e-05	0.0503822
GATCAACAACCCCTCCC	s	Th	1	SFRS18	Splicing factor, arginine/serine-rich 18	9	9	113	13	12.5556	9.17356e-08	0.0343782
GATCAACGTGGAAATCT	s	Th	3	SFRS18	Splicing factor, arginine/serine-rich 18	31	2	133	22	4.29032	6.30501e-06	0.0388462
GATCGAAGAGTCCCCCC	s	Th	1	SFRS2	Splicing factor, arginine/serine-rich 2	0	0	95	26	#DIV/0!	3.4391e-08	0.0343782
GATCTGCTGGCAGGGTT	s	T	1	SFRS6	Splicing factor, arginine/serine-rich 6	23	2	382	13	16.6087	0	0.0343782
GATCAACAGTTACTGTG	s	T	3	SFRS9	Splicing factor, arginine/serine-rich 9	33	21	228	37	6.90909	3.75704e-11	0.0343782
GATCACAGATGGATTTT	s	Th	1	SGK	Serum/glucocorticoid regulated kinase	2	2	71	10	35.5	6.90253e-06	0.0388462
GATCTCTTCCATGTCCC	s	Th	1	SGK269	NKF3 kinase family member	6	3	52	14	8.66667	0.000663967	0.0741054
GATCGTGTGGCTTCCAA	s	T	1	SGTA	Small glutamine-rich tetratricopeptide repeat (TPR)-containing, alpha	138	4	267	14	1.93478	0.00064203	0.0919924
GATCCCCCACAGCCTGG	s	Th	1	SH2B1	SH2B adaptor protein 1	86	14	261	1	3.03488	1.45535e-07	0.0343782
GATCCAAGCCACGCTCA	s	Th	3	SH3D19	SH3 domain protein D19	0	0	79	4	#DIV/0!	5.183e-07	0.0343782
GATCCGGGGCCAGGTGA	s	T	4	SH3GL1	SH3-domain GRB2-like 1	0	0	39	3	#DIV/0!	0.000451822	0.0725022
GATCCCCACACTTACTC	s	T	1	SH3PXD2B	SH3 and PX domains 2B	0	0	76	0	#DIV/0!	1.25613e-06	0.0343782
GATCCACTGACCAGATT	s	T	4	SH3RF1	SH3 domain containing ring finger 1	5	2	72	4	14.4	4.01493e-05	0.0406889
GATCCCACCACAGGCCT	s	Th	1	SHC3	SHC (Src homology 2 domain containing) transforming protein 3	0	0	46	13	#DIV/0!	0.000126201	0.0620318
GATCAGCCCTGGGAGTG	s	Th	1	SHD	Src homology 2 domain containing transforming protein D	37	8	276	5	7.45946	3.24185e-14	0.0343782
GATCCCATTTGTCCGAG	s	Th	1	SHPRH	SNF2 histone linker PHD RING helicase	12	6	126	5	10.5	3.83401e-08	0.0343782
GATCAGACCGAGAAGCA	s	Th	1	SIPA1L2	Signal-induced proliferation-associated 1 like 2	67	18	284	26	4.23881	9.07761e-11	0.0343782
GATCCTGCCATTCTGGA	s	Th	1	SIRT5	Sirtuin (silent mating type information regulation 2 homolog) 5 (S. cerevisiae)	5	5	54	22	10.8	0.000387715	0.0705426
GATCAACTTTGACCTGG	s	Th	5	SKIP	SPHK1 (sphingosine kinase type 1) interacting protein	0	0	36	6	#DIV/0!	0.000678084	0.096944
GATCCGCCCATCTCCGT	s	T	2	SLC11A1	Solute carrier family 11 (proton-coupled divalent metal ion transporters), member 1	0	0	35	36	#DIV/0!	0.000824106	0.096944
GATCTTCACAGAAAGTG	s	T	1	SLC11A2	Solute carrier family 11 (proton-coupled divalent metal ion transporters), member 2	12	1	104	2	8.66667	4.96066e-06	0.0343782
GATCAGTGCCTCACGCA	s	Th	1	SLC12A7	Solute carrier family 12 (potassium/chloride transporters), member 7	0	0	72	1	#DIV/0!	1.54173e-06	0.0343782
GATCCTGGGCTTGGGCA	s	Th	1	SLC12A9	Solute carrier family 12 (potassium/chloride transporters), member 9	37	17	220	6	5.94595	1.49616e-10	0.0343782
GATCTGCGGTGAAGCCA	s	T	1	SLC16A3	Solute carrier family 16, member 3 (monocarboxylic acid transporter 4)	0	0	45	8	#DIV/0!	0.000248529	0.0620318
GATCCGCTTCTGCTCCG	s	T	4	SLC25A26	Solute carrier family 25, member 26	0	0	52	6	#DIV/0!	7.58015e-05	0.0503822
GATCCAGTTCTTGTTTT	s	T	5	SLC25A32	Solute carrier family 25, member 32	0	0	113	25	#DIV/0!	3.90076e-09	0.0343782
GATCATCACTTACCCAC	s	T	3	SLC25A39	Solute carrier family 25, member 39	86	3	193	19	2.24419	0.00057319	0.0728626
GATCGCACAGACTGTCA	s	Th	1	SLC25A5	Solute carrier family 25 (mitochondrial carrier; adenine nucleotide translocator), member 5	356	22	594	63	1.66854	1.55467e-05	0.0444611
GATCCCCCCCCACCCCG	s	Th	4	SLC25A6	Solute carrier family 25 (mitochondrial carrier; adenine nucleotide translocator), member 6	0	0	39	43	#DIV/0!	0.000386126	0.0725022
GATCCAGGCCTCCTGTG	s	Th	2	SLC27A1	Solute carrier family 27 (fatty acid transporter), member 1	3	0	51	15	17	0.000184457	0.0693882
GATCCAGCTGTCTCTGA	s	T	1	SLC27A3	Solute carrier family 27 (fatty acid transporter), member 3	3	0	91	3	30.3333	5.73516e-07	0.0343782
GATCCAGCCCAGGGCGA	s	T	3	SLC29A2	Solute carrier family 29 (nucleoside transporters), member 2	3	3	71	17	23.6667	1.85263e-05	0.0388462
GATCCTCTTCGCCAATC	s	T	1	SLC35B1	Solute carrier family 35, member B1	22	6	175	33	7.95455	4.52721e-09	0.0343782
GATCTGTTTCGTGTGCC	s	T	5	SLC35C2	Solute carrier family 35, member C2	0	0	48	25	#DIV/0!	0.000137089	0.0602665
GATCCTCTGCCACGGGT	s	T	1	SLC43A3	Solute carrier family 43, member 3	12	5	93	35	7.75	2.58011e-05	0.0388462
GATCCCACCAGTTTCTG	s	Th	1	SLC44A2	Solute carrier family 44, member 2	8	4	113	7	14.125	9.17356e-08	0.0343782
GATCCTGGAGAGGGAGA	s	T	1	SLC44A2	Solute carrier family 44, member 2	80	0	223	5	2.7875	8.65978e-06	0.0343782
GATCAGCTTTGGGTAGT	s	Th	2	SLC46A3	Solute carrier family 46, member 3	0	0	59	9	#DIV/0!	1.38001e-05	0.0406889
GATCCAGTGGTGCAAGA	s	Th	1	SLC7A1	Solute carrier family 7 (cationic amino acid transporter, y+ system), member 1	11	7	67	20	6.09091	0.000427211	0.0699457
GATCCCAGAGCACTGCT	s	T	1	SLC7A6	Solute carrier family 7 (cationic amino acid transporter, y+ system), member 6	169	20	343	5	2.02959	2.93036e-05	0.0435195
GATCCGGAGCCCCTGTG	s	T	4	SLC7A6	Solute carrier family 7 (cationic amino acid transporter, y+ system), member 6	0	0	43	8	#DIV/0!	0.000248529	0.0696973
GATCCGCCTCCAGTGAC	s	T	3	SLC9A3R1	Solute carrier family 9 (sodium/hydrogen exchanger), member 3 regulator 1	0	0	46	8	#DIV/0!	0.000137089	0.0620318
GATCGACAAGGCCTGTC	s	Th	2	SLCO4A1	Solute carrier organic anion transporter family, member 4A1	3	3	43	7	14.3333	0.00096987	0.0961818
GATCACTCTTTCATGCC	s	T	1	SMAP1L	Stromal membrane-associated protein 1-like	0	0	56	57	#DIV/0!	4.2002e-05	0.043986
GATCAAGCTTGGCCGGA	s	Th	1	SMARCA4	SWI/SNF related, matrix associated, actin dependent regulator of chromatin, subfamily a, member 4	423	19	704	23	1.6643	2.94134e-06	0.0388462
GATCGGGTGGGGGTGGA	s	Th	1	SMARCB1	SWI/SNF related, matrix associated, actin dependent regulator of chromatin, subfamily b, member 1	75	6	202	9	2.69333	1.52791e-05	0.043986
GATCCCACCTACGGTCT	s	Th	1	SMARCC1	SWI/SNF related, matrix associated, actin dependent regulator of chromatin, subfamily c, member 1	0	0	77	4	#DIV/0!	5.183e-07	0.0343782
GATCAAACTTCGGCACT	s	Th	2	SMARCC2	SWI/SNF related, matrix associated, actin dependent regulator of chromatin, subfamily c, member 2	80	7	228	6	2.85	2.23888e-06	0.0343782
GATCTGAGATGGTTTTT	s	Th	1	SMARCD1	SWI/SNF related, matrix associated, actin dependent regulator of chromatin, subfamily d, member 1	0	0	41	38	#DIV/0!	0.000220483	0.0725022
GATCCAGCAGGTCCAGC	s	T	4	SMARCD1	SWI/SNF related, matrix associated, actin dependent regulator of chromatin, subfamily d, member 1	0	0	41	18	#DIV/0!	0.000451822	0.0725022
GATCCCATAGACCAGAG	s	Th	1	SMARCE1	SWI/SNF related, matrix associated, actin dependent regulator of chromatin, subfamily e, member 1	42	0	353	6	8.40476	0	0.0343782
GATCACCCGGGAAGACG	s	Th	4	SMG1	PI-3-kinase-related kinase SMG-1	0	0	39	4	#DIV/0!	0.000386126	0.0725022
GATCGTGTGTGTAGGTG	s	Th	1	SMOC1	SPARC related modular calcium binding 1	70	7	381	43	5.44286	2.22045e-16	0.0343782
GATCCATAAGAAACAAG	s	Th	4	SMURF2	SMAD specific E3 ubiquitin protein ligase 2	3	0	43	3	14.3333	0.00096987	0.0961818
GATCCTAGGAGACAGTC	s	T	1	SNAPIN	SNAP-associated protein	45	13	191	9	4.24444	2.74221e-07	0.0343782
GATCCCCCCTGGAAGAG	s	T	1	SNRPB	Small nuclear ribonucleoprotein polypeptides B and B1	221	7	449	42	2.03167	2.4294e-06	0.0343782
GATCAATGAAGTGAGAA	s	Th	1	SNRPE	Small nuclear ribonucleoprotein polypeptide E	0	0	62	18	#DIV/0!	7.965e-06	0.0388462
GATCACCCAAACTATTG	s	Th	3	SNRPN	Small nuclear ribonucleoprotein polypeptide N	2	2	80	9	40	1.35116e-06	0.0343782
GATCCACGTGTGTGGCC	s	T	1	SNRPN	Small nuclear ribonucleoprotein polypeptide N	7	0	100	9	14.2857	7.36463e-07	0.0343782
GATCCTTTTGGTTTGGA	s	T	4	SNW1	SNW domain containing 1	0	0	59	1	#DIV/0!	2.33168e-05	0.0406889
GATCCCAGGGAAGGGGC	s	Th	1	SNX22	Sorting nexin 22	8	8	548	10	68.5	0	0.0343782
GATCTTGGCCCAACCAA	s	Th	1	SNX26	Sorting nexin 26	0	0	121	6	#DIV/0!	4.60248e-10	0.0343782
GATCCAGGTCTAGGCCC	s	T	1	SNX6	Sorting nexin 6	3	3	45	1	15	0.00112264	0.0920388
GATCACTTGACGACAGG	s	Th	4	SOBP	Sine oculis binding protein homolog (Drosophila)	0	0	36	34	#DIV/0!	0.000678084	0.096944
GATCCCAGCAAGATAAT	s	Th	1	SOD2	Superoxide dismutase 2, mitochondrial	139	10	372	52	2.67626	7.43927e-09	0.0343782
GATCTGGCAGGAGGTCA	s	Th	4	SOD3	Superoxide dismutase 3, extracellular	0	0	44	2	#DIV/0!	0.000126201	0.0620318
GATCGAAGCCATGACTG	s	Th	1	SOLH	Small optic lobes homolog (Drosophila)	41	8	134	4	3.26829	6.59893e-05	0.0545859
GATCCCAACTTTCCATT	s	Th	1	SOX2	SRY (sex determining region Y)-box 2	31	5	248	22	8	2.06946e-13	0.0343782
GATCAAGGAGCGCGGCG	s	Th	4	SOX4	SRY (sex determining region Y)-box 4	3	3	394	12	131.333	0	0.0343782
GATCTCGGGAGACTGGC	s	Th	4	SOX4	SRY (sex determining region Y)-box 4	6	6	203	37	33.8333	1.39888e-14	0.0343782
GATCTCACAGGCTGAGA	s	Th	1	SPARC	Secreted protein, acidic, cysteine-rich (osteonectin)	144	11	485	1	3.36806	1.79856e-14	0.0343782
GATCCCAGGCTTCTGCG	s	Th	1	SPECC1L	SPECC1-like	12	3	90	9	7.5	1.17881e-05	0.0406889
GATCCTGGCTGCAGAGC	s	T	1	SPEG	SPEG complex locus	28	1	137	27	4.89286	6.32642e-06	0.0343782
GATCAGAGTGCCATGGC	s	Th	1	SPG21	Spastic paraplegia 21 (autosomal recessive, Mast syndrome)	0	0	80	87	#DIV/0!	3.00871e-07	0.0343782
GATCCAGCGGGCGGCCC	s	T	1	SPHK1	Sphingosine kinase 1	3	0	59	1	19.6667	0.000106657	0.0512997
GATCCTCCTTCCTGGGA	s	Th	4	SPINT2	Serine peptidase inhibitor, Kunitz type, 2	0	0	41	18	#DIV/0!	0.000220483	0.0725022
GATCCGCTCGGCAGGCT	s	T	1	SPOCD1	SPOC domain containing 1	3	0	204	10	68	2.06501e-14	0.0343782
GATCGGAGCCCCTGGGA	s	Th	1	SPPL2B	Signal peptide peptidase-like 2B	0	0	98	35	#DIV/0!	2.00256e-08	0.0343782
GATCTGCGACAAGCAGT	s	Th	3	SPRY2	Sprouty homolog 2 (Drosophila)	156	5	320	10	2.05128	2.2046e-05	0.0503822
GATCTGCACCAGAACCC	s	T	4	SPRY4	Sprouty homolog 4 (Drosophila)	38	7	856	108	22.5263	0	0.0343782
GATCCCAGCTTATGGCC	s	Th	1	SPSB1	SplA/ryanodine receptor domain and SOCS box containing 1	5	2	143	30	28.6	2.03132e-10	0.0343782
GATCTCAGAGAAGCTGT	s	Th	1	SPTBN2	Spectrin, beta, non-erythrocytic 2	0	0	49	6	#DIV/0!	7.2386e-05	0.0512997
GATCTTACTTCGTTGAC	s	Th	1	SPTLC2	Serine palmitoyltransferase, long chain base subunit 2	5	5	66	8	13.2	7.72305e-05	0.0508427
GATCAAAGCAAAGAGCG	s	Th	1	SQRDL	Sulfide quinone reductase-like (yeast)	5	5	95	6	19	6.16204e-07	0.0343782
GATCCCCCAGAGTCCCC	s	T	1	SRA1	Steroid receptor RNA activator 1	40	12	319	0	7.975	8.88178e-16	0.0343782
GATCCCCTCAGCTAAGT	s	T	5	SRGAP3	SLIT-ROBO Rho GTPase activating protein 3	0	0	45	12	#DIV/0!	0.000248529	0.0620318
GATCACCTTCGACGACT	s	Th	1	SRI	Sorcin	106	3	225	34	2.12264	0.000218303	0.0723072
GATCGGCTTCATGCTGT	s	T	1	SRM	Spermidine synthase	80	23	343	35	4.2875	2.64411e-12	0.0343782
GATCAGCACTGTGGTGA	s	T	1	SRP14	Signal recognition particle 14kDa (homologous Alu RNA binding protein)	627	22	874	34	1.39394	0.000580193	0.0971872
GATCAGATTGGAAAAGG	s	Th	1	SRP72	Signal recognition particle 72kDa	0	0	36	39	#DIV/0!	0.000678084	0.096944
GATCAGCCGAGGTCTCC	s	Th	5	SRRM2	Serine/arginine repetitive matrix 2	0	0	36	4	#DIV/0!	0.000678084	0.096944
GATCTGTGGAGTGACTG	s	T	2	SRrp35	Serine-arginine repressor protein (35 kDa)	0	0	80	11	#DIV/0!	7.02724e-07	0.0343782
GATCCTGGAGAGCTCCC	s	Th	1	SSNA1	Sjogren syndrome nuclear autoantigen 1	53	1	271	46	5.11321	7.6501e-12	0.0343782
GATCCTGCCCTGCTCTC	s	T	1	SSR2	Signal sequence receptor, beta (translocon-associated protein beta)	55	9	329	20	5.98182	3.41949e-14	0.0343782
GATCCAGTCAGGGTGGG	s	T	1	ST3GAL4	ST3 beta-galactoside alpha-2,3-sialyltransferase 4	50	9	149	41	2.98	0.000149274	0.0606868
GATCATGGGACCCTCTC	s	T	1	ST6GAL1	ST6 beta-galactosamide alpha-2,6-sialyltranferase 1	45	10	150	39	3.33333	4.85806e-05	0.043986
GATCAGACAGCAGTCCA	s	Th	1	ST6GALNAC2	ST6 (alpha-N-acetyl-neuraminyl-2,3-beta-galactosyl-1,3)-N-acetylgalactosaminide alpha-2,6-sialyltransferase 2	0	0	67	0	#DIV/0!	2.66252e-06	0.0343782
GATCTGAGAGAAGCCCT	s	Th	1	ST7	Suppression of tumorigenicity 7	0	0	38	12	#DIV/0!	0.000386126	0.0922803
GATCCTCACAGTCAAGT	s	T	1	STAB1	Stabilin 1	10	7	136	32	13.6	9.54184e-09	0.0343782
GATCCCCGTGTTACTGC	s	T	1	STAT1	Signal transducer and activator of transcription 1, 91kDa	0	0	91	26	#DIV/0!	1.23675e-07	0.0343782
GATCAGAGTTTCTGTGG	s	Th	1	STAT3	Signal transducer and activator of transcription 3 (acute-phase response factor)	0	0	36	3	#DIV/0!	0.000678084	0.096944
GATCAAGCTGGGGCACT	s	Th	4	STAT5B	Signal transducer and activator of transcription 5B	0	0	79	20	#DIV/0!	5.183e-07	0.0343782
GATCCAGGCTCGTAGAG	s	T	1	STAT5B	Signal transducer and activator of transcription 5B	96	13	264	31	2.75	1.86494e-06	0.0343782
GATCCCCAACCCCGGTG	s	T	1	STEAP3	STEAP family member 3	0	0	50	12	#DIV/0!	7.58015e-05	0.0512997
GATCCTGTGTGTAACCC	s	T	1	STK32B	Serine/threonine kinase 32B	13	4	91	0	7	2.58011e-05	0.0406889
GATCAAGGCTGCCGAGT	s	Th	2	STK40	Serine/threonine kinase 40	0	0	34	1	#DIV/0!	0.000678084	0.096944
GATCCAAAAGGCCATTG	s	Th	3	STMN4	Stathmin-like 4	3	3	51	6	17	0.000184457	0.0693882
GATCCAGAGTAAATGAG	s	Th	1	STX12	Syntaxin 12	0	0	75	14	#DIV/0!	8.93539e-07	0.0343782
GATCCCCCACCCCTTGC	s	Th	2	STX5	Syntaxin 5	31	24	102	19	3.29032	0.000589326	0.0742493
GATCTCAACACAGACCC	s	Th	1	SULF2	Sulfatase 2	6	6	164	79	27.3333	8.30092e-12	0.0343782
GATCATCTGAGCCTAGG	s	T	5	SULT1A2	Sulfotransferase family, cytosolic, 1A, phenol-preferring, member 2	3	0	43	3	14.3333	0.00112264	0.0961818
GATCCACCCACCTCTGT	s	T	5	SULT2B1	Sulfotransferase family, cytosolic, 2B, member 1	0	0	65	23	#DIV/0!	7.21998e-06	0.0343782
GATCTGGCTCTTCTTGT	s	Th	1	SUPT3H	Suppressor of Ty 3 homolog (S. cerevisiae)	0	0	74	6	#DIV/0!	8.93539e-07	0.0343782
GATCTCGAGCGTTTATC	s	Th	1	SUZ12	Suppressor of zeste 12 homolog (Drosophila)	0	0	46	50	#DIV/0!	0.000126201	0.0620318
GATCCTGACCTCCTCCA	s	Th	1	SYNJ2BP	Synaptojanin 2 binding protein	41	5	151	41	3.68293	7.31151e-06	0.0388462
GATCCATACGTCAAGGT	s	T	1	SYT5	Synaptotagmin V	0	0	63	65	#DIV/0!	1.29653e-05	0.0388462
GATCCCGGGCTGTAACT	s	Th	1	SYTL4	Synaptotagmin-like 4 (granuphilin-a)	0	0	41	15	#DIV/0!	0.000220483	0.0725022
GATCATTTGAGCCCGGG	s	T	3	TACC3	Transforming, acidic coiled-coil containing protein 3	0	0	82	84	#DIV/0!	7.02724e-07	0.0343782
GATCTGACCTCCACGGA	s	T	1	TACC3	Transforming, acidic coiled-coil containing protein 3	15	4	84	0	5.6	0.000212415	0.0610295
GATCATGGCTGCCCGGC	s	T	1	TADA3L	Transcriptional adaptor 3 (NGG1 homolog, yeast)-like	68	1	297	7	4.36765	1.16859e-10	0.0343782
GATCCCTAACTCGAAGC	s	Th	3	TAF11	TAF11 RNA polymerase II, TATA box binding protein (TBP)-associated factor, 28kDa	0	0	62	2	#DIV/0!	7.965e-06	0.0388462
GATCAAGCCATATTCAG	s	Th	1	TAF9	TAF9 RNA polymerase II, TATA box binding protein (TBP)-associated factor, 32kDa	9	3	71	9	7.88889	8.75414e-05	0.0622268
GATCCCACCCCAGGCCT	s	T	1	TAGLN2	Transgelin 2	32	4	113	48	3.53125	0.000268501	0.0692977
GATCCGCAAGTTTGCCG	s	T	4	TALDO1	Transaldolase 1	0	0	50	7	#DIV/0!	7.58015e-05	0.0512997
GATCCGTTTACAGCACC	s	Th	1	TAOK3	TAO kinase 3	17	1	107	13	6.29412	7.58293e-06	0.0388462
GATCCGCCGGGGAACAA	s	Th	4	TAOK3	TAO kinase 3	5	5	59	1	11.8	0.000226409	0.0630416
GATCTTGGCCCAGCAGA	s	Th	3	TAOK3	TAO kinase 3	0	0	36	34	#DIV/0!	0.000678084	0.096944
GATCACAACTCCTTACC	s	Th	5	TASP1	Taspase, threonine aspartase, 1	0	0	56	12	#DIV/0!	2.39413e-05	0.043986
GATCAGGGTCAGTCTTT	s	Th	1	TAX1BP1	Tax1 (human T-cell leukemia virus type I) binding protein 1	39	3	149	7	3.82051	7.31151e-06	0.0388462
GATCATGCAGGAGGCCT	s	T	1	TBC1D10A	TBC1 domain family, member 10A	0	0	35	1	#DIV/0!	0.000824106	0.096944
GATCCCATGCCAGTGTG	s	Th	5	TBC1D14	TBC1 domain family, member 14	3	3	75	14	25	4.00493e-06	0.0343782
GATCACAAAGCCAACCA	s	Th	1	TBC1D3C	TBC1 domain family, member 3C	109	7	280	16	2.56881	9.31582e-07	0.0343782
GATCAAGACCGGCGTGG	s	Th	2	TBCA	Tubulin folding cofactor A	56	11	195	13	3.48214	6.63114e-07	0.0343782
GATCAGATTCTGGGGGC	s	Th	1	TBX3	T-box 3 (ulnar mammary syndrome)	0	0	46	10	#DIV/0!	0.000126201	0.0620318
GATCTCATGTGGCCACA	s	Th	2	TCEA2	Transcription elongation factor A (SII), 2	3	3	67	3	22.3333	1.1906e-05	0.0388462
GATCCTCCACCAGGCGG	s	T	2	TCF4	Transcription factor 4	368	35	1129	137	3.06793	0	0.0343782
GATCGCTCTCGCCCACC	s	Th	4	TCF7L2	Transcription factor 7-like 2 (T-cell specific, HMG-box)	0	0	89	13	#DIV/0!	1.01597e-07	0.0343782
GATCCTTGGGCGGAGGT	s	T	2	TCF7L2	Transcription factor 7-like 2 (T-cell specific, HMG-box)	2	2	197	55	98.5	6.43929e-14	0.0343782
GATCCCCTGAGCAGCAC	s	T	1	TCHP	Trichoplein, keratin filament binding	28	7	93	13	3.32143	0.00210261	0.0977428
GATCCATCAGCCCTCAG	s	T	1	TCTN3	Tectonic family member 3	25	9	145	19	5.8	8.95649e-07	0.0343782
GATCCACTCGGCCAACC	s	T	1	TDRD3	Tudor domain containing 3	48	10	156	15	3.25	6.19346e-05	0.0435195
GATCGCTTGAACCCAAG	s	Th	5	TERF1	Telomeric repeat binding factor (NIMA-interacting) 1	0	0	57	0	#DIV/0!	1.38001e-05	0.0406889
GATCCACCCTGGCGGGG	s	T	1	TETRAN	Tetracycline transporter-like protein	234	28	767	55	3.27778	0	0.0343782
GATCTGCTCAGCCCCCT	s	T	4	TETRAN	Tetracycline transporter-like protein	15	9	98	19	6.53333	2.52682e-05	0.0388462
GATCTGGCTCATGGGGC	s	Th	1	TFAP2E	Transcription factor AP-2 epsilon (activating enhancer binding protein 2 epsilon)	11	11	74	3	6.72727	0.000154291	0.0606306
GATCAAGTGGATTGGTC	s	Th	1	TFDP1	Transcription factor Dp-1	11	2	77	4	7	9.24878e-05	0.0505712
GATCCTAGGATGCGTCC	s	Th	1	TFDP2	Transcription factor Dp-2 (E2F dimerization partner 2)	6	0	61	6	10.1667	0.000132225	0.0609844
GATCCAGTGACCCGGGA	s	T	4	TFF1	Trefoil factor 1	2	2	76	8	38	5.79806e-06	0.0343782
GATCTGCCATACCACTG	s	Th	1	TGIF1	TGFB-induced factor homeobox 1	0	0	82	13	#DIV/0!	3.00871e-07	0.0343782
GATCACAGCCTCCAGGG	s	Th	1	TGM2	Transglutaminase 2 (C polypeptide, protein-glutamine-gamma-glutamyltransferase)	0	0	43	40	#DIV/0!	0.000220483	0.0696973
GATCCAGCTTGCCAGGG	s	T	1	THAP11	THAP domain containing 11	111	7	262	52	2.36036	2.7728e-05	0.0406889
GATCTTCCCAATCAGCA	s	T	1	THAP2	THAP domain containing, apoptosis associated protein 2	3	3	48	1	16	0.000621641	0.0718638
GATCCCACCAGACCCCC	s	Th	1	THAP7	THAP domain containing 7	0	0	61	23	#DIV/0!	7.965e-06	0.0388462
GATCAAGCGGAAAGAGT	s	Th	1	THBS1	Thrombospondin 1	3	3	56	4	18.6667	0.000106388	0.0600848
GATCTTATCTAGCCTTT	s	Th	1	THEX1	Three prime histone mRNA exonuclease 1	0	0	46	0	#DIV/0!	0.000126201	0.0620318
GATCTTGCCCTTCCTCT	s	Th	3	THOC2	THO complex 2	2	2	43	10	21.5	0.00096987	0.0961818
GATCGCTCTGGTCGCAG	s	T	1	THOC4	THO complex 4	43	2	199	57	4.62791	4.35737e-08	0.0343782
GATCCTAAGCCATAGAC	s	T	1	THOC7	THO complex 7 homolog (Drosophila)	43	5	147	13	3.4186	3.7418e-05	0.043986
GATCCCATCCTCCCCGG	s	Th	2	THRA	Thyroid hormone receptor, alpha (erythroblastic leukemia viral (v-erb-a) oncogene homolog, avian)	2	2	44	41	22	0.000556847	0.0920388
GATCTCTTTTCCCCTGT	s	T	2	THRAP3	Thyroid hormone receptor associated protein 3	0	0	59	10	#DIV/0!	2.33168e-05	0.0406889
GATCCCAGAACCATGAA	s	T	4	THY1	Thy-1 cell surface antigen	5	2	50	7	10	0.00124208	0.0931773
GATCGTGAAAGAGGCTT	s	T	1	THYN1	Thymocyte nuclear protein 1	30	8	110	3	3.66667	0.000200625	0.0621346
GATCAGGGCATGCAACC	s	Th	1	TIA1	TIA1 cytotoxic granule-associated RNA binding protein	16	7	100	6	6.25	7.44555e-06	0.0388462
GATCCCGGAGTGGTAGC	s	T	3	TIMM10	Translocase of inner mitochondrial membrane 10 homolog (yeast)	22	1	130	8	5.90909	2.72353e-06	0.0343782
GATCTGTCTGCCTTCCT	s	T	1	TIMM50	Translocase of inner mitochondrial membrane 50 homolog (S. cerevisiae)	12	2	80	37	6.66667	0.000132602	0.0521146
GATCAAGATGACCAAGA	s	Th	1	TIMP1	TIMP metallopeptidase inhibitor 1	6	6	120	9	20	8.52371e-09	0.0343782
GATCCACACACGTTGGT	s	T	1	TIMP2	TIMP metallopeptidase inhibitor 2	297	10	622	143	2.09428	8.15517e-09	0.0343782
GATCTGGTAGGGGAGAA	s	T	3	TIMP4	TIMP metallopeptidase inhibitor 4	0	0	71	31	#DIV/0!	4.02592e-06	0.0343782
GATCGCCCAGGCTGGAG	s	Th	4	TK1	Thymidine kinase 1, soluble	0	0	39	13	#DIV/0!	0.000386126	0.0725022
GATCACGCCTTGCCCAA	s	Th	3	TLE1	Transducin-like enhancer of split 1 (E(sp1) homolog, Drosophila)	86	14	253	17	2.94186	4.8349e-07	0.0343782
GATCTCGTTAGATTGCA	s	Th	1	TLE1	Transducin-like enhancer of split 1 (E(sp1) homolog, Drosophila)	0	0	48	52	#DIV/0!	7.2386e-05	0.0602665
GATCCTGCACGTCCGCA	s	Th	1	TLE2	Transducin-like enhancer of split 2 (E(sp1) homolog, Drosophila)	59	15	399	50	6.76271	0	0.0343782
GATCCAGGAAGTTGGTG	s	T	4	TLOC1	Translocation protein 1	129	15	488	80	3.78295	3.9968e-15	0.0343782
GATCTGCTCACCCTCGG	s	T	1	TMED3	Transmembrane emp24 protein transport domain containing 3	60	9	184	16	3.06667	1.36647e-05	0.0388462
GATCAGCCACTTGCTGA	s	Th	1	TMED4	Transmembrane emp24 protein transport domain containing 4	0	0	39	0	#DIV/0!	0.000386126	0.0725022
GATCAGGCCCAGGAAGG	s	Th	1	TMEM101	Transmembrane protein 101	9	9	82	10	9.11111	1.80675e-05	0.0435195
GATCAGAGCTTCACTTA	s	Th	1	TMEM103	Transmembrane protein 103	0	0	44	5	#DIV/0!	0.000126201	0.0620318
GATCTAACTACAGCAGG	s	Th	4	TMEM108	Transmembrane protein 108	0	0	52	1	#DIV/0!	4.15955e-05	0.0503822
GATCCCCAGTGGGCCCT	s	T	1	TMEM111	Transmembrane protein 111	12	5	97	25	8.08333	1.49083e-05	0.0343782
GATCCTGCAGCCTGTGG	s	T	1	TMEM115	Transmembrane protein 115	56	2	149	19	2.66071	0.000511411	0.0711841
GATCTGCTCCTTCGGTG	s	Th	3	TMEM121	Transmembrane protein 121	12	0	251	9	20.9167	0	0.0343782
GATCCCCACAGGAACTG	s	T	1	TMEM133	Transmembrane protein 133	0	0	137	4	#DIV/0!	1.25182e-10	0.0343782
GATCCCGCAGCAGCCAA	s	T	1	TMEM159	Transmembrane protein 159	0	0	84	15	#DIV/0!	3.93488e-07	0.0343782
GATCGGGAGGAACTGTA	s	Th	1	TMEM8	Transmembrane protein 8 (five membrane-spanning domains)	5	1	51	2	10.2	0.000663967	0.0931773
GATCGGGAGGACTGTGG	s	Th	1	TMEM93	Transmembrane protein 93	84	6	212	5	2.52381	2.71088e-05	0.0444611
GATCGACCTGCCGCCCA	s	Th	3	TMEPAI	Transmembrane, prostate androgen induced RNA	0	0	79	42	#DIV/0!	5.183e-07	0.0343782
GATCGCCTCCCAACAGC	s	Th	1	TMSL8	Thymosin-like 8	0	0	79	3	#DIV/0!	5.183e-07	0.0343782
GATCATGCCAGGGCAAC	s	T	3	TncRNA	Trophoblast-derived noncoding RNA	0	0	48	49	#DIV/0!	0.000137089	0.0602665
GATCGCCTTCCAACCCC	s	T	3	TNFRSF1A	Tumor necrosis factor receptor superfamily, member 1A	81	2	295	24	3.64198	2.67354e-09	0.0343782
GATCAAGTACAAGATGC	s	Th	1	TNKS	Tankyrase, TRF1-interacting ankyrin-related ADP-ribose polymerase	12	6	67	4	5.58333	0.000427211	0.0926416
GATCTGTCAGAACAGGC	s	Th	1	TNS1	Tensin 1	0	0	51	9	#DIV/0!	4.15955e-05	0.0512997
GATCTGTGACAGCAGCA	s	Th	1	TOB1	Transducer of ERBB2, 1	33	4	112	14	3.39394	0.000326972	0.0692977
GATCCCAAATCCAAAGC	s	T	2	TOMM20	Translocase of outer mitochondrial membrane 20 homolog (yeast)	7	0	95	3	13.5714	1.30309e-06	0.0343782
GATCTCACTTTCCCCTT	s	Th	1	TOMM22	Translocase of outer mitochondrial membrane 22 homolog (yeast)	6	6	151	11	25.1667	6.99312e-11	0.0343782
GATCCTGTGAAGGCCTG	s	T	1	TOP2A	Topoisomerase (DNA) II alpha 170kDa	0	0	141	0	#DIV/0!	7.06593e-11	0.0343782
GATCCAGGAGCTTGAGG	s	T	1	TOP3B	Topoisomerase (DNA) III beta	0	0	124	36	#DIV/0!	6.97537e-10	0.0343782
GATCCTCCTGCAGGAGC	s	T	1	TOR2A	Torsin family 2, member A	17	16	80	15	4.70588	0.000359438	0.0736103
GATCCTTGGGTTGTGAA	s	T	1	TOX4	TOX high mobility group box family member 4	0	0	43	1	#DIV/0!	0.000248529	0.0696973
GATCAAGGTCCTTTCCG	s	Th	1	TPM1	Tropomyosin 1 (alpha)	2	2	64	7	32	2.05542e-05	0.043986
GATCCAACTGAAAGAGC	s	Th	5	TPM1	Tropomyosin 1 (alpha)	0	0	52	16	#DIV/0!	4.15955e-05	0.0503822
GATCCCGCATGCCTGAA	s	T	1	TPM1	Tropomyosin 1 (alpha)	46	5	123	16	2.67391	0.00157586	0.0972189
GATCAAACTGTTGGAGG	s	Th	1	TPM2	Tropomyosin 2 (beta)	20	1	169	15	8.45	1.47739e-09	0.0343782
GATCCTGACAACCCCCA	s	T	3	TPP1	Tripeptidyl peptidase I	2	2	48	21	24	0.000621641	0.0718638
GATCCTGTAAGCAGACT	s	T	1	TPST1	Tyrosylprotein sulfotransferase 1	46	1	126	10	2.73913	0.00103842	0.0932084
GATCCCTTTGCTGTGAG	s	T	1	TPX2	TPX2, microtubule-associated, homolog (Xenopus laevis)	0	0	58	15	#DIV/0!	2.33168e-05	0.0406889
GATCTGATTTTTTCCCC	s	T	1	TRAF4	TNF receptor-associated factor 4	3	3	87	0	29	1.02155e-06	0.0343782
GATCAGCAAACACGATA	s	T	1	TRAF7	TNF receptor-associated factor 7	13	3	84	0	6.46154	7.69615e-05	0.0508427
GATCTTTTGTCCTCACT	s	T	1	TRAFD1	TRAF-type zinc finger domain containing 1	12	2	98	11	8.16667	8.60426e-06	0.0343782
GATCCGTGCCCGCCTCC	s	T	1	TRIM28	Tripartite motif-containing 28	350	32	685	111	1.95714	2.19474e-08	0.0343782
GATCAGCTGCCGGTATG	s	T	1	TRIO	Triple functional domain (PTPRF interacting)	91	25	223	31	2.45055	8.05289e-05	0.0444611
GATCCGAGGGGTCCTGA	s	T	1	TRMT1	TRM1 tRNA methyltransferase 1 homolog (S. cerevisiae)	30	5	124	10	4.13333	2.83672e-05	0.043986
GATCCGGGAACTGGCGG	s	T	1	TSC22D4	TSC22 domain family, member 4	65	2	2765	209	42.5385	0	0.0343782
GATCCCACACTGCAGCT	s	Th	1	TSHZ3	Teashirt zinc finger homeobox 3	3	3	49	24	16.3333	0.000320249	0.0693882
GATCGTTGAAACCCTGT	s	T	1	TSPAN6	Tetraspanin 6	8	1	69	15	8.625	0.000233603	0.0602665
GATCCCTCCAGCTGTGG	s	Th	1	TSSC4	Tumor suppressing subtransferable candidate 4	19	2	121	6	6.36842	1.01715e-06	0.0343782
GATCCTGCATCCCACTC	s	T	1	TSTA3	Tissue specific transplantation antigen P35B	12	1	104	42	8.66667	4.96066e-06	0.0343782
GATCAGTCCCTTGAAAT	s	Th	4	TTC3	Tetratricopeptide repeat domain 3	6	3	133	19	22.1667	1.00668e-09	0.0343782
GATCAGTTTGCAGCAGC	s	Th	1	TTC3	Tetratricopeptide repeat domain 3	472	73	782	27	1.65678	7.84775e-07	0.0343782
GATCACAAGTGGGCAGT	s	Th	4	TTF1	Transcription termination factor, RNA polymerase I	5	2	62	25	12.4	0.000132225	0.0521146
GATCCCCAACAACGTGA	s	Th	1	TUBB3	Tubulin, beta 3	181	175	1005	19	5.55249	0	0.0343782
GATCATATTCTGGCTAT	s	Th	5	TUG1	Taurine upregulated gene 1	0	0	130	8	#DIV/0!	9.18552e-11	0.0343782
GATCCAACCGTGCCTGA	s	Th	1	TUG1	Taurine upregulated gene 1	119	17	310	6	2.60504	1.74362e-07	0.0343782
GATCCCCCCACACCCCC	s	Th	4	TXN	Thioredoxin	0	0	256	3	#DIV/0!	0	0.0343782
GATCCGGGGACCGCTGT	s	T	1	TXN2	Thioredoxin 2	166	23	304	29	1.83133	0.000594207	0.0921288
GATCCAGCGGAGAGTGG	s	T	1	TXNDC12	Thioredoxin domain containing 12 (endoplasmic reticulum)	111	6	282	31	2.54054	4.24113e-06	0.0343782
GATCGCTTCAGCCCGGG	s	T	5	TXNDC13	Thioredoxin domain containing 13	0	0	39	40	#DIV/0!	0.000451822	0.0725022
GATCGAACACTGGAAAC	s	Th	1	TXNDC15	Thioredoxin domain containing 15	52	3	148	12	2.84615	0.000177722	0.0631075
GATCAAGATGCCGAACC	s	Th	1	TXNIP	Thioredoxin interacting protein	0	0	69	2	#DIV/0!	2.66252e-06	0.0343782
GATCAGAACCTCCAAAT	s	Th	1	TXNIP	Thioredoxin interacting protein	9	9	69	2	7.66667	0.000147937	0.0699457
GATCTGGGCGATTCTGA	s	Th	1	U2AF1	U2 small nuclear RNA auxiliary factor 1	116	23	264	17	2.27586	1.58687e-05	0.043986
GATCTGCCGCAAGTGCT	s	Th	1	UBA52	Ubiquitin A-52 residue ribosomal protein fusion product 1	631	9	1207	34	1.91284	4.75175e-14	0.0343782
GATCCCAGGACTTTGGG	s	T	5	UBA6	Ubiquitin-activating enzyme E1-like 2	0	0	58	3	#DIV/0!	2.33168e-05	0.0406889
GATCCCCCCGAAGTCTT	s	T	1	UBC	Ubiquitin C	80	3	240	37	3	1.05041e-06	0.0343782
GATCTTTGCTGGGAAAC	s	T	1	UBC	Ubiquitin C	1256	122	1816	99	1.44586	6.83946e-08	0.0343782
GATCACGTCCTGTTTTG	s	Th	1	UBC	Ubiquitin C	9	0	87	18	9.66667	6.29439e-06	0.0388462
GATCTGCAGTCTTCCTG	s	T	1	UBE2D4	Ubiquitin-conjugating enzyme E2D 4 (putative)	0	0	74	21	#DIV/0!	2.24757e-06	0.0343782
GATCGGGAGAGGGAGGA	s	Th	1	UBE2G2	Ubiquitin-conjugating enzyme E2G 2 (UBC7 homolog, yeast)	183	20	392	9	2.14208	1.02567e-06	0.0343782
GATCTGCTGGTCCTTGC	s	Th	1	UBE2L3	Ubiquitin-conjugating enzyme E2L 3	6	6	61	3	10.1667	0.000132225	0.0609844
GATCCTCGGCATAGCGG	s	T	1	UBE2L6	Ubiquitin-conjugating enzyme E2L 6	48	7	132	25	2.75	0.000820486	0.0741422
GATCCACGGGGGCGCCG	s	T	1	UBE2S	Ubiquitin-conjugating enzyme E2S	284	23	678	20	2.38732	7.70251e-12	0.0343782
GATCTAACGCCACACCT	s	T	1	UBQLN1	Ubiquilin 1	45	10	206	10	4.57778	3.86474e-08	0.0343782
GATCCCAGCTCCACTGC	s	Th	2	UBR4	Ubiquitin protein ligase E3 component n-recognin 4	0	0	85	0	#DIV/0!	1.74778e-07	0.0343782
GATCCAGAGAGCTTCCT	s	T	1	UBR4	Ubiquitin protein ligase E3 component n-recognin 4	75	5	251	44	3.34667	1.44304e-07	0.0343782
GATCTCGGCTGCCGTCT	s	Th	1	UBTF	Upstream binding transcription factor, RNA polymerase I	0	0	56	19	#DIV/0!	2.39413e-05	0.043986
GATCGGCAGTCGCTGGC	s	T	2	UBTF	Upstream binding transcription factor, RNA polymerase I	124	10	273	10	2.20161	6.3137e-05	0.043986
GATCCTCCCTCCTGCGT	s	T	1	UCK1	Uridine-cytidine kinase 1	37	8	291	58	7.86486	1.24345e-14	0.0343782
GATCCGTAGCAACCGGG	s	T	2	ULK3	Unc-51-like kinase 3 (C. elegans)	0	0	85	9	#DIV/0!	3.93488e-07	0.0343782
GATCTGCTTCCACGCTG	s	T	3	UNC13D	Unc-13 homolog D (C. elegans)	2	2	52	14	26	0.000344869	0.0615627
GATCCTTTTTCCTTCAG	s	T	1	UNC84A	Unc-84 homolog A (C. elegans)	73	7	273	48	3.73973	4.49244e-09	0.0343782
GATCAGTACTGGCTCTG	s	Th	5	UNKL	Unkempt homolog (Drosophila)-like	0	0	39	6	#DIV/0!	0.000386126	0.0725022
GATCAGTGTGAGTCCTG	s	Th	1	UPF3A	UPF3 regulator of nonsense transcripts homolog A (yeast)	100	22	218	14	2.18	0.000169249	0.0705426
GATCCGTAGCGGCATGT	s	T	1	UQCRC1	Ubiquinol-cytochrome c reductase core protein I	229	19	603	66	2.63319	1.98197e-12	0.0343782
GATCCGCATCGACTTGG	s	T	3	URP2	UNC-112 related protein 2	8	1	59	13	7.375	0.00123121	0.0919382
GATCCTTCCCAGGAGGT	s	Th	5	USP47	Ubiquitin specific peptidase 47	0	0	84	2	#DIV/0!	1.74778e-07	0.0343782
GATCCCAGTGACGTGGA	s	Th	1	USP9X	Ubiquitin specific peptidase 9, X-linked	33	3	153	13	4.63636	8.93867e-07	0.0343782
GATCCTTGGTCCCGCCA	s	T	4	VANGL2	Vang-like 2 (van gogh, Drosophila)	0	0	56	6	#DIV/0!	4.2002e-05	0.043986
GATCCTGTTTCCCACCT	s	T	1	VAT1	Vesicle amine transport protein 1 homolog (T. californica)	32	10	204	62	6.375	1.52037e-09	0.0343782
GATCAATGCATTTCATA	s	Th	1	VCAN	Versican	0	0	36	16	#DIV/0!	0.000678084	0.096944
GATCTGCCCTCCTCTGC	s	Th	5	VCPIP1	Valosin containing protein (p97)/p47 complex interacting protein 1	0	0	43	3	#DIV/0!	0.000220483	0.0696973
GATCCCCTGGCTCCCCA	s	T	1	VEGFA	Vascular endothelial growth factor A	93	13	1320	218	14.1935	0	0.0343782
GATCCACGTGCCCATTG	s	T	1	VEGFA	Vascular endothelial growth factor A	8	1	78	17	9.75	7.66289e-05	0.0406889
GATCGGGAGGAGGACGA	s	Th	1	VGF	VGF nerve growth factor inducible	453	28	1450	79	3.20088	0	0.0343782
GATCCTGCTGGCCGAGC	s	Th	1	VIM	Vimentin	703	13	3689	149	5.24751	0	0.0343782
GATCCGAAGGAACTGTA	s	Th	3	WBSCR18	Williams Beuren syndrome chromosome region 18	30	3	118	12	3.93333	6.34279e-05	0.0510659
GATCCAAGATGCACACC	s	T	1	WDR1	WD repeat domain 1	10	0	104	2	10.4	1.51475e-06	0.0343782
GATCAAGAACTATTTGG	s	Th	1	WDR22	WD repeat domain 22	0	0	36	3	#DIV/0!	0.000678084	0.096944
GATCCAGATGATAAACC	s	T	1	WDR26	WD repeat domain 26	0	0	35	36	#DIV/0!	0.000824106	0.096944
GATCAAGCAAACCCAGG	s	Th	3	WDR34	WD repeat domain 34	47	11	156	16	3.31915	1.34895e-05	0.0435195
GATCCTCAACTGCCAAA	s	Th	1	WDR85	WD repeat domain 85	22	4	149	16	6.77273	3.10221e-08	0.0343782
GATCCTTGTGTGGGAGG	s	T	1	WDR90	WD repeat domain 90	3	3	89	35	29.6667	1.02155e-06	0.0343782
GATCCAGGCTGGGGAAG	s	T	1	WIBG	Within bgcn homolog (Drosophila)	37	2	110	4	2.97297	0.000864992	0.0972525
GATCAGGAGTACCTGCC	s	Th	1	WRNIP1	Werner helicase interacting protein 1	87	9	236	5	2.71264	3.40479e-06	0.0343782
GATCAAGCCTTGCTTGA	s	Th	1	WSCD1	WSC domain containing 1	0	0	90	5	#DIV/0!	5.90933e-08	0.0343782
GATCCGGGAGGCCCTGG	s	T	3	WSCD1	WSC domain containing 1	22	3	85	24	3.86364	0.00122507	0.094873
GATCTTCTTGAGCTGTG	s	T	1	WWC1	WW and C2 domain containing 1	0	0	160	19	#DIV/0!	4.06697e-12	0.0343782
GATCACTGACAGCTGAA	s	Th	1	XIST	X (inactive)-specific transcript	0	0	116	1	#DIV/0!	7.88077e-10	0.0343782
GATCATTGTTGAGATGA	s	T	2	XIST	X (inactive)-specific transcript	3	3	345	33	115	0	0.0343782
GATCCAAGACCAAAACA	s	Th	3	XIST	X (inactive)-specific transcript	11	4	64	3	5.81818	0.000708748	0.0921634
GATCTGTCCACAGTGCC	s	T	1	XPR1	Xenotropic and polytropic retrovirus receptor	0	0	110	8	#DIV/0!	6.93007e-09	0.0343782
GATCTATGGGAGTCGTC	s	Th	4	XRCC6	X-ray repair complementing defective repair in Chinese hamster cells 6 (Ku autoantigen, 70kDa)	0	0	51	11	#DIV/0!	4.15955e-05	0.0512997
GATCCACCAGCTGAGAA	s	T	1	YBX1	Y box binding protein 1	249	3	1415	172	5.68273	0	0.0343782
GATCCTCAGTGTGCTCA	s	T	2	YIF1A	Yip1 interacting factor homolog A (S. cerevisiae)	53	12	356	33	6.71698	2.22045e-16	0.0343782
GATCCTGGACACACTGG	s	Th	1	YIPF3	Yip1 domain family, member 3	208	7	385	25	1.85096	4.46269e-05	0.0545859
GATCACTGGGAAACTGC	s	Th	2	YLPM1	YLP motif containing 1	2	2	77	11	38.5	2.32542e-06	0.0343782
GATCACAGATGAAAGTG	s	Th	1	YLPM1	YLP motif containing 1	5	1	51	14	10.2	0.000663967	0.0931773
GATCTAGCTGCTGACAT	s	T	1	ZBED5	Zinc finger, BED-type containing 5	0	0	104	24	#DIV/0!	2.19072e-08	0.0343782
GATCAAGTCCTGGAGTC	s	Th	1	ZBTB34	Zinc finger and BTB domain containing 34	0	0	46	10	#DIV/0!	0.000126201	0.0620318
GATCTATTGAAAGTCAG	s	Th	4	ZC3H7B	Zinc finger CCCH-type containing 7B	80	11	362	66	4.525	4.39648e-14	0.0343782
GATCGTCCAGGGCCTGG	s	Th	4	ZEB2	Zinc finger E-box binding homeobox 2	0	0	48	12	#DIV/0!	7.2386e-05	0.0602665
GATCCCTGCTATGGAGC	s	T	1	ZFP28	Zinc finger protein 28 homolog (mouse)	0	0	58	3	#DIV/0!	2.33168e-05	0.0406889
GATCTCAGCGGGGAGCC	s	Th	1	ZFP36	Zinc finger protein 36, C3H type, homolog (mouse)	97	6	377	24	3.8866	4.23661e-13	0.0343782
GATCTGAACCCCTGTTG	s	Th	4	ZFP36L1	Zinc finger protein 36, C3H type-like 1	36	15	108	11	3	0.000985191	0.0941481
GATCGATGAGCAGGACA	s	Th	3	ZMYND19	Zinc finger, MYND-type containing 19	6	0	56	4	9.33333	0.000387715	0.0705426
GATCACAACACCAGTAC	s	Th	1	ZMYND8	Zinc finger, MYND-type containing 8	89	27	228	30	2.5618	1.27625e-05	0.0388462
GATCTCTTTCCACCAAC	s	Th	1	ZNF135	Zinc finger protein 135	0	0	72	9	#DIV/0!	1.54173e-06	0.0343782
GATCTATGAAATGAGTG	s	Th	1	ZNF189	Zinc finger protein 189	0	0	54	11	#DIV/0!	2.39413e-05	0.043986
GATCCACCTTAACGACC	s	T	1	ZNF317	Zinc finger protein 317	5	1	50	23	10	0.00124208	0.0931773
GATCCCCAGATTCGAAG	s	T	4	ZNF32	Zinc finger protein 32	0	0	48	1	#DIV/0!	0.000137089	0.0602665
GATCAGCAAATAGAAGG	s	Th	3	ZNF326	Zinc finger protein 326	2	2	82	4	41	1.35116e-06	0.0343782
GATCACACACAGGGGAG	s	Th	3	ZNF33B	Zinc finger protein 33B	0	0	46	4	#DIV/0!	0.000126201	0.0620318
GATCCCCGGGGAGGCAG	s	T	1	ZNF362	Zinc finger protein 362	188	31	334	55	1.7766	0.000658346	0.0922264
GATCCGTGCTGCCACCC	s	T	3	ZNF384	Zinc finger protein 384	75	1	277	66	3.69333	6.02174e-09	0.0343782
GATCTTGGCCTCTCTTG	s	Th	4	ZNF404	Zinc finger protein 404	0	0	41	2	#DIV/0!	0.000220483	0.0725022
GATCCGGCCCCGCTTGC	s	T	1	ZNF414	Zinc finger protein 414	20	19	106	8	5.3	2.38351e-05	0.0406889
GATCCTCCATTGCTGAG	s	T	5	ZNF462	Zinc finger protein 462	0	0	61	38	#DIV/0!	1.29653e-05	0.0388462
GATCTGCAAGGCTGGCT	s	T	1	ZNF532	Zinc finger protein 532	143	9	310	39	2.16783	1.9015e-05	0.0406889
GATCCACCAGACCAGCC	s	T	1	ZNF545	Zinc finger protein 545	2	2	80	11	40	3.24793e-06	0.0343782
GATCTGGTCAAACACAG	s	T	1	ZNF553	Zinc finger protein 553	0	0	61	4	#DIV/0!	1.29653e-05	0.0388462
GATCCTACCGCAATCGG	s	Th	1	ZNF584	Zinc finger protein 584	19	2	89	0	4.68421	0.000146754	0.0704762
GATCCTACCTAAGGGGC	s	T	1	ZNF606	Zinc finger protein 606	17	3	76	26	4.47059	0.000606347	0.0967551
GATCCATCAGCGCGTGC	s	Th	2	ZNF777	Zinc finger protein 777	33	10	194	21	5.87879	2.81341e-09	0.0343782
GATCCGGCCAACAGAGC	s	T	4	ZNF791	Zinc finger protein 791	7	7	59	6	8.42857	0.000395706	0.0919382
GATCGTGCCATCCAGCC	s	Th	3	ZNF793	Zinc finger protein 793	0	0	39	0	#DIV/0!	0.000386126	0.0725022
GATCTGTTGTTGCTGAA	s	T	1	ZNF92	Zinc finger protein 92	7	0	72	22	10.2857	4.01493e-05	0.0503822
GATCCTTCATCCCAACA	s	T	1	ZNFX1	Zinc finger, NFX1-type containing 1	0	0	37	3	#DIV/0!	0.000824106	0.0922803
GATCGGCTTGAACTGGC	s	T	2	ZRF1	Zuotin related factor 1	3	3	113	8	37.6667	1.81743e-08	0.0343782
GATCCACACTGGGGAGA	s	T	1	ZSCAN21	Zinc finger and SCAN domain containing 21	20	3	85	2	4.25	0.000532593	0.0732594
GATCCCCGCCCTGGGGT	s	T	1	ZYX	Zyxin	282	59	527	211	1.86879	3.5737e-06	0.0343782
GATCTGCCTGAGGACAG	s	T	1	ZYX	Zyxin	80	30	206	23	2.575	4.40655e-05	0.0503822
GATCCACTGCTGTGCGT	s	T	1			0	0	65	3	#DIV/0!	7.21998e-06	0.0343782
GATCACTGCCTGCCCAT	s	Th	1			0	0	67	0	#DIV/0!	2.66252e-06	0.0343782
GATCTTGGCATGTGTCA	s	Th	1			0	0	67	7	#DIV/0!	2.66252e-06	0.0343782
GATCAGCCTAGCCAATG	s	T	3			0	0	67	10	#DIV/0!	7.21998e-06	0.0343782
GATCCAGTTTCTCTGCA	s	T	4			0	0	67	2	#DIV/0!	7.21998e-06	0.0343782
GATCGTGACTCCATCTC	s	T	1			0	0	71	9	#DIV/0!	4.02592e-06	0.0343782
GATCTAATAGGTCTGCA	s	Th	1			0	0	72	11	#DIV/0!	1.54173e-06	0.0343782
GATCCTCCCGCCTTTTC	s	T	4			0	0	72	4	#DIV/0!	2.24757e-06	0.0343782
GATCAAATCAGCTCGGC	s	Th	1			0	0	75	3	#DIV/0!	8.93539e-07	0.0343782
GATCAGCCTGCCTTGGT	s	T	1			0	0	76	15	#DIV/0!	1.25613e-06	0.0343782
GATCTGGACTCCGCACC	s	Th	3			0	0	77	1	#DIV/0!	5.183e-07	0.0343782
GATCTGTAGTCCAGGCT	s	Th	5			0	0	77	9	#DIV/0!	5.183e-07	0.0343782
GATCCTTCTGAATAGGA	s	T	1			0	0	85	13	#DIV/0!	3.93488e-07	0.0343782
GATCAAATGTAGGCTGG	s	Th	4			0	0	90	12	#DIV/0!	5.90933e-08	0.0343782
GATCATCTGGGGTCAGG	s	T	1			0	0	93	2	#DIV/0!	1.23675e-07	0.0343782
GATCATGCCACCGTGCT	s	T	4			0	0	97	24	#DIV/0!	6.94123e-08	0.0343782
GATCATTGTTACCACTG	s	T	3			0	0	102	18	#DIV/0!	2.19072e-08	0.0343782
GATCATTACTCTGCTCT	s	T	3			0	0	102	7	#DIV/0!	2.19072e-08	0.0343782
GATCTCTCCTCACTGCA	s	Th	4			0	0	103	50	#DIV/0!	6.79992e-09	0.0343782
GATCGTGCTTCTCCGAG	s	T	1			0	0	121	6	#DIV/0!	1.23759e-09	0.0343782
GATCATAAGAGTTAGCC	s	T	1			0	0	126	18	#DIV/0!	6.97537e-10	0.0343782
GATCATCAGGGGCAAGC	s	T	1			0	0	137	3	#DIV/0!	1.25182e-10	0.0343782
GATCAGCCCTGCCCTCC	s	T	5			0	0	143	58	#DIV/0!	3.98968e-11	0.0343782
GATCAGGAGTTCGAGAG	s	T	3			0	0	215	220	#DIV/0!	8.88178e-16	0.0343782
GATCCCTCCTGCTGCCA	s	T	1			2	2	74	17	37	1.03594e-05	0.0343782
GATCCTGCCATGCAGTG	s	Th	3			3	3	95	9	31.6667	1.5492e-07	0.0343782
GATCCCTGTGAGCTGGT	s	Th	1			3	3	79	26	26.3333	2.32542e-06	0.0343782
GATCTGGCTTGGCCCTG	s	Th	1			22	2	300	28	13.6364	0	0.0343782
GATCCAGACATGCCTGA	s	Th	1			19	2	248	11	13.0526	1.77636e-15	0.0343782
GATCCCAGGTACTTGGG	s	T	3			7	6	89	50	12.7143	4.08209e-06	0.0343782
GATCCTTCCTCCCCGCG	s	T	4			12	1	100	2	8.33333	8.60426e-06	0.0343782
GATCCCCAAGGCTGAGG	s	T	1			13	4	104	1	8	4.96066e-06	0.0343782
GATCAAGACTTGGAACC	s	Th	4			19	1	148	22	7.78947	1.73822e-08	0.0343782
GATCCTAAGACCACCAC	s	T	1			13	4	100	1	7.69231	8.60426e-06	0.0343782
GATCCAGGCCTGTGGCA	s	Th	1			17	2	123	12	7.23529	6.13639e-07	0.0343782
GATCCACCTGCCCTGAC	s	T	1			25	6	163	48	6.52	6.50402e-08	0.0343782
GATCACGGACGTGCAGC	s	Th	1			83	14	522	50	6.28916	0	0.0343782
GATCTGGGTGAAGGGGA	s	Th	1			84	3	477	4	5.67857	0	0.0343782
GATCTGTCCAACGCCTG	s	T	1			63	26	345	25	5.47619	3.04201e-14	0.0343782
GATCCAGGGCCGTTCAT	s	T	1			38	40	201	16	5.28947	1.76702e-08	0.0343782
GATCGCCTGAGCCCGGG	s	T	5			35	17	171	108	4.88571	4.05302e-07	0.0343782
GATCCCCGCCAGGGTGG	s	T	1			45	10	215	10	4.77778	1.43382e-08	0.0343782
GATCCCCCAGGCATCGT	s	T	1			45	3	212	17	4.71111	2.35616e-08	0.0343782
GATCGTGGGTTGCCGAG	s	Th	3			41	2	189	37	4.60976	2.90646e-08	0.0343782
GATCCTGGCTGGGAAGT	s	T	1			81	5	345	7	4.25926	6.0385e-12	0.0343782
GATCCTGGGTGACTTTG	s	T	1			66	3	271	16	4.10606	1.49259e-09	0.0343782
GATCCCCAGTGGATGCC	s	T	1			61	14	215	28	3.52459	7.67087e-07	0.0343782
GATCCCCGGTGGTTTTG	s	T	1			1177	84	3828	119	3.25234	0	0.0343782
GATCAGGACCACGGGAG	s	Th	2			72	9	230	21	3.19444	3.22498e-07	0.0343782
GATCCATCTGCCTTTGT	s	T	1			554	9	1749	238	3.15704	0	0.0343782
GATCTGCTGGGTCACCA	s	T	1			88	1	236	18	2.68182	9.87652e-06	0.0343782
GATCACTTGGGCCTGTA	s	Th	1			158	20	417	14	2.63924	1.71204e-09	0.0343782
GATCGGCGCCACTGCTG	s	T	1			0	0	61	23	#DIV/0!	1.29653e-05	0.0388462
GATCGCTTGAACCGAGG	s	Th	3			0	0	62	11	#DIV/0!	7.965e-06	0.0388462
GATCAGGGCAGCCAGGC	s	Th	5			0	0	64	20	#DIV/0!	4.60262e-06	0.0388462
GATCACCCCAGCCTGTG	s	Th	1			8	8	80	8	10	1.80675e-05	0.0388462
GATCACATCAGCCAGGC	s	Th	1			48	9	161	4	3.35417	1.78204e-05	0.0388462
GATCAGGCCCCACCTGC	s	Th	1			386	26	643	33	1.6658	8.10816e-06	0.0388462
GATCCTCAAGGTCCTTC	s	T	1			0	0	58	22	#DIV/0!	2.33168e-05	0.0406889
GATCCGCCCGACTCGGC	s	Th	1			0	0	59	21	#DIV/0!	1.38001e-05	0.0406889
GATCCGCCTGCCTCGGG	s	T	5			0	0	59	13	#DIV/0!	2.33168e-05	0.0406889
GATCCATACTGCTGACA	s	T	1			5	5	74	2	14.8	4.01493e-05	0.0406889
GATCACTTGTGGGCGGG	s	Th	1			25	1	118	11	4.72	1.16637e-05	0.0406889
GATCCTGTGGCCATAGA	s	T	1			0	0	54	19	#DIV/0!	4.2002e-05	0.043986
GATCTCGACAGTCGGGG	s	Th	1			0	0	56	9	#DIV/0!	2.39413e-05	0.043986
GATCAAATGGTGCTAAC	s	Th	1			0	0	56	15	#DIV/0!	2.39413e-05	0.043986
GATCTGTCACTGTTCCC	s	Th	1			0	0	52	3	#DIV/0!	4.15955e-05	0.0503822
GATCCTCCTCAAACACC	s	Th	1			0	0	52	21	#DIV/0!	4.15955e-05	0.0503822
GATCAGAATGGTCCCGG	s	Th	4			0	0	52	1	#DIV/0!	4.15955e-05	0.0503822
GATCCCTCCGCGGAAAA	s	Th	1			2	2	61	4	30.5	3.55173e-05	0.0503822
GATCCCCTCCAGGTAGC	s	Th	1			9	0	79	0	8.77778	3.05902e-05	0.0505712
GATCGTGACCGTGACCG	s	Th	1			714	14	1038	92	1.45378	1.44162e-05	0.0505712
GATCACTTAGGCTGTGG	s	Th	1			14	5	87	31	6.21429	5.62863e-05	0.0510659
GATCTTGTTCGAGTAGA	s	Th	1			17	5	93	11	5.47059	5.51162e-05	0.0510659
GATCTGCCCGTTTCGGC	s	Th	1			0	0	49	7	#DIV/0!	7.2386e-05	0.0512997
GATCCCAGGAGTTCTAG	s	T	4			0	0	50	10	#DIV/0!	7.58015e-05	0.0512997
GATCAAGACCAGCCTAG	s	Th	3			0	0	51	6	#DIV/0!	4.15955e-05	0.0512997
GATCCCAGCTGCTGGGG	s	Th	4			0	0	51	14	#DIV/0!	4.15955e-05	0.0512997
GATCACGGGGAGAGGCG	s	Th	1			2	2	57	4	28.5	6.1436e-05	0.0512997
GATCCAGCCTGATGCCC	s	T	1			10	4	74	2	7.4	0.000133863	0.0606306
GATCCTCAGGAAGGGGG	s	T	4			10	3	74	21	7.4	0.000133863	0.0606306
GATCCTGACGGCCAGAG	s	T	1			75	12	189	14	2.52	0.000182122	0.0608019
GATCCCCCCGGGCATGG	s	T	3			198	3	364	14	1.83838	0.000189074	0.0613819
GATCATAGCCTCTAGCT	s	Th	1			0	0	44	8	#DIV/0!	0.000126201	0.0620318
GATCGCTGGAGGCCAGG	s	Th	1			0	0	44	41	#DIV/0!	0.000126201	0.0620318
GATCTCCTTCTTAGCCC	s	Th	3			0	0	44	5	#DIV/0!	0.000126201	0.0620318
GATCGCTTGAAACTGGG	s	Th	5			0	0	44	12	#DIV/0!	0.000126201	0.0620318
GATCCATCTGGCCGATG	s	T	3			0	0	46	3	#DIV/0!	0.000137089	0.0620318
GATCCCTCTCGGACCCT	s	Th	1			58	13	157	6	2.7069	0.000181661	0.0692208
GATCCAGCCGTTCCAGT	s	T	4			3	0	50	7	16.6667	0.000344869	0.0693882
GATCACAGCCACTGGTC	s	Th	2			0	0	43	13	#DIV/0!	0.000220483	0.0696973
GATCACCTGGGCCCAGG	s	Th	4			0	0	43	3	#DIV/0!	0.000220483	0.0696973
GATCATGCCACCATACT	s	T	5			0	0	43	3	#DIV/0!	0.000248529	0.0696973
GATCCCCATCAAACGCT	s	T	1			13	1	74	9	5.69231	0.000391339	0.0702513
GATCCTGGGTCCCTGAT	s	T	1			0	0	39	5	#DIV/0!	0.000451822	0.0725022
GATCCCCATCAAGCTAT	s	T	1			0	0	39	6	#DIV/0!	0.000451822	0.0725022
GATCGCCTAAGTTCACG	s	T	1			0	0	39	40	#DIV/0!	0.000451822	0.0725022
GATCCCTCACATCCACA	s	Th	1			0	0	39	7	#DIV/0!	0.000386126	0.0725022
GATCATTTGGTTAGTTG	s	Th	3			0	0	39	7	#DIV/0!	0.000386126	0.0725022
GATCACTGCTCGAAGGA	s	Th	5			0	0	39	10	#DIV/0!	0.000386126	0.0725022
GATCCAGTTCCTGCCTC	s	T	1			0	0	41	6	#DIV/0!	0.000451822	0.0725022
GATCTGCCAGTCAGTGG	s	Th	1			0	0	41	2	#DIV/0!	0.000220483	0.0725022
GATCTGTCTGAGTCTAA	s	Th	1			0	0	41	5	#DIV/0!	0.000220483	0.0725022
GATCGTGCCATTTCACT	s	Th	4			0	0	41	2	#DIV/0!	0.000220483	0.0725022
GATCCCACCAGGGCCGC	s	T	1			10	6	65	0	6.5	0.00040716	0.0726439
GATCGGAGCCGACTCGG	s	Th	1			34	8	113	7	3.32353	0.00021161	0.073007
GATCCCTTGTGGCTATG	s	Th	1			12	13	71	3	5.91667	0.000256974	0.073142
GATCACGTGCGGCAGAG	s	Th	1			50	14	138	32	2.76	0.000317751	0.0732594
GATCTGTCCCCACCCTC	s	T	1			25	1	93	28	3.72	0.0010156	0.0919924
GATCCAAGAGGCCTCAA	s	T	1			3	3	46	12	15.3333	0.000621641	0.0920388
GATCCAGGCAACCAAGC	s	T	1			10	4	63	10	6.3	0.000708636	0.0921634
GATCGCCCAGCGGGGCC	s	Th	1			0	0	38	5	#DIV/0!	0.000386126	0.0922803
GATCCTAATGGGCCAGC	s	Th	1			0	0	38	8	#DIV/0!	0.000386126	0.0922803
GATCACAGCTACTCGGG	s	Th	4			0	0	38	41	#DIV/0!	0.000386126	0.0922803
GATCTCAGCTTCTCAGC	s	Th	5			0	0	38	5	#DIV/0!	0.000386126	0.0922803
GATCTTATTCTGCTGCT	s	Th	5			0	0	38	12	#DIV/0!	0.000386126	0.0922803
GATCATGGGTCCTCTTA	s	T	1			18	4	78	13	4.33333	0.00145898	0.0926727
GATCACCCAGCAGTCCA	s	Th	1			164	4	299	40	1.82317	0.000540328	0.0929869
GATCCTCCTGCAGGGCT	s	T	1			277	1	447	77	1.61372	0.000694555	0.0931838
GATCTCGCTGGGAAACG	s	Th	1			12	4	66	2	5.5	0.000708748	0.0968229
GATCTGCTCTTTTAGGA	s	Th	1			0	0	34	37	#DIV/0!	0.000678084	0.096944
GATCAGTTGTAAGTTCA	s	Th	1			0	0	34	12	#DIV/0!	0.000678084	0.096944
GATCGAGACCAGCCTGC	s	Th	3			0	0	34	8	#DIV/0!	0.000678084	0.096944
GATCCACAGGGGTGGTG	s	T	1			0	0	35	6	#DIV/0!	0.000824106	0.096944
GATCCCCCTCTGAAGTT	s	T	1			0	0	35	1	#DIV/0!	0.000824106	0.096944
GATCCTCTCGCCTCCCC	s	T	4			0	0	35	3	#DIV/0!	0.000824106	0.096944
GATCACCAGTTGACAAC	s	Th	1			0	0	36	6	#DIV/0!	0.000678084	0.096944
GATCAAGTCAGCATTTG	s	Th	1			0	0	36	6	#DIV/0!	0.000678084	0.096944
GATCTGGCTCATCCATC	s	Th	1			0	0	36	4	#DIV/0!	0.000678084	0.096944
GATCAGTCAGTGACCAC	s	Th	4			0	0	36	1	#DIV/0!	0.000678084	0.096944
* 0 tpm in the normal tissue was converted to 0.9 to calculate ratios of GBM/normal, to avoid dividing by zero.
** P value of 0 is P < 1.0-E16
