# Supplementary material for: Massively Parallel Signature Sequencing and Bioinformatics Analysis Identifies Up-Regulation of TGFBI and SOX4 in Human Glioblastoma
Source: PLoS One. 2010 Apr 19;5(4):e10210. doi: 10.1371/journal.pone.0010210 (PMC2856677; doi:10.1371/journal.pone.0010210)
Supplement: Table S6 — Enriched gene sets in GBM tissues. (0.03 MB XLS) [file pone.0010210.s006.xls]

## Sheet: Suppl_table6_gsea_report_enrich
Table S6: Enriched gene sets in GBM tissues
NAME	SIZE	ES	NES	NOM p-val	FDR q-val	FWER p-val	RANK AT MAX
STEMCELL_NEURAL_UP	370	-0.171845	-3.58516	0	0	0	1401
CARIES_PULP_UP	40	-0.434757	-3.26517	0	0	0	1025
TGFBETA_ALL_UP	30	-0.434067	-2.85602	0	0.00143841	0.003	1390
HSA04115_P53_SIGNALING_PATHWAY	16	-0.575639	-2.80084	0	0.00143137	0.004	663
CMV_24HRS_DN	23	-0.460555	-2.68095	0	0.00275783	0.01	1019
LEI_MYB_REGULATED_GENES	81	-0.255562	-2.63601	0	0.00275957	0.012	1563
BREAST_CANCER_ESTROGEN_SIGNALING	24	-0.434236	-2.54472	0	0.00352388	0.018	1341
CMV_ALL_DN	31	-0.387736	-2.54076	0	0.00308339	0.018	1167
TGFBETA_EARLY_UP	21	-0.451833	-2.51087	0	0.00351363	0.023	1390
CELL_CYCLE_KEGG	18	-0.491803	-2.46089	0	0.00601605	0.044	798
VHL_NORMAL_UP	115	-0.195239	-2.43785	0	0.00669421	0.054	1810
G1_TO_S_CELL_CYCLE_REACTOME	15	-0.520175	-2.39935	0	0.00867935	0.074	780
CELL_CYCLE	17	-0.47847	-2.38852	0	0.00854799	0.079	798
GAY_YY1_DN	53	-0.27081	-2.34491	0	0.0115772	0.11	933
HSA05222_SMALL_CELL_LUNG_CANCER	16	-0.492701	-2.31853	0.00199601	0.0148292	0.147	718
CARIES_PULP_HIGH_UP	16	-0.466332	-2.25181	0.00199203	0.0231085	0.234	1307
ALZHEIMERS_DISEASE_UP	300	-0.116363	-2.24464	0	0.022817	0.245	1378
HUMAN_CD34_ENRICHED_TRANSCRIPTION_FACTORS	37	-0.311005	-2.23435	0	0.0228854	0.258	1241
LEE_MYC_E2F1_UP	15	-0.48413	-2.22273	0	0.0239736	0.282	1430
LEE_E2F1_UP	16	-0.451734	-2.20736	0.00398406	0.0249531	0.306	1347
KENNY_WNT_UP	15	-0.464356	-2.18014	0	0.0272398	0.346	933
STEMCELL_EMBRYONIC_UP	210	-0.132267	-2.15325	0	0.030776	0.395	1016
CANCER_NEOPLASTIC_META_UP	25	-0.362885	-2.14222	0	0.031895	0.419	1325
IDX_TSA_UP_CLUSTER3	18	-0.401185	-2.09985	0.00417537	0.0399425	0.519	893
SERUM_FIBROBLAST_CELLCYCLE	22	-0.3784	-2.0829	0.0037594	0.0423881	0.554	595
TNFALPHA_ALL_UP	21	-0.373048	-2.06409	0	0.0455316	0.591	1343
LEE_TCELLS10_UP	19	-0.386862	-2.05379	0.00194932	0.0462842	0.61	1263
ESR_FIBROBLAST_UP	18	-0.402402	-2.04051	0.00221729	0.0487925	0.637	1349
LEE_TCELLS8_UP	19	-0.386862	-2.03797	0	0.0477218	0.642	1263
LEE_TCELLS1_UP	19	-0.386862	-2.03258	0.00596422	0.0481935	0.655	1263
AGEING_KIDNEY_SPECIFIC_UP	36	-0.280678	-2.02385	0.00400802	0.0486712	0.672	1228
UVB_NHEK1_DN	43	-0.258617	-2.01642	0.00404858	0.0488516	0.682	1799
LEE_TCELLS2_UP	202	-0.129442	-2.01527	0.00204082	0.0476975	0.683	1485
SHEPARD_BMYB_MORPHOLINO_DN	38	-0.278746	-2.01187	0.00821355	0.0469388	0.688	984
HSA03010_RIBOSOME	34	-0.291913	-2.01094	0.00207469	0.0457597	0.69	1395
WIELAND_HEPATITIS_B_INDUCED	22	-0.365465	-2.00928	0	0.0448341	0.692	1382
RAS_ONCOGENIC_SIGNATURE	47	-0.254722	-1.99828	0.00392927	0.0467526	0.725	601
HSA04512_ECM_RECEPTOR_INTERACTION	18	-0.388524	-1.99081	0	0.0475894	0.745	1387
VERHAAK_AML_NPM1_MUT_VS_WT_UP	34	-0.289752	-1.98479	0.0140562	0.0484713	0.763	1563
BRCA_ER_NEG	169	-0.132229	-1.98459	0.00392927	0.0473268	0.763	458
JISON_SICKLECELL_DIFF	108	-0.167422	-1.97668	0.00207039	0.0481753	0.78	1395
DNA_DAMAGE_SIGNALING	19	-0.38067	-1.96946	0.00623701	0.0490196	0.791	1425
AGEING_KIDNEY_UP	78	-0.19069	-1.94168	0.00819672	0.0561148	0.838	1257
LEE_ACOX1_UP	19	-0.370786	-1.9361	0.00589391	0.0563332	0.841	1307
RIBOSOMAL_PROTEINS	44	-0.247788	-1.93287	0.0094518	0.0559053	0.848	1396
BRG1_ALAB_UP	16	-0.396898	-1.93123	0.00772201	0.0552816	0.851	1325
FLECHNER_KIDNEY_TRANSPLANT_REJECTION_UP	19	-0.372248	-1.91904	0.011583	0.0583175	0.869	1303
HSA04110_CELL_CYCLE	25	-0.320249	-1.90874	0.0207039	0.0604535	0.884	780
HYPOXIA_REVIEW	24	-0.332967	-1.90289	0.00576923	0.0611615	0.893	1388
SASAKI_ATL_UP	38	-0.260892	-1.89394	0.00784314	0.0633357	0.9	960
SASAKI_TCELL_LYMPHOMA_VS_CD4_UP	38	-0.260892	-1.89213	0.0190275	0.0626248	0.903	960
CANCER_UNDIFFERENTIATED_META_UP	21	-0.341969	-1.88278	0.00790514	0.0647119	0.913	1428
ADIP_DIFF_UP	17	-0.376887	-1.87895	0.0141414	0.0651492	0.921	752
SHEPARD_CRASH_AND_BURN_MUT_VS_WT_UP	35	-0.266478	-1.87196	0.00574713	0.0666497	0.931	1087
HSA01430_CELL_COMMUNICATION	20	-0.349635	-1.85748	0.00614754	0.0706879	0.941	1387
IGLESIAS_E2FMINUS_UP	40	-0.251804	-1.84341	0.00603622	0.0755668	0.955	1453
BOQUEST_CD31PLUS_VS_CD31MINUS_UP	125	-0.145274	-1.82362	0.00860215	0.0825996	0.964	1096
CIS_XPC_UP	35	-0.259778	-1.79959	0.0163599	0.0920953	0.976	869
MYC_TARGETS	17	-0.358396	-1.77783	0.0134615	0.102515	0.98	1289
GNATENKO_PLATELET	21	-0.324332	-1.76838	0.0150862	0.10599	0.98	1345
GNATENKO_PLATELET_UP	21	-0.324332	-1.73003	0.0307692	0.127206	0.995	1345
NING_COPD_UP	44	-0.218189	-1.7231	0.0181087	0.129917	0.995	1351
RUIZ_TENASCIN_TARGETS	15	-0.37023	-1.71317	0.0307377	0.134811	0.997	1191
UVB_NHEK2_UP	20	-0.321126	-1.71068	0.0291829	0.134467	0.998	1465
OXSTRESS_RPETWO_DN	27	-0.276495	-1.70823	0.0241449	0.133781	0.998	1390
GUO_HEX_DN	16	-0.351277	-1.70786	0.0237624	0.132067	0.998	1450
BRENTANI_CELL_CYCLE	15	-0.356293	-1.7012	0.0203252	0.134912	0.998	678
LE_MYELIN_UP	20	-0.321126	-1.68856	0.0337972	0.142149	1	776
HDACI_COLON_BUT12HRS_DN	18	-0.32749	-1.68573	0.0205339	0.14231	1	1401
HDACI_COLON_CUR_UP	32	-0.250872	-1.65386	0.042065	0.164487	1	1643
BRENTANI_TRANSCRIPTION_FACTORS	16	-0.335766	-1.63278	0.0515464	0.179325	1	1148
HEARTFAILURE_VENTRICLE_DN	15	-0.349824	-1.63029	0.0451866	0.178697	1	512
CHEN_HOXA5_TARGETS_UP	19	-0.312655	-1.62717	0.0382409	0.178738	1	1176
BASSO_HCL_DIFF	24	-0.277696	-1.62221	0.0382294	0.18089	1	1539
HSA05220_CHRONIC_MYELOID_LEUKEMIA	19	-0.305713	-1.6159	0.0499002	0.183901	1	1195
BREASTCA_TWO_CLASSES	34	-0.240178	-1.61183	0.0582329	0.184903	1	1779
SHEPARD_GENES_COMMON_BW_CB_MO	15	-0.351721	-1.60644	0.0277228	0.187226	1	1058
SHEPARD_CRASH_AND_BURN_MUT_VS_WT_DN	26	-0.265201	-1.60518	0.0430528	0.185984	1	1715
BOQUEST_CD31PLUS_VS_CD31MINUS_DN	50	-0.197487	-1.60402	0.0478927	0.184916	1	569
HSA05215_PROSTATE_CANCER	16	-0.333303	-1.60114	0.044316	0.184901	1	638
ROS_MOUSE_AORTA_DN	26	-0.258608	-1.59123	0.0357143	0.191074	1	1627
TAKEDA_NUP8_HOXA9_8D_DN	31	-0.242817	-1.5815	0.0575397	0.197326	1	1473
HSC_INTERMEDIATEPROGENITORS_FETAL	25	-0.268151	-1.57363	0.0535714	0.202455	1	1253
ZUCCHI_EPITHELIAL_UP	16	-0.323449	-1.56408	0.0498084	0.209207	1	1354
BREASTCA_THREE_CLASSES	16	-0.314051	-1.55743	0.0458167	0.21326	1	1552
HDACI_COLON_BUT16HRS_DN	25	-0.259626	-1.53763	0.064	0.230605	1	1607
TNFALPHA_30MIN_UP	15	-0.325356	-1.5364	0.0658683	0.229228	1	1314
INOS_ALL_DN	26	-0.248352	-1.52886	0.0582121	0.23497	1	1549
HSA04510_FOCAL_ADHESION	41	-0.207501	-1.52306	0.056962	0.238313	1	1387
CROONQUIST_IL6_STROMA_UP	19	-0.293272	-1.52245	0.0662651	0.236124	1	1084
PENG_GLUTAMINE_DN	72	-0.156483	-1.51978	0.0679612	0.236215	1	1648
RUTELLA_HEMATOGFSNDCS_DIFF	143	-0.109557	-1.51249	0.0510018	0.241441	1	1430
